# Supplementary material for: An AR-ERG transcriptional signature defined by long-range chromatin interactomes in prostate cancer cells
Source: PubMed Central journal article supplement — Genome Res. 2019 Feb;29(2):223–35. doi: 10.1101/gr.230243.117 (PMC6360806; doi:10.1101/gr.230243.117), 2019-02
Supplement: supp_gr.230243.117_Supplemental_Fig_S1.pdf [file supp_gr.230243.117_Supplemental_Fig_S1.pdf]

Overlapping of ARBS defined By ChIP-seq and ChIA-PET

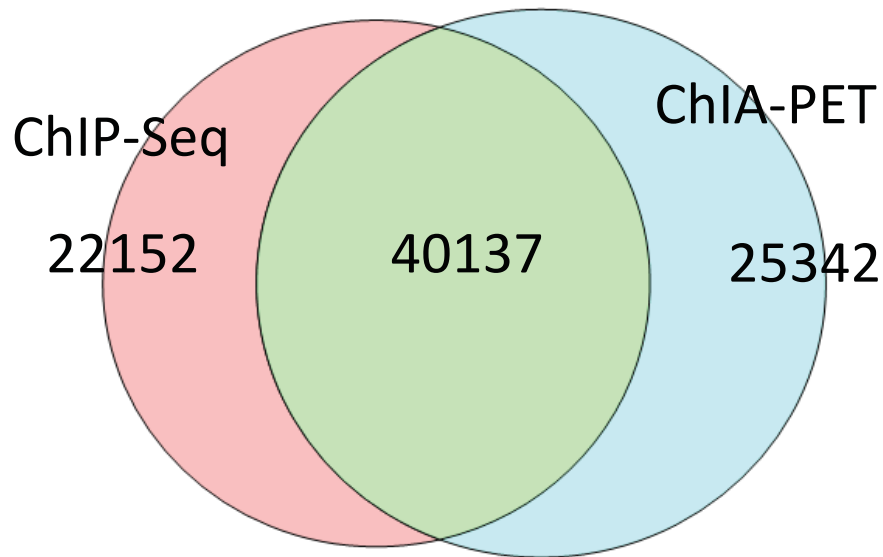

Figure.S1: Venn diagram shows the overlapping the fraction between ARBS defined by ChIP-seq experiment and ChIA-PET experiment.
