# Supplementary material for: An AR-ERG transcriptional signature defined by long-range chromatin interactomes in prostate cancer cells
Source: PubMed Central journal article supplement — Genome Res. 2019 Feb;29(2):223–35. doi: 10.1101/gr.230243.117 (PMC6360806; doi:10.1101/gr.230243.117), 2019-02
Supplement: supp_gr.230243.117_Supplemental_Fig_S2.pdf [file supp_gr.230243.117_Supplemental_Fig_S2.pdf]

## Intra-chromosome 18 interaction (7231764-8342638)

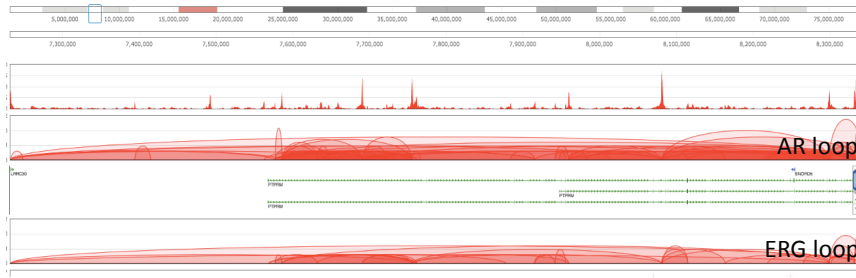

P1: chr18: RP11-207D14-Biotin  
P2: chr18:RP11-408I22-Dig  
P3: chr18: RP11-29P22-Biotin

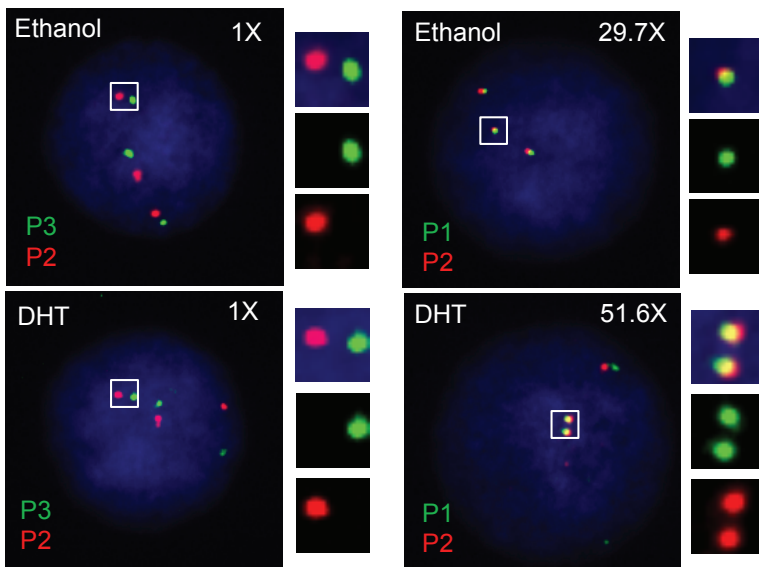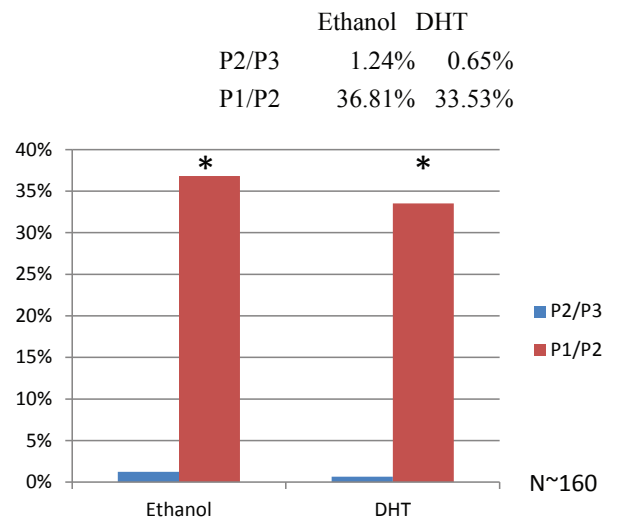

16

Figure S2: FISH experiment for intra-Chromosome 18 interaction (7231764-8342638). Upper panel: genome browser view shows the AR/ERG ChIA-PET looping for the region of variation. Bottom Left: microscope snapshot figures in this FISH experiment. Bottom Right: The bar chart shows summary of the validation rate of FISH experiments by examining 160 cells. The normalized overlap rates were tested by Fisher's Exact Test. \* indicates that the difference is significant difference ( $p < 0.05$ ).
