# Supplementary material for: An AR-ERG transcriptional signature defined by long-range chromatin interactomes in prostate cancer cells
Source: PubMed Central journal article supplement — Genome Res. 2019 Feb;29(2):223–35. doi: 10.1101/gr.230243.117 (PMC6360806; doi:10.1101/gr.230243.117), 2019-02
Supplement: supp_gr.230243.117_Supplemental_Fig_S5.pdf [file supp_gr.230243.117_Supplemental_Fig_S5.pdf]

Intra-chromosome 11 interaction  
(chr11:90096303 & chr11: 92923321)

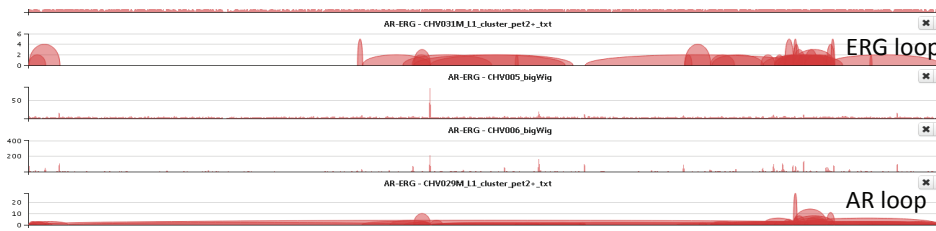

P1: chr11: RP11-354D24-Biotin  
P2: chr11: RP11-231J18-Dig  
P3: chr11: RP11-794H24-Biotin

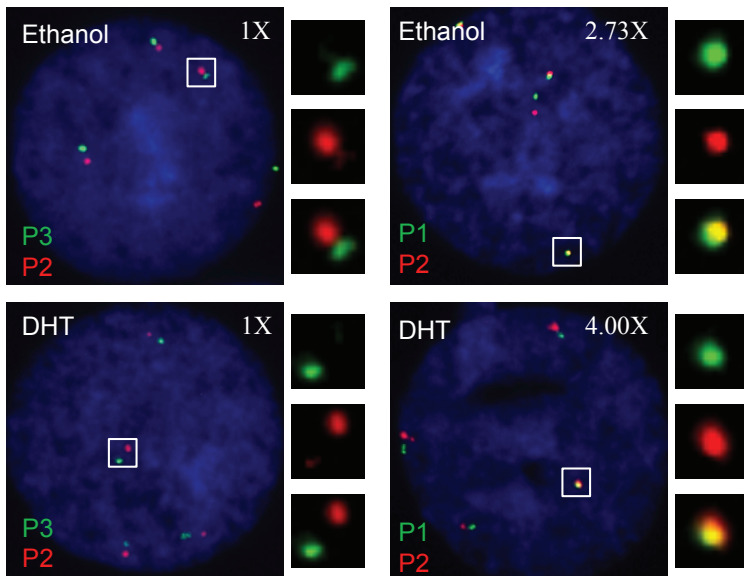

|       | Ethanol | DHT    |
|-------|---------|--------|
| P2/P3 | 8.15%   | 7.05%  |
| P1/P2 | 22.25%  | 28.18% |

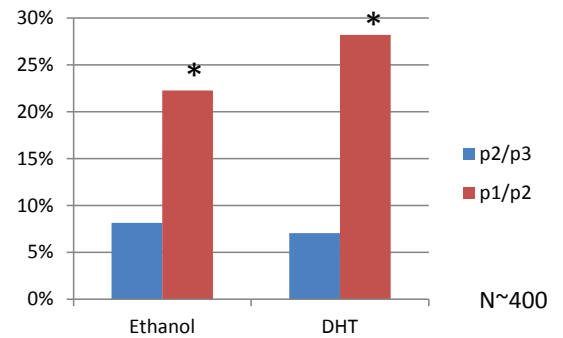

Figure S5: FISH experiment for intra-Chromosome 11 interaction (90096303-92923321). Upper panel: genome browser view shows the AR/ERG ChIA-PET looping for the region of variation. Bottom Left: microscope snapshot figures in this FISH experiment. Bottom Right: The bar chart shows summary of the validation rate of FISH experiments by examining 400 cells. The normalized overlap rates were tested by Fisher's Exact Test. \* indicates that the difference is significant difference ( $p < 0.05$ ).
