# Supplementary material for: An AR-ERG transcriptional signature defined by long-range chromatin interactomes in prostate cancer cells
Source: PubMed Central journal article supplement — Genome Res. 2019 Feb;29(2):223–35. doi: 10.1101/gr.230243.117 (PMC6360806; doi:10.1101/gr.230243.117), 2019-02
Supplement: supp_gr.230243.117_Supplemental_Fig_S6.pdf [file supp_gr.230243.117_Supplemental_Fig_S6.pdf]

Intra-chromosome 4 interaction  
(chr4: 4673764 & chr4: 6635581)

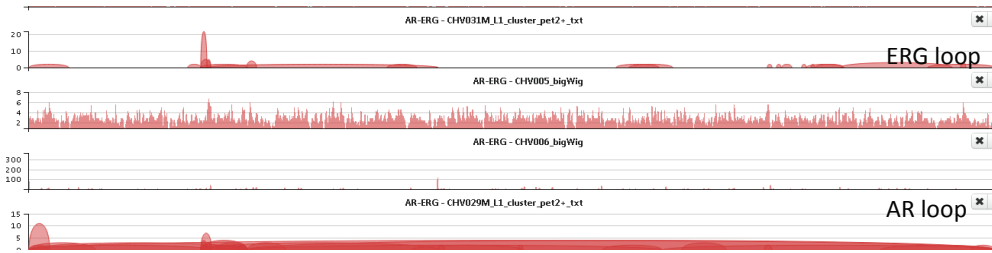

P1: chr4: RP11-139E15-Biotin  
P2: chr4: RP11-9K9-Dig  
P3: chr4: RP11-693B19-Biotin

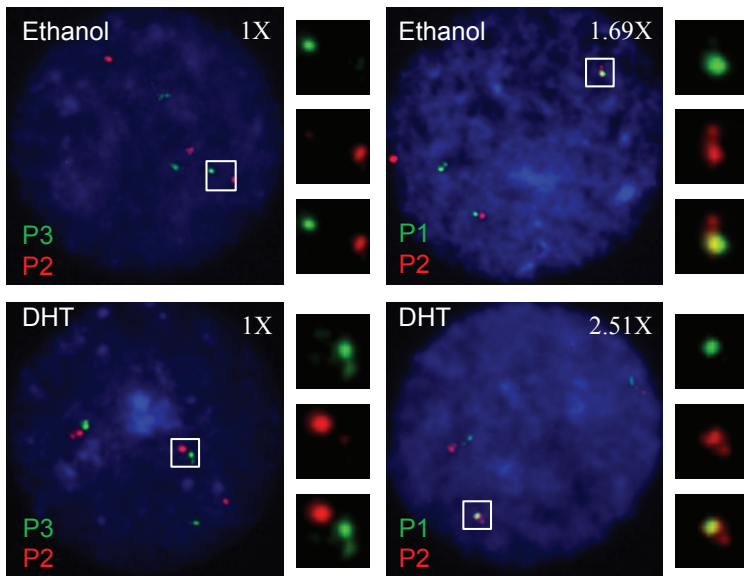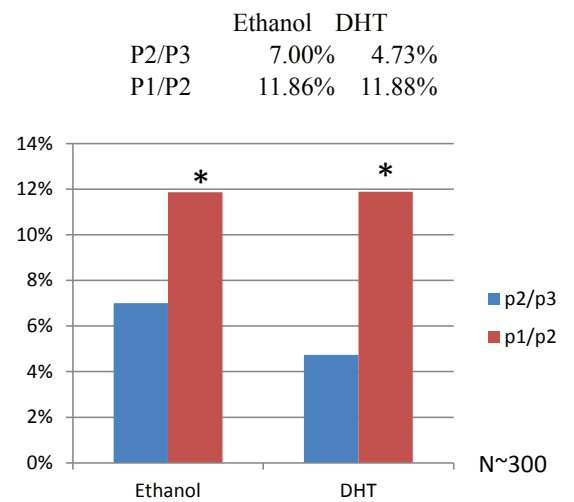

Figure S6: FISH experiment for intra-Chromosome 4 interaction (4673764-6635581). Upper panel: genome browser view shows the AR/ERG ChIA-PET looping for the region of variation. Bottom Left: microscope snapshot figures in this FISH experiment. Bottom Right: The bar chart shows summary of the validation rate of FISH experiments by examining 300 cells. The normalized overlap rates were tested by Fisher's Exact Test. \* indicates that the difference is significant difference ( $p < 0.05$ ).
