# Supplementary material for: An AR-ERG transcriptional signature defined by long-range chromatin interactomes in prostate cancer cells
Source: PubMed Central journal article supplement — Genome Res. 2019 Feb;29(2):223–35. doi: 10.1101/gr.230243.117 (PMC6360806; doi:10.1101/gr.230243.117), 2019-02
Supplement: supp_gr.230243.117_Supplemental_Fig_S7.pdf [file supp_gr.230243.117_Supplemental_Fig_S7.pdf]

Intra-chromosome 15 interaction  
(chr15:20805068 & chr15: 21950330)

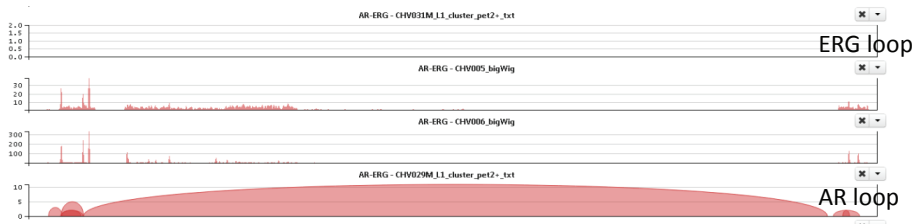

P1: chr15: RP11-593N20-Biotin  
P2: chr15: RP11-484F6-Dig  
P3: chr15: RP11-161D19-Biotin

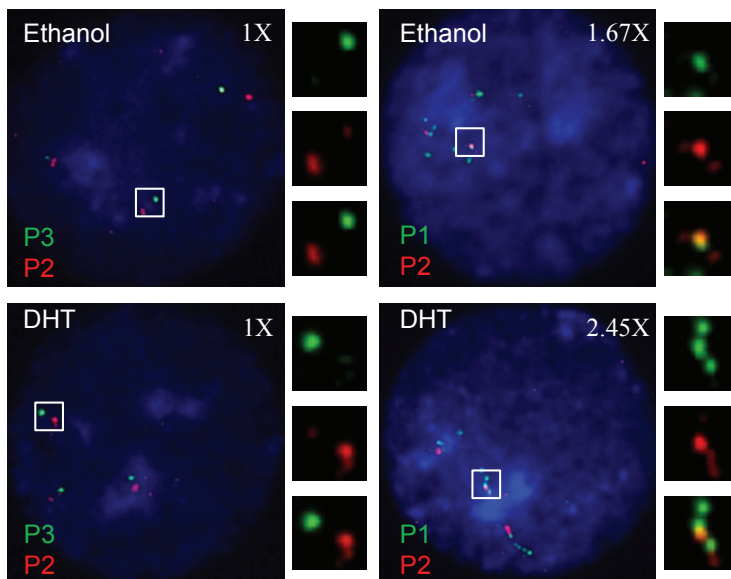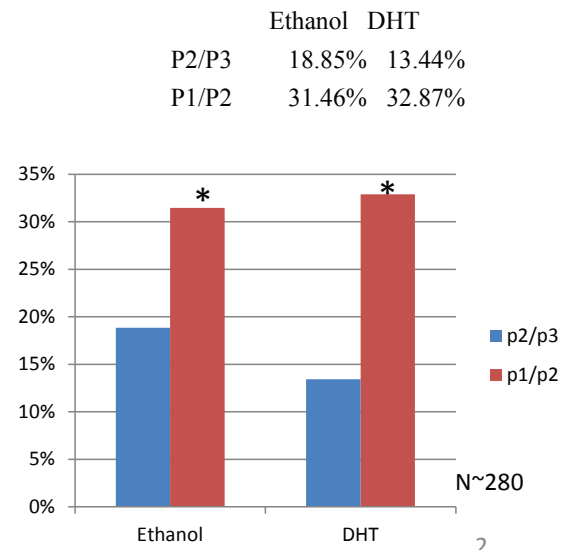

Figure S7: FISH experiment for intra-Chromosome 15 interaction (20805068-21950330). Upper panel: genome browser view shows the AR/ERG ChIA-PET looping for the region of variation. Bottom Left: microscope snapshot figures in this FISH experiment. Bottom Right: The bar chart shows summary of the validation rate of FISH experiments by examining 280 cells. The normalized overlap rates were tested by Fisher's Exact Test. \* indicates that the difference is significant difference ( $p < 0.05$ ).
