# Supplementary material for: An AR-ERG transcriptional signature defined by long-range chromatin interactomes in prostate cancer cells
Source: PubMed Central journal article supplement — Genome Res. 2019 Feb;29(2):223–35. doi: 10.1101/gr.230243.117 (PMC6360806; doi:10.1101/gr.230243.117), 2019-02
Supplement: supp_gr.230243.117_Supplemental_Fig_S8.pdf [file supp_gr.230243.117_Supplemental_Fig_S8.pdf]

Inter-chromosome 11 and 2 interaction  
(chr11:68743476-68744594 & chr2: 85496806-85497419)

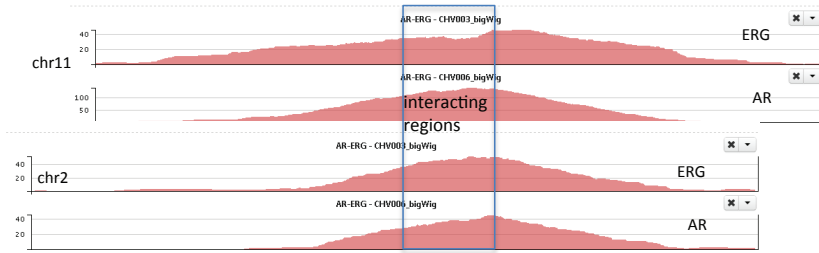

P1: chr11: RP11-166J17-Biotin  
P2: chr16: RP11-109H12-Dig  
P3: chr8: RP11-91K2-Biotin

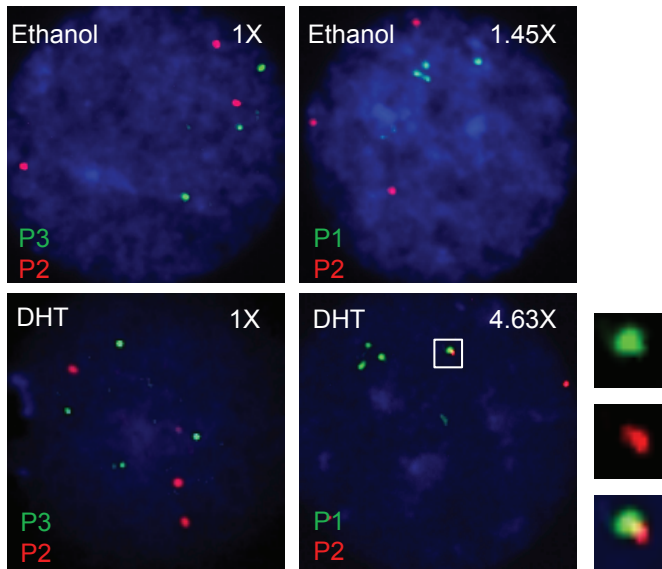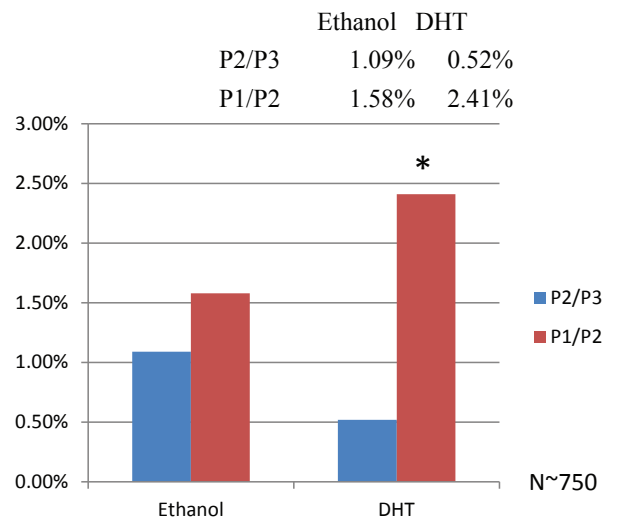

18

Figure S8: FISH experiment for inter-Chromosome interaction between chr11 and chr2 (chr11:68743476-68744594 & chr2: 85496806-85497419). Upper panel: genome browser view shows the AR/ERG ChIA-PET looping for the region of variation. Bottom Left: microscope snapshot figures in this FISH experiment. Bottom Right: The bar chart shows summary of the validation rate of FISH experiments by examining 750 cells. The normalized overlap rates were tested by Fisher's Exact Test. \* indicates that the difference is significant difference ( $p < 0.05$ ).
