# Supplementary material for: An AR-ERG transcriptional signature defined by long-range chromatin interactomes in prostate cancer cells
Source: PubMed Central journal article supplement — Genome Res. 2019 Feb;29(2):223–35. doi: 10.1101/gr.230243.117 (PMC6360806; doi:10.1101/gr.230243.117), 2019-02
Supplement: supp_gr.230243.117_Supplemental_Fig_S10.pdf [file supp_gr.230243.117_Supplemental_Fig_S10.pdf]

### FOXA1 Motif Logo

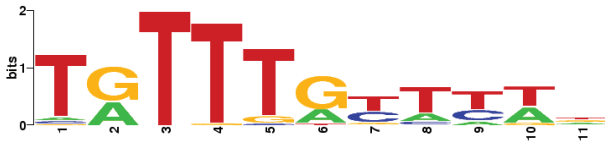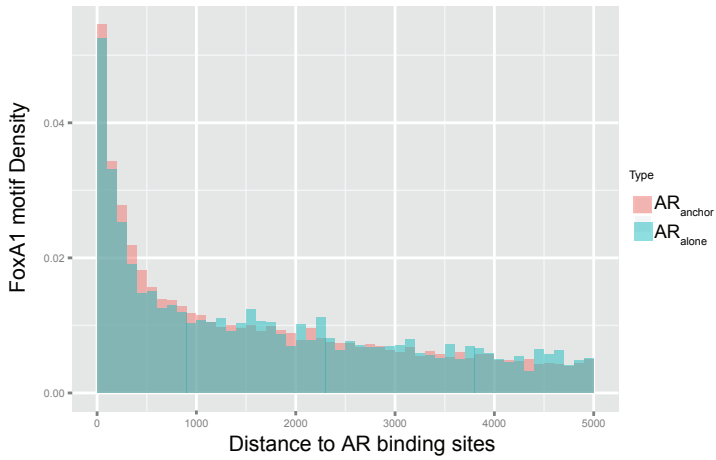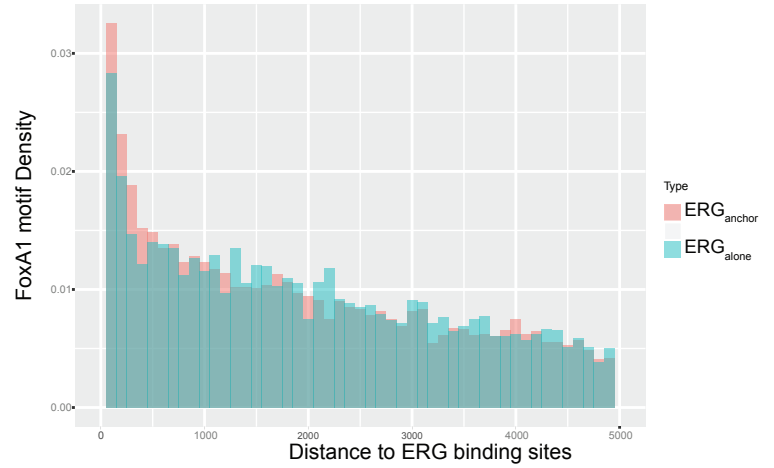

### HOXA1 Motif Logo

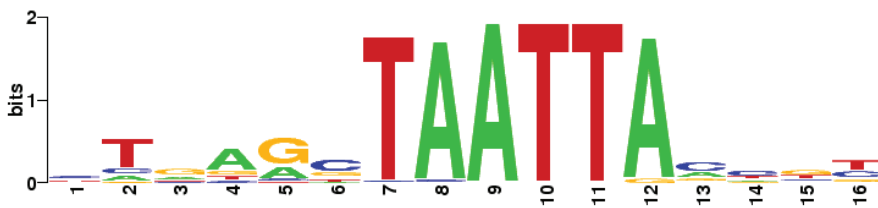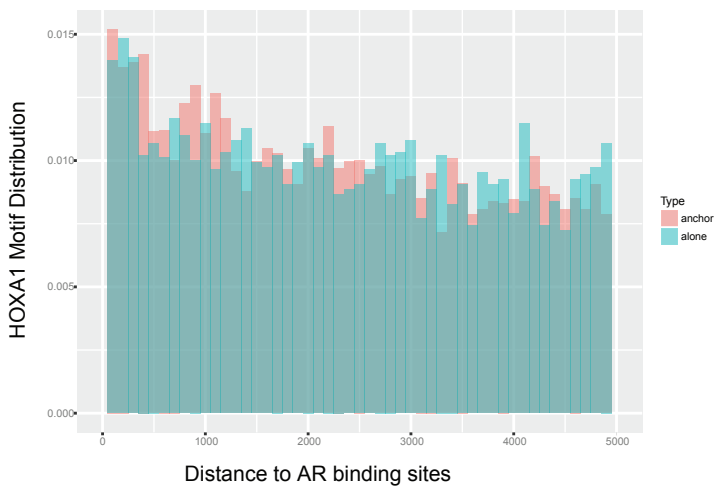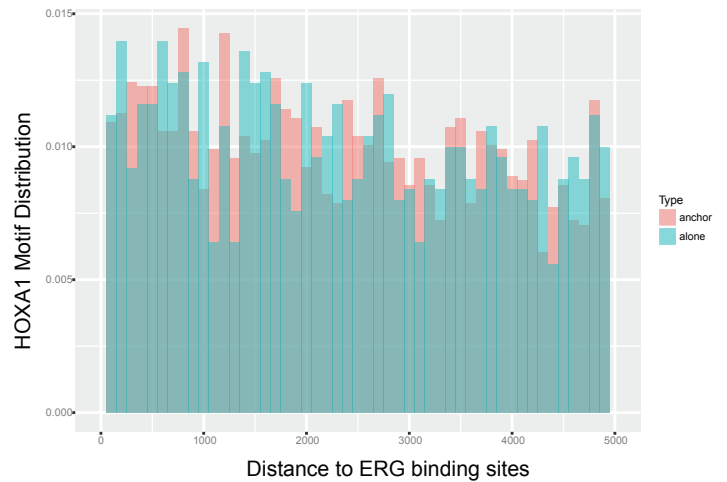

Figure S10: Upper panel: FOXA1 motif distance distribution to AR (ERG) binding sites with chromatin looping (red) and without chromatin looping (green). FOXA1 motif shows strongly enriched to AR and ERG binding site regardless with/without looping. Bottom panel: HOXA1 motif distance distribution to AR (ERG) binding sites with chromatin looping (red) and without chromatin looping (green). HOXA1 motif doesn't show strong enrichment to AR and ERG binding site regardless with/without looping.
