# Supplementary material for: An AR-ERG transcriptional signature defined by long-range chromatin interactomes in prostate cancer cells
Source: PubMed Central journal article supplement — Genome Res. 2019 Feb;29(2):223–35. doi: 10.1101/gr.230243.117 (PMC6360806; doi:10.1101/gr.230243.117), 2019-02
Supplement: supp_gr.230243.117_Supplemental_Fig_S11.pdf [file supp_gr.230243.117_Supplemental_Fig_S11.pdf]

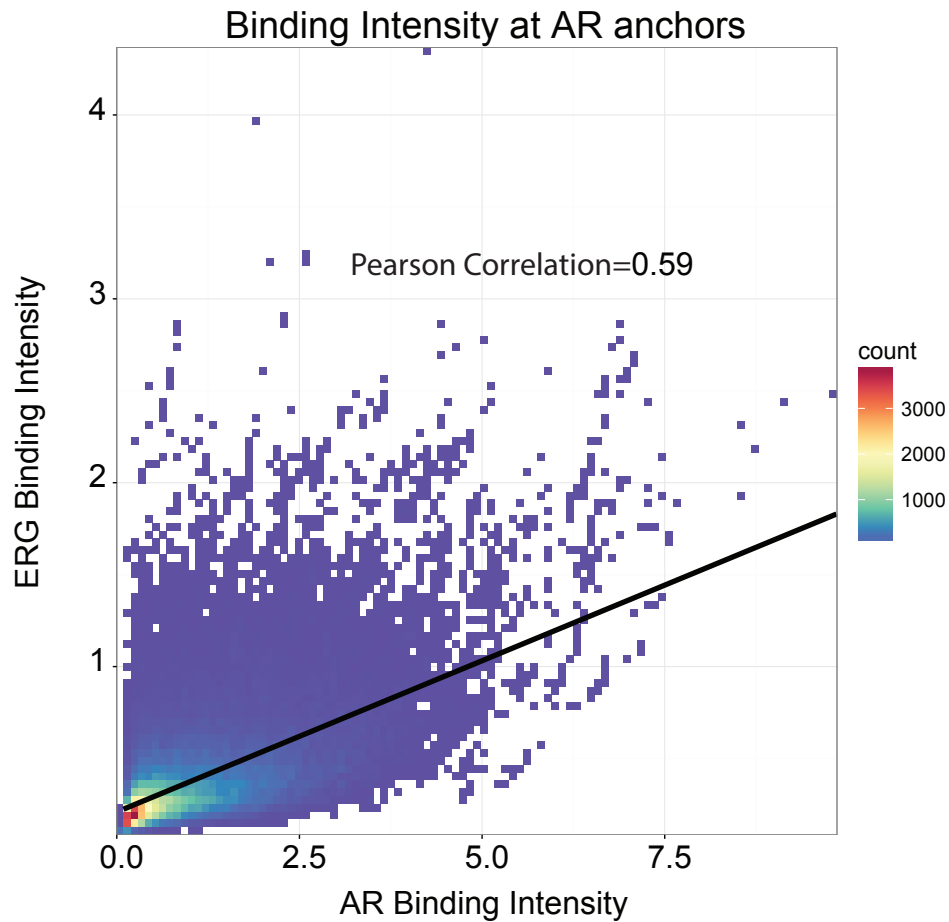

Figure.S11: Binding intensity of AR and ERG on AR ChIA-PET interaction anchor. The binding intensity is the average read depth from our ChIP-seq data of AR and ERG (2hour after DHT). The solid black line represent the linear regression line, and the pearson correlation of the binding intensity between AR and ERG is 0.59 .
