# Supplementary material for: An AR-ERG transcriptional signature defined by long-range chromatin interactomes in prostate cancer cells
Source: PubMed Central journal article supplement — Genome Res. 2019 Feb;29(2):223–35. doi: 10.1101/gr.230243.117 (PMC6360806; doi:10.1101/gr.230243.117), 2019-02
Supplement: supp_gr.230243.117_Supplemental_Fig_S12.pdf [file supp_gr.230243.117_Supplemental_Fig_S12.pdf]

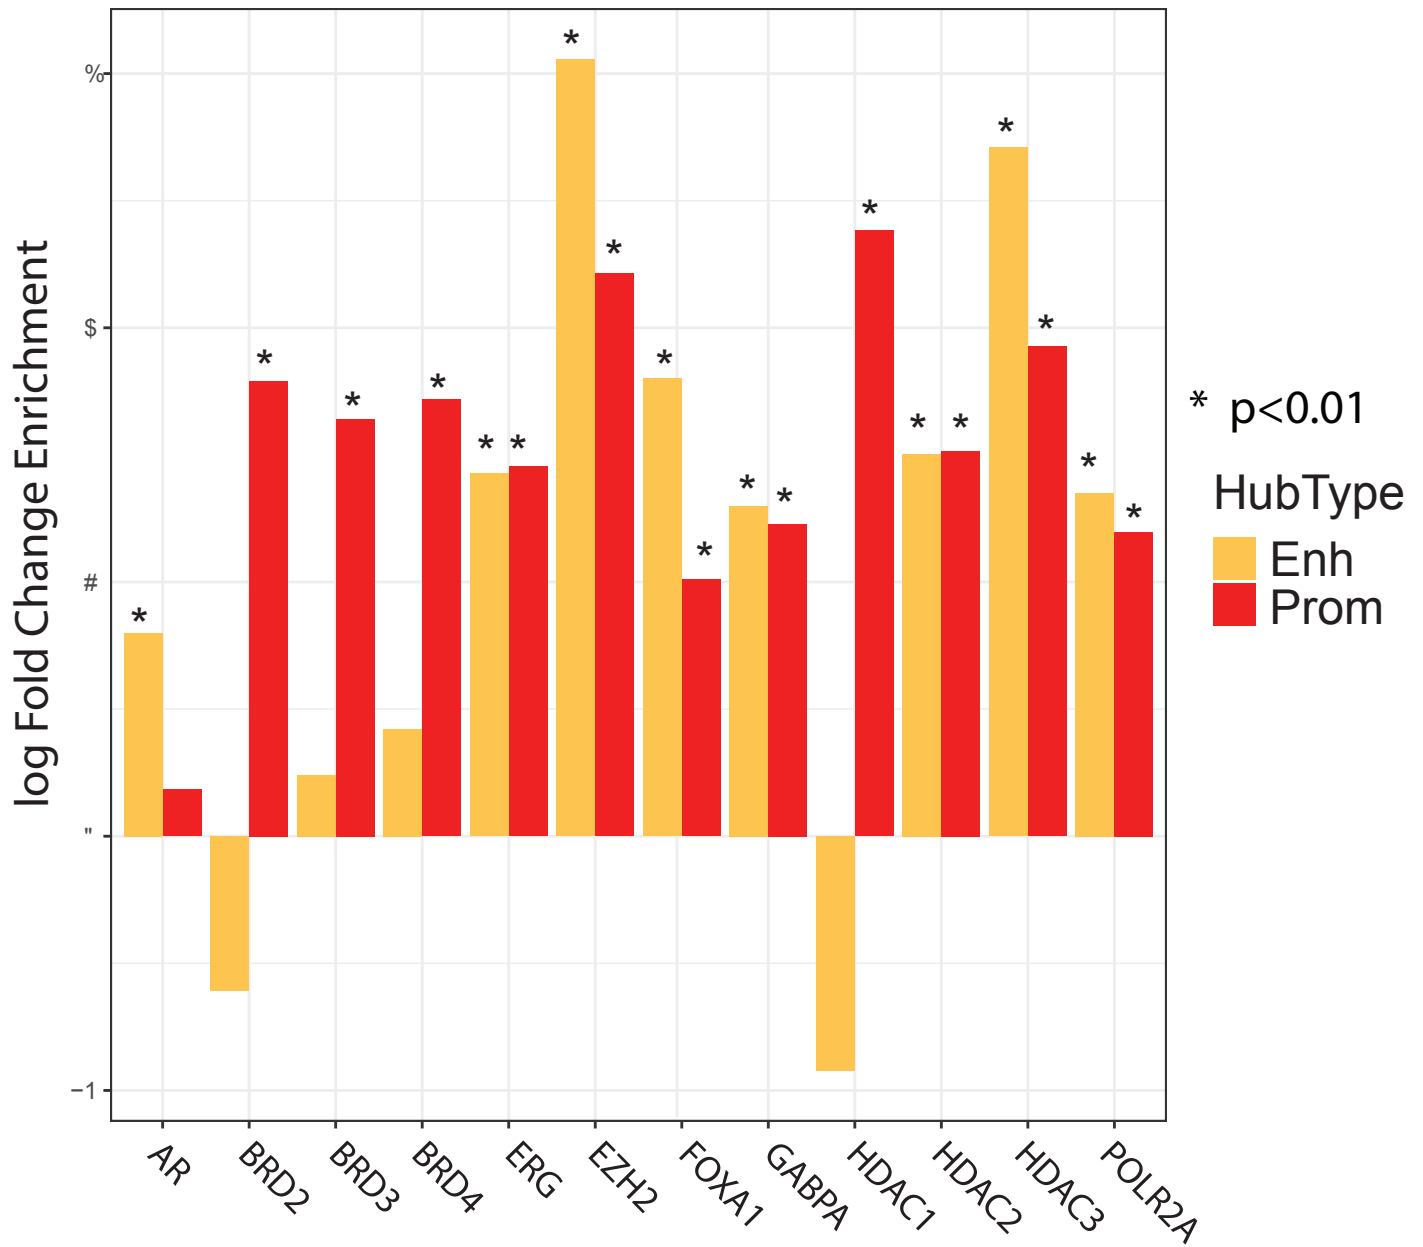

Figure. S12: Statistical enrichment analysis for the overlapping between the binding sites of the hub region with the non-hubs (AR/ERG binding with similar chip intensity profile). We computed the p-value using hypergeometric test, assuming the percentage of overlapping with hub region is the same as the percentage of overlapping with the non-hub regions. The fold change enrichment was computed as ratio between those two percentages of overlapping.
