# Supplementary material for: An AR-ERG transcriptional signature defined by long-range chromatin interactomes in prostate cancer cells
Source: PubMed Central journal article supplement — Genome Res. 2019 Feb;29(2):223–35. doi: 10.1101/gr.230243.117 (PMC6360806; doi:10.1101/gr.230243.117), 2019-02
Supplement: supp_gr.230243.117_Supplemental_Fig_S13.pdf [file supp_gr.230243.117_Supplemental_Fig_S13.pdf]

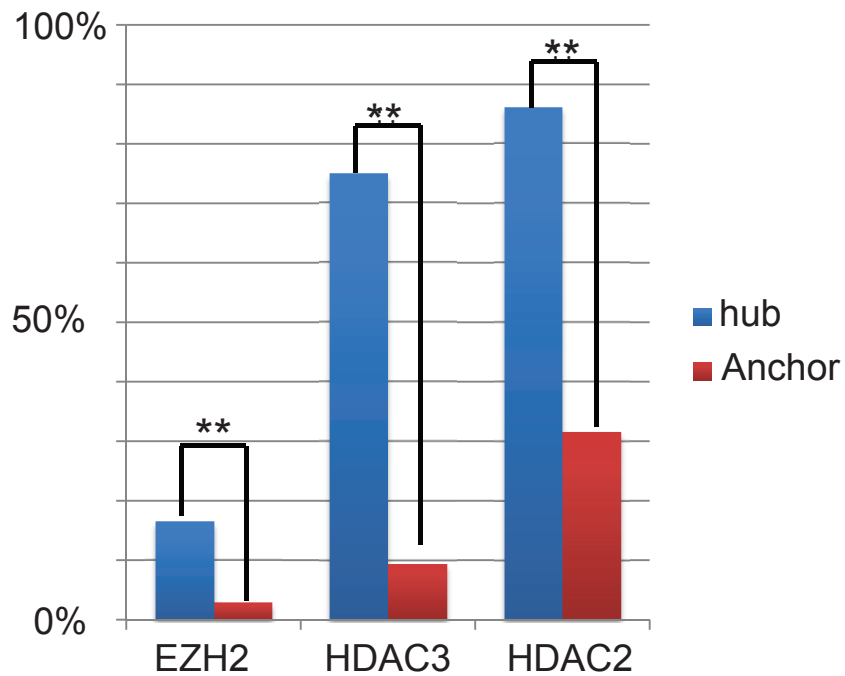

Figure.S13: The bar chart shows different percentage of hub regions or general anchor regions overlapping EZH2BS(left) and HDAC3BS(middle) and HDAC2 (right) respectively.

\*\* indicates the overlapping fraction difference is significant (p-value<0.01)
