# Supplementary material for: An AR-ERG transcriptional signature defined by long-range chromatin interactomes in prostate cancer cells
Source: PubMed Central journal article supplement — Genome Res. 2019 Feb;29(2):223–35. doi: 10.1101/gr.230243.117 (PMC6360806; doi:10.1101/gr.230243.117), 2019-02
Supplement: supp_gr.230243.117_Supplemental_Fig_S14.pdf [file supp_gr.230243.117_Supplemental_Fig_S14.pdf]

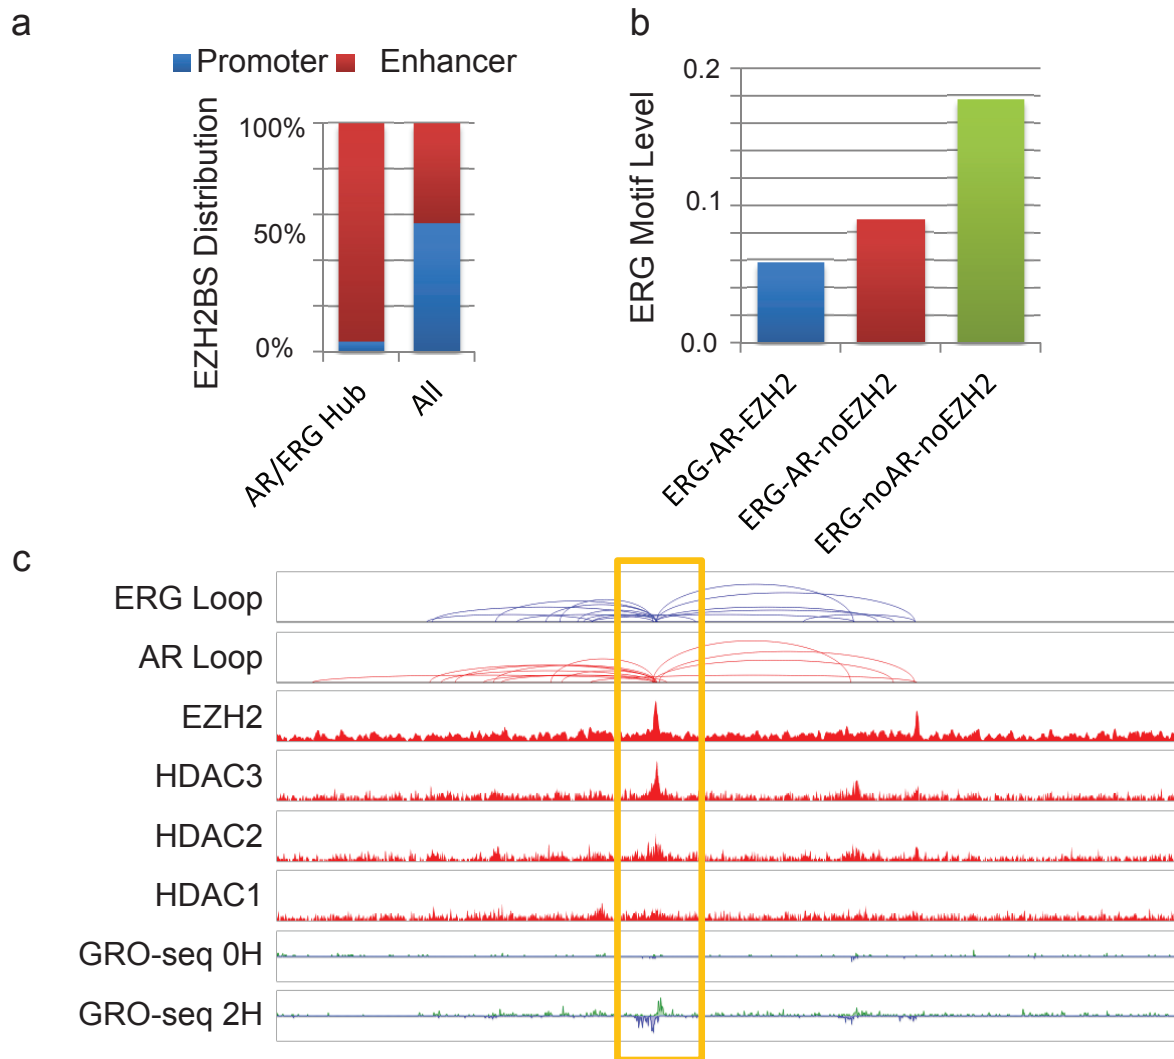

Figure.S14: EZH2 specially target AR Enhancer hub. (a)The graph shows different distribution between EZH2BS associated hub and all EZH2BS. The EZH2 in hub regions significantly associate with Enhancer regions. (b)ERG motif percentage in ERG-AR-EZH2 co-binding sites, ERG-AR co-binding sites without EZH2 (ERG-AR-noEZH2) and ERG alone binding sites (ERG-noAR-noEZH2). (c) Snapshot representation of (from top to bottom) the ERG looping, AR looping(denoted by ChIA-PET), EZH2, HDAC3, HDAC2 and HDAC1 binding sites (denoted by ChIRP-seq), transcriptional rate probes before and after DHT (denoted by Gro-Seq) Yellow rectangle highlights the transcriptional hub region.
