# Supplementary material for: An AR-ERG transcriptional signature defined by long-range chromatin interactomes in prostate cancer cells
Source: PubMed Central journal article supplement — Genome Res. 2019 Feb;29(2):223–35. doi: 10.1101/gr.230243.117 (PMC6360806; doi:10.1101/gr.230243.117), 2019-02
Supplement: supp_gr.230243.117_Supplemental_Fig_S16.pdf [file supp_gr.230243.117_Supplemental_Fig_S16.pdf]

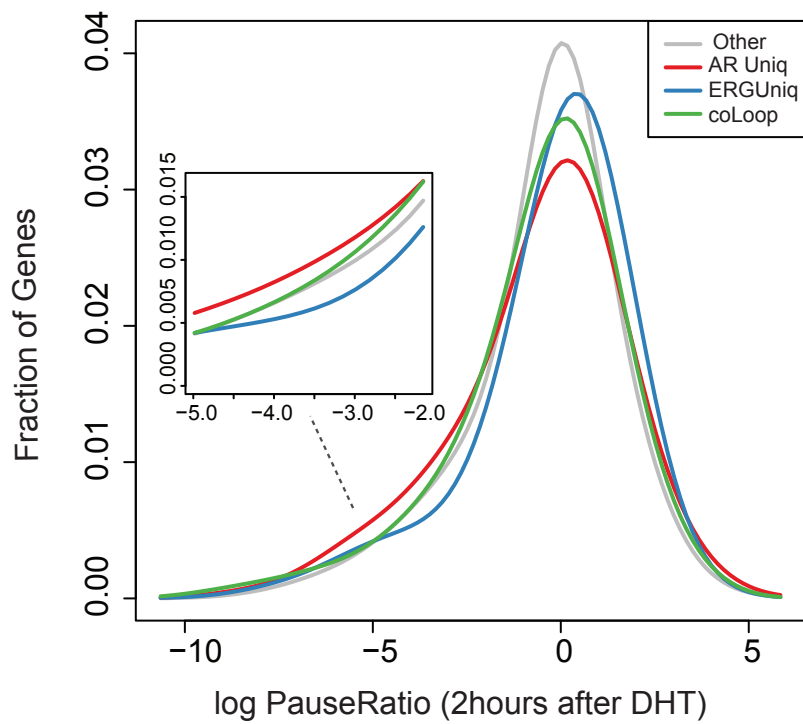

Figure.S16: Distribution of promoter pause ratio at 2h after DHT treatment. Genes are split into 4 categories depending on their association with different types of looping. The x-axis the log pause ratio defined by the ratio of GRO-seq signal between promoter and gene body, and y-axis is the fraction genes in the given gene categories.
