# Supplementary material for: An AR-ERG transcriptional signature defined by long-range chromatin interactomes in prostate cancer cells
Source: PubMed Central journal article supplement — Genome Res. 2019 Feb;29(2):223–35. doi: 10.1101/gr.230243.117 (PMC6360806; doi:10.1101/gr.230243.117), 2019-02
Supplement: supp_gr.230243.117_Supplemental_Fig_S17.pdf [file supp_gr.230243.117_Supplemental_Fig_S17.pdf]

AR<sup>+</sup>ERG<sup>+</sup> AR<sup>+</sup>ERG<sup>-</sup> AR<sup>-</sup>ERG<sup>+</sup> noLoop

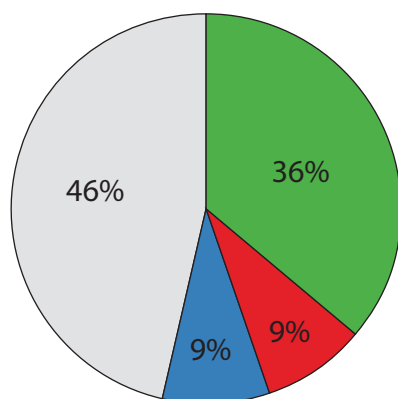

Figure.S17: Breakdown of the differentially expressed lncRNAs in clinical samples (Cancer vs Normal) in accordance with their association to different types of chromatin loopings.
