# Supplementary material for: An AR-ERG transcriptional signature defined by long-range chromatin interactomes in prostate cancer cells
Source: PubMed Central journal article supplement — Genome Res. 2019 Feb;29(2):223–35. doi: 10.1101/gr.230243.117 (PMC6360806; doi:10.1101/gr.230243.117), 2019-02
Supplement: supp_gr.230243.117_Supplemental_Fig_S18.pdf [file supp_gr.230243.117_Supplemental_Fig_S18.pdf]

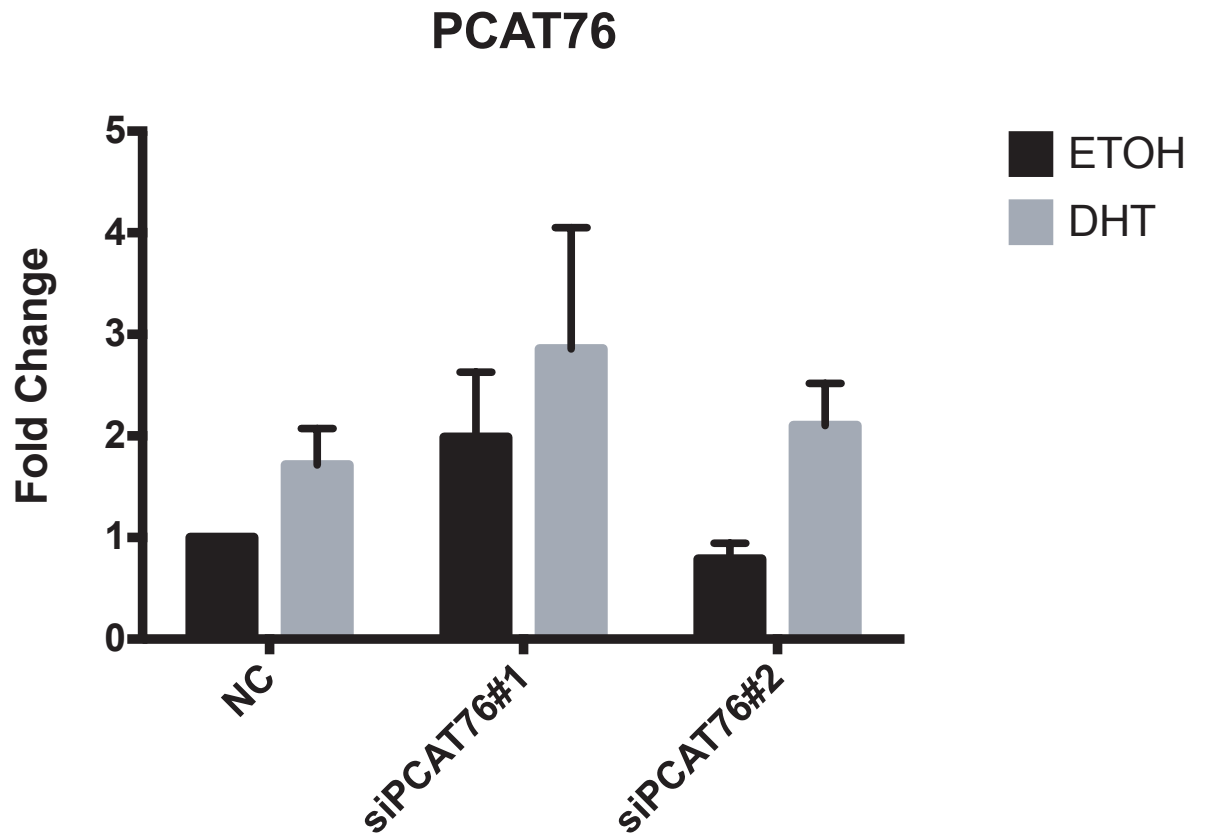

Figure S18: VCaP cells were transfected with 2 siRNA targeting PCAT76 and siControl (NC). The bar graph shows the expression of PCAT76 after treating with 10nM of DHT or ETOH. No significant reduction in PCAT76 expression was observed after siRNA mediated knock-down.
