# Supplementary material for: An AR-ERG transcriptional signature defined by long-range chromatin interactomes in prostate cancer cells
Source: PubMed Central journal article supplement — Genome Res. 2019 Feb;29(2):223–35. doi: 10.1101/gr.230243.117 (PMC6360806; doi:10.1101/gr.230243.117), 2019-02
Supplement: supp_gr.230243.117_Supplemental_Fig_S19.pdf [file supp_gr.230243.117_Supplemental_Fig_S19.pdf]

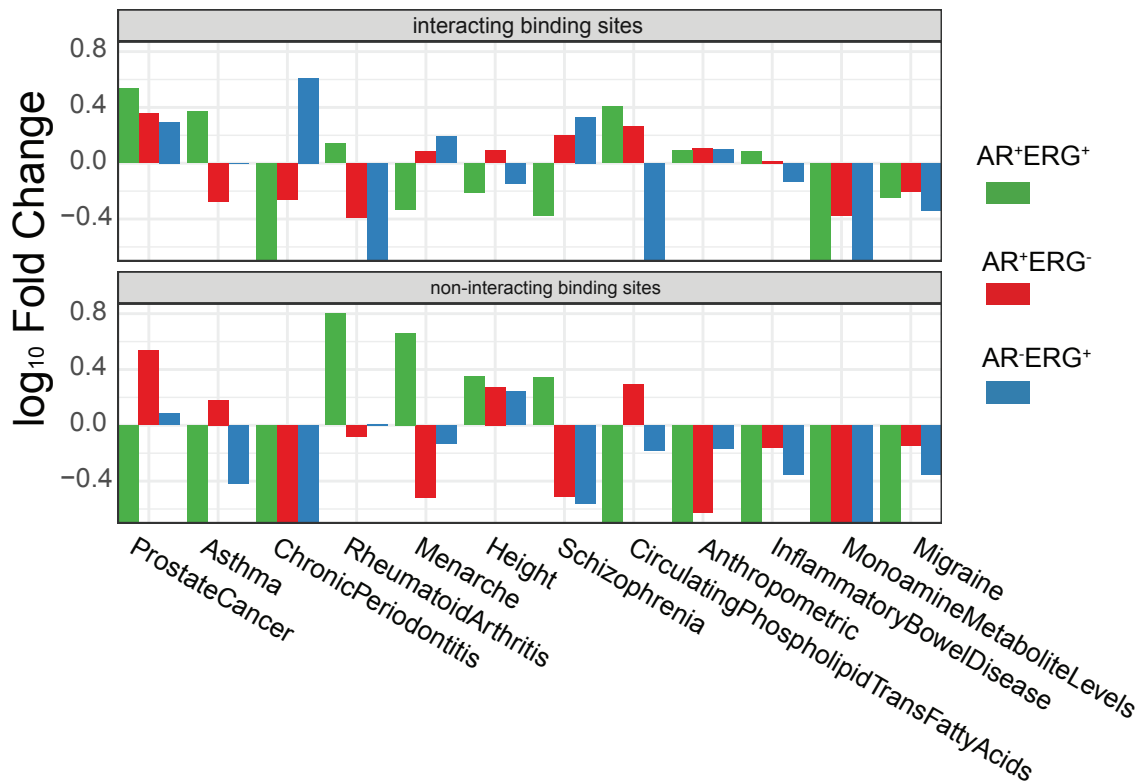

Figure.S19: This is the fold change enrichment version of Fig.6a. The enrichment of different classes of AR/ERG binding sites in diverse GWAS traits. Upper panel: Considering the regions with AR/ERG chromatin looping, and further breaking down to AR-ERG co-binding sites (green), AR only binding sites (red), and ERG only binding sites(blue) overlapping GWAS top loci. Lower panel: similar to upper panel, but considering only regions without AR/ERG chromatin looping.
