# Supplementary material for: An AR-ERG transcriptional signature defined by long-range chromatin interactomes in prostate cancer cells
Source: PubMed Central journal article supplement — Genome Res. 2019 Feb;29(2):223–35. doi: 10.1101/gr.230243.117 (PMC6360806; doi:10.1101/gr.230243.117), 2019-02
Supplement: supp_gr.230243.117_Supplemental_Fig_S20.pdf [file supp_gr.230243.117_Supplemental_Fig_S20.pdf]

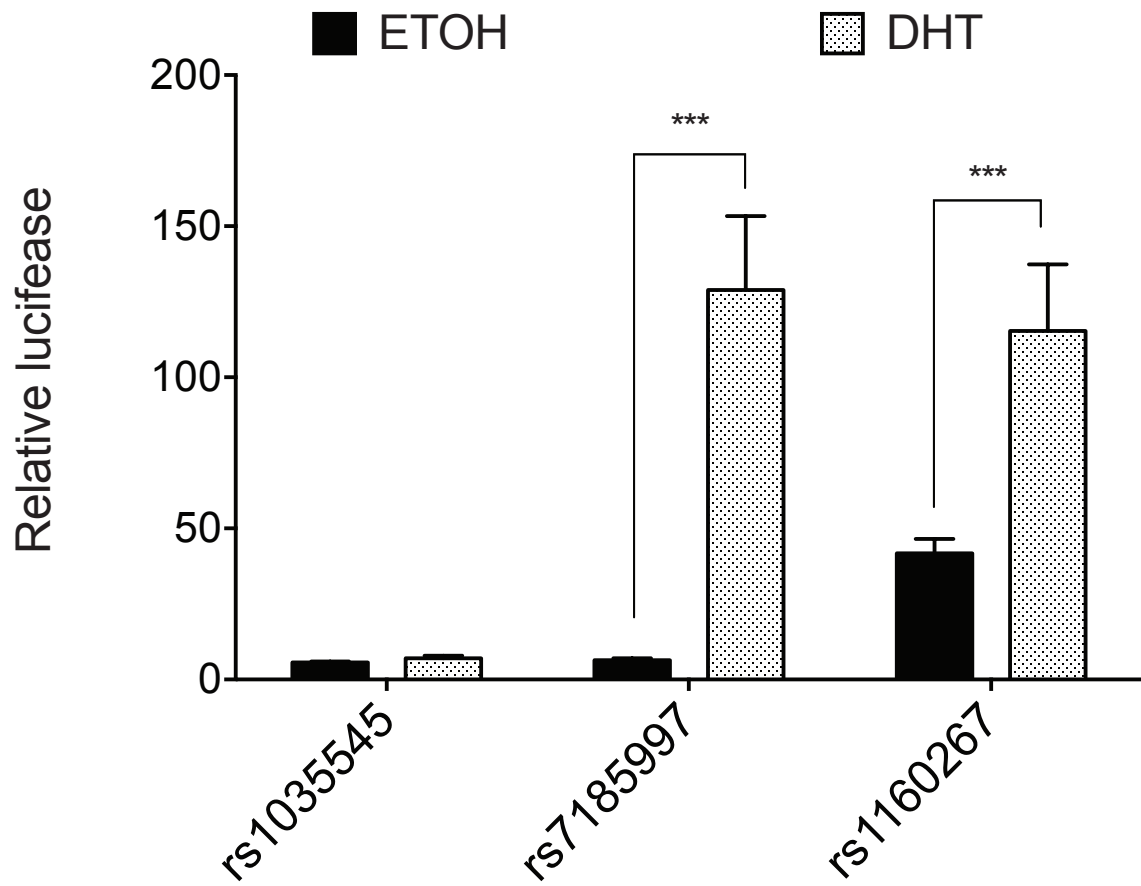

Figure S20: Prostate cancer associated GWAS SNP region was cloned into pGL4-TATA vector and transfected into VCaP cells. The luciferase activity was measured after treating with ETOH or DHT for 24 hours.
