# Supplementary material for: An AR-ERG transcriptional signature defined by long-range chromatin interactomes in prostate cancer cells
Source: PubMed Central journal article supplement — Genome Res. 2019 Feb;29(2):223–35. doi: 10.1101/gr.230243.117 (PMC6360806; doi:10.1101/gr.230243.117), 2019-02
Supplement: supp_gr.230243.117_Supplemental_Fig_S21.pdf [file supp_gr.230243.117_Supplemental_Fig_S21.pdf]

## AR binding sites (VCAP) overlapping with PCGEM1 binding sites (LNCAP)

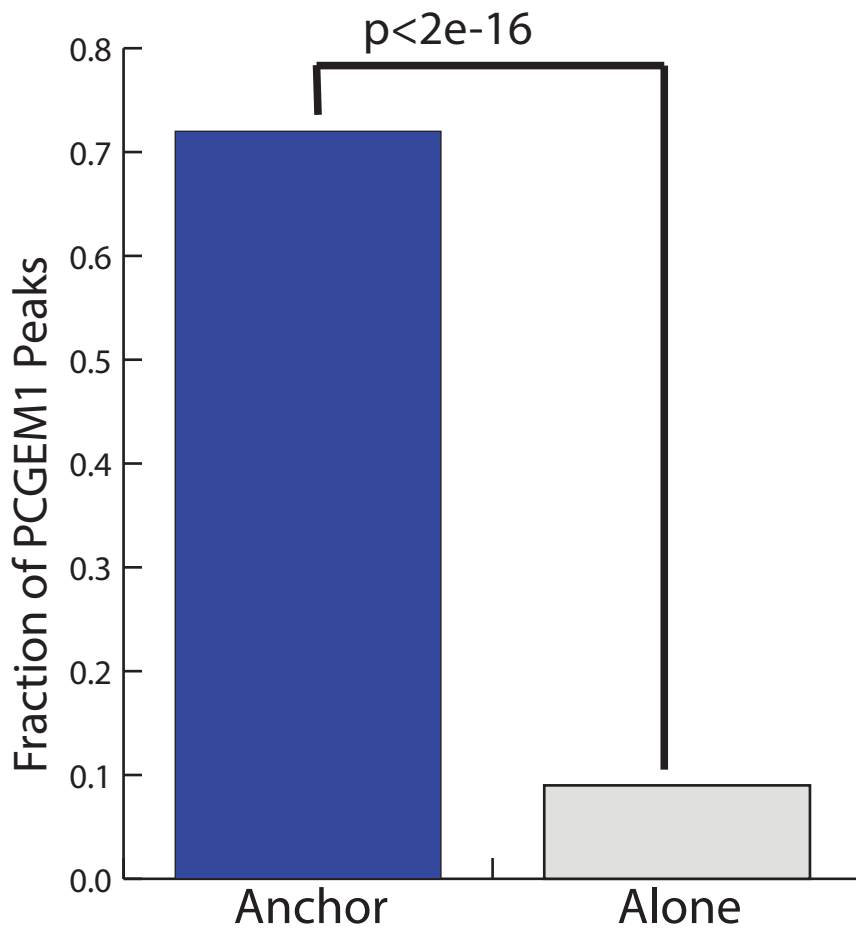

Figure.S21: Overlapping fraction between PCGEM1 binding sites and AR binding sites. The p-value is from fisher exact test, and the alternative hypothesis is the interacting binding sites overlapping more PCGEM1 binding sites than non-interacting binding sites.
