# Supplementary material for: An AR-ERG transcriptional signature defined by long-range chromatin interactomes in prostate cancer cells
Source: PubMed Central journal article supplement — Genome Res. 2019 Feb;29(2):223–35. doi: 10.1101/gr.230243.117 (PMC6360806; doi:10.1101/gr.230243.117), 2019-02
Supplement: supp_gr.230243.117_Supplemental_Fig_S22.pdf [file supp_gr.230243.117_Supplemental_Fig_S22.pdf]

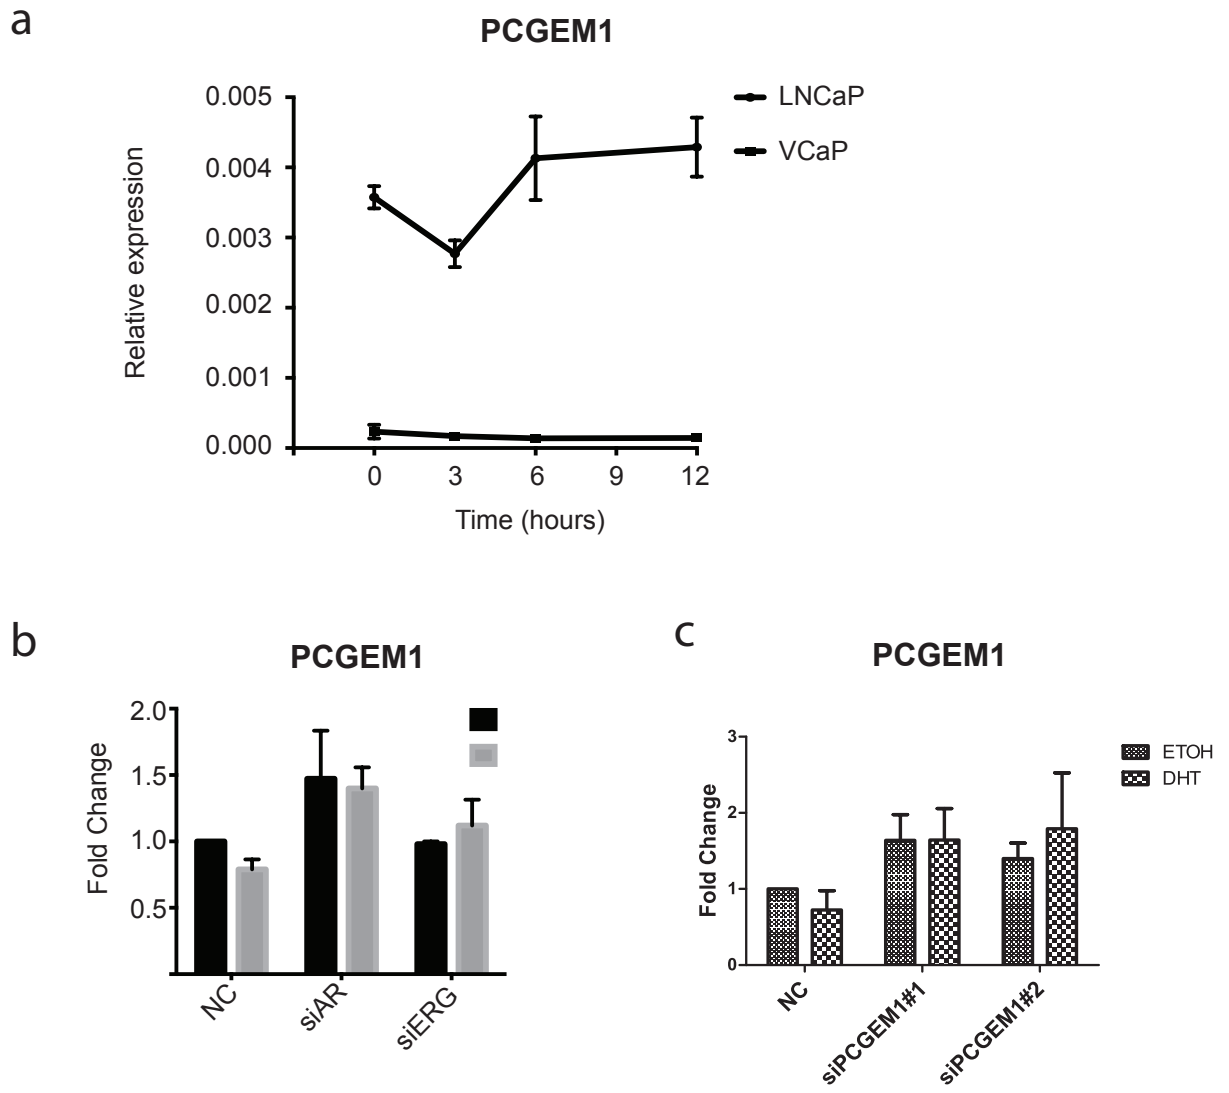

Figure.S22: a) the graph showing the relative expression of PCGEM1 in LNCaP and VCaP cells treated with 10nM of DHT for indicated time point shown PCGEM1 expression is minimal in VCaP cells compared to LNCaP cells. Bar graph shows PCGEM1 expression in VCaP cells treated with b) siNC (control), siAR or siERG and c) with two different siRNA against PCGEM1 and siNC shows no reduction in PCGEM1 expression.
