# Supplementary material for: An AR-ERG transcriptional signature defined by long-range chromatin interactomes in prostate cancer cells
Source: PubMed Central journal article supplement — Genome Res. 2019 Feb;29(2):223–35. doi: 10.1101/gr.230243.117 (PMC6360806; doi:10.1101/gr.230243.117), 2019-02
Supplement: supp_gr.230243.117_Supplemental_Fig_S23.pdf [file supp_gr.230243.117_Supplemental_Fig_S23.pdf]

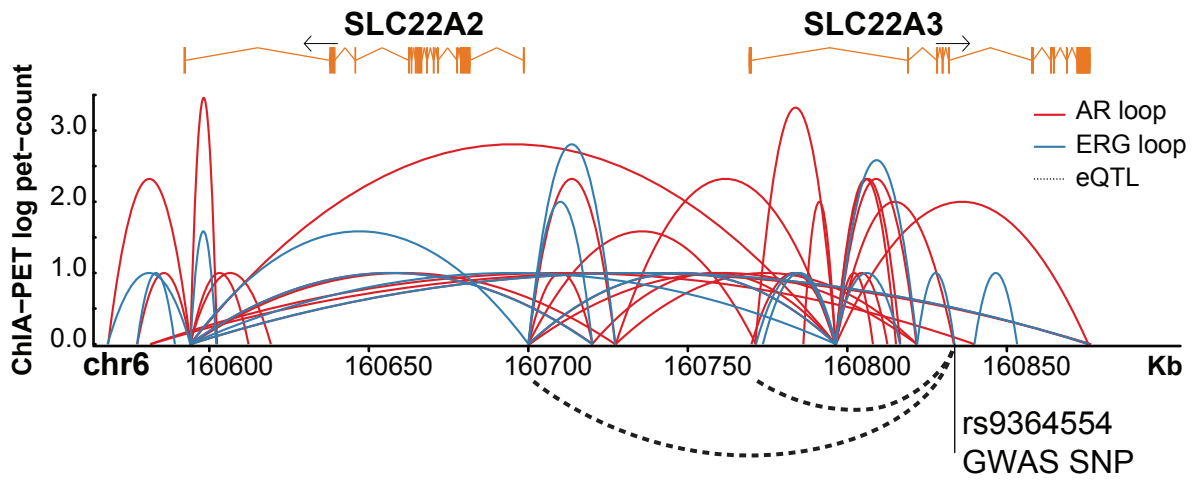

Figure. S23 Prostate cancer associated GWAS locus SLC22A3 is linked to SLC22A2 through AR/ERG chromatin looping.

Upper panel: the chromatin looping (AR:red, ERG:blue) on the region chr6: 160563700-160904407. Lower panel: two eQTL links (black) from GWAS SNP rs9364554
