# Supplementary material for: An AR-ERG transcriptional signature defined by long-range chromatin interactomes in prostate cancer cells
Source: HighWire-hosted journal article supplement (doi:10.1101/gr.230243.117), 2019-01-03
Supplement: Supplemental_Methods.docx [file Supplemental_Methods.docx]

**Fluorescence in-situ Hybridization (FISH)**

For the intra-chromosomal interactions, P1 and P2 are BAC probes targeting the two anchors of the interaction complex with more than 1 Mb distance. P3 is a control BAC probe at the same distance to one of the two anchors. For the inter-chromosomal interactions, P1 and P2 are the test BAC probes, each targeting one chromosomal location while P3 targets a chromosomal location on a different chromosome. FISH experiments with the combined probes of P1/P2 and P2/P3 were done in VCaP cells treated with EtOH and DHT for 2 h. 50-200 nuclei were analyzed in each FISH experiment, depending on the interaction rate, and all spots in each nucleus were counted. When the two loci are interacting, the two probes co-localize, and the red and green spots overlap (ET: P1/P2 and DT: P1/P2) to generate a yellow section. The overlap rate is normalized using the control probe pair (P2/P3) which indicates background noise. The normalized overlap rates were tested by Fisher’s Exact Test.

**SV calling with published ChIP-PET data**

SurVeyor v1.0 (in-house tool, can be downloaded from <http://biogpu.ddns.comp.nus.edu.sg/SurVeyor/>) was used to process the ChIP-PET data published by(Yu et al. 2010) [GSE14092].

Below are the specific settings of the SV calling.

Settings:

refGenome = hg19.fa

minClusterReads = 0

minSclipLen = 10

minMapQ = 0

minCtgMapQ = 0

seqErrRate = 0.05

nThreads = 20

readLength = 111

memoryFriendly = 0.05

debugMode = N

**Reasons for choosing genome reference hg19 over GRCh38**

When this project started at 2012, GRCh38 was not available and the regulatory annotation we used like Encode, TF-ChIPseq based on hg19. This was the primary reason reference genome hg19 was used.

Based on the following reasons mentioned below, we think GRCh38 will **not** significantly affect our conclusions;

a. In general, the change between GRCh38 and hg19 are less than 1%.

b. The main improvement GRCh38 is the better resolution of repetitive region and structure variants. In our analysis, we have applied experimental G-PET data to filter potential structure variants and repetitive region before the downstream ChIA-PET analysis, which minimize the impact of those.

c. Most of conclusions were drawn by the transcription factors binding sites and nearby functional elements(<100kbp). Their relative positions are unlikely to be changed between hg19 and GRCh38.

**ChIA-PET Library Data Processing**

Non-redundant PET sequence reads were ﬁrst analyzed for linker barcode composition and identiﬁed as sequences with hetero-dimer AB linker derived from nonspeciﬁc ligation products, or sequences with homo-dimer AA or BB linker derived from speciﬁc ligation products. The full-length linkers (AA/BB) resulting from intra-molecular circularization were considered to be non-chimeric PETs. Conversely, the heterozygous full linkers (AB/BA) resulting from intermolecular ligation were considered to be ligation noises. The biotin-labelled PET constructs were amplified and subjected for sequencing analysis. The linker composition information was used later for noise analysis. Then, the linker sequences were trimmed, and the PET tag sequences were mapped to the human reference genome (hg19). To further remove possible redundant PET sequences after genome mapping, the PETs with genomic locations from both head and tail tags within 2bp were merged to further reduce the library sequence redundancy arising from clonal PCR ampliﬁcation. This step takes into account any Single Nucleotide Polymorphisms (SNPs) between the reference and the test genome and sequencing errors that may have occurred and resulted in a 1bp or 2bp difference in the tag sequences.

Using the mapping criteria defined above, the uniquely mapped, non-chimeric PETs were used for further classification as inter-chromosomal, intra-chromosomal and self-ligation PETs. Inter-chromosomal PETs were defined as the head and tail of the PETs mapped onto different chromosomes. Intra-chromosomal PETs were defined as the head and tail of the PETs mapped onto the same chromosome with a genomic distance of 8kbp. Self-ligation PETs were defined as the head and tail of the PETs mapped onto the genome within 8kbp and represented ChIP DNA self-circularization. The span distance cut-off between self-ligation and intra-chromosomal intermolecular ligation PETs was determined using log-log plot analysis of the span distribution on the PET mapping. A clustering approach was used to identify specific chromatin interactions. On the basis of sonicated chromatin fragment sizes, individual PET mapping locations were extended to 1.5kbp and the PETs that overlapped at both ends formed interaction PET clusters. We adopted the hypergeometric model for P-value calculations. Such a model takes into consideration the tag counts from both the anchor regions and the sequencing depth to determine reliable interactions, and a false discovery rate cutoff of 0.05 was used. Finally, we performed random shuffling simulations to evaluate the correlation between noise level and PET cluster counts. The simulation broke down the pairing relationship of different PET clusters and the tags were randomly paired to generate simulated PETs.

The coverage of all self-ligation PET sequences across the genome reﬂects the enrichment by AR/ERG ChIP on speciﬁc locations, similar to ChIP-seq mapping for protein binding sites. Using a similar method as that of the ChIP-seq peak calling program MACS(Zhang et al., 2008), we performed peak calling on the self-ligation PET data. The local summits of the sequence coverage were called as potential peaks. The signiﬁcances of the potential peaks were estimated with p-values from a Poisson distribution. The background parameters in the Poisson distribution were estimated from the maximum of the global tag density, tag density in a 10 kb window around the peak, and the tag density in a 20 kb window around the peak. The p-value was corrected as false discovery rate (FDR) with the Benjamini-Hochberg (B-H) method for multiple hypothesis testing. The criteria for our ﬁnal peaks were that 1) the sequence coverage is at least 5 and 2) the FDR is smaller than 0.0001.

To avoid the artifact from the structure variation, we combined the SV calling result from our G-PET data and the published ChIP-PET data and retained the ChIA-PET interactions without overlapping those SVs as the true long-range chromatin interaction and used those filtered set for the follow-up analysis. Concretely, some chromatin loops are filtered if they overlap with +/-20kbp of the breakpoint pairs (Deletions, inversions, insertions, tandem and translocations) or they have at least one end overlapping the amplified regions. The binding sites overlapping with amplified regions are also filtered before further downstream analysis.

**Defining interaction anchor, binding sites with looping and without looping**

The ChIA-PET tool calls the binding sites (peaks) and the loops (inter-ligation cluster) independently. Interaction anchor region is defined as one end of a looping called by ChIA-PET tool, which usually contain one or more binding sites. In this paper, we used our previous published ChIP-seq peaks for AR and ERG as binding sites estimation. And we confirmed that ChIP-seq derived binding sites is highly consistently with the self-ligation peaks derived from ChIA-PET.

Given a list of ChIP-seq peak regions of a TF, we defined the interacting binding sites (BSanchor) as if those peaks overlapped with at least one anchor regions (i.e., one end of the chromatin looping) defined by inter-ligation PET in the same ChIA-PET library. The non-interacting binding sites (BSalone) are all the peaks not in the above category.

Defining Complex Interaction and Duplex Interaction

To study the organization of chromatin loops, we follow our previous ER ChIA-PET paper(Fullwood et al. 2009) to define duplex interaction and complex interaction as follow: Each of these loops identiﬁed by PET clusters is also termed as a duplex interaction because each of them involves a pair of interacting anchors. The duplex interactions are further collapsed based on the connectivity of overlapping anchors with other duplex interactions to form complex interactions.

**Defining Target Genes of an Interaction Binding Site (BSanchor)**

A gene will be defined as target gene of a given binding site, if that binding site can connect to the promoter (+/-2kbp of TSS) of that gene by no more than 2 chromatin loops from either AR ChIA-PET or ERG ChIA-PET. The reason to allow 2 chromatin looping instead of directly linking binding site to target gene’s promoter, is that, ChIA-PET may miss some true interactions due to the sequencing depth, and we tested that two chromatin looping connectivity definition has good balance between false negative and false positive. The reason to choose +/-2kbp of TSS is that the current ChIA-PET technology cannot distinguish self-ligation looping or other long-range looping for span less 5kbp (that is +/- 2.5kbp), so we set +/-2kbp to include the regulatory regions too close to have directly ChIA-PET looping to the target gene TSS.

**Transcription Models from AR (or ERG) Peaks and Chromatin looping**

To study different types of chromatin interactions, we follow a similar approach as our previous POL2RA ChIA-PET (Guoliang Li et al., 2012), which proposes three types of transcription models: basal promoter (BP), single gene (SG), multigene (MG). Precisely, with the high-conﬁdence AR(or ERG) peaks and interaction PET clusters, we deﬁned three transcription models based on how the genes were involved in the interaction regions. For genes whose promoter and gene body overlapped with standalone AR (or ERG) peaks only, they are called BP models. For genes that overlap with interacting binding sites, if the corresponding looping do not overlap with other genes, they are called SG interaction models; otherwise, a set of genes are associated through looping and they are called MG interaction models.

To assign genes to different AR (or ERG) interaction categories, we follow the logic flow as described in **Figure S18**. That is, we first assign gene to AR-ERG co-associated looping first then other types of looping and next to standalone binding categories. Hence, the genes in each interaction categories are non-overlapping.

Comparison of interacting (Anchor) and non-interacting (Alone) binding sites

Some binding sites associate with looping while some do not. To study their differences, we split the binding sites into two groups: interacting binding site (BSanchor) and non-intearcting binding site (BSalone) as stated before.

In general, BSanchor has higher ChIP intensity and motif percentage than BSalone. To avoid this bias, we took the top 10k of BSanchor sorted by the ChIP-intensity. Suppose the motif percentage of the top 10k BSanchor is p. Then, we determine N such that the motif percentage in the top N BSalone sorted by the ChIP-intensity is also p. Below, we performed different association studies using these two sets of comparable binding sites. In such way, we identified 390 ARBSalone and 3043 ERGBSalone comparable to top 10k ARBSanchor and ERGBSanchor respectively.

In this study, the occurrences of motifs are determined by scanning the AR/ERG motif +/-200bp around the ChIP-seq peak summit, with FDR 0.001. We use V$AR_01 and V$CETS1P54_01 motifs from TRANSFAC(Wingender, 2008) v11.3 for AR and ERG respectively.

**Association with Histone Modiﬁcation and Transcription Factor ChIP-seq Data**

To study the histone features of each category (anchor/alone) of AR/ERG binding sites, we obtained the histone mark and Pol2 ChIP-seq data from previous literature(Yu et al., 2010) (GEO accession GSE14092). We mapped the raw read ChIP-seq data to reference genome (hg19) and compute their coverage around each category (anchor/alone) of AR (or ERG) binding sites.

To study the association between each category (anchor/alone) of AR (or ERG) binding sites and the co-repressors EZH2,HDAC1,HDAC2,HDAC3, we obtained the ChIP-seq data of these four co-repressors from our previous publication(Chng et al., 2012) (GEO accession GSE28950) . For co-repressors, ChIP-seq data, we mapped the raw reads to the reference genome (hg19) and use MACS(Zhang et al., 2008) to obtain the binding sites for each co-repressors. The binding sites of co-repressors were overlapped with each category (anchor/alone) of AR (or ERG) binding sites to infer their association. Moreover, the number of AR (or ERG) loops associated with each co-repressor binding sites is computed by counting the number of interacting AR (or ERG) anchor regions overlapping with the target co-repressor binding sites.

The overlapping between two peaks regions is defined if the centers of the two regions are less than 500bp, and we use the distance between centers instead of original peak regions because the width of peaks vary between different of peak categories.

The enrichment of overlapping counting is to compare with the expected overlapping fraction given the same annotation (histone mark or TF binding sites) using combined ENCODE2 DNase regions as control. A binomial p-value is calculated given the expected overlapping fraction (using DNase regions) and observed overlapping count and total region count in each category. The final enrichment is negative log p-value.

**Defining Promoter and Enhancer Region**

We defined promoter and enhancer region by utilizing ChromHMM(Ernst and Kellis 2012) with six distinct histone marks (H3K36me3, H3K4me1, H3K27ac, H3K4me3, H3K27me3, H3K9me3), which define the various chromatin states: (Quiescent, non-transcribed regions with very little epigenetic signal (Quies), Transcribed region (Tx), Active Promoter (TSS) and Active Enhancer (Enh)). In detail, we applied 18-state ChromHMM joint model n the epigenome roadmap project. And we collapsed all the chromatin states naming containing “Enh” as Active Enhancer (Enh) and similarly collapsed all the chromatin states containing “Tx” as Transcribed region (Tx). For Active Promoter (TSS), we collapsed all the chromatin states containing “Tss” but not containing “Biv”. And “Quiescent” state is the same as “Qiues” state in the 18 state ChromHMM model.

**Defining Hub and Non-hub Region**

Some AR or ERG binding sites are associated with many loops. To study the functional significance of these binding sites, we defined these binding sites as hub regions if they are the top 1% binding sites with the highest number of AR (or ERG) looping in AR (or ERG) network. The remaining 99% binding sites are considered as non-hub interacting regions.

**AR/ERG mediated Gene Network Analysis**

To construct an AR and/or ERG mediated gene network, a pair of genes are connected if their promoters are linked through AR or ERG long range interactions. Due to ChIA-PET may miss some true interaction at the current sequencing depth, we allowed one indirect looping, i.e. two genes are connected if their promoters have chromatin looping to the same enhancer.

Each edge was annotated as AR-ERG co-associated looping if both AR and ERG ChIA-PET defined the looping linking two nodes independently, or as AR or ERG unique looping if the looping linking two nodes only captured by either AR or ERG ChIA-PET. Each node was annotated using the UCSC Genes annotations (downloaded 5 June, 2013).

**Pearson Correlation Coefficient Analysis for Co-expression**

To determine if two genes are co-expressed, we compute the Pearson Correlation Coefficient (PCC) of the expressions of the two genes in the DHT induced time course data (4 time points) generated from VCaP cell-line (GEO accession: GSE28948).

**Collection of GWAS Risk Loci**

The prostate cancer GWAS loci were obtained from the **Supplemental Table.16** (100 SNPs) of Al Olama AA et.al (Al Olama et al., 2014), and we selected other 11 GWAS traits from NIH GWAS catalog which have similar number of risk loci (90-200) for comparison. To account for possible causal SNPs are not tagged in the original genotyping platform, we included the SNPs with high LD (1000 genome phase 1 version 2 EUR r2>0.9) with the GWAS reported SNPs.

**GWAS Enrichment of different categories of AR/ERG binding sites**

To estimate the enrichment of each class of binding sites, we computed the overlapping count between the selected class of binding sites and the GWAS SNPs. We created the null distribution of overlapping count by 1000,000 sampling of the same number of SNPs matching the LD size, MAF, TSS distance of the GWAS SNPs. Precisely, we discretized each confounder (i.e., LD size, MAF, TSS distance) into 10 bins using quartile, so that each SNP will fall into one of 10^3 bins, and did resampling for control SNPs within each bin. The final enrichment of Z-score is computed by the true overlapping count and the sampling control overlapping count.

**GWAS Pathway Enrichment analysis**

We constructed two sets of target genes for those GWAS loci: 1. the nearest protein-coding genes of those GWAS loci 2. The protein-coding genes within 20kbp of GWAS loci or the anchor region linked by GWAS loci through AR or ERG chromatin looping. Given these two sets of genes, we evaluated their pathway enrichment using Enrichr(Kuleshov et al., 2016) and KEGG Pathway 2016 database. The top 10 pathways of the second gene sets are below adjusted p-value 0.1 are selected in **Fig.6** The detail pathway enrichment result are reported in **Table S12**.

**References**

Al Olama, a. a., Kote-Jarai, Z., Berndt, S. I., Conti, D. V., Schumacher, F., Han, Y., … Haiman, C. a. (2014). A meta-analysis of 87,040 individuals identifies 23 new susceptibility loci for prostate cancer. *Nature Genetics*, *46*(10), 1103–1109. https://doi.org/10.1038/ng.3094

Chng, K. R., Chang, C. W., Tan, S. K., Yang, C., Hong, S. Z., Sng, N. Y. W., & Cheung, E. (2012). A transcriptional repressor co-regulatory network governing androgen response in prostate cancers. *The EMBO Journal*, *31*(12), 2810–23. https://doi.org/10.1038/emboj.2012.112

Core, L. J., Waterfall, J. J., & Lis, J. T. (2008). Nascent RNA sequencing reveals widespread pausing and divergent initiation at human promoters. *Science (New York, N.Y.)*, *322*(5909), 1845–8. https://doi.org/10.1126/science.1162228

Fullwood, M. J., Liu, M. H., Pan, Y. F., Liu, J., Han, X., Mohamed, Y. Bin, … Wei, C. (2010). An oestrogen receptor alpha-bound human chromatin interactome. *Nature*, *462*(7269), 58–64. https://doi.org/10.1038/nature08497.An

Heinz, S., Benner, C., Spann, N., Bertolino, E., Lin, Y. C., Laslo, P., … Glass, C. K. (2010). Simple Combinations of Lineage-Determining Transcription Factors Prime cis-Regulatory Elements Required for Macrophage and B Cell Identities. *Molecular Cell*, *38*(4), 576–589. https://doi.org/10.1016/j.molcel.2010.05.004

Kuleshov, M. V, Jones, M. R., Rouillard, A. D., Fernandez, N. F., Duan, Q., Wang, Z., … Ma’ayan, A. (2016). Enrichr: a comprehensive gene set enrichment analysis web server 2016 update. *Nucleic Acids Research*, *44*(W1), W90-7. https://doi.org/10.1093/nar/gkw377

Li, G., Fullwood, M. J., Xu, H., Mulawadi, F. H., Velkov, S., Vega, V., … Sung, W. K. (2010). ChIA-PET tool for comprehensive chromatin interaction analysis with paired-end tag sequencing. *Genome Biol*, *11*(2), R22. https://doi.org/10.1186/gb-2010-11-2-r22

Li, G., Ruan, X., Auerbach, R. K., Sandhu, K. S., Zheng, M., Wang, P., … Ruan, Y. (2012). Extensive promoter-centered chromatin interactions provide a topological basis for transcription regulation. *Cell*, *148*(1–2), 84–98. https://doi.org/10.1016/j.cell.2011.12.014

Tennakoon, C., Purbojati, R. W., & Sung, W. K. (2012). BatMis: A fast algorithm for k-mismatch mapping. *Bioinformatics*, *28*(16), 2122–2128. https://doi.org/10.1093/bioinformatics/bts339

Wingender, E. (2008). The TRANSFAC project as an example of framework technology that supports the analysis of genomic regulation. *Briefings in Bioinformatics*, *9*(4), 326–332. https://doi.org/10.1093/bib/bbn016

Xu, Q., Chen, L.-L., Ruan, X., Chen, D., Zhu, A., Chen, C., … Ruan, Y. (2012). The draft genome of sweet orange (Citrus sinensis). *Nature Genetics*, *45*(1), 59–66. https://doi.org/10.1038/ng.2472

Yu, J., Yu, J., Mani, R. S., Cao, Q., Brenner, C. J., Cao, X., … Chinnaiyan, A. M. (2010). An Integrated Network of Androgen Receptor, Polycomb, and TMPRSS2-ERG Gene Fusions in Prostate Cancer Progression. *Cancer Cell*, *17*(5), 443–454. https://doi.org/10.1016/j.ccr.2010.03.018

Zhang, Y., Liu, T., Meyer, C. A., Eeckhoute, J., Johnson, D. S., Bernstein, B. E., … Liu, X. S. (2008). Model-based analysis of ChIP-seq (MACS). *Genome Biol*, *9*, R137. https://doi.org/10.1186/gb-2008-9-9-r137
