# Supplementary material for: An AR-ERG transcriptional signature defined by long-range chromatin interactomes in prostate cancer cells
Source: HighWire-hosted journal article supplement (doi:10.1101/gr.230243.117), 2019-01-03
Supplement: Supplemental_Table_S1.xlsx [file Supplemental_Table_S1.xlsx]

## Sheet: ARnoSV.bedpe
Table.S1: The significant long-range Chromatin interactions of AR in VCaP cell. Each row represents one long range interaction. Columns 1-3 are the genomic coordinates of 1st anchor; Columns 4-6 are the genomic coordinates of 2nd anchor; The 7th column is the pair-end read counts across two anchors.
anchor1_Chrom	anchor1_start	anchor1_end	anchor2_Chrom	anchor2_start	anchor2_end	PET count
Chr1	1735576	1736172	Chr1	1747409	1747910	2
Chr1	1747131	1748030	Chr1	1826494	1827457	2
Chr1	1747140	1747966	Chr1	1760574	1761413	3
Chr1	1747147	1748016	Chr1	1788747	1789493	5
Chr1	1747160	1748058	Chr1	1789699	1790646	9
Chr1	1747463	1748020	Chr1	1772778	1773358	2
Chr1	1760539	1761560	Chr1	1788522	1790608	11
Chr1	1760546	1761578	Chr1	1772698	1773623	5
Chr1	1772983	1773622	Chr1	1788711	1790244	6
Chr1	1785197	1785874	Chr1	1823953	1824481	2
Chr1	1788589	1789774	Chr1	1975317	1975971	3
Chr1	1788874	1789467	Chr1	209918208	209918935	2
Chr1	1932969	1933601	Chr1	1975260	1975848	2
Chr1	2179665	2180523	Chr6	64202062	64202683	2
Chr1	2179667	2180235	Chr1	2217899	2218853	3
Chr1	2187516	2188097	Chr1	2218180	2218771	2
Chr1	2322616	2323754	Chr1	2342006	2342775	3
Chr1	2342042	2342634	Chr1	2711970	2712829	2
Chr1	2342088	2342784	Chr1	2385027	2386009	3
Chr1	2711816	2712413	Chr1	2884467	2885134	2
Chr1	2879388	2879986	Chr1	2900633	2901421	2
Chr1	2884518	2885127	Chr1	3309311	3309988	2
Chr1	2963418	2963992	Chr1	3309363	3310237	2
Chr1	3129850	3130418	Chr1	3188447	3189039	2
Chr1	3135662	3136340	Chr1	3275090	3276063	2
Chr1	3188220	3188937	Chr1	3250439	3251150	2
Chr1	3188424	3188979	Chr1	3309476	3310032	2
Chr1	3250224	3250918	Chr1	3318707	3319296	2
Chr1	3251714	3252359	Chr1	3309590	3310370	2
Chr1	3268980	3269711	Chr1	3309222	3310025	2
Chr1	3309238	3310021	Chr1	3318556	3319337	2
Chr1	3565144	3565644	Chr21	27263840	27264622	2
Chr1	3667301	3668189	Chr1	3684349	3685043	2
Chr1	4642795	4643606	Chr1	4656846	4657525	2
Chr1	4656724	4657849	Chr1	4674007	4675076	7
Chr1	4663191	4663743	Chr1	4674206	4674900	2
Chr1	4708978	4709812	Chr1	5647040	5647795	2
Chr1	4709008	4709871	Chr1	4837453	4838341	4
Chr1	4716146	4716868	Chr1	4886275	4886778	2
Chr1	4770700	4771282	Chr1	4813877	4814805	2
Chr1	4789928	4790847	Chr1	4837382	4838053	6
Chr1	4790181	4790693	Chr1	4814161	4814797	2
Chr1	4808749	4809334	Chr1	4837346	4838273	3
Chr1	4813944	4814854	Chr1	4837268	4838087	4
Chr1	4837355	4838044	Chr1	4857842	4858616	2
Chr1	4837392	4838116	Chr1	5554652	5555192	2
Chr1	4890411	4891388	Chr1	4902533	4903331	2
Chr1	4941404	4941919	Chr1	4956922	4957822	2
Chr1	5160067	5160717	Chr1	5169533	5170168	2
Chr1	5468906	5469958	Chr1	5554048	5555125	3
Chr1	5468957	5469835	Chr1	5646589	5647482	4
Chr1	5482456	5483109	Chr1	5554547	5555241	3
Chr1	5482661	5483192	Chr1	5507211	5507894	2
Chr1	5490694	5491645	Chr1	5554299	5555234	4
Chr1	5507215	5508079	Chr1	5553951	5555108	7
Chr1	5545486	5546040	Chr1	5554393	5555256	2
Chr1	5553790	5555217	Chr1	5786960	5787984	7
Chr1	5554064	5554820	Chr1	5628017	5628588	2
Chr1	5554238	5555080	Chr6	34570229	34571077	2
Chr1	5554300	5555226	Chr1	5646840	5647632	3
Chr1	5554453	5555015	Chr1	5658010	5658817	3
Chr1	5554617	5555198	Chr1	6031983	6032651	2
Chr1	5570072	5570666	Chr1	5680712	5681325	2
Chr1	5611310	5612288	Chr1	5787396	5787924	2
Chr1	5611331	5612276	Chr1	5645710	5646238	2
Chr1	5611374	5612338	Chr1	5646435	5647523	5
Chr1	5611420	5612357	Chr1	5657898	5658821	3
Chr1	5628042	5628768	Chr1	5787059	5787821	2
Chr1	5646705	5647266	Chr1	5787050	5787779	2
Chr1	5657928	5658598	Chr1	5786941	5787567	2
Chr1	5748226	5749115	Chr1	5786610	5787945	5
Chr1	5784596	5785386	Chr1	6015628	6016382	2
Chr1	5786984	5787667	Chr22	33248543	33249441	2
Chr1	5860541	5861202	Chr5	907125	907645	2
Chr1	6015440	6016536	Chr1	6034904	6035635	3
Chr1	6015471	6016410	Chr1	6031791	6032629	3
Chr1	6031823	6032725	Chr1	6046169	6047054	2
Chr1	6034902	6035458	Chr1	6047809	6048334	2
Chr1	6046220	6047033	Chr1	6066808	6067404	2
Chr1	6102202	6102896	Chr1	6217705	6218484	2
Chr1	6112653	6113295	Chr1	6319481	6320241	2
Chr1	6150903	6151547	Chr1	6217653	6218561	3
Chr1	6217706	6218562	Chr1	6319289	6320239	4
Chr1	6218308	6218809	Chr5	25448359	25448859	2
Chr1	6319311	6320195	Chr1	6376601	6377703	3
Chr1	6319323	6320239	Chr1	6403497	6404242	3
Chr1	6319371	6320247	Chr1	6354858	6355767	4
Chr1	6319544	6320274	Chr1	6369436	6370015	3
Chr1	6911071	6911619	Chr1	6945431	6946416	2
Chr1	6923075	6923711	Chr1	6970135	6970844	2
Chr1	6945430	6946318	Chr1	7016189	7016980	2
Chr1	6945442	6945973	Chr1	7028431	7029106	2
Chr1	6945752	6946407	Chr1	6970479	6971106	3
Chr1	6970265	6971212	Chr10	31550702	31551461	2
Chr1	6970292	6971094	Chr1	7030576	7031457	2
Chr1	7014216	7014733	Chr1	7030484	7031045	2
Chr1	7016322	7017195	Chr1	7028661	7029227	2
Chr1	7016390	7017031	Chr1	7030379	7031161	2
Chr1	7018289	7019546	Chr1	7030265	7030929	3
Chr1	7018766	7019843	Chr1	7028477	7029240	3
Chr1	7018812	7019674	Chr1	7709045	7709665	2
Chr1	7020240	7021349	Chr1	7028475	7029435	4
Chr1	7020426	7021757	Chr1	7030101	7031625	6
Chr1	7028498	7029218	Chr1	7054281	7054980	2
Chr1	7028681	7029292	Chr1	7708666	7709471	2
Chr1	7111627	7112149	Chr1	7258803	7259568	2
Chr1	7570416	7571021	Chr1	8031068	8031855	2
Chr1	7570431	7571400	Chr1	7708675	7709625	3
Chr1	7708662	7709270	Chr5	177425495	177426424	2
Chr1	7708716	7709260	Chr1	7805638	7806579	3
Chr1	7708793	7709520	Chr1	8031006	8031690	2
Chr1	7727477	7728227	Chr1	7812695	7813201	2
Chr1	7776908	7778519	Chr1	7805694	7806557	7
Chr1	7781200	7782217	Chr1	7805712	7806516	4
Chr1	7786649	7787155	Chr1	7805675	7806546	2
Chr1	7797146	7797758	Chr1	7805255	7806141	2
Chr1	7805830	7806489	Chr1	8031090	8031860	3
Chr1	7820120	7820880	Chr15	61027493	61028271	2
Chr1	7866783	7867905	Chr1	8030860	8031915	3
Chr1	7877540	7878478	Chr1	7950607	7951396	3
Chr1	7877621	7878282	Chr1	8030941	8031665	4
Chr1	8020582	8021570	Chr1	8030968	8031555	2
Chr1	8021695	8022470	Chr1	8030733	8031708	2
Chr1	8030761	8032172	Chr1	8318768	8320108	102
Chr1	8030769	8031873	Chr1	8309306	8310748	9
Chr1	8030812	8031963	Chr1	8249593	8250730	20
Chr1	8030841	8031795	Chr1	8086529	8087487	8
Chr1	8030851	8032014	Chr1	8472096	8473247	19
Chr1	8030862	8031832	Chr1	8402925	8404211	8
Chr1	8030866	8031710	Chr1	19941318	19942303	2
Chr1	8030868	8031829	Chr1	8484518	8485463	5
Chr1	8030873	8031578	Chr1	8375964	8377125	3
Chr1	8030876	8031834	Chr8	144231645	144232685	3
Chr1	8030885	8032017	Chr1	8359698	8360908	37
Chr1	8030888	8031875	Chr1	9061742	9062852	3
Chr1	8030888	8032182	Chr1	8371629	8373586	23
Chr1	8030924	8031569	Chr21	21725476	21726451	2
Chr1	8030965	8031827	Chr1	8064710	8065535	4
Chr1	8030967	8031857	Chr1	8130692	8131597	6
Chr1	8030982	8031911	Chr1	8049447	8050359	4
Chr1	8030993	8031961	Chr1	8326580	8327249	5
Chr1	8031023	8031783	Chr1	8229411	8230416	4
Chr1	8031085	8031806	Chr1	8242051	8243265	5
Chr1	8031107	8031943	Chr1	8301607	8302399	5
Chr1	8031172	8031783	Chr2	12201637	12202241	2
Chr1	8031178	8031855	Chr1	8526978	8527714	4
Chr1	8035314	8036807	Chr1	8359893	8360715	9
Chr1	8035365	8036650	Chr1	8372782	8373472	5
Chr1	8035378	8036831	Chr1	8318678	8319892	12
Chr1	8035429	8036159	Chr1	8377886	8378800	2
Chr1	8035715	8036586	Chr1	8403354	8404199	5
Chr1	8035840	8036731	Chr1	8086959	8087554	3
Chr1	8035848	8036718	Chr1	8064817	8065814	3
Chr1	8035936	8036567	Chr1	8249867	8250616	2
Chr1	8036098	8036604	Chr1	8526952	8527642	2
Chr1	8064927	8065469	Chr1	8403342	8403893	2
Chr1	8065041	8065549	Chr1	8318899	8319859	2
Chr1	8066787	8067484	Chr1	8373024	8373712	2
Chr1	8074742	8075447	Chr1	8372607	8373170	2
Chr1	8086494	8088221	Chr1	8318845	8320399	12
Chr1	8086531	8087530	Chr1	8249752	8250563	5
Chr1	8086560	8087527	Chr1	8359855	8360443	3
Chr1	8086910	8087843	Chr1	8372490	8373557	8
Chr1	8091037	8091605	Chr1	8318855	8319746	2
Chr1	8091620	8092370	Chr1	8318780	8319878	3
Chr1	8108955	8109560	Chr1	8249774	8250746	4
Chr1	8108992	8109576	Chr1	8372084	8373042	2
Chr1	8113160	8113857	Chr1	8242322	8242827	2
Chr1	8113841	8114704	Chr1	8130325	8131641	3
Chr1	8130209	8131654	Chr1	8372378	8373199	4
Chr1	8130561	8131647	Chr1	8241973	8243151	8
Chr1	8130613	8131783	Chr1	8318833	8319981	20
Chr1	8130659	8131426	Chr1	8144121	8144786	3
Chr1	8130759	8131572	Chr1	8301659	8302316	2
Chr1	8130766	8131568	Chr1	8250002	8250736	2
Chr1	8130773	8131650	Chr1	8359727	8360664	4
Chr1	8143837	8144941	Chr1	8318912	8319722	3
Chr1	8143847	8144543	Chr1	8257614	8258198	2
Chr1	8143973	8144928	Chr1	8301355	8302031	4
Chr1	8144134	8144846	Chr1	8242320	8243068	3
Chr1	8229377	8230056	Chr1	8242199	8242771	3
Chr1	8229556	8230259	Chr1	8318931	8319764	3
Chr1	8234684	8235387	Chr1	8319168	8319917	3
Chr1	8241933	8243412	Chr1	8318828	8320488	22
Chr1	8241948	8242819	Chr1	8372606	8373512	5
Chr1	8242143	8243197	Chr1	8301501	8302405	4
Chr1	8242296	8243017	Chr13	109632792	109633391	2
Chr1	8249666	8250710	Chr1	8359754	8360690	7
Chr1	8249673	8250800	Chr1	8318833	8319971	41
Chr1	8249695	8250677	Chr1	8372390	8373545	7
Chr1	8249756	8250740	Chr1	8309758	8310782	7
Chr1	8249790	8250693	Chr1	8301408	8302396	5
Chr1	8257689	8258388	Chr1	8318969	8319840	3
Chr1	8257977	8258647	Chr1	8301533	8302454	4
Chr1	8258063	8258578	Chr1	8310069	8310722	2
Chr1	8301171	8302376	Chr1	8359696	8360390	6
Chr1	8301360	8302566	Chr1	8319027	8320331	23
Chr1	8301363	8302291	Chr1	8326478	8327139	2
Chr1	8301455	8302336	Chr1	8372188	8373479	5
Chr1	8301809	8302566	Chr1	8309802	8310696	2
Chr1	8303726	8305366	Chr1	8318919	8319654	9
Chr1	8304575	8305138	Chr1	8359755	8360480	2
Chr1	8309874	8310877	Chr1	8318871	8319899	16
Chr1	8309937	8310696	Chr1	8372689	8373488	2
Chr1	8309941	8310796	Chr1	8359835	8360672	5
Chr1	8318493	8319009	Chr1	8326664	8327567	2
Chr1	8318594	8320609	Chr1	8359609	8361087	67
Chr1	8318838	8319834	Chr1	8484497	8485393	4
Chr1	8318877	8320032	Chr1	8526812	8527775	4
Chr1	8318891	8320146	Chr1	8371921	8374523	48
Chr1	8318925	8319747	Chr1	8376335	8377479	3
Chr1	8318992	8319913	Chr1	8403240	8404148	3
Chr1	8319035	8319743	Chr6	34570426	34570941	2
Chr1	8319123	8319807	Chr4	77119276	77119956	2
Chr1	8319193	8319921	Chr7	89696095	89696983	2
Chr1	8326278	8327562	Chr1	8359848	8360959	6
Chr1	8326460	8327537	Chr1	8372225	8373542	5
Chr1	8326499	8327448	Chr1	8374065	8374570	2
Chr1	8329626	8330469	Chr1	8359923	8360886	2
Chr1	8359730	8360829	Chr1	8372080	8373885	31
Chr1	8360041	8360964	Chr1	8403369	8404513	3
Chr1	8372672	8373530	Chr1	8403458	8404392	2
Chr1	8372841	8373430	Chr1	8472315	8473116	3
Chr1	8373962	8374542	Chr1	8403279	8404164	2
Chr1	8403179	8404190	Chr1	8424305	8425099	6
Chr1	8408438	8409367	Chr1	8424297	8425094	4
Chr1	8424187	8425039	Chr1	8472359	8473160	3
Chr1	8424419	8425106	Chr1	8526697	8527764	3
Chr1	8432332	8432851	Chr1	8484754	8485380	2
Chr1	8450885	8451634	Chr1	8526900	8527666	2
Chr1	8472247	8473210	Chr1	8526793	8527793	9
Chr1	8472590	8473338	Chr1	8558580	8559364	4
Chr1	8484273	8485399	Chr1	8508949	8510100	4
Chr1	8484475	8485395	Chr1	8526337	8527708	16
Chr1	8498807	8499561	Chr1	8508884	8509739	3
Chr1	8508011	8509552	Chr1	8522907	8523764	4
Chr1	8508794	8509770	Chr1	8526362	8527729	8
Chr1	8512240	8513072	Chr1	8526838	8527685	2
Chr1	8526643	8527358	Chr1	9083887	9084395	2
Chr1	8526859	8527739	Chr1	8558457	8559453	3
Chr1	8527186	8527762	Chr4	74240890	74241844	2
Chr1	8662930	8663641	Chr1	8671906	8672627	2
Chr1	8671997	8672514	Chr1	8704175	8704826	2
Chr1	8672041	8672564	Chr15	22580069	22580738	4
Chr1	8672042	8672730	Chr1	8690027	8690609	2
Chr1	8679573	8680271	Chr1	8689997	8690523	2
Chr1	8690048	8690860	Chr1	8703899	8704842	3
Chr1	8730142	8730814	Chr1	8746461	8747628	3
Chr1	9007365	9007970	Chr1	9062075	9063065	2
Chr1	9061728	9062423	Chr20	59266051	59267002	2
Chr1	9061876	9062893	Chr1	9083946	9084777	4
Chr1	9061934	9062920	Chr1	9087186	9088070	3
Chr1	9062098	9062724	Chr1	9134881	9135710	2
Chr1	9083890	9084879	Chr1	9136000	9137000	3
Chr1	9086758	9087866	Chr1	9129935	9131252	5
Chr1	9087175	9088076	Chr1	9135999	9136938	4
Chr1	9285226	9286098	Chr1	9542876	9543678	2
Chr1	9301979	9302536	Chr1	9496206	9496998	2
Chr1	9330714	9331492	Chr1	9496039	9496608	2
Chr1	9352402	9352991	Chr1	9542758	9543547	2
Chr1	9429488	9430071	Chr1	9543263	9543832	2
Chr1	9429627	9430455	Chr1	9496007	9496906	3
Chr1	9429823	9430426	Chr1	9498009	9498515	2
Chr1	9437093	9437690	Chr1	9497813	9498632	3
Chr1	9444755	9445387	Chr1	9542805	9543614	3
Chr1	9444885	9445514	Chr1	9495924	9496991	3
Chr1	9495934	9496836	Chr1	9613519	9614128	2
Chr1	9496051	9496995	Chr1	9542514	9543788	10
Chr1	9497613	9498629	Chr1	9542702	9543727	6
Chr1	9578340	9579282	Chr1	9590821	9591739	3
Chr1	9590975	9591514	Chr1	9613419	9614040	3
Chr1	9591015	9591660	Chr1	9619320	9620301	2
Chr1	9602078	9603214	Chr1	9619913	9620435	3
Chr1	9602172	9603266	Chr1	9613410	9614419	17
Chr1	9602341	9603201	Chr1	9616206	9616731	2
Chr1	9737083	9737603	Chr4	68443991	68444584	2
Chr1	9903342	9903875	Chr2	42311299	42311832	2
Chr1	9949570	9950519	Chr1	9961576	9962187	2
Chr1	10359165	10360246	Chr1	10370192	10371157	3
Chr1	10498550	10499204	Chr1	10542465	10543468	4
Chr1	10575938	10576473	Chr1	10588741	10589609	2
Chr1	10575949	10576492	Chr1	10713809	10714485	2
Chr1	10575960	10576875	Chr1	10725600	10726201	2
Chr1	10576017	10577353	Chr1	10696208	10697437	5
Chr1	10576023	10576922	Chr1	10783879	10784782	2
Chr1	10576054	10576737	Chr1	10842301	10842812	2
Chr1	10576249	10576881	Chr10	69716346	69717010	2
Chr1	10582934	10583625	Chr1	10656768	10657432	2
Chr1	10713757	10714641	Chr1	10725882	10726655	3
Chr1	11175431	11176064	Chr1	11211976	11212752	2
Chr1	11193478	11194930	Chr1	11210046	11211390	7
Chr1	11193945	11195048	Chr1	11211938	11213275	6
Chr1	11194234	11195083	Chr1	11218822	11219382	3
Chr1	11194258	11194887	Chr1	11230220	11230890	2
Chr1	11194293	11194849	Chr1	11209247	11209809	2
Chr1	11194392	11194967	Chr1	11629365	11630104	3
Chr1	11210110	11210994	Chr1	11218803	11219684	2
Chr1	11210186	11210918	Chr1	11629409	11630208	4
Chr1	11218833	11219714	Chr1	11463971	11464661	2
Chr1	11218837	11219405	Chr1	11629551	11630345	2
Chr1	11307222	11308139	Chr1	11316164	11316905	2
Chr1	11315999	11316949	Chr1	11629369	11630357	7
Chr1	11316093	11316802	Chr1	11872524	11873321	2
Chr1	11457905	11458798	Chr1	11629459	11630327	4
Chr1	11463835	11465027	Chr1	11629153	11630450	31
Chr1	11463927	11464513	Chr1	11516609	11517221	2
Chr1	11463929	11465056	Chr1	11606578	11607450	7
Chr1	11464017	11464878	Chr1	11651188	11651860	2
Chr1	11464063	11464889	Chr1	11476852	11477374	2
Chr1	11464242	11464945	Chr1	11515809	11516372	3
Chr1	11515514	11516425	Chr1	11629003	11629843	2
Chr1	11516637	11517263	Chr1	11629470	11630068	3
Chr1	11544920	11545967	Chr1	11629372	11630249	4
Chr1	11605522	11606265	Chr1	11629368	11630211	2
Chr1	11606364	11607620	Chr1	11629266	11630345	28
Chr1	11606588	11607393	Chr1	11665965	11666744	2
Chr1	11629230	11629911	Chr22	33248573	33249140	2
Chr1	11629230	11630205	Chr9	73012693	73013295	2
Chr1	11629316	11630008	Chr1	11797295	11797924	2
Chr1	11629373	11630325	Chr1	11651087	11652111	12
Chr1	11629595	11630265	Chr1	11666269	11666856	3
Chr1	12100439	12100976	Chr1	12109628	12110352	2
Chr1	12216355	12217195	Chr1	12244170	12244727	2
Chr1	12217764	12218297	Chr1	12243927	12244816	2
Chr1	12338089	12339001	Chr1	12364876	12365780	2
Chr1	12370230	12371092	Chr1	12467293	12467806	2
Chr1	12392775	12393762	Chr1	12535836	12536696	3
Chr1	12392806	12394099	Chr1	12555882	12557092	4
Chr1	12392878	12393396	Chr1	12403915	12404716	2
Chr1	12405466	12406124	Chr1	12535960	12536506	2
Chr1	12415868	12417022	Chr1	12428505	12429513	5
Chr1	12430182	12431079	Chr1	12544383	12544912	2
Chr1	12430431	12431117	Chr1	12588131	12588828	2
Chr1	12436821	12437478	Chr1	12556346	12557061	2
Chr1	12467083	12468327	Chr1	12556016	12557608	6
Chr1	12467102	12467889	Chr1	12535752	12536668	6
Chr1	12467245	12468054	Chr1	12675317	12676259	3
Chr1	12535325	12536319	Chr1	12555396	12555994	2
Chr1	12535578	12536786	Chr1	12556187	12558115	28
Chr1	12535631	12537167	Chr1	12544169	12546291	37
Chr1	12535821	12536721	Chr1	12664041	12665038	2
Chr1	12535851	12536690	Chr1	12588520	12589089	2
Chr1	12538236	12539009	Chr1	12555850	12557287	7
Chr1	12543300	12545353	Chr1	12555756	12557979	17
Chr1	12544225	12545232	Chr1	12553182	12554165	4
Chr1	12544726	12545230	Chr1	12675322	12675884	2
Chr1	12545364	12546365	Chr1	12555869	12556941	7
Chr1	12556217	12557219	Chr1	12578654	12579937	5
Chr1	12556238	12557100	Chr1	12677787	12678556	3
Chr1	12556284	12557131	Chr1	12657574	12658122	2
Chr1	12556290	12556837	Chr1	12664384	12664969	2
Chr1	12578566	12579320	Chr1	12675674	12676498	2
Chr1	12578960	12579477	Chr1	12587915	12588892	2
Chr1	12664097	12664948	Chr1	12674882	12675818	2
Chr1	13946369	13947011	Chr16	57189951	57190704	2
Chr1	13991611	13992577	Chr1	14041518	14042417	4
Chr1	13991932	13992814	Chr1	14052066	14053201	4
Chr1	13991973	13992910	Chr1	14284230	14284955	2
Chr1	13992156	13992712	Chr1	14286690	14287421	2
Chr1	14468613	14469802	Chr1	14605514	14606333	3
Chr1	14468732	14469318	Chr1	14501506	14502173	2
Chr1	14501633	14502344	Chr1	15284508	15285232	3
Chr1	14501674	14502285	Chr1	14974388	14975066	2
Chr1	14572868	14573602	Chr1	14605723	14606316	2
Chr1	14585577	14586355	Chr1	14605584	14606313	4
Chr1	14605684	14606379	Chr1	14825046	14825886	2
Chr1	14605784	14606590	Chr1	15284751	15285339	2
Chr1	14605876	14606385	Chr1	15064598	15065174	2
Chr1	14606045	14606638	Chr1	14974967	14975689	2
Chr1	14825058	14825907	Chr1	14951888	14952667	3
Chr1	14825258	14825968	Chr1	14837244	14837922	2
Chr1	14939697	14940967	Chr1	14951831	14952897	5
Chr1	14951750	14952752	Chr1	15064749	15065356	3
Chr1	14951819	14952512	Chr1	14975130	14975797	2
Chr1	14951941	14952701	Chr1	14961078	14961791	2
Chr1	14960809	14961350	Chr1	14975276	14975795	2
Chr1	14974558	14975673	Chr1	15284603	15285331	4
Chr1	14974952	14975585	Chr1	15064473	15065315	2
Chr1	14975278	14975855	Chr1	14993607	14994116	2
Chr1	15022420	15023186	Chr1	15064667	15065175	2
Chr1	15064502	15065291	Chr1	15284346	15285430	6
Chr1	15064652	15065347	Chr11	41952367	41952918	2
Chr1	15064700	15065341	Chr1	57978145	57978844	2
Chr1	15178684	15179459	Chr1	15284687	15285366	2
Chr1	15284198	15285453	Chr1	15330132	15331107	9
Chr1	15284312	15285259	Chr1	15312505	15313329	6
Chr1	15284426	15285444	Chr1	15607937	15608905	4
Chr1	15284568	15285244	Chr12	107742446	107743199	2
Chr1	15284682	15285275	Chr6	65141389	65142325	2
Chr1	15291765	15292489	Chr1	15330312	15330820	2
Chr1	15393958	15394663	Chr1	15607944	15608847	4
Chr1	15853195	15854142	Chr1	15865000	15865523	2
Chr1	16502500	16503085	Chr1	16575190	16575806	2
Chr1	16574688	16575828	Chr1	16594516	16595378	4
Chr1	16574957	16576008	Chr1	16675926	16676980	4
Chr1	16574997	16575570	Chr1	19939768	19940558	3
Chr1	16575094	16575883	Chr18	76005461	76006421	2
Chr1	16576011	16576958	Chr1	16626087	16627081	2
Chr1	16626273	16627145	Chr1	16676414	16676943	2
Chr1	16930637	16931387	Chr1	21771554	21772553	3
Chr1	16934371	16935862	Chr1	21771536	21772060	4
Chr1	16934822	16935485	Chr3	72812561	72813379	2
Chr1	17452015	17452897	Chr1	17562981	17564144	3
Chr1	17554133	17554680	Chr1	17563467	17564018	2
Chr1	18193370	18193940	Chr1	18218406	18219148	2
Chr1	18218544	18219094	Chr1	18367574	18368198	2
Chr1	18367354	18368147	Chr1	18404074	18404954	3
Chr1	18367415	18368194	Chr1	18625203	18625862	2
Chr1	18367539	18368057	Chr3	62887988	62888710	2
Chr1	18367568	18368170	Chr1	18420148	18420962	2
Chr1	18385529	18386134	Chr1	18404067	18405064	3
Chr1	18460945	18461469	Chr1	18516862	18517379	2
Chr1	18479777	18480465	Chr1	18790882	18791596	2
Chr1	18492055	18492616	Chr1	18528183	18528834	2
Chr1	18516871	18517451	Chr1	18528371	18528994	2
Chr1	18593632	18594631	Chr1	18606075	18606660	2
Chr1	18624889	18625911	Chr1	18646592	18647256	3
Chr1	18624957	18625484	Chr1	18642964	18643799	2
Chr1	18625013	18626174	Chr1	18766677	18767626	3
Chr1	18625045	18625737	Chr1	18790656	18791317	2
Chr1	18681060	18681803	Chr1	18767016	18767740	2
Chr1	18743638	18744407	Chr1	18790806	18791500	2
Chr1	18751696	18752421	Chr1	18766982	18767543	2
Chr1	18757868	18758491	Chr1	18790606	18791882	3
Chr1	18757915	18758719	Chr1	18766808	18767742	3
Chr1	18766712	18767643	Chr1	18790534	18791491	8
Chr1	18766739	18767646	Chr1	18861744	18862605	2
Chr1	18790492	18791349	Chr1	18861756	18862683	4
Chr1	18790552	18791077	Chr1	18806589	18807336	2
Chr1	18924029	18924643	Chr1	19146679	19147632	3
Chr1	19046518	19047180	Chr1	19060736	19061510	2
Chr1	19052516	19053519	Chr1	19060572	19061766	6
Chr1	19052556	19053071	Chr1	19093732	19094577	2
Chr1	19052579	19053571	Chr1	19415576	19416552	2
Chr1	19052652	19053352	Chr1	19406446	19406949	2
Chr1	19052654	19053514	Chr1	19146779	19147608	2
Chr1	19210691	19211272	Chr1	19229543	19230243	2
Chr1	19229821	19230482	Chr1	19271029	19271803	3
Chr1	19270995	19272081	Chr1	19391775	19393437	12
Chr1	19271022	19272031	Chr1	19406065	19407030	9
Chr1	19271467	19272018	Chr1	19401182	19402096	3
Chr1	19275324	19276104	Chr1	19392679	19393543	3
Chr1	19305159	19305900	Chr1	19315393	19315954	2
Chr1	19305369	19305885	Chr1	19392706	19393260	2
Chr1	19315041	19315981	Chr1	19406179	19406872	2
Chr1	19315188	19316355	Chr1	19333761	19334492	3
Chr1	19315198	19315910	Chr1	19392610	19393697	4
Chr1	19370255	19370998	Chr1	19422439	19423009	2
Chr1	19392257	19392792	Chr1	19404001	19404965	2
Chr1	19392449	19393438	Chr1	19401317	19402545	6
Chr1	19392509	19394147	Chr1	19406176	19407076	11
Chr1	19392570	19393433	Chr1	19415569	19416690	4
Chr1	19392606	19393309	Chr1	19418398	19419065	2
Chr1	19392733	19393444	Chr1	19939972	19940577	2
Chr1	19401611	19402512	Chr1	19415819	19416345	2
Chr1	19406098	19407408	Chr1	19415533	19416746	4
Chr1	19406340	19407291	Chr1	19423882	19424472	2
Chr1	19717610	19718542	Chr1	19753470	19754182	2
Chr1	19738721	19739806	Chr1	19753383	19754622	6
Chr1	19746727	19747451	Chr1	19939581	19940178	3
Chr1	19746821	19747600	Chr1	19840631	19841324	2
Chr1	19751012	19751757	Chr1	19840777	19841614	4
Chr1	19751077	19751972	Chr1	19939533	19940501	10
Chr1	19751086	19751952	Chr1	19785359	19786141	4
Chr1	19751125	19752020	Chr1	19831031	19831905	5
Chr1	19751175	19751923	Chr1	19941354	19942102	3
Chr1	19752812	19754268	Chr1	19840762	19841833	6
Chr1	19753019	19754366	Chr1	19830945	19832089	12
Chr1	19753035	19754410	Chr1	19939595	19940826	29
Chr1	19753308	19754289	Chr1	19941411	19942210	5
Chr1	19753326	19754352	Chr1	19791961	19793233	4
Chr1	19753361	19754301	Chr1	19966155	19967429	5
Chr1	19759818	19760566	Chr1	19939721	19940322	2
Chr1	19763021	19764073	Chr1	19830878	19832329	4
Chr1	19763797	19764544	Chr1	19939582	19940581	5
Chr1	19770590	19771336	Chr1	19840726	19841646	2
Chr1	19770630	19771203	Chr1	19939683	19940494	2
Chr1	19771853	19772702	Chr1	19785337	19786146	2
Chr1	19772098	19772843	Chr1	19831056	19832079	4
Chr1	19778484	19779243	Chr1	19939763	19940348	3
Chr1	19785255	19786234	Chr1	19831466	19832321	3
Chr1	19785274	19786247	Chr1	19939739	19940737	5
Chr1	19792335	19792912	Chr1	19966171	19967059	2
Chr1	19792457	19792979	Chr1	20139132	20139671	2
Chr1	19792543	19793468	Chr1	19831094	19832330	3
Chr1	19792807	19793479	Chr1	19939810	19940468	3
Chr1	19830961	19832302	Chr1	19840609	19841756	33
Chr1	19830997	19831867	Chr1	19946050	19946987	2
Chr1	19830997	19832073	Chr1	19939501	19940376	10
Chr1	19831014	19831867	Chr1	19941145	19942201	7
Chr1	19831048	19831817	Chr1	19943835	19944408	2
Chr1	19831130	19831686	Chr8	108626466	108627279	2
Chr1	19831173	19831713	Chr1	19937119	19937744	2
Chr1	19831307	19831970	Chr1	19966113	19967098	2
Chr1	19840707	19841665	Chr1	19939690	19940460	12
Chr1	19840712	19841727	Chr1	19946118	19946748	3
Chr1	19840794	19841600	Chr1	19966373	19967165	2
Chr1	19840802	19841551	Chr1	19941336	19942339	3
Chr1	19840853	19841644	Chr11	123185393	123186205	2
Chr1	19841088	19841624	Chr1	19874078	19874981	2
Chr1	19939305	19940572	Chr1	19981403	19982187	3
Chr1	19939371	19940308	Chr1	19955419	19956292	3
Chr1	19939633	19940236	Chr3	7200983	7201788	2
Chr1	19939640	19940467	Chr1	19966620	19967201	2
Chr1	19939674	19940201	Chr12	52519914	52520815	2
Chr1	19939848	19940356	Chr1	20235217	20236205	2
Chr1	19939918	19940627	Chr1	20139234	20139864	2
Chr1	19941260	19942054	Chr1	19955545	19956300	2
Chr1	19946093	19947034	Chr1	19956675	19957201	2
Chr1	20102544	20103496	Chr1	20113321	20113922	2
Chr1	20102834	20103463	Chr1	20139037	20139877	2
Chr1	20109203	20109884	Chr1	20139174	20139893	2
Chr1	20124709	20125333	Chr1	20141900	20142641	2
Chr1	20139047	20139652	Chr1	20216143	20216663	2
Chr1	20215930	20216989	Chr1	20231270	20232116	3
Chr1	20216264	20217040	Chr1	20232896	20233430	2
Chr1	20231403	20232057	Chr1	20864566	20865581	3
Chr1	20306569	20307075	Chr1	20348140	20348738	2
Chr1	20335776	20336609	Chr1	20347786	20348411	2
Chr1	20347497	20348871	Chr1	20358703	20359912	9
Chr1	20358762	20359308	Chr1	20400321	20401260	3
Chr1	20427247	20427824	Chr1	20478346	20479136	2
Chr1	20647695	20648227	Chr5	175960539	175961513	2
Chr1	20647714	20648779	Chr1	20667494	20668745	4
Chr1	20650658	20651195	Chr1	20667679	20668223	2
Chr1	20667114	20668714	Chr1	20682602	20684671	6
Chr1	20667684	20668205	Chr1	20686254	20686862	2
Chr1	20864895	20865551	Chr1	154808145	154808753	2
Chr1	20864906	20865442	Chr1	20965962	20966670	2
Chr1	21437122	21438127	Chr1	21494098	21494800	3
Chr1	21578129	21578677	Chr1	21705719	21706243	2
Chr1	21578331	21579080	Chr1	21658711	21659263	2
Chr1	21581701	21582423	Chr1	21594334	21594850	2
Chr1	21594239	21595277	Chr1	21602379	21603565	7
Chr1	21602592	21603392	Chr1	21658598	21659326	2
Chr1	21602930	21603485	Chr1	21664505	21665257	2
Chr1	21622689	21623189	Chr18	8342239	8342847	2
Chr1	21658742	21659260	Chr1	21949717	21950653	2
Chr1	21705802	21706389	Chr1	21831611	21832147	2
Chr1	21705820	21706687	Chr1	21951688	21952623	6
Chr1	21705832	21706755	Chr1	21899770	21901194	4
Chr1	21705873	21706386	Chr1	21866474	21867091	2
Chr1	21705897	21706467	Chr1	21898800	21899541	2
Chr1	21705903	21706651	Chr1	21949859	21950695	3
Chr1	21831415	21832089	Chr1	21949837	21950686	2
Chr1	21865378	21865970	Chr1	21898676	21899583	2
Chr1	21898795	21899609	Chr1	21952065	21952834	4
Chr1	21899033	21899637	Chr1	21949755	21950709	2
Chr1	21900496	21901316	Chr1	21947102	21947863	2
Chr1	21901020	21901675	Chr1	21985336	21985921	2
Chr1	21949837	21950458	Chr1	21960674	21961385	2
Chr1	21949938	21950460	Chr1	21985706	21986580	2
Chr1	21951697	21953047	Chr1	21960363	21961741	8
Chr1	21951717	21952662	Chr18	45045746	45046396	2
Chr1	21951810	21952790	Chr1	22270606	22271474	4
Chr1	21951930	21952609	Chr1	22102682	22103306	2
Chr1	21951931	21952606	Chr17	29232794	29233660	2
Chr1	21951954	21952899	Chr1	22685795	22686503	2
Chr1	22004812	22005605	Chr1	22016357	22017066	2
Chr1	22087243	22088232	Chr1	22102385	22103229	4
Chr1	22102231	22103114	Chr1	22283594	22284404	4
Chr1	22102342	22103664	Chr1	22270509	22271475	4
Chr1	22102612	22103158	Chr1	22136971	22137499	2
Chr1	22196173	22196702	Chr1	22270320	22271139	2
Chr1	22263912	22264844	Chr1	22283143	22284355	3
Chr1	22270568	22271441	Chr1	22283211	22284641	9
Chr1	22583570	22584421	Chr1	22674581	22675830	3
Chr1	22587218	22587766	Chr1	22686023	22686884	2
Chr1	22635573	22636248	Chr7	121263709	121264246	2
Chr1	22674575	22675905	Chr1	22685688	22687031	8
Chr1	22674759	22675588	Chr1	22714618	22715408	3
Chr1	22685732	22686546	Chr1	22714239	22715069	5
Chr1	22714471	22715395	Chr1	22738780	22739496	3
Chr1	22746696	22747678	Chr1	22968315	22968818	2
Chr1	22761075	22761854	Chr1	22798880	22799402	2
Chr1	22782076	22782686	Chr1	22799060	22799718	2
Chr1	22793267	22793853	Chr1	22813523	22814351	2
Chr1	22798785	22799521	Chr1	22825634	22826798	4
Chr1	22798788	22799711	Chr1	22812100	22813067	7
Chr1	22798829	22799585	Chr1	22955562	22956247	2
Chr1	22798841	22799944	Chr1	22813532	22814437	11
Chr1	22798883	22799719	Chr1	23629765	23630311	2
Chr1	22813663	22814392	Chr1	22825935	22826612	3
Chr1	23007275	23008053	Chr1	23293946	23294583	2
Chr1	23043473	23044626	Chr1	23293968	23294768	4
Chr1	23044173	23044742	Chr1	23102712	23103475	2
Chr1	23094828	23095760	Chr1	23179860	23180690	2
Chr1	23152958	23153522	Chr1	23196871	23197791	3
Chr1	23153214	23154097	Chr1	23195748	23196263	2
Chr1	23294372	23294943	Chr1	23629767	23630397	2
Chr1	23295458	23296075	Chr1	23409915	23410865	2
Chr1	23295834	23296346	Chr1	23411747	23412492	2
Chr1	23353312	23354284	Chr1	23361638	23362483	2
Chr1	23411605	23412539	Chr1	23629779	23630545	2
Chr1	23605616	23606135	Chr1	23629943	23630508	2
Chr1	23616591	23617418	Chr1	23629841	23630699	2
Chr1	23629657	23630460	Chr1	23753178	23753686	2
Chr1	23629804	23630576	Chr1	23776268	23776975	2
Chr1	23629903	23630557	Chr1	23638115	23638941	3
Chr1	23750882	23751804	Chr1	23778059	23778990	2
Chr1	23753328	23754087	Chr1	23776359	23776891	2
Chr1	23884611	23885447	Chr1	76534364	76535157	2
Chr1	23965201	23965988	Chr1	24054013	24054681	2
Chr1	24053737	24054562	Chr1	24099634	24100258	2
Chr1	24099713	24100503	Chr1	24111179	24111972	2
Chr1	24111044	24111629	Chr1	24310891	24311424	2
Chr1	24298089	24298747	Chr1	24310993	24311495	2
Chr1	24310655	24311544	Chr1	24455471	24456277	3
Chr1	24310759	24311358	Chr1	24344890	24345709	3
Chr1	24310821	24311326	Chr1	24362722	24363242	2
Chr1	24310868	24311405	Chr6	38212426	38213202	2
Chr1	24455591	24456534	Chr1	24469013	24469688	3
Chr1	24528105	24528880	Chr1	24715949	24716925	5
Chr1	24528306	24528943	Chr1	24638486	24639405	2
Chr1	24532606	24533299	Chr1	24641735	24642260	2
Chr1	24532775	24533699	Chr1	24716302	24716919	2
Chr1	24532848	24533503	Chr1	24669806	24670826	5
Chr1	24532878	24533404	Chr1	24884952	24885591	2
Chr1	24543105	24543624	Chr1	24715556	24716441	2
Chr1	24589675	24590660	Chr1	24711150	24711660	2
Chr1	24610166	24610893	Chr1	24711314	24711912	2
Chr1	24638273	24639076	Chr1	24711262	24712142	2
Chr1	24641762	24642268	Chr1	24670148	24670735	2
Chr1	24661377	24662532	Chr1	24669655	24670952	9
Chr1	24661411	24662401	Chr1	24715936	24716476	2
Chr1	24669773	24670652	Chr1	24711028	24711886	3
Chr1	24669840	24670487	Chr5	154508704	154509626	2
Chr1	24669937	24670784	Chr1	24715916	24716843	3
Chr1	24725228	24725786	Chr2	127901303	127902121	2
Chr1	24725248	24726026	Chr1	24744000	24744643	3
Chr1	24884982	24885536	Chr1	24981899	24982499	2
Chr1	24885083	24885591	Chr1	24894515	24895084	2
Chr1	24897315	24897909	Chr1	24971381	24972134	2
Chr1	24971437	24972351	Chr1	24981516	24982491	4
Chr1	24981967	24982488	Chr1	25056575	25057434	2
Chr1	25179643	25180710	Chr1	25358243	25359352	5
Chr1	25179850	25180636	Chr1	25407430	25408161	2
Chr1	25180151	25181017	Chr1	25219673	25220532	6
Chr1	25180357	25181018	Chr1	25578959	25579681	2
Chr1	25219979	25220737	Chr1	25468001	25468778	2
Chr1	25338455	25339145	Chr1	25358523	25359234	2
Chr1	25406495	25407205	Chr1	25417674	25418560	2
Chr1	25443540	25444246	Chr1	25454994	25455564	2
Chr1	25468104	25468625	Chr1	25504600	25505514	2
Chr1	25468185	25468799	Chr1	25516026	25516747	2
Chr1	25758305	25758834	Chr1	25785539	25786056	2
Chr1	25785190	25786049	Chr1	25827367	25828155	3
Chr1	25785260	25785968	Chr1	25802485	25803193	3
Chr1	25785361	25786020	Chr2	162940513	162941249	2
Chr1	25894346	25895248	Chr1	26111828	26112809	2
Chr1	26007768	26008756	Chr1	26122663	26123237	2
Chr1	26041471	26041992	Chr1	26122770	26123363	2
Chr1	26099419	26099982	Chr1	26109789	26110371	2
Chr1	26105679	26106453	Chr1	26122592	26123578	2
Chr1	26108974	26110071	Chr1	26122634	26123478	6
Chr1	26109264	26109898	Chr1	26216026	26216700	2
Chr1	26112028	26112904	Chr1	26122824	26123675	4
Chr1	26163466	26164376	Chr1	26215962	26216509	2
Chr1	26193795	26194595	Chr1	26216067	26216935	2
Chr1	26207054	26208045	Chr1	26217091	26218000	2
Chr1	26216209	26216841	Chr1	26330906	26331629	2
Chr1	26361913	26362629	Chr1	26421127	26421662	2
Chr1	26362279	26362782	Chr1	26398937	26399523	2
Chr1	26371649	26372294	Chr1	26421314	26421887	2
Chr1	26371888	26372949	Chr1	26406258	26407471	3
Chr1	26380368	26381271	Chr1	26423811	26424460	2
Chr1	26390805	26391731	Chr1	26420962	26421565	3
Chr1	26390866	26391584	Chr1	26424116	26424677	2
Chr1	26393140	26394261	Chr1	26406400	26407259	5
Chr1	26393481	26394313	Chr1	26421005	26421817	3
Chr1	26393496	26394288	Chr1	26424039	26425000	4
Chr1	26399056	26400013	Chr1	26420955	26421848	4
Chr1	26399159	26399958	Chr1	26423983	26424812	4
Chr1	26399278	26399792	Chr15	52216967	52217720	2
Chr1	26405827	26407274	Chr1	26423441	26424821	7
Chr1	26406308	26407298	Chr1	26420921	26421897	5
Chr1	26424023	26424860	Chr1	26564889	26565767	4
Chr1	26947038	26947588	Chr1	27021638	27022298	2
Chr1	26947125	26947667	Chr1	27019787	27020297	2
Chr1	27028444	27030059	Chr1	27125701	27127285	10
Chr1	27028548	27029104	Chr1	27070526	27071202	2
Chr1	27029237	27030084	Chr1	27057765	27058559	2
Chr1	27060127	27060632	Chr1	27126350	27127189	2
Chr1	27126047	27127014	Chr1	27152592	27153330	2
Chr1	27675618	27676603	Chr1	27692701	27693603	2
Chr1	27726477	27727059	Chr1	163985167	163985973	2
Chr1	27757429	27757993	Chr1	27848428	27849363	2
Chr1	27823657	27824281	Chr1	27854829	27855493	2
Chr1	27823680	27824554	Chr1	27848432	27849289	3
Chr1	27903094	27903911	Chr13	110707720	110708270	2
Chr1	28114543	28115055	Chr1	28148522	28149112	2
Chr1	28398737	28399335	Chr1	28417543	28418098	2
Chr1	28417337	28418064	Chr1	28496655	28497175	2
Chr1	28417387	28418341	Chr1	28535972	28536896	8
Chr1	28417469	28418199	Chr1	28531444	28532409	4
Chr1	28498977	28499757	Chr1	28531572	28532300	2
Chr1	28499414	28499965	Chr1	28534789	28535589	2
Chr1	28755208	28756435	Chr1	28764101	28765278	6
Chr1	28764547	28765386	Chr1	28783851	28784502	2
Chr1	28764648	28765155	Chr1	28792806	28793371	2
Chr1	28764791	28765318	Chr1	28802611	28803439	3
Chr1	29660299	29661331	Chr1	29681032	29682252	5
Chr1	29660715	29661463	Chr1	30178948	30179668	2
Chr1	29681379	29682181	Chr1	30178534	30179135	2
Chr1	29839806	29840608	Chr1	30178900	30179842	2
Chr1	29843801	29844464	Chr1	29853590	29854362	2
Chr1	29853419	29854318	Chr1	30155411	30156379	4
Chr1	29853659	29854506	Chr1	30178892	30179774	4
Chr1	29853708	29854340	Chr1	29868915	29869740	2
Chr1	29854924	29855929	Chr1	29868424	29869677	3
Chr1	30122423	30122971	Chr1	30178985	30179881	2
Chr1	30155045	30156487	Chr1	30178184	30179831	17
Chr1	30178267	30179502	Chr1	30582840	30584120	6
Chr1	30178456	30179270	Chr1	30561409	30561934	2
Chr1	30179544	30180074	Chr1	30583438	30584651	3
Chr1	30457917	30458708	Chr1	30722948	30723682	2
Chr1	30512110	30512729	Chr1	30583348	30584681	3
Chr1	30561576	30562967	Chr1	30583170	30584541	4
Chr1	30583298	30584171	Chr1	30723434	30724265	3
Chr1	31137077	31137772	Chr1	31148563	31149076	2
Chr1	31207978	31208973	Chr1	31261099	31262096	5
Chr1	31261145	31261959	Chr1	31288354	31289178	5
Chr1	31261380	31261946	Chr1	31280452	31280975	2
Chr1	31274806	31275355	Chr1	31383942	31384541	2
Chr1	31280100	31281037	Chr1	31306827	31308343	5
Chr1	31288286	31289078	Chr1	31307522	31308366	2
Chr1	31288555	31289074	Chr1	31296932	31297849	2
Chr1	31296584	31297254	Chr1	31307460	31308148	2
Chr1	31403971	31404526	Chr1	31435887	31436808	2
Chr1	31688475	31689446	Chr1	31730947	31731891	3
Chr1	31688487	31689002	Chr1	32071116	32072031	2
Chr1	31688850	31689370	Chr13	109609244	109609912	2
Chr1	31708517	31709196	Chr1	31731077	31731819	4
Chr1	32092889	32093688	Chr1	32122328	32123217	2
Chr1	32308139	32309132	Chr1	32363284	32363788	2
Chr1	32308301	32309147	Chr1	32391888	32392482	2
Chr1	32689549	32690158	Chr1	32782192	32782719	2
Chr1	32871469	32872726	Chr1	32967016	32968082	4
Chr1	32871747	32872440	Chr1	33232679	33233471	2
Chr1	32871835	32872736	Chr1	32940344	32941014	2
Chr1	32920162	32920868	Chr1	32940323	32941278	2
Chr1	32920272	32920888	Chr1	32967272	32968217	3
Chr1	32940273	32941384	Chr1	32967260	32968574	14
Chr1	32940344	32941208	Chr1	32961545	32962663	5
Chr1	32967512	32968241	Chr1	33232859	33233631	3
Chr1	32986109	32986693	Chr1	33146719	33147676	2
Chr1	33163460	33163980	Chr21	21725773	21726395	2
Chr1	33219665	33220540	Chr1	33232985	33233767	2
Chr1	33229115	33229673	Chr2	189437862	189438582	2
Chr1	33233119	33233816	Chr8	74546912	74547594	2
Chr1	33476305	33477101	Chr3	187980920	187981730	2
Chr1	33618405	33619256	Chr1	33705675	33706632	6
Chr1	33635058	33635766	Chr1	33705804	33706685	3
Chr1	33689109	33689629	Chr17	41400847	41401678	2
Chr1	33705780	33706689	Chr1	33848828	33849826	3
Chr1	33705991	33706776	Chr1	33720623	33721489	3
Chr1	33706099	33706671	Chr1	34212230	34212747	2
Chr1	33842241	33843202	Chr1	33879603	33880489	6
Chr1	33848638	33849875	Chr1	33879422	33880391	5
Chr1	33849051	33849874	Chr1	33857574	33858192	2
Chr1	33849214	33849860	Chr1	33947547	33948296	2
Chr1	33879544	33880111	Chr1	33892436	33893049	2
Chr1	33947770	33948329	Chr12	96892580	96893099	2
Chr1	34096036	34096573	Chr1	34224115	34224615	2
Chr1	34098753	34099256	Chr1	34191224	34191841	2
Chr1	34105452	34106155	Chr1	35203680	35204199	2
Chr1	34105526	34106438	Chr1	34212006	34212903	4
Chr1	34105574	34106816	Chr1	34125434	34126501	4
Chr1	34105811	34106422	Chr1	34118422	34119175	2
Chr1	34106345	34106945	Chr1	34124046	34124567	2
Chr1	34108977	34109881	Chr1	34118394	34119132	2
Chr1	34118437	34119314	Chr1	34480400	34481083	2
Chr1	34124753	34125548	Chr1	34224367	34224897	2
Chr1	34125027	34126451	Chr1	34212119	34213499	10
Chr1	34125323	34126355	Chr1	34379991	34381173	4
Chr1	34125354	34126102	Chr1	34205297	34205948	2
Chr1	34125385	34126510	Chr1	34185410	34186264	3
Chr1	34125505	34126479	Chr1	34871532	34872455	2
Chr1	34125561	34126623	Chr1	34479674	34481015	9
Chr1	34125577	34126297	Chr1	34223531	34224912	7
Chr1	34125662	34126335	Chr1	34191486	34192084	2
Chr1	34125707	34126308	Chr1	34517799	34518406	2
Chr1	34125802	34126449	Chr1	34176540	34177117	2
Chr1	34185326	34185896	Chr1	34224257	34224782	2
Chr1	34204859	34205401	Chr1	34224070	34224924	2
Chr1	34211858	34213100	Chr1	34223903	34225375	57
Chr1	34211942	34213058	Chr1	34517839	34518867	9
Chr1	34211999	34213031	Chr1	34480013	34480967	10
Chr1	34212514	34213055	Chr1	34380398	34380933	2
Chr1	34213261	34214160	Chr1	34224056	34224912	4
Chr1	34223785	34224871	Chr1	34380035	34381398	7
Chr1	34224026	34224948	Chr1	34480024	34480805	10
Chr1	34224071	34225123	Chr1	34243908	34245104	5
Chr1	34224129	34224908	Chr1	34517917	34518834	7
Chr1	34224340	34224880	Chr1	35203557	35204231	2
Chr1	34309570	34310460	Chr1	34380546	34381290	4
Chr1	34366697	34367797	Chr1	34380376	34381143	5
Chr1	34366908	34367482	Chr1	34479953	34480730	2
Chr1	34379921	34381261	Chr1	34479789	34480903	15
Chr1	34380492	34381403	Chr1	34517907	34518797	5
Chr1	34380600	34381253	Chr1	34438727	34439316	2
Chr1	34405135	34406276	Chr1	34479845	34480999	6
Chr1	34479975	34480653	Chr6	135445538	135446263	2
Chr1	34479985	34480951	Chr1	34866350	34866948	2
Chr1	34480016	34480865	Chr1	34491649	34492216	4
Chr1	34480044	34480915	Chr1	34517875	34518796	11
Chr1	34480049	34480915	Chr7	16920029	16920931	2
Chr1	34480071	34480612	Chr21	32524085	32524692	2
Chr1	34480083	34480691	Chr6	42015218	42016149	2
Chr1	34480217	34480739	Chr1	34490915	34491565	3
Chr1	34480244	34480889	Chr1	34516923	34517517	2
Chr1	34480357	34480887	Chr1	34501006	34501706	2
Chr1	34490608	34491405	Chr1	34517895	34518409	2
Chr1	34491458	34492129	Chr1	34517869	34518644	2
Chr1	34760118	34760931	Chr1	34847869	34848558	2
Chr1	34845181	34845980	Chr1	34866372	34866874	2
Chr1	35251895	35252710	Chr1	35318069	35318584	2
Chr1	35264341	35265264	Chr1	35315939	35316529	3
Chr1	35331849	35332420	Chr1	146713740	146714417	2
Chr1	35476525	35477213	Chr1	35647937	35648488	2
Chr1	35647803	35648454	Chr1	35791698	35792433	2
Chr1	35791629	35792534	Chr1	35820684	35821243	2
Chr1	35791633	35792348	Chr1	35818856	35819371	2
Chr1	35908034	35908809	Chr1	36021654	36022624	2
Chr1	35908302	35908877	Chr1	36019106	36019953	2
Chr1	35971298	35972105	Chr1	36019502	36020388	2
Chr1	36366889	36367394	Chr1	36397027	36397835	2
Chr1	36615126	36616053	Chr1	36653359	36654251	2
Chr1	36626809	36627408	Chr1	36665534	36666165	2
Chr1	36626886	36627795	Chr1	36705315	36706003	2
Chr1	36653502	36654183	Chr1	36665393	36666049	2
Chr1	36665095	36666455	Chr1	36704969	36706164	26
Chr1	36665275	36666286	Chr1	36720241	36721257	10
Chr1	36665329	36666247	Chr1	36762332	36763285	9
Chr1	36665331	36666306	Chr1	36697754	36698599	4
Chr1	36665368	36666073	Chr1	36704069	36704853	2
Chr1	36665413	36666211	Chr1	36734714	36735600	5
Chr1	36665588	36666179	Chr1	36696610	36697565	3
Chr1	36665604	36666144	Chr2	175020557	175021214	2
Chr1	36665656	36666304	Chr1	36690088	36690690	2
Chr1	36689471	36690033	Chr1	36705238	36705912	2
Chr1	36696183	36697334	Chr1	36705249	36706131	6
Chr1	36697839	36698819	Chr1	36712909	36713837	2
Chr1	36697909	36698721	Chr1	36720183	36721270	4
Chr1	36703488	36704325	Chr1	36762466	36763297	2
Chr1	36705065	36706183	Chr1	36762249	36763331	17
Chr1	36705083	36706192	Chr1	36719962	36721408	13
Chr1	36705126	36706281	Chr1	36734538	36735646	10
Chr1	36705163	36705766	Chr1	36738295	36739213	5
Chr1	36705452	36705966	Chr5	23590951	23591471	2
Chr1	37107040	37107718	Chr1	37138730	37139543	3
Chr1	37342219	37342745	Chr3	53383080	53383600	2
Chr1	37536192	37536760	Chr1	37584796	37585847	3
Chr1	37575862	37576787	Chr1	37585146	37586012	5
Chr1	37584683	37585754	Chr1	37595763	37596454	3
Chr1	37584889	37585807	Chr1	37712299	37713255	3
Chr1	37585243	37585828	Chr1	37927089	37927846	2
Chr1	37839952	37840541	Chr1	37864181	37865118	2
Chr1	37864377	37865113	Chr1	37882553	37883261	2
Chr1	37914448	37915209	Chr1	37964426	37965332	4
Chr1	37926800	37927555	Chr1	37963202	37964084	2
Chr1	37926833	37927920	Chr1	37964505	37965505	15
Chr1	37926850	37927934	Chr1	37949766	37950797	8
Chr1	37926958	37927820	Chr1	37999719	38000566	4
Chr1	37949864	37950838	Chr1	37964435	37965457	15
Chr1	37949893	37950540	Chr1	37963041	37963595	2
Chr1	37949937	37950544	Chr1	37961245	37961747	2
Chr1	37949967	37950767	Chr1	37973315	37974311	2
Chr1	37961195	37961975	Chr1	37973024	37973624	2
Chr1	37963098	37965657	Chr1	37972997	37974436	57
Chr1	37964516	37965424	Chr8	59801164	59801936	2
Chr1	37964581	37965534	Chr1	37999723	38000638	5
Chr1	37964687	37965455	Chr1	37980463	37981108	2
Chr1	37973603	37974345	Chr1	37999868	38000826	2
Chr1	38327624	38328569	Chr1	38348987	38349725	2
Chr1	38491251	38492156	Chr1	38705669	38706571	2
Chr1	38580410	38581481	Chr1	38608172	38608815	3
Chr1	38594535	38595542	Chr1	38608073	38608854	11
Chr1	38594556	38595172	Chr1	38660403	38660909	2
Chr1	38607887	38609013	Chr1	38660034	38661085	10
Chr1	38659946	38660885	Chr1	38693972	38694727	3
Chr1	38660152	38661037	Chr3	29530515	29531180	2
Chr1	38660248	38661060	Chr12	75538611	75539590	2
Chr1	39531027	39531950	Chr1	39541797	39542462	2
Chr1	39582430	39583409	Chr1	39594110	39595175	4
Chr1	39813666	39814524	Chr1	39831831	39832724	4
Chr1	39878658	39879524	Chr1	39888360	39888871	2
Chr1	39940247	39940965	Chr1	40010105	40010641	2
Chr1	40118759	40119572	Chr1	40166205	40167378	5
Chr1	40149746	40150391	Chr1	40166813	40167323	2
Chr1	40166529	40167141	Chr1	97310307	97311178	2
Chr1	40166536	40167437	Chr1	40300482	40301439	2
Chr1	40166576	40167146	Chr1	40496128	40496708	2
Chr1	40300382	40301209	Chr1	40342258	40343560	7
Chr1	40300405	40301134	Chr1	40318508	40319355	3
Chr1	40300447	40301105	Chr1	40392205	40392768	2
Chr1	40300475	40301057	Chr1	40496095	40497045	3
Chr1	40300836	40301447	Chr1	40315895	40316609	2
Chr1	40315939	40316538	Chr3	145694559	145695369	2
Chr1	40315967	40316519	Chr1	40495752	40496608	2
Chr1	40315973	40316772	Chr1	40357789	40358448	2
Chr1	40316059	40316950	Chr1	40342307	40343609	6
Chr1	40316289	40316829	Chr1	40356315	40356989	2
Chr1	40318413	40319292	Chr1	40342821	40343363	3
Chr1	40325291	40326146	Chr1	40342765	40343633	2
Chr1	40342481	40343586	Chr1	40495657	40497230	7
Chr1	40342664	40343631	Chr1	40410580	40411100	2
Chr1	40342693	40343664	Chr1	40391958	40393062	3
Chr1	40342724	40343400	Chr1	40355996	40357000	6
Chr1	40342803	40343776	Chr2	73296618	73297138	2
Chr1	40356200	40356925	Chr1	40410153	40410946	4
Chr1	40356300	40356918	Chr1	40392427	40393000	3
Chr1	40391784	40393291	Chr1	40409887	40411081	31
Chr1	40392018	40393621	Chr1	40495733	40497257	9
Chr1	40392043	40393105	Chr1	40503344	40504283	3
Chr1	40392538	40393151	Chr1	40439424	40440032	2
Chr1	40392579	40393537	Chr1	40425904	40426467	2
Chr1	40410007	40410919	Chr1	40496120	40496934	4
Chr1	40410160	40411005	Chr1	40425874	40426669	5
Chr1	40439026	40440066	Chr1	40495916	40496838	3
Chr1	40442545	40443231	Chr1	40495973	40496711	2
Chr1	40468975	40469906	Chr1	40496304	40496956	2
Chr1	40496218	40497041	Chr5	67466892	67467499	2
Chr1	40496422	40497174	Chr1	40512230	40512841	2
Chr1	40503583	40504177	Chr1	40517699	40518207	2
Chr1	40747307	40748659	Chr1	40767131	40768258	16
Chr1	40767363	40768333	Chr8	30012518	30013311	2
Chr1	41328257	41329007	Chr1	41410487	41411134	3
Chr1	41328306	41328922	Chr1	41395465	41396112	2
Chr1	41370725	41371430	Chr1	41410589	41411140	2
Chr1	41592476	41593319	Chr1	41705348	41706277	2
Chr1	41619829	41620538	Chr1	41703545	41704449	2
Chr1	41826051	41826641	Chr1	41875388	41876217	2
Chr1	41897719	41898272	Chr1	41931040	41931989	2
Chr1	41897819	41898592	Chr1	41947551	41948290	2
Chr1	41939799	41940299	Chr1	41951401	41951927	2
Chr1	41951017	41951952	Chr1	41961931	41962596	2
Chr1	42138612	42139123	Chr15	61963850	61964420	2
Chr1	42318255	42318810	Chr1	42347056	42347791	2
Chr1	42326621	42327547	Chr1	42499860	42500770	2
Chr1	42416169	42416718	Chr1	42447281	42447917	2
Chr1	42612304	42613281	Chr1	42777951	42778802	2
Chr1	42612395	42613203	Chr1	42805502	42806294	2
Chr1	42630815	42631794	Chr1	42642031	42642978	3
Chr1	42642353	42643048	Chr1	42801896	42802702	2
Chr1	42645662	42646494	Chr1	42805851	42807014	5
Chr1	42645809	42646352	Chr1	42778334	42778947	2
Chr1	42663853	42664479	Chr1	42778235	42778866	2
Chr1	43286431	43287413	Chr1	43306396	43306993	3
Chr1	43397552	43398172	Chr1	43408515	43409022	2
Chr1	43412178	43413108	Chr1	43504795	43505500	2
Chr1	43423707	43424589	Chr1	43505037	43505994	2
Chr1	43457618	43458434	Chr1	43504771	43505899	4
Chr1	43497028	43497682	Chr1	43505112	43505644	2
Chr1	43504439	43505433	Chr7	154639388	154640079	2
Chr1	43504723	43505715	Chr12	70112916	70113893	2
Chr1	43576767	43577270	Chr8	133271774	133272315	2
Chr1	43599273	43599793	Chr10	56909239	56910036	2
Chr1	43620660	43621665	Chr1	43700804	43701550	4
Chr1	43692799	43693581	Chr1	43848894	43849847	4
Chr1	43695852	43696416	Chr1	43848858	43849421	2
Chr1	43698112	43699246	Chr1	43706714	43707315	3
Chr1	43700659	43701705	Chr1	43861271	43862387	5
Chr1	43700848	43701696	Chr1	43730711	43731354	2
Chr1	43706724	43707291	Chr1	43813899	43814517	2
Chr1	43707014	43707606	Chr1	43760930	43761848	3
Chr1	43996338	43996978	Chr1	44066025	44066580	3
Chr1	44157704	44158239	Chr1	44223303	44223820	2
Chr1	44206880	44207565	Chr1	44223184	44224097	4
Chr1	44223150	44223858	Chr1	44266935	44267466	2
Chr1	44223170	44224061	Chr1	44257962	44258768	3
Chr1	44248838	44249806	Chr1	44380232	44380966	2
Chr1	44249179	44250244	Chr1	44258242	44259240	3
Chr1	44257755	44258700	Chr1	44357980	44358567	2
Chr1	44257830	44259374	Chr1	44266664	44267634	8
Chr1	44258010	44258786	Chr1	44333761	44334323	2
Chr1	44258019	44258771	Chr1	44378658	44379475	4
Chr1	44304145	44304723	Chr1	44337825	44338446	2
Chr1	44793314	44794127	Chr9	22098096	22099014	2
Chr1	44938275	44939091	Chr1	44946751	44947701	2
Chr1	44946812	44947633	Chr1	44973787	44974386	2
Chr1	44954723	44955281	Chr1	44974166	44974691	2
Chr1	45048666	45049404	Chr1	45060966	45061545	2
Chr1	45516752	45517682	Chr1	45607065	45607910	3
Chr1	45516833	45517505	Chr1	45555117	45555643	2
Chr1	45848725	45849628	Chr1	45911557	45912409	2
Chr1	45858544	45859213	Chr1	45956560	45957273	2
Chr1	46288128	46288821	Chr1	46321900	46322553	2
Chr1	46321805	46322633	Chr1	46330044	46330830	2
Chr1	46376104	46376863	Chr1	46490166	46490788	2
Chr1	46419360	46420224	Chr1	46441011	46441527	2
Chr1	46440971	46441642	Chr1	46489786	46490675	3
Chr1	46489928	46490866	Chr1	46505196	46505788	3
Chr1	46505188	46505880	Chr1	46513528	46514327	2
Chr1	46999113	46999713	Chr1	47007537	47008110	2
Chr1	47078747	47079380	Chr1	47108924	47109690	3
Chr1	47104364	47104892	Chr1	47147329	47147963	2
Chr1	47108623	47109690	Chr1	47147278	47148297	4
Chr1	47108631	47109620	Chr1	47117987	47118610	2
Chr1	47108745	47109316	Chr1	47185132	47185898	2
Chr1	47108899	47109436	Chr1	47117189	47117963	2
Chr1	47108937	47109677	Chr1	47190181	47191059	2
Chr1	47108949	47109529	Chr1	47127484	47128054	2
Chr1	47127444	47128409	Chr1	47147028	47148022	2
Chr1	47133075	47133743	Chr1	47147199	47148174	2
Chr1	47496449	47497364	Chr20	3956818	3957785	2
Chr1	47496495	47497045	Chr1	47643494	47644123	2
Chr1	47643403	47644276	Chr1	47732657	47733320	4
Chr1	47643584	47644328	Chr1	47813694	47814446	2
Chr1	47732895	47733487	Chr1	47819871	47820406	2
Chr1	47935458	47936177	Chr1	47943801	47944571	2
Chr1	47943520	47944039	Chr1	47993291	47993849	2
Chr1	47990608	47991744	Chr1	48012171	48013213	8
Chr1	47990814	47991389	Chr1	48237597	48238122	2
Chr1	48001994	48002885	Chr1	48175825	48176815	2
Chr1	48002138	48002846	Chr1	48012426	48013025	2
Chr1	48012113	48012822	Chr1	48173822	48174478	3
Chr1	48198983	48199661	Chr1	48340419	48341315	2
Chr1	48237080	48237949	Chr1	48340820	48342051	5
Chr1	48263562	48264250	Chr1	48429318	48429891	2
Chr1	48302567	48303151	Chr1	48341445	48341958	2
Chr1	48340418	48341366	Chr1	48429223	48429861	3
Chr1	48340441	48341641	Chr1	48359961	48360735	3
Chr1	48392293	48393761	Chr1	48428991	48429927	5
Chr1	48428994	48429834	Chr1	48444453	48445287	5
Chr1	48429140	48430390	Chr1	48438018	48439055	4
Chr1	48439507	48440487	Chr15	86020756	86021400	2
Chr1	48702640	48703506	Chr1	48716689	48717300	2
Chr1	48710750	48711289	Chr1	48918548	48919051	2
Chr1	48716557	48717132	Chr1	48918360	48919152	2
Chr1	48716586	48717427	Chr1	48775187	48776001	2
Chr1	48716861	48717445	Chr9	84300525	84301098	2
Chr1	48716960	48717482	Chr1	48871164	48871702	2
Chr1	48870798	48871690	Chr1	48915258	48916256	2
Chr1	48870844	48871734	Chr1	48918280	48919080	6
Chr1	48918176	48919196	Chr1	48935187	48935945	5
Chr1	49002230	49002753	Chr1	49929537	49930206	2
Chr1	49017771	49018535	Chr1	49380873	49381451	2
Chr1	49131179	49131926	Chr1	49142234	49143108	2
Chr1	49243784	49244304	Chr8	108503048	108503682	2
Chr1	49313053	49314265	Chr1	49380669	49381652	3
Chr1	49380295	49381239	Chr1	49443921	49444784	2
Chr1	49380576	49381337	Chr1	49439196	49439917	4
Chr1	49380591	49381524	Chr1	50104734	50105265	2
Chr1	49380655	49381606	Chr1	49656527	49657146	3
Chr1	49380657	49381765	Chr1	49404573	49405384	7
Chr1	49380860	49381556	Chr1	49529592	49530501	2
Chr1	49381126	49381648	Chr1	49446357	49447098	2
Chr1	49382084	49382779	Chr1	49490667	49491532	3
Chr1	49382932	49383736	Chr1	49443774	49444746	2
Chr1	49383318	49384288	Chr1	49404449	49405318	5
Chr1	49383462	49384253	Chr1	49403734	49404379	2
Chr1	49383526	49384394	Chr1	49439294	49439966	3
Chr1	49403701	49405399	Chr1	49656514	49657268	5
Chr1	49404258	49405030	Chr1	49816500	49817121	2
Chr1	49404420	49405356	Chr1	49533296	49533838	2
Chr1	49404421	49405459	Chr1	49439154	49440470	25
Chr1	49404471	49405298	Chr1	50159906	50160786	4
Chr1	49404513	49405418	Chr1	49572838	49573662	2
Chr1	49404550	49405197	Chr1	49812215	49813129	2
Chr1	49404550	49405731	Chr1	49443803	49444983	7
Chr1	49404596	49405657	Chr1	49490681	49491568	5
Chr1	49404597	49405331	Chr1	49608753	49609331	2
Chr1	49404600	49405146	Chr1	49417357	49418281	2
Chr1	49404797	49405434	Chr1	49506991	49507544	2
Chr1	49404880	49405477	Chr1	49446178	49447247	4
Chr1	49430555	49431497	Chr1	49439284	49440152	2
Chr1	49439054	49439980	Chr1	49656531	49657091	2
Chr1	49439092	49439907	Chr1	50151606	50152136	2
Chr1	49439113	49439686	Chr1	50050658	50051618	2
Chr1	49439197	49440036	Chr1	49806178	49806731	2
Chr1	49439222	49440059	Chr1	49481716	49482472	2
Chr1	49439282	49439860	Chr6	109085538	109086509	2
Chr1	49439285	49440095	Chr1	49490705	49491818	3
Chr1	49439347	49440132	Chr1	49503033	49503724	3
Chr1	49439382	49440118	Chr1	49642300	49642802	2
Chr1	49439569	49440090	Chr1	50160009	50160675	2
Chr1	49443870	49444420	Chr1	49656557	49657207	3
Chr1	49443900	49444925	Chr1	49490731	49491443	3
Chr1	49444032	49444866	Chr1	49492026	49492677	2
Chr1	49446460	49447065	Chr1	50159982	50160847	2
Chr1	49478962	49479755	Chr1	49490653	49491586	2
Chr1	49490243	49491142	Chr1	49528847	49529679	2
Chr1	49490824	49491463	Chr1	49502976	49503813	2
Chr1	49490837	49491589	Chr1	49929371	49930095	3
Chr1	49573173	49573705	Chr1	49929552	49930325	2
Chr1	49614672	49615496	Chr1	49639137	49639669	2
Chr1	49639053	49639683	Chr1	49656790	49657398	2
Chr1	49642152	49642853	Chr1	49656251	49657207	2
Chr1	49651740	49652257	Chr1	49812155	49812789	2
Chr1	49656401	49657157	Chr1	49929369	49930013	3
Chr1	49656653	49657325	Chr1	50160229	50160956	2
Chr1	49656955	49657804	Chr1	49811883	49812793	2
Chr1	49803115	49804013	Chr1	49930372	49931027	2
Chr1	49812192	49813159	Chr1	49929337	49930246	4
Chr1	49812368	49813078	Chr1	50050152	50050667	2
Chr1	49812560	49813060	Chr1	49930572	49931197	2
Chr1	49898195	49898737	Chr1	49929424	49930277	2
Chr1	49930268	49930809	Chr1	50049824	50050578	2
Chr1	49930699	49931477	Chr1	50160066	50160852	2
Chr1	50080424	50081304	Chr1	50104857	50105578	2
Chr1	50105525	50106377	Chr1	50161982	50162892	2
Chr1	50151473	50152555	Chr1	50161464	50163085	5
Chr1	50151584	50152506	Chr1	50160360	50160860	2
Chr1	50162230	50162964	Chr1	52414291	52414989	2
Chr1	50562981	50563507	Chr1	50588359	50589343	2
Chr1	50565737	50566313	Chr1	50588941	50589529	2
Chr1	50575290	50576051	Chr1	50588588	50589236	2
Chr1	50575361	50575963	Chr1	50625881	50626491	2
Chr1	50588748	50589410	Chr1	50675416	50676018	4
Chr1	50588829	50589383	Chr1	50600484	50601429	2
Chr1	50589034	50589695	Chr1	50626054	50626776	3
Chr1	50620070	50620605	Chr1	50630461	50630974	2
Chr1	51085906	51086731	Chr1	51099223	51100034	2
Chr1	51098787	51100102	Chr1	51166989	51167996	8
Chr1	51099160	51100012	Chr1	51132217	51133124	5
Chr1	51099195	51100137	Chr1	51130606	51131669	4
Chr1	51099542	51100151	Chr1	51294751	51295423	2
Chr1	51130914	51131428	Chr1	51167261	51167905	2
Chr1	51132224	51133169	Chr1	51167385	51168088	2
Chr1	51416295	51416906	Chr1	51425743	51426590	2
Chr1	51700485	51701448	Chr1	51794584	51795085	2
Chr1	51762875	51763649	Chr1	51772375	51773023	2
Chr1	51772640	51773244	Chr1	51795023	51795570	2
Chr1	51932402	51933259	Chr1	51952938	51953504	2
Chr1	51972046	51972822	Chr1	51983481	51984283	2
Chr1	52017177	52018163	Chr1	52033044	52034035	10
Chr1	52017196	52017733	Chr1	52025543	52026091	2
Chr1	52025149	52026015	Chr1	52134737	52135709	2
Chr1	52025492	52026237	Chr1	52047046	52047798	2
Chr1	52032906	52033949	Chr1	52046999	52047999	3
Chr1	52032931	52033729	Chr1	52134438	52135305	4
Chr1	52033028	52033894	Chr1	52355666	52356176	2
Chr1	52119743	52120396	Chr1	52134613	52135318	3
Chr1	52134437	52135266	Chr1	52152046	52152910	3
Chr1	52302734	52303526	Chr12	51107144	51107706	2
Chr1	52305198	52305738	Chr1	52413793	52414559	2
Chr1	52355430	52356064	Chr1	53128157	53129088	2
Chr1	52355478	52356611	Chr1	52413878	52415050	7
Chr1	52372680	52373505	Chr1	52414149	52414811	2
Chr1	52378221	52379305	Chr1	52414006	52414944	8
Chr1	52414046	52414820	Chr14	33033754	33034660	2
Chr1	52537100	52537648	Chr1	52774521	52775021	2
Chr1	52623406	52624056	Chr1	52645465	52645988	2
Chr1	52645566	52646082	Chr1	52657525	52658058	2
Chr1	52657558	52658685	Chr1	52728847	52730038	4
Chr1	52772275	52772898	Chr1	52800083	52800620	2
Chr1	52774136	52774743	Chr1	52783766	52784496	2
Chr1	53073000	53073839	Chr1	53128078	53128860	2
Chr1	53079204	53080106	Chr1	53128348	53129077	3
Chr1	53134972	53135878	Chr1	53144256	53144769	2
Chr1	53393379	53394484	Chr1	53405712	53406360	3
Chr1	53428331	53428976	Chr1	53637264	53638186	2
Chr1	53433149	53433934	Chr1	53572961	53573810	3
Chr1	53518799	53519334	Chr1	53637427	53637964	2
Chr1	53572935	53573951	Chr1	53642254	53642896	5
Chr1	53576179	53577137	Chr1	53637367	53638183	2
Chr1	53955810	53956677	Chr1	54129466	54130011	2
Chr1	54128476	54129460	Chr1	54174257	54175179	2
Chr1	54128839	54129561	Chr1	54261554	54262252	2
Chr1	54129075	54130044	Chr1	54171942	54172940	9
Chr1	54129113	54129788	Chr1	54138442	54139231	2
Chr1	54171893	54172960	Chr1	54266750	54267859	5
Chr1	54172006	54172933	Chr1	54219908	54220670	2
Chr1	54172036	54172943	Chr1	54261616	54262686	10
Chr1	54172347	54173043	Chr1	54218499	54219341	2
Chr1	54174600	54175272	Chr1	54266960	54267798	2
Chr1	54219534	54220251	Chr1	54261692	54262308	2
Chr1	54364614	54365299	Chr1	54408342	54408946	3
Chr1	54364649	54365481	Chr1	54396832	54397402	2
Chr1	54422222	54422760	Chr1	54495055	54495950	2
Chr1	54553891	54554418	Chr1	54583523	54584434	2
Chr1	54731676	54732585	Chr1	54744037	54744753	3
Chr1	54731947	54732455	Chr1	54759650	54760199	2
Chr1	54743871	54744563	Chr1	54752672	54753618	3
Chr1	54764249	54764828	Chr1	54780400	54781118	2
Chr1	54768352	54769182	Chr1	54780366	54780896	2
Chr1	54780466	54780985	Chr1	54793349	54794273	2
Chr1	54850767	54851473	Chr1	54868027	54868967	2
Chr1	54850791	54851425	Chr1	54867188	54867836	2
Chr1	55029839	55030505	Chr1	55081093	55081714	2
Chr1	55347816	55348730	Chr1	55393161	55393664	2
Chr1	55353730	55354891	Chr1	55370123	55371126	11
Chr1	55353835	55354780	Chr1	55393273	55393838	2
Chr1	55353938	55354491	Chr1	55452800	55453305	2
Chr1	55369887	55371114	Chr1	55392873	55393736	5
Chr1	55370292	55370798	Chr8	39689287	39689844	2
Chr1	55392956	55393842	Chr1	55442274	55443204	2
Chr1	55393136	55393762	Chr1	55452878	55453832	2
Chr1	55415708	55416479	Chr1	55461889	55462875	2
Chr1	55438892	55439586	Chr1	55452875	55453558	2
Chr1	55441768	55443195	Chr1	55452821	55453792	10
Chr1	55443389	55444194	Chr1	55453024	55453849	7
Chr1	55452802	55453543	Chr4	83647457	83648049	2
Chr1	55545197	55546059	Chr1	55571255	55571858	2
Chr1	55772940	55773719	Chr1	55822355	55822942	2
Chr1	55773986	55774994	Chr1	56567250	56568029	3
Chr1	55774002	55774925	Chr1	55822295	55822927	4
Chr1	55820082	55820618	Chr1	56961945	56962451	2
Chr1	55822011	55822846	Chr1	55846580	55847400	2
Chr1	55822462	55822997	Chr1	56705671	56706366	2
Chr1	55929392	55930175	Chr1	55940360	55941473	4
Chr1	55940135	55940730	Chr1	56705200	56706226	3
Chr1	55940222	55941031	Chr1	56501674	56502211	2
Chr1	55940438	55941010	Chr1	56384230	56384867	2
Chr1	56041385	56042176	Chr1	56611988	56612698	2
Chr1	56058734	56059446	Chr1	56385399	56386068	2
Chr1	56058816	56059816	Chr1	56566691	56567943	3
Chr1	56058872	56059671	Chr1	56067494	56068075	2
Chr1	56148922	56150320	Chr1	56159900	56160717	6
Chr1	56369082	56369583	Chr1	56384484	56385119	2
Chr1	56384033	56384697	Chr1	56431291	56431899	2
Chr1	56384212	56385117	Chr1	56567380	56567911	2
Chr1	56384234	56384856	Chr1	56611963	56612789	4
Chr1	56384318	56384854	Chr1	56447132	56448052	2
Chr1	56384375	56385021	Chr1	56501906	56502565	3
Chr1	56384388	56385007	Chr1	56705358	56706148	4
Chr1	56384476	56385191	Chr1	57278254	57278940	2
Chr1	56385394	56386308	Chr1	56705359	56705911	2
Chr1	56385478	56386123	Chr1	56567551	56568053	2
Chr1	56501050	56502096	Chr1	56705197	56706312	3
Chr1	56501134	56502530	Chr1	56567293	56568553	5
Chr1	56501501	56502436	Chr1	56510907	56512127	4
Chr1	56501973	56502729	Chr1	56838071	56838809	2
Chr1	56566310	56567936	Chr1	56611475	56612773	5
Chr1	56567117	56568496	Chr1	56705358	56706367	9
Chr1	56567356	56567966	Chr1	56688887	56689562	2
Chr1	56611870	56612638	Chr1	56688647	56689523	2
Chr1	56611910	56612897	Chr1	56705213	56706241	6
Chr1	56612263	56612852	Chr1	56961537	56962420	2
Chr1	56618851	56619430	Chr1	56705599	56706240	2
Chr1	56688717	56689595	Chr1	56705309	56706247	10
Chr1	56705300	56706177	Chr1	56815509	56816153	2
Chr1	56705372	56706220	Chr1	56838007	56838983	2
Chr1	56705408	56706069	Chr1	57038633	57039656	3
Chr1	56705432	56706302	Chr1	56863440	56864190	3
Chr1	56705524	56706225	Chr1	56961570	56962487	4
Chr1	56828907	56829517	Chr1	56863346	56864093	3
Chr1	56881395	56882338	Chr1	57039022	57039524	2
Chr1	56961630	56962454	Chr1	57038672	57039587	4
Chr1	57008847	57009695	Chr1	57038642	57039432	2
Chr1	57013395	57013938	Chr1	57023694	57024222	2
Chr1	57023492	57024442	Chr1	57038785	57039966	3
Chr1	57076616	57077363	Chr1	57090928	57091818	2
Chr1	57091300	57091823	Chr1	57253640	57254456	2
Chr1	57104796	57105675	Chr1	57253661	57254444	2
Chr1	57253386	57254819	Chr1	57277889	57279587	18
Chr1	57253868	57254417	Chr1	57284379	57285205	2
Chr1	57253885	57254490	Chr1	58610603	58611114	2
Chr1	57253902	57254473	Chr1	57926456	57926995	2
Chr1	57253979	57254838	Chr1	57276325	57277275	2
Chr1	57253988	57254760	Chr1	57766677	57767655	2
Chr1	57254425	57254945	Chr1	57274272	57274883	2
Chr1	57278265	57279003	Chr1	57766586	57767416	2
Chr1	57323945	57324767	Chr1	57332945	57333648	2
Chr1	57325075	57325727	Chr1	57767071	57767584	2
Chr1	57496677	57497938	Chr1	57506035	57507004	3
Chr1	57520682	57521872	Chr1	57531085	57532252	3
Chr1	57530477	57531443	Chr1	57628237	57628916	2
Chr1	57530819	57531568	Chr1	57766783	57767601	2
Chr1	57615599	57616547	Chr1	57702447	57703061	2
Chr1	57616020	57616844	Chr1	57628340	57628870	2
Chr1	57616207	57616742	Chr1	57766683	57767496	2
Chr1	57651598	57652317	Chr1	57702563	57703270	2
Chr1	57651612	57652191	Chr1	57766430	57767238	2
Chr1	57702557	57703455	Chr1	57717947	57718738	2
Chr1	57718016	57718633	Chr1	57730756	57731337	2
Chr1	57718069	57718792	Chr1	57766982	57767572	2
Chr1	57766363	57767551	Chr1	57977943	57978664	4
Chr1	57766537	57767185	Chr7	77356635	77357402	2
Chr1	57766592	57767572	Chr1	57873478	57874326	3
Chr1	57766743	57767386	Chr2	172953133	172953701	2
Chr1	57766974	57767568	Chr1	58585142	58585736	2
Chr1	57766993	57767517	Chr1	58138982	58139741	2
Chr1	57873407	57873952	Chr1	57978102	57978687	2
Chr1	57917353	57918132	Chr1	57926734	57927328	2
Chr1	57917467	57918107	Chr1	57925548	57926122	2
Chr1	57926877	57927662	Chr1	57977851	57978807	2
Chr1	57930124	57931024	Chr1	57977762	57978713	3
Chr1	57960080	57961041	Chr1	57977867	57978831	13
Chr1	57977755	57978616	Chr1	58053781	58054647	3
Chr1	57977972	57978617	Chr1	57986416	57987019	2
Chr1	57978129	57978742	Chr1	58007546	58008363	2
Chr1	57978164	57978709	Chr1	58649000	58649992	2
Chr1	58053446	58054388	Chr1	58138809	58139453	2
Chr1	58537779	58538731	Chr1	58621872	58622627	2
Chr1	58537876	58538783	Chr1	58618390	58619439	3
Chr1	58538088	58538665	Chr1	58610510	58611028	3
Chr1	58540168	58540676	Chr1	58576895	58577450	2
Chr1	58556053	58556769	Chr1	58610508	58611031	2
Chr1	58576878	58577605	Chr1	58610086	58610680	2
Chr1	58576883	58577498	Chr1	58654485	58654987	2
Chr1	58576988	58577950	Chr1	58589039	58589715	2
Chr1	58584366	58585225	Chr1	58760354	58760962	2
Chr1	58584492	58585461	Chr1	58618622	58619384	2
Chr1	58584563	58585580	Chr1	58654227	58655024	3
Chr1	58584583	58585223	Chr1	58648395	58649338	2
Chr1	58588681	58589737	Chr1	58610157	58610978	3
Chr1	58609779	58610670	Chr1	58665086	58665616	2
Chr1	58610030	58611206	Chr1	58618510	58619629	16
Chr1	58610104	58611017	Chr1	58621995	58622766	3
Chr1	58610108	58610977	Chr1	58653991	58655210	4
Chr1	58610191	58611344	Chr1	58648523	58649590	6
Chr1	58610489	58611008	Chr1	58760421	58760998	2
Chr1	58618447	58619319	Chr1	58654146	58655118	2
Chr1	58618604	58619393	Chr1	58649025	58649615	2
Chr1	58621980	58622837	Chr1	58647873	58649233	3
Chr1	58648600	58649287	Chr1	58781816	58782618	2
Chr1	58648705	58649492	Chr1	58911951	58912694	2
Chr1	58648787	58649642	Chr1	58769996	58770993	5
Chr1	58648852	58649559	Chr1	59049608	59050195	2
Chr1	58649016	58649541	Chr1	58760589	58761109	2
Chr1	58649107	58649846	Chr1	58703113	58703851	2
Chr1	58649540	58650352	Chr1	58783051	58783741	2
Chr1	58654017	58654914	Chr1	58670374	58670966	2
Chr1	58654073	58654871	Chr1	58999375	58999915	2
Chr1	58654094	58654928	Chr1	58664812	58665549	5
Chr1	58654205	58654743	Chr1	58783332	58784227	3
Chr1	58654245	58655053	Chr1	58769770	58770663	4
Chr1	58659675	58660453	Chr1	58760379	58761025	2
Chr1	58670172	58670895	Chr1	58769642	58770607	3
Chr1	58760088	58761164	Chr1	58769727	58770707	9
Chr1	58760296	58761164	Chr1	58999309	58999832	2
Chr1	58769416	58770736	Chr1	58783214	58784058	6
Chr1	58769440	58770410	Chr9	127152979	127153635	2
Chr1	58769656	58770622	Chr1	58999298	58999913	2
Chr1	58769929	58770608	Chr1	58911742	58912451	2
Chr1	58783147	58783710	Chr1	58819687	58820777	3
Chr1	58999180	58999681	Chr1	59012560	59013270	2
Chr1	59218655	59219478	Chr1	59245466	59245973	2
Chr1	59218684	59219258	Chr1	60216638	60217549	2
Chr1	59245512	59246071	Chr1	59387644	59388183	2
Chr1	59246860	59247770	Chr1	59447907	59448948	4
Chr1	59247123	59247766	Chr1	60151670	60152623	2
Chr1	59250850	59251369	Chr1	59527377	59528295	2
Chr1	59266012	59266678	Chr1	59387735	59388382	2
Chr1	59369221	59369923	Chr1	59441916	59442596	2
Chr1	59377228	59377889	Chr1	59408050	59408742	2
Chr1	59387599	59388646	Chr1	59441739	59442664	11
Chr1	59387608	59388595	Chr1	59604306	59604991	2
Chr1	59387667	59389203	Chr1	59447989	59448908	7
Chr1	59387677	59388216	Chr1	59609834	59610652	2
Chr1	59387777	59388458	Chr1	59536867	59537745	3
Chr1	59387802	59388512	Chr1	60151867	60152412	2
Chr1	59387843	59388738	Chr1	59408438	59409328	4
Chr1	59430220	59431058	Chr1	59526933	59527870	2
Chr1	59441777	59442605	Chr1	59536560	59537371	2
Chr1	59441811	59442345	Chr1	59527190	59527740	2
Chr1	59441889	59442394	Chr1	59707856	59708676	3
Chr1	59448001	59448681	Chr1	59536682	59537466	2
Chr1	59526933	59528286	Chr1	59569716	59570626	4
Chr1	59527240	59527980	Chr1	60151831	60152539	2
Chr1	59527313	59527847	Chr14	72564834	72565348	2
Chr1	59527406	59528183	Chr1	59587020	59587994	2
Chr1	59527730	59528285	Chr1	60061370	60061908	2
Chr1	59536754	59537576	Chr1	59609829	59610355	2
Chr1	59569760	59570583	Chr1	59603999	59604509	2
Chr1	59569786	59570326	Chr1	59708169	59708779	2
Chr1	59569850	59570627	Chr1	59581226	59582135	2
Chr1	59570040	59570702	Chr1	59609695	59610320	2
Chr1	59571671	59572481	Chr1	59581050	59581878	4
Chr1	59597874	59598666	Chr1	60152075	60152610	2
Chr1	59708054	59708724	Chr1	60097090	60097855	2
Chr1	59708083	59709060	Chr1	59726937	59727996	4
Chr1	59708121	59709296	Chr1	59751950	59752782	4
Chr1	59752106	59752708	Chr13	111193412	111193975	2
Chr1	59917519	59918126	Chr1	59964990	59965916	2
Chr1	59982401	59983079	Chr1	60061671	60062184	2
Chr1	60035965	60036818	Chr1	60063167	60063699	2
Chr1	60036217	60036780	Chr1	60058825	60059409	2
Chr1	60061077	60062110	Chr1	60096777	60097934	7
Chr1	60061302	60062180	Chr4	69828432	69829395	2
Chr1	60061362	60062160	Chr1	60208913	60209888	3
Chr1	60061412	60062143	Chr1	60073177	60074061	2
Chr1	60061421	60062074	Chr1	60161398	60161987	2
Chr1	60061712	60062309	Chr1	60164176	60165034	2
Chr1	60097336	60097916	Chr1	60151712	60152495	3
Chr1	60136150	60136844	Chr1	60151672	60152520	2
Chr1	60151517	60152067	Chr1	60161868	60162499	2
Chr1	60151654	60152454	Chr1	60208985	60209592	2
Chr1	60182394	60183376	Chr1	60241009	60241764	3
Chr1	60182473	60183221	Chr1	60217004	60217665	2
Chr1	60182509	60183331	Chr1	60208926	60209769	4
Chr1	60182521	60183521	Chr1	60195233	60196079	4
Chr1	60195142	60196006	Chr1	60203581	60204466	2
Chr1	60207987	60208923	Chr1	60216725	60217574	4
Chr1	60222867	60223662	Chr1	60240829	60241367	2
Chr1	60240708	60241694	Chr1	60268989	60270216	4
Chr1	60240957	60241595	Chr1	60322874	60323916	3
Chr1	60322281	60322895	Chr1	60414800	60415692	3
Chr1	60322969	60323829	Chr1	60407034	60407542	2
Chr1	60344509	60345581	Chr1	60412703	60413347	4
Chr1	60358015	60358541	Chr1	60411412	60412101	2
Chr1	60368646	60369550	Chr1	60411939	60413570	4
Chr1	60375680	60376624	Chr1	60406988	60407784	2
Chr1	60414774	60415614	Chr1	60438348	60439228	2
Chr1	60438170	60438820	Chr1	60576053	60577002	2
Chr1	60438280	60439285	Chr1	60499633	60500595	6
Chr1	60438295	60439339	Chr1	60893674	60894491	3
Chr1	60438318	60438850	Chr1	62105964	62106899	3
Chr1	60438352	60439413	Chr1	60554215	60555309	6
Chr1	60438370	60439450	Chr1	60740018	60740986	10
Chr1	60438486	60439129	Chr1	61818654	61819238	2
Chr1	60438493	60439132	Chr1	60840092	60840900	2
Chr1	60438505	60439220	Chr1	60559672	60560826	3
Chr1	60438510	60439244	Chr1	60568249	60569383	6
Chr1	60438524	60439132	Chr1	60563525	60564064	2
Chr1	60438564	60439332	Chr1	61598486	61599115	2
Chr1	60444339	60444965	Chr1	60740265	60741077	2
Chr1	60499583	60500518	Chr1	60563386	60563979	2
Chr1	60499643	60500863	Chr1	60517726	60519532	9
Chr1	60554107	60555041	Chr1	60616760	60617592	3
Chr1	60554137	60555077	Chr1	60740122	60741013	5
Chr1	60554156	60555052	Chr1	60568498	60569487	4
Chr1	60554294	60555023	Chr1	60576014	60576866	2
Chr1	60554467	60555141	Chr1	60746804	60747309	2
Chr1	60554527	60555368	Chr1	60563182	60563888	2
Chr1	60559182	60559807	Chr1	60568083	60568741	2
Chr1	60559851	60561028	Chr1	60568054	60569134	7
Chr1	60559948	60560617	Chr1	60573739	60574356	2
Chr1	60563067	60564298	Chr1	60573682	60574617	3
Chr1	60563085	60563926	Chr1	60576061	60576877	2
Chr1	60563121	60563696	Chr1	60740121	60741049	3
Chr1	60563143	60563984	Chr1	60815992	60816587	2
Chr1	60568059	60568821	Chr1	60740220	60740924	2
Chr1	60609762	60610692	Chr1	60740308	60741086	2
Chr1	60614647	60615549	Chr1	60740168	60741079	2
Chr1	60740131	60740991	Chr19	51574231	51574796	2
Chr1	60740283	60740812	Chr1	60893599	60894354	2
Chr1	60740510	60741103	Chr1	60816407	60816910	2
Chr1	60815466	60816888	Chr1	60840001	60841085	8
Chr1	60815977	60816863	Chr1	60893610	60894390	5
Chr1	60820368	60820872	Chr1	60840296	60840956	2
Chr1	60839881	60840441	Chr1	60854768	60855626	2
Chr1	60840099	60840643	Chr1	60893664	60894441	2
Chr1	60872987	60873973	Chr1	60893468	60894454	4
Chr1	60881144	60881967	Chr1	60893613	60894295	2
Chr1	60893789	60894456	Chr1	61038418	61039337	3
Chr1	60955006	60955822	Chr1	61013419	61014136	2
Chr1	61013399	61014165	Chr1	61085507	61086253	3
Chr1	61038609	61039587	Chr1	61085346	61086279	3
Chr1	61085377	61086377	Chr1	61102394	61103319	4
Chr1	61113295	61114280	Chr15	36712691	36713518	2
Chr1	61519886	61520768	Chr1	61647768	61648314	2
Chr1	61520255	61521251	Chr1	61743627	61744548	3
Chr1	61528101	61529078	Chr1	61547427	61547960	2
Chr1	61547310	61548263	Chr1	61647795	61648354	2
Chr1	61547349	61548344	Chr1	61598593	61599364	8
Chr1	61549288	61549860	Chr1	61647627	61648562	2
Chr1	61568458	61569028	Chr1	61598780	61599412	2
Chr1	61582441	61583314	Chr1	61598341	61599286	2
Chr1	61598336	61599612	Chr1	61647458	61648393	6
Chr1	61598550	61599331	Chr1	62104104	62104614	2
Chr1	61598556	61599440	Chr1	61608330	61609001	3
Chr1	61598587	61599598	Chr1	61818712	61819602	6
Chr1	61598595	61599360	Chr1	61648852	61650622	6
Chr1	61598656	61599615	Chr1	61781323	61782076	4
Chr1	61598702	61599560	Chr1	62105831	62106889	5
Chr1	61598713	61599544	Chr1	61767093	61767799	3
Chr1	61598748	61599321	Chr1	61785102	61785935	2
Chr1	61598749	61599583	Chr1	62034104	62034858	4
Chr1	61598752	61599432	Chr12	52520162	52521154	2
Chr1	61608650	61609975	Chr1	61647587	61648564	3
Chr1	61636009	61636789	Chr1	61649160	61649747	2
Chr1	61647484	61648425	Chr1	61743601	61744617	5
Chr1	61647582	61648245	Chr1	62290911	62291531	2
Chr1	61647867	61648425	Chr1	61803910	61804784	2
Chr1	61648853	61649810	Chr1	62106027	62106922	2
Chr1	61649749	61650443	Chr1	62103821	62104486	2
Chr1	61690072	61690765	Chr1	62106221	62107135	2
Chr1	61707071	61707848	Chr1	62106468	62107239	2
Chr1	61743534	61744111	Chr1	61818782	61819606	2
Chr1	61743861	61744560	Chr1	61767341	61768209	2
Chr1	61758604	61759647	Chr1	61767276	61768187	4
Chr1	61758701	61759438	Chr1	61781276	61781894	2
Chr1	61765289	61765794	Chr1	61818760	61819574	2
Chr1	61767077	61767956	Chr1	61785364	61786112	2
Chr1	61767252	61768012	Chr1	61780970	61781811	6
Chr1	61767434	61767978	Chr1	61781985	61782669	2
Chr1	61781190	61782295	Chr1	61818891	61819637	3
Chr1	61788260	61789119	Chr1	62106061	62106888	2
Chr1	61818710	61819240	Chr1	61857605	61858109	2
Chr1	61818730	61819650	Chr1	61889650	61890608	2
Chr1	61818757	61819287	Chr1	62033888	62034637	3
Chr1	61819105	61820120	Chr1	62105956	62107243	4
Chr1	61819143	61820130	Chr7	90994457	90995075	2
Chr1	61857268	61858096	Chr1	62034390	62035052	2
Chr1	61971010	61971699	Chr1	62103994	62104713	2
Chr1	62033966	62035104	Chr1	62106122	62107216	7
Chr1	62033994	62035148	Chr1	62104608	62106019	3
Chr1	62034095	62034886	Chr1	62103895	62104563	2
Chr1	62034221	62034794	Chr1	62067175	62067952	2
Chr1	62056716	62057423	Chr1	62105952	62106849	2
Chr1	62103738	62104560	Chr1	62190667	62191399	2
Chr1	62105538	62107068	Chr1	62165683	62166906	10
Chr1	62106204	62107098	Chr1	62301975	62302946	3
Chr1	62106335	62106880	Chr1	62290853	62291518	2
Chr1	62108126	62108733	Chr1	62165801	62166416	2
Chr1	62108196	62109107	Chr1	62317342	62318233	2
Chr1	62157600	62158356	Chr1	62165824	62166610	2
Chr1	62165824	62166426	Chr1	62312964	62313644	2
Chr1	62166037	62166763	Chr1	62190573	62191361	2
Chr1	62271556	62272098	Chr1	62290706	62291310	2
Chr1	62290802	62291747	Chr1	62302191	62302969	3
Chr1	62302188	62303027	Chr1	62317712	62318264	2
Chr1	62302383	62302998	Chr8	118284088	118284608	2
Chr1	62733342	62734004	Chr1	62744468	62745021	2
Chr1	62784188	62785128	Chr1	62807228	62807750	2
Chr1	62977350	62978007	Chr1	63172708	63173431	2
Chr1	62996064	62996869	Chr1	63211733	63212586	2
Chr1	62996199	62997034	Chr1	63066556	63067201	2
Chr1	63004761	63005271	Chr1	63066196	63066930	2
Chr1	63030002	63030640	Chr1	63066125	63066779	2
Chr1	63059414	63060313	Chr1	63125082	63125687	2
Chr1	63066098	63067091	Chr1	63125112	63126008	3
Chr1	63066189	63066702	Chr1	65416385	65417100	2
Chr1	63066295	63067429	Chr1	63079281	63080191	3
Chr1	63066427	63067253	Chr1	63172785	63173762	4
Chr1	63102791	63103432	Chr1	63125141	63125865	2
Chr1	63102888	63103577	Chr1	63172798	63173788	2
Chr1	63125262	63125913	Chr1	63156122	63156699	2
Chr1	63125313	63125822	Chr1	63945647	63946293	2
Chr1	63156576	63157542	Chr1	63172806	63173525	4
Chr1	63172892	63173437	Chr1	63182091	63182893	2
Chr1	63341415	63342005	Chr1	63369875	63370594	2
Chr1	63469758	63470491	Chr1	63945678	63946586	2
Chr1	63702217	63702737	Chr3	82105211	82105712	2
Chr1	63721219	63722100	Chr1	63735112	63735649	2
Chr1	63906055	63907452	Chr1	63945667	63946467	7
Chr1	63945586	63946334	Chr1	63963568	63964532	5
Chr1	63945874	63946493	Chr1	64020842	64021684	2
Chr1	63952926	63954434	Chr1	63963311	63964631	9
Chr1	64139778	64140743	Chr1	64707184	64707755	2
Chr1	64140060	64140759	Chr1	64708171	64708848	3
Chr1	64157796	64158303	Chr1	64166798	64167390	2
Chr1	64157878	64158448	Chr1	64378159	64378815	2
Chr1	64166597	64167540	Chr1	64627203	64628146	3
Chr1	64166628	64167379	Chr1	64220675	64221223	2
Chr1	64166646	64167803	Chr1	64197070	64197932	4
Chr1	64166774	64167534	Chr1	64377992	64378822	3
Chr1	64195489	64196156	Chr1	64449276	64450006	4
Chr1	64195832	64196598	Chr1	64253290	64253974	2
Chr1	64197147	64197976	Chr1	64220704	64221602	3
Chr1	64220626	64221188	Chr1	64378050	64378857	2
Chr1	64240225	64241195	Chr1	64253512	64254254	2
Chr1	64241118	64241836	Chr1	64377539	64378694	3
Chr1	64248966	64249698	Chr1	64367161	64367888	2
Chr1	64253413	64254172	Chr1	64367297	64368104	2
Chr1	64253430	64254099	Chr1	64282785	64283698	2
Chr1	64254449	64255127	Chr1	64378020	64378805	2
Chr1	64254805	64255410	Chr1	64394077	64394657	2
Chr1	64282885	64283698	Chr1	64394099	64394936	2
Chr1	64346127	64347052	Chr1	64377918	64378773	3
Chr1	64347630	64348348	Chr1	64394374	64394915	2
Chr1	64358194	64359207	Chr1	64394175	64395019	3
Chr1	64358449	64359532	Chr1	64378056	64379221	6
Chr1	64367146	64367977	Chr1	64382047	64382672	2
Chr1	64367172	64368027	Chr1	64377827	64379045	8
Chr1	64371626	64372544	Chr1	64394197	64395040	3
Chr1	64371876	64372454	Chr1	64627278	64628069	2
Chr1	64377835	64378788	Chr1	65420597	65421407	3
Chr1	64377917	64378911	Chr1	64394086	64396124	20
Chr1	64377923	64378928	Chr1	64413439	64414445	9
Chr1	64377926	64378683	Chr1	65057255	65057846	2
Chr1	64377946	64379220	Chr1	64448716	64450138	21
Chr1	64377992	64378881	Chr1	64627239	64628098	3
Chr1	64378005	64378843	Chr1	64386659	64387664	5
Chr1	64378033	64378811	Chr1	64400691	64401517	3
Chr1	64378089	64378835	Chr1	64508414	64509014	3
Chr1	64378155	64378812	Chr1	64708451	64709444	2
Chr1	64378367	64379067	Chr1	64440936	64441699	2
Chr1	64379985	64380596	Chr1	64393999	64394732	2
Chr1	64381860	64382634	Chr1	64393994	64394878	8
Chr1	64381897	64382778	Chr1	64449082	64450028	7
Chr1	64382063	64382954	Chr1	64637936	64638825	3
Chr1	64382108	64382660	Chr1	64413692	64414242	2
Chr1	64386469	64387367	Chr1	64449549	64450136	2
Chr1	64394042	64395051	Chr1	64413607	64414363	4
Chr1	64394073	64395189	Chr1	64449023	64450163	7
Chr1	64394075	64394833	Chr1	64575710	64576216	2
Chr1	64394089	64394638	Chr1	64605400	64606137	2
Chr1	64394189	64395257	Chr1	64440898	64441845	3
Chr1	64394295	64395237	Chr2	150956479	150957183	2
Chr1	64394321	64395035	Chr1	64637942	64638664	3
Chr1	64394532	64395048	Chr1	64471988	64472735	2
Chr1	64394550	64395095	Chr1	64627052	64627944	4
Chr1	64400656	64401512	Chr1	64627315	64627931	2
Chr1	64400747	64401495	Chr1	64449186	64450069	3
Chr1	64413231	64414414	Chr1	64449080	64450067	10
Chr1	64440884	64441723	Chr1	64449226	64450070	5
Chr1	64446961	64447950	Chr1	64508106	64508999	2
Chr1	64449124	64450090	Chr1	64507919	64508797	5
Chr1	64449132	64449927	Chr1	64463833	64464422	2
Chr1	64449138	64449877	Chr1	64627224	64628094	4
Chr1	64449270	64450122	Chr1	64472166	64473057	8
Chr1	64449282	64450056	Chr1	64637950	64638700	2
Chr1	64453117	64454058	Chr1	64472508	64473337	2
Chr1	64507986	64508919	Chr1	64541550	64542176	2
Chr1	64575283	64576230	Chr1	64627360	64628092	3
Chr1	64627137	64628552	Chr1	64637842	64638823	8
Chr1	64627178	64627825	Chr1	64710753	64711663	3
Chr1	64786805	64787475	Chr1	64961202	64962298	3
Chr1	64787026	64788018	Chr1	65338303	65339217	2
Chr1	64806036	64806909	Chr1	64835499	64836491	4
Chr1	64806215	64807084	Chr1	64960996	64961903	3
Chr1	64806252	64806797	Chr1	65416347	65417025	2
Chr1	64806264	64807066	Chr1	65002090	65002608	2
Chr1	64808885	64809698	Chr1	65061382	65062034	2
Chr1	64809826	64810389	Chr1	64961570	64962297	2
Chr1	64835655	64836540	Chr1	65001481	65002290	2
Chr1	64835861	64836428	Chr1	65420603	65421245	2
Chr1	64935531	64936348	Chr1	64961293	64962068	2
Chr1	64939716	64940985	Chr1	64961251	64962157	10
Chr1	64940019	64940533	Chr1	64982535	64983305	2
Chr1	64940489	64941003	Chr1	65014752	65015625	2
Chr1	64942086	64943117	Chr1	65001627	65002554	3
Chr1	64942332	64943240	Chr1	64961366	64962026	3
Chr1	64960924	64961946	Chr1	65061329	65062521	5
Chr1	64960963	64962276	Chr1	64979944	64980967	8
Chr1	64961030	64962423	Chr1	65001648	65003186	18
Chr1	64961036	64961726	Chr1	64976679	64977246	2
Chr1	64961141	64961930	Chr1	65959430	65960343	2
Chr1	64961312	64962356	Chr1	65420516	65421392	3
Chr1	64961318	64961864	Chr1	64981638	64982507	2
Chr1	64961339	64961895	Chr1	65081166	65081825	2
Chr1	64961358	64962322	Chr1	65029227	65030683	6
Chr1	64961413	64962272	Chr1	65015303	65016253	4
Chr1	64961613	64962169	Chr1	65016431	65017023	2
Chr1	64962752	64963412	Chr1	65152689	65153284	2
Chr1	64964097	64965236	Chr1	65001658	65002447	6
Chr1	64964437	64965447	Chr1	64980003	64980834	6
Chr1	64964521	64965027	Chr1	64982098	64982898	2
Chr1	64964543	64965531	Chr1	64976284	64977283	7
Chr1	64964651	64965356	Chr1	65015597	65016187	5
Chr1	64976470	64977220	Chr1	65015594	65016231	2
Chr1	64976804	64977331	Chr1	65001715	65002324	2
Chr1	64979806	64980802	Chr1	65001404	65002732	8
Chr1	64980154	64980975	Chr1	65000412	65001289	2
Chr1	64981803	64982456	Chr1	65001673	65002196	2
Chr1	65001541	65002751	Chr1	65061412	65062426	7
Chr1	65001595	65002839	Chr1	65015105	65016281	17
Chr1	65001690	65002568	Chr1	65067220	65067819	2
Chr1	65001902	65003311	Chr1	65029415	65031084	6
Chr1	65003031	65003668	Chr1	65015403	65016150	2
Chr1	65015240	65016175	Chr1	65102161	65103032	2
Chr1	65015485	65016182	Chr1	65061425	65062201	2
Chr1	65332176	65332813	Chr1	65416230	65416770	2
Chr1	65337832	65338967	Chr1	65416383	65417230	7
Chr1	65338105	65338645	Chr1	65420861	65421872	3
Chr1	65381671	65382246	Chr1	65416195	65416833	2
Chr1	65405442	65406092	Chr1	65420600	65421365	2
Chr1	65416184	65416841	Chr1	65427279	65427894	2
Chr1	65416260	65416882	Chr1	65425159	65425966	2
Chr1	65416264	65417236	Chr1	66107026	66107535	2
Chr1	65416328	65416926	Chr1	65517492	65518053	2
Chr1	65416631	65417135	Chr1	65949962	65950497	2
Chr1	65420338	65421463	Chr1	66023432	66024568	3
Chr1	65420496	65421051	Chr1	65430950	65431694	2
Chr1	65420571	65421377	Chr11	17298569	17299410	2
Chr1	65517143	65517764	Chr1	65615844	65616676	2
Chr1	65934534	65935456	Chr1	65959362	65960213	3
Chr1	65941477	65942392	Chr1	66106817	66107402	2
Chr1	65941611	65942533	Chr1	65949606	65950686	8
Chr1	65942019	65942565	Chr1	65959358	65960001	2
Chr1	65949597	65950960	Chr1	65958713	65960386	55
Chr1	65949659	65950658	Chr1	66023624	66024593	8
Chr1	65949697	65950623	Chr1	65990457	65991088	3
Chr1	65949706	65950658	Chr1	65975786	65976631	4
Chr1	65949784	65950653	Chr1	66106655	66107579	6
Chr1	65951037	65951958	Chr1	65959285	65960186	5
Chr1	65959138	65960262	Chr1	65992585	65993606	4
Chr1	65959217	65960097	Chr1	65977533	65978887	7
Chr1	65959231	65960242	Chr1	66023068	66024336	6
Chr1	65959296	65960088	Chr1	65975582	65976399	3
Chr1	65959298	65960135	Chr1	66578488	66579280	2
Chr1	65959344	65960170	Chr1	66052004	66052776	2
Chr1	65959367	65960159	Chr1	65976533	65977266	3
Chr1	65959376	65960111	Chr1	66747384	66748013	2
Chr1	65959380	65960236	Chr1	66017220	66017721	2
Chr1	65959395	65960374	Chr1	66052938	66053592	3
Chr1	65975978	65976916	Chr1	66378890	66379550	2
Chr1	65976157	65976712	Chr1	66049937	66050554	2
Chr1	65990250	65991032	Chr1	66023435	66024172	2
Chr1	66023399	66024149	Chr1	66387203	66387972	2
Chr1	66023737	66024301	Chr1	66107068	66107575	2
Chr1	66050057	66050653	Chr1	66106682	66107247	2
Chr1	66153592	66154497	Chr1	66414654	66415167	2
Chr1	66220064	66220934	Chr1	66229509	66230429	5
Chr1	66220288	66220950	Chr1	66386971	66388006	3
Chr1	66223433	66224108	Chr1	66387197	66387703	2
Chr1	66223613	66224179	Chr1	66747346	66748064	3
Chr1	66223656	66224610	Chr1	66378922	66379618	4
Chr1	66223687	66224204	Chr1	66335021	66335554	2
Chr1	66223715	66224699	Chr1	66337774	66338619	2
Chr1	66229454	66230157	Chr1	66379344	66379893	2
Chr1	66300385	66301209	Chr1	66379140	66379864	2
Chr1	66337772	66338491	Chr1	66378667	66379659	2
Chr1	66337778	66338767	Chr1	66422005	66422805	2
Chr1	66338059	66338772	Chr1	66387176	66387714	2
Chr1	66368478	66369629	Chr1	66378705	66379347	4
Chr1	66378463	66379512	Chr1	66386809	66387708	7
Chr1	66378571	66379285	Chr1	66747227	66748073	2
Chr1	66378775	66379478	Chr1	66578353	66579220	2
Chr1	66378775	66379603	Chr1	66412454	66413098	2
Chr1	66412395	66412982	Chr1	66910911	66911434	2
Chr1	66420412	66421025	Chr1	66796989	66797963	3
Chr1	66420787	66421449	Chr13	33693838	33694752	2
Chr1	66430577	66431145	Chr1	66442884	66443861	2
Chr1	66444431	66445411	Chr1	66578445	66579369	4
Chr1	66535355	66535974	Chr1	66579469	66579997	2
Chr1	66536122	66536952	Chr1	66593219	66593911	2
Chr1	66577919	66579277	Chr1	66635106	66635779	7
Chr1	66578166	66579327	Chr1	66657750	66658558	4
Chr1	66578386	66578903	Chr5	135711638	135712195	2
Chr1	66578405	66579279	Chr1	66685245	66685922	2
Chr1	66578595	66579324	Chr1	66747438	66748064	3
Chr1	66578617	66579454	Chr13	103155611	103156324	2
Chr1	66708178	66708929	Chr1	66911705	66912698	2
Chr1	66718712	66719637	Chr1	66819302	66820211	2
Chr1	66718827	66720170	Chr1	66910649	66912443	17
Chr1	66718965	66720613	Chr1	66746967	66748335	21
Chr1	66719067	66719841	Chr1	66822821	66823790	2
Chr1	66719185	66720212	Chr1	66774782	66775888	5
Chr1	66719263	66719963	Chr1	66809706	66810293	2
Chr1	66719265	66719806	Chr1	66745077	66746026	2
Chr1	66719295	66720132	Chr1	66743428	66744822	5
Chr1	66719337	66720000	Chr1	66731666	66732573	3
Chr1	66721836	66722807	Chr1	66743325	66743836	2
Chr1	66721938	66723346	Chr1	66747288	66748129	5
Chr1	66731698	66732618	Chr1	66747040	66747907	3
Chr1	66732738	66733413	Chr1	66744136	66744882	2
Chr1	66743357	66744842	Chr1	66910942	66912264	9
Chr1	66743377	66744088	Chr1	66785589	66786179	2
Chr1	66743448	66744088	Chr1	66834088	66834785	2
Chr1	66743469	66744820	Chr1	66774342	66775202	9
Chr1	66744161	66744714	Chr1	66917616	66918364	2
Chr1	66744166	66744949	Chr1	66781854	66782379	2
Chr1	66744199	66744945	Chr1	66822803	66823767	3
Chr1	66744458	66745014	Chr1	66797101	66797952	2
Chr1	66745054	66745929	Chr1	66774561	66775422	3
Chr1	66746578	66747156	Chr1	66756819	66757320	2
Chr1	66747170	66748182	Chr1	66910825	66911888	17
Chr1	66747197	66747869	Chr1	66756858	66757541	2
Chr1	66747198	66748220	Chr1	66774374	66775783	27
Chr1	66747212	66748061	Chr1	66781872	66782961	5
Chr1	66747245	66747911	Chr1	66917550	66918080	2
Chr1	66747249	66748074	Chr1	67003712	67004649	3
Chr1	66747270	66748244	Chr1	66823241	66824229	3
Chr1	66747446	66748271	Chr1	67211194	67211778	3
Chr1	66748177	66748753	Chr1	66834137	66834833	2
Chr1	66748281	66749192	Chr1	66774277	66775295	3
Chr1	66774354	66775109	Chr1	66910893	66911764	4
Chr1	66774473	66775308	Chr1	66797370	66797878	2
Chr1	66774790	66775490	Chr1	66798768	66799621	3
Chr1	66774795	66775333	Chr1	66823441	66824079	2
Chr1	66796912	66797510	Chr1	66833995	66834928	2
Chr1	66805561	66806235	Chr1	66823600	66824192	2
Chr1	66822630	66823164	Chr1	66911136	66911827	2
Chr1	66823515	66824108	Chr1	66910723	66911404	2
Chr1	66910626	66911425	Chr1	66984193	66984972	3
Chr1	66910915	66911744	Chr1	67003960	67004746	2
Chr1	66916938	66917867	Chr1	67162463	67163115	2
Chr1	66917472	66918394	Chr1	67170371	67171248	3
Chr1	66917649	66918205	Chr1	66984342	66984999	2
Chr1	66917823	66918369	Chr1	67003704	67004552	3
Chr1	67003833	67004668	Chr1	67057856	67058826	3
Chr1	67003940	67004461	Chr1	67050533	67051350	2
Chr1	67057786	67058513	Chr1	67170521	67171533	3
Chr1	67089470	67090106	Chr1	67184974	67185686	2
Chr1	67157799	67158716	Chr1	67170576	67171416	5
Chr1	67162355	67163247	Chr1	67170378	67171473	8
Chr1	67162573	67163348	Chr1	67171752	67172675	2
Chr1	67170493	67171289	Chr1	67203270	67203855	2
Chr1	67170842	67171372	Chr1	67211672	67212411	2
Chr1	67210973	67211687	Chr1	67333186	67333909	3
Chr1	67211289	67212369	Chr1	67398562	67399129	3
Chr1	67243514	67244326	Chr1	67333106	67333855	2
Chr1	67311814	67312480	Chr1	67332941	67333512	2
Chr1	67906858	67907771	Chr1	67936590	67937173	2
Chr1	68027319	68028112	Chr1	68226005	68226558	3
Chr1	68027454	68028017	Chr1	68040602	68041224	2
Chr1	68027547	68028094	Chr1	68049148	68049931	2
Chr1	68037954	68038888	Chr1	68083894	68084690	2
Chr1	68038120	68038939	Chr1	68101086	68101862	2
Chr1	68038251	68038942	Chr1	68181055	68181569	2
Chr1	68038312	68039007	Chr1	68049132	68049994	3
Chr1	68038393	68038925	Chr1	68053773	68054590	2
Chr1	68040487	68041730	Chr1	68100967	68101854	7
Chr1	68040605	68041706	Chr1	68053814	68054427	3
Chr1	68040673	68041647	Chr1	68048954	68049861	4
Chr1	68040862	68041380	Chr1	68062889	68063537	2
Chr1	68045062	68045973	Chr1	68101024	68101885	2
Chr1	68045116	68045949	Chr1	68225740	68226488	3
Chr1	68049013	68049859	Chr1	68101399	68101911	3
Chr1	68049121	68050065	Chr1	68221005	68221884	3
Chr1	68049260	68049914	Chr1	68226351	68226907	2
Chr1	68053939	68054654	Chr1	68062591	68063242	2
Chr1	68054089	68054609	Chr1	68100663	68101596	2
Chr1	68100937	68101796	Chr1	68226025	68226971	4
Chr1	68101034	68101561	Chr1	68134079	68134857	2
Chr1	68101053	68101895	Chr1	68112501	68113050	2
Chr1	68179999	68180714	Chr1	68190516	68191299	3
Chr1	68182636	68183172	Chr1	68190836	68191508	2
Chr1	68185676	68186206	Chr1	68226054	68226891	2
Chr1	68190921	68192227	Chr1	68221088	68221891	3
Chr1	68226286	68226895	Chr17	49054532	49055408	2
Chr1	68315930	68316886	Chr1	68576885	68578048	3
Chr1	68345401	68346216	Chr1	68362423	68362941	2
Chr1	68345487	68346062	Chr1	68467475	68468140	2
Chr1	68585778	68586347	Chr1	68808110	68808669	2
Chr1	68643561	68644251	Chr1	68772491	68773378	2
Chr1	68680893	68681600	Chr1	68694757	68695423	2
Chr1	68713823	68714353	Chr1	68741856	68742442	2
Chr1	68729272	68730102	Chr1	68742025	68742872	2
Chr1	68741580	68742799	Chr1	68766847	68767895	5
Chr1	68757973	68758705	Chr1	68772536	68773115	2
Chr1	68767203	68767880	Chr1	68793231	68793804	2
Chr1	68772492	68774240	Chr1	68792893	68793828	9
Chr1	68772878	68773704	Chr1	68808438	68808993	2
Chr1	68773495	68774373	Chr1	68788229	68789042	2
Chr1	68793304	68793955	Chr1	68808056	68808629	2
Chr1	68962193	68963191	Chr1	69010059	69010904	2
Chr1	68982055	68982794	Chr1	69010235	69011053	2
Chr1	69009841	69010800	Chr1	69554217	69554831	2
Chr1	69161778	69162325	Chr1	69553952	69554468	2
Chr1	69352839	69353515	Chr1	69396951	69397511	2
Chr1	69352915	69353697	Chr1	69485700	69486336	2
Chr1	69397156	69398066	Chr1	69468645	69469285	2
Chr1	69468144	69469283	Chr1	69553799	69554484	3
Chr1	69524670	69525580	Chr1	69553889	69554562	2
Chr1	69525664	69526339	Chr1	69553804	69554731	3
Chr1	69525913	69526538	Chr1	69784142	69785039	2
Chr1	69526381	69527222	Chr1	69575375	69576197	2
Chr1	69553740	69554859	Chr1	69575206	69576468	14
Chr1	69553874	69554597	Chr1	69611424	69612535	3
Chr1	69553917	69554893	Chr5	165234988	165235768	2
Chr1	69553935	69554495	Chr1	69677054	69678159	4
Chr1	69554054	69554740	Chr1	69588576	69589185	5
Chr1	69555466	69556685	Chr1	69575682	69576468	3
Chr1	69588379	69589207	Chr1	69676897	69677686	2
Chr1	69588499	69589089	Chr1	69708738	69709308	2
Chr1	70796273	70796991	Chr1	70818534	70819204	2
Chr1	70797385	70798380	Chr1	70812548	70813420	4
Chr1	71076192	71076792	Chr1	71472472	71473281	2
Chr1	71334077	71334594	Chr1	71356262	71356783	2
Chr1	71472665	71473446	Chr1	71486895	71487570	2
Chr1	71892539	71893098	Chr1	71926767	71927456	2
Chr1	71936169	71936700	Chr1	71944869	71945447	2
Chr1	72286591	72287491	Chr1	72351299	72352282	2
Chr1	72286609	72287444	Chr1	72297830	72298750	5
Chr1	72507709	72508710	Chr1	72516286	72516954	3
Chr1	72507845	72508563	Chr1	72523847	72524629	2
Chr1	72936992	72937564	Chr1	73045008	73045894	2
Chr1	72964062	72964755	Chr1	73324660	73325270	2
Chr1	73099318	73099963	Chr1	73324452	73325346	2
Chr1	73100679	73101692	Chr1	73324291	73325259	3
Chr1	73220331	73221045	Chr1	73324499	73325247	3
Chr1	73244157	73244730	Chr1	73324435	73325107	2
Chr1	73324183	73324916	Chr1	73389891	73390712	2
Chr1	73324343	73325076	Chr1	73354019	73354970	4
Chr1	73324398	73324971	Chr1	73669090	73669726	2
Chr1	73324504	73325151	Chr1	73691544	73692476	2
Chr1	73324557	73325199	Chr1	73613638	73614628	2
Chr1	73531064	73531742	Chr1	73572568	73573183	2
Chr1	73560968	73561716	Chr1	73572325	73572929	2
Chr1	73572422	73573183	Chr1	73586926	73587614	3
Chr1	73572512	73573218	Chr1	73613488	73614134	2
Chr1	74790028	74790662	Chr1	74804176	74805016	2
Chr1	74992017	74992800	Chr1	75118091	75119087	2
Chr1	75093606	75094472	Chr1	75117952	75118900	2
Chr1	75163323	75164077	Chr1	75196776	75197599	4
Chr1	75736206	75737038	Chr1	76199299	76199929	2
Chr1	75765432	75766326	Chr1	75888869	75889841	3
Chr1	75889032	75889833	Chr1	75915980	75916989	3
Chr1	75889033	75889973	Chr1	75958202	75958903	3
Chr1	75889088	75889904	Chr1	76198968	76199706	3
Chr1	75891315	75891910	Chr1	75958336	75958933	2
Chr1	75938445	75939128	Chr1	75958112	75958820	3
Chr1	75957770	75958928	Chr1	76024578	76025417	3
Chr1	75958071	75958614	Chr1	76054390	76054997	2
Chr1	75958081	75958664	Chr1	75967306	75967953	2
Chr1	75958103	75958920	Chr1	76211332	76211882	2
Chr1	76024453	76025172	Chr1	76039924	76040682	2
Chr1	76024520	76025200	Chr1	76054126	76054948	2
Chr1	76024791	76025405	Chr1	76094457	76095320	2
Chr1	76040044	76040778	Chr1	76054200	76055008	2
Chr1	76094299	76095177	Chr1	76199341	76199886	2
Chr1	76165967	76166467	Chr18	39958903	39959488	2
Chr1	76199034	76200425	Chr1	76210917	76211936	11
Chr1	76199043	76199641	Chr5	164311957	164312766	2
Chr1	76199453	76200178	Chr4	12862874	12863685	2
Chr1	76341613	76342574	Chr1	76481466	76482266	2
Chr1	76478530	76479393	Chr1	76487319	76488048	2
Chr1	76478558	76479432	Chr1	76534146	76535123	5
Chr1	76478585	76479124	Chr1	76525119	76525829	2
Chr1	76524907	76526043	Chr1	76534366	76535300	6
Chr1	76534121	76535030	Chr1	76552102	76552879	3
Chr1	76534335	76534898	Chr1	81963777	81964762	2
Chr1	76534340	76535262	Chr1	76548150	76549092	3
Chr1	76534432	76535402	Chr1	77592094	77592608	2
Chr1	76534472	76535338	Chr1	76544931	76545814	3
Chr1	76611577	76612135	Chr1	77592533	77593248	2
Chr1	76796530	76797286	Chr1	76832043	76832585	2
Chr1	76831465	76832833	Chr1	77321059	77322514	9
Chr1	76831894	76832754	Chr1	77508515	77509235	3
Chr1	76831934	76832853	Chr1	76935293	76935912	2
Chr1	76831939	76833388	Chr1	76872453	76873745	8
Chr1	76832030	76832844	Chr1	76943776	76944910	5
Chr1	76832243	76832798	Chr1	77808275	77809100	2
Chr1	76832262	76832841	Chr1	76953897	76954501	2
Chr1	76832308	76832896	ChrX	71044310	71045290	2
Chr1	76834155	76834706	Chr1	76943583	76944563	2
Chr1	76837244	76838053	Chr1	77321580	77322388	2
Chr1	76837352	76838023	Chr1	76943681	76944476	2
Chr1	76872811	76873520	Chr1	76943996	76944610	2
Chr1	76872954	76873648	Chr1	77508153	77508990	2
Chr1	76899574	76900371	Chr1	77592845	77593442	2
Chr1	76935091	76935839	Chr1	77321571	77322506	2
Chr1	76935119	76936110	Chr1	76943703	76944578	5
Chr1	76943576	76944544	Chr1	77508415	77509190	4
Chr1	76943669	76944295	Chr5	180690370	180690884	2
Chr1	76943673	76944570	Chr1	77321666	77322397	4
Chr1	76943735	76944566	Chr1	77008453	77009209	2
Chr1	76943765	76944563	Chr1	76954027	76954719	3
Chr1	76943775	76944543	Chr1	76995819	76996638	2
Chr1	76943834	76944529	Chr1	76960578	76961267	3
Chr1	77133732	77134428	Chr1	77321532	77322272	2
Chr1	77217938	77218879	Chr1	77592521	77593081	3
Chr1	77223425	77223986	Chr1	77321509	77322432	2
Chr1	77279718	77280576	Chr1	77321631	77322318	2
Chr1	77290353	77291159	Chr1	77321663	77322502	4
Chr1	77321426	77322838	Chr1	77332635	77333647	3
Chr1	77321529	77322694	Chr1	77537262	77538038	3
Chr1	77321570	77322154	Chr1	77508528	77509259	2
Chr1	77496438	77496973	Chr1	77508410	77509027	2
Chr1	77508326	77509286	Chr1	77537264	77538507	7
Chr1	77537575	77538298	Chr22	43581666	43582462	2
Chr1	77621942	77622542	Chr1	77808319	77809004	2
Chr1	77625652	77626305	Chr1	78004395	78004957	2
Chr1	77625790	77626321	Chr1	77727184	77727959	2
Chr1	77625873	77626615	Chr1	77974813	77975445	2
Chr1	77625971	77626566	Chr1	78139969	78140651	2
Chr1	77626091	77626632	Chr1	78029771	78030634	2
Chr1	77630751	77631426	Chr1	77974973	77975650	2
Chr1	77645061	77645589	Chr1	78004538	78005321	2
Chr1	77645087	77645689	Chr1	77999309	78000065	3
Chr1	77645208	77645970	Chr1	78030227	78030746	2
Chr1	77727142	77727902	Chr1	77758891	77759648	2
Chr1	77758761	77759335	Chr1	77808335	77808916	2
Chr1	77808263	77808963	Chr1	78207599	78208407	3
Chr1	77808283	77809072	Chr1	77974482	77975266	3
Chr1	77808358	77809165	Chr1	78262092	78262717	2
Chr1	77808435	77809190	Chr1	78029769	78030748	4
Chr1	77808569	77809076	Chr1	78139582	78140452	2
Chr1	77974590	77975477	Chr1	78139834	78140701	2
Chr1	77974841	77975707	Chr1	78004338	78005253	3
Chr1	77999323	78000254	Chr1	78029775	78030748	4
Chr1	78003900	78004910	Chr1	78029876	78030711	3
Chr1	78004369	78005255	Chr1	78021999	78022753	2
Chr1	78029821	78030832	Chr1	78139725	78140698	8
Chr1	78029858	78030502	Chr1	78261992	78262839	3
Chr1	78139980	78140827	Chr1	78261945	78262612	3
Chr1	78207591	78208404	Chr1	78222137	78223132	4
Chr1	78207610	78208437	Chr1	78261941	78262946	6
Chr1	78209466	78210133	Chr1	78262408	78263008	2
Chr1	78211121	78211802	Chr1	78222145	78222853	3
Chr1	78222406	78223570	Chr1	78262111	78262798	3
Chr1	78248479	78249165	Chr1	78354144	78354949	2
Chr1	78248719	78249532	Chr1	78262113	78263039	3
Chr1	78262110	78262884	Chr1	78557778	78558470	2
Chr1	78463675	78464478	Chr1	78840476	78841033	2
Chr1	78610504	78611367	Chr1	78840134	78840666	2
Chr1	78611438	78612648	Chr1	78687651	78688734	4
Chr1	78611800	78612487	Chr1	78746225	78747086	4
Chr1	78611811	78612600	Chr1	78811435	78812094	4
Chr1	78611824	78612407	Chr1	78839010	78839999	2
Chr1	78611842	78612358	Chr1	78840280	78841147	2
Chr1	78611890	78612788	Chr1	79014799	79015717	2
Chr1	78612102	78612693	Chr1	78689497	78690419	2
Chr1	78688034	78688984	Chr1	78832502	78833315	2
Chr1	78688843	78689416	Chr1	78771130	78772123	2
Chr1	78697448	78698292	Chr1	79015285	79015951	2
Chr1	78746147	78746801	Chr1	78840037	78841027	3
Chr1	78746383	78747038	Chr1	79014832	79015405	2
Chr1	78746421	78747055	Chr1	78832468	78833189	2
Chr1	78816771	78817444	Chr1	78840000	78841071	3
Chr1	78832704	78833610	Chr1	79484072	79484851	2
Chr1	78838842	78839994	Chr1	79014982	79015631	3
Chr1	78839796	78840695	Chr1	79056870	79057453	2
Chr1	78840119	78840886	Chr1	78966531	78967470	2
Chr1	78840131	78840944	Chr1	78853143	78853962	2
Chr1	78840144	78840743	Chr1	78890391	78890974	2
Chr1	78840419	78840948	Chr1	78991833	78992716	2
Chr1	78844682	78845436	Chr1	85433584	85434221	2
Chr1	78908770	78909369	Chr1	79015074	79015759	2
Chr1	78966769	78967690	Chr1	79063294	79063984	2
Chr1	78969840	78970543	Chr1	78991888	78992563	2
Chr1	79056679	79057472	Chr1	79066873	79067581	2
[truncated: 68,135 more rows]
