# Supplementary material for: An AR-ERG transcriptional signature defined by long-range chromatin interactomes in prostate cancer cells
Source: HighWire-hosted journal article supplement (doi:10.1101/gr.230243.117), 2019-01-03
Supplement: Supplemental_Table_S2.xlsx [file Supplemental_Table_S2.xlsx]

## Sheet: Sheet1
Table.S2: Library Statistics of AR ChIA-PET
AR ChIA-PET	Count	Percentage
Inter-chromosome PETs	9090481	0.5622
Intra-chromosome PETs	2015207	0.1246
Self-ligation PETs	4403725	0.2723
Different orientation PETs	660573	0.0409
Total PETS	16169986	1
