# Supplementary material for: An AR-ERG transcriptional signature defined by long-range chromatin interactomes in prostate cancer cells
Source: HighWire-hosted journal article supplement (doi:10.1101/gr.230243.117), 2019-01-03
Supplement: Supplemental_Table_S3.xlsx [file Supplemental_Table_S3.xlsx]

## Sheet: Sheet1
Table.S3: Statistics of Overlapping AR ChIA-PET long range interactions with Structure Variation in VCaP cell line
AR PET2+ Loopings	Count	Percentage
SV overlap	4409	0.0591479
non-SV Looping	70133	0.940852
Total	74542	1
