# Supplementary material for: An AR-ERG transcriptional signature defined by long-range chromatin interactomes in prostate cancer cells
Source: HighWire-hosted journal article supplement (doi:10.1101/gr.230243.117), 2019-01-03
Supplement: Supplemental_Table_S4.xlsx [file Supplemental_Table_S4.xlsx]

## Sheet: SV
Table.S4: The structure variations in VCaP cell line. Each row represents one structure variation. Columns 1-3 are the genomic coordinates of 1st break point of a given variation; Columns 4-6 are the genomic coordinates of 2nd break point of a given variation
breakpoint1_chrom	breakpoint1_start	breakpoint1_end	breakpoint2_chrom	breakpoint2_start	breakpoint2_end
chr3	33133984	33142119	chr3	33147817	33156304
chr3	147762921	147771068	chr3	147774807	147782734
chr3	172266851	172273662	chr3	172278053	172284898
chr4	102435684	102442978	chr4	102490750	102497630
chr4	167099912	167108784	chr4	167114184	167122195
chr4	176423841	176432745	chr4	179198339	179206944
chr5	4040014	4048943	chr5	4055312	4064132
chr5	25812564	25821595	chr5	25824059	25833289
chr5	52768362	52775467	chr5	143473570	143480318
chr5	66938194	66944752	chr5	143463619	143470498
chr5	56131510	56136572	chr5	119083556	119088861
chr5	114133616	114136028	chr5	119080525	119083112
chr5	54899861	54908058	chr5	54911278	54919831
chr5	58328863	58337677	chr5	148138232	148146823
chr5	74541177	74542047	chr5	94351201	94352797
chr5	86608484	86610214	chr5	165436047	165436866
chr5	86942212	86945006	chr5	158969323	158972093
chr5	89410676	89413451	chr5	94345620	94348708
chr5	102311463	102313460	chr5	158930447	158931847
chr5	102336723	102341569	chr5	119676176	119681602
chr5	102655055	102662800	chr5	158616317	158624686
chr5	102671945	102674237	chr5	158969005	158972037
chr5	109063266	109066726	chr5	178763252	178766827
chr5	115206544	115207890	chr5	166303576	166304309
chr5	119676812	119678630	chr5	177002631	177003734
chr5	143395185	143396899	chr5	175286858	175288777
chr5	154607030	154609480	chr5	169478838	169481745
chr5	158621204	158628946	chr5	165421324	165427641
chr5	60348423	60356491	chr5	66071579	66081303
chr5	61568035	61571955	chr5	61579162	61582853
chr5	62816434	62818238	chr5	168046299	168047149
chr5	79259134	79261930	chr5	158155753	158157431
chr5	79260438	79265976	chr5	145581879	145582492
chr5	66252438	66261323	chr5	100965090	100973661
chr5	143996504	143997869	chr5	170577401	170578507
chr5	67351572	67356314	chr5	125003150	125008745
chr5	96965291	96969643	chr5	114867850	114870920
chr5	114867790	114871144	chr5	158294866	158298817
chr5	122915909	122924109	chr5	180628270	180635659
chr5	161025300	161032887	chr5	173376320	173384588
chr5	174258497	174266521	chr5	176657902	176665814
chr5	75986099	75989368	chr5	158065671	158069018
chr5	75989695	75992740	chr5	178591764	178594489
chr5	158064329	158068909	chr5	178594434	178599243
chr5	76529681	76538052	chr5	180130891	180138386
chr5	78677946	78682335	chr5	142434081	142437583
chr5	90805743	90814959	chr5	92186307	92194381
chr5	91199567	91208631	chr5	142070290	142079058
chr5	91211017	91212554	chr5	98206524	98211329
chr5	166261364	166265097	chr5	180063153	180067628
chr5	144898076	144900756	chr5	157862490	157864377
chr5	98157247	98161024	chr5	146022620	146025395
chr5	97873149	97882037	chr5	136023122	136030754
chr5	98470842	98478490	chr5	122057192	122064569
chr5	102459135	102467763	chr5	164578114	164587609
chr5	107646080	107647225	chr5	158178852	158180127
chr5	112006137	112014387	chr5	117466651	117474755
chr5	113911737	113919716	chr5	159966461	159974527
chr5	146782615	146789509	chr5	173664542	173671550
chr5	158746011	158754269	chr5	170977274	170986121
chr5	163703383	163711921	chr5	163714812	163723068
chr6	11065062	11069355	chr6	20647788	20651713
chr6	24202001	24208543	chr6	24360705	24366664
chr6	11470901	11480053	chr6	19835905	19844800
chr6	21137701	21146545	chr6	21432703	21440599
chr1	150737187	150746313	chr1	150748115	150757578
chr6	33205486	33211729	chr6	33627938	33634575
chr6	101948720	101959039	chr6	101959825	101969962
chr1	154522900	154530547	chr1	154791298	154799160
chr6	135416579	135425051	chr6	135846369	135854595
chr9	116285627	116294188	chr9	125684737	125693183
chr7	1069914	1076307	chr7	1082480	1087957
chr7	1069914	1076307	chr7	1082480	1087957
chr8	25845202	25854027	chr8	26362063	26370490
chr8	35599802	35602014	chr8	35613100	35614191
chr8	35601600	35614321	chr8	35635913	35644310
chr8	41648247	41649491	chr8	43004443	43006706
chr8	41544641	41552307	chr8	41558264	41566129
chr1	193343714	193352586	chr1	193580829	193588645
chr8	128915578	128924201	chr8	137183223	137191924
chr8	129167113	129174237	chr8	137039388	137049429
chr8	122452682	122460506	chr8	137349426	137358155
chr8	138116326	138119660	chr8	138128377	138130672
chr9	94756612	94763718	chr9	95161511	95170822
chr9	106558932	106566729	chr9	106570169	106577756
chr10	36910263	36920558	chr10	36932417	36947878
chr2	89850980	89859424	chr2	89862670	89871786
chr11	12509550	12517771	chr11	12523683	12531725
chr11	104746281	104755156	chr11	104762643	104772037
chr12	19195414	19203411	chr12	19206634	19214683
chr12	62407619	62417103	chr12	62418522	62428842
chr12	114983132	114991362	chr12	116103543	116111607
chr12	122474346	122482980	chr12	122485784	122493975
chr13	68055098	68063911	chr13	70013462	70021920
chr13	70017873	70026803	chr13	74620825	74629575
chr13	99227899	99235544	chr13	99240886	99248758
chr13	101298251	101306605	chr13	101309544	101322474
chr14	28313771	28320182	chr14	28376717	28383783
chr14	47699201	47707241	chr14	47718020	47726326
chr15	45216492	45221532	chr15	45230287	45235075
chr15	82557868	82563516	chr15	82569057	82574485
chr16	34917564	34925214	chr16	34928633	34936732
chr2	9699379	9705536	chr2	10887842	10894130
chr19	2896915	2904907	chr19	11469348	11477184
chr20	360527	367016	chr20	381160	387770
chr20	62759282	62763147	chr20	62770470	62774242
chr22	23253558	23261041	chr22	23265162	23272658
chrX	55548544	55553342	chrX	67346789	67356662
chrX	67343403	67349302	chrX	67354362	67362980
chrX	94001341	94009613	chrX	125490261	125498894
chr1	9752342	9754587	chr1	12174239	12177032
chr1	191693875	191707018	chr1	191707422	191717871
chr1	28542943	28551097	chr1	28554371	28562289
chr1	28542943	28551097	chr1	28554371	28562289
chr2	38435228	38442370	chr2	75064291	75072335
chr2	47670996	47677197	chr2	47985403	47991610
chr2	38584592	38591713	chr2	38598604	38606219
chr3	168702405	168710387	chr3	168713385	168721301
chr3	175148007	175159377	chr3	175228112	175235715
chr2	70467012	70472632	chr2	236658389	236664624
chr4	92280657	92288086	chr4	92426412	92434186
chr10	86108784	86113120	chr10	96582838	96587431
chr10	86222181	86231155	chr10	96195629	96203654
chr10	90929491	90937365	chr10	103195059	103202517
chr4	142084918	142091381	chr4	142097967	142104587
chr4	158719530	158728355	chr4	158731989	158740546
chr4	164563283	164571230	chr4	165295036	165303708
chr4	181032199	181041127	chr4	181043933	181052349
chr5	8246077	8255729	chr5	8261525	8268687
chr5	123126599	123134595	chr5	123141279	123149379
chr5	128289617	128292289	chr5	128309175	128311725
chr5	163656992	163662720	chr5	163667714	163673554
chr6	95280867	95289166	chr6	95291970	95300125
chr2	105654018	105664195	chr2	105666049	105678725
chr7	158213142	158216557	chr7	158225189	158227608
chr8	24032687	24042379	chr8	24045076	24056075
chr8	43594609	43603868	chr8	43625543	43633601
chr8	117135190	117151480	chr8	117165491	117181268
chr9	100659847	100666901	chr9	100670890	100678645
chr10	3194911	3202574	chr10	3205878	3213537
chr10	68845377	68854152	chr10	68856571	68865883
chr11	26597214	26606171	chr11	26608438	26620208
chr11	134355853	134361310	chr11	134368162	134372519
chr12	16330948	16339776	chr12	16392473	16403843
chr13	41785354	41792821	chr13	47754258	47762083
chr13	68130829	68137444	chr13	75984707	75992109
chr13	114273012	114280797	chr13	114295056	114304010
chr14	50708827	50717519	chr14	50720268	50734523
chr17	7185696	7191325	chr17	42759185	42765952
chr17	59110289	59118516	chr17	59129137	59136878
chr17	78686220	78694507	chr17	78698434	78707898
chr18	76654891	76661794	chr18	76666767	76673852
chr20	7596871	7606665	chr20	7607610	7617349
chr20	36163041	36174612	chr20	36179480	36187625
chr21	22715019	22723843	chr21	22755234	22763894
chrY	15710326	15716511	chrY	15732476	15738584
chr2	209072618	209079961	chr2	209087141	209094592
chr3	20404761	20413241	chr3	20416718	20425432
chr4	55323267	55330610	chr7	14254546	14262135
chr4	63172139	63178957	chr6	34693752	34699718
chr4	94299654	94307869	chr7	47908148	47918577
chr4	94308204	94317075	chr7	47918773	47927197
chr4	187481663	187489086	chr14	60995042	61001224
chr5	52514880	52521457	chr6	44959191	44966131
chr5	145892197	145896403	chr6	30098644	30102180
chr5	145887476	145892213	chr6	30110756	30114071
chr5	145896983	145904261	chr6	30099156	30110301
chr5	147801582	147802476	chr6	30098018	30099409
chr6	1405939	1413581	chr11	68043618	68050691
chr6	27632659	27641877	chr11	68034624	68043033
chr6	11070954	11073974	chr17	47643143	47645787
chr6	24350460	24358426	chr9	111544829	111552116
chr9	112085274	112090092	chr17	47649073	47654024
chr6	19999146	20007568	chr11	57726653	57735466
chr6	20178439	20186543	chr9	109336845	109345650
chr6	20554971	20558412	chr9	109452054	109454717
chr6	20551440	20555297	chr9	109446453	109450627
chr6	24162372	24170206	chr9	109397831	109406065
chr6	27581051	27589499	chr17	53923165	53931573
chr7	596170	604400	chr9	116043634	116051993
chr7	726058	729154	chr9	121216049	121219126
chr7	656405	664620	chr9	125670430	125678658
chr7	712964	720545	chr9	121312253	121320056
chr7	695639	703540	chr9	116299352	116306728
chr7	724611	728667	chr9	115816338	115821394
chr7	7066105	7071038	chr9	121219585	121224548
chr7	13928813	13937111	chr9	125978265	125986879
chr7	39282503	39289176	chr9	114910898	114917754
chr7	46133624	46139663	chr8	101150087	101157320
chr8	25855851	25863447	chr12	94686775	94695311
chr8	25891639	25899883	chr12	19734760	19742277
chr10	116004971	116012711	chr14	61864077	61871725
chr11	46123117	46130380	chr17	8263808	8271315
chr11	46897697	46905819	chr17	37466604	37475189
chr11	47886128	47887396	chr17	37427076	37429017
chr11	47901704	47909095	chr17	36824939	36833188
chr11	47913537	47916566	chr17	39857089	39864233
chr11	47172638	47178740	chr17	39865198	39871040
chr11	47890346	47894063	chr17	39871234	39874882
chr13	96915407	96921381	chr17	39865388	39871180
chr12	123447142	123453583	chr16	85020381	85025507
chr12	123454222	123456559	chr16	84743930	84745757
chr12	123456526	123464506	chr21	40538569	40546979
chr16	85026483	85034273	chr17	73781329	73788655
chr17	73788426	73796113	chr21	40548148	40556596
chr13	95809534	95817248	chr17	40883522	40892038
chr13	96607461	96615881	chr17	4516563	4525397
chr13	97212652	97221422	chr17	37071567	37079222
chr13	112675412	112682148	chr17	26998799	27005300
chr15	58572533	58581005	chr22	46509058	46517167
chr15	60634295	60641685	chr22	46347266	46354945
chr15	72864109	72871544	chr22	22081814	22089768
chr16	67708067	67716562	chr21	39876414	39884526
chr16	67146979	67153988	chr21	42847675	42853682
chr18	1928860	1936067	chrX	65000040	65007479
chr1	86035543	86043442	chr15	77331744	77339744
chr4	97989755	97997372	chr10	86275939	86284967
chr4	97999394	98006869	chr6	87527310	87535331
chr6	159752731	159760579	chr10	95380567	95387153
chr6	159820496	159827338	chr10	86265628	86277120
chr6	159836750	159841780	chr10	95422682	95427779
chr6	159837973	159839524	chr10	86234525	86235602
chr6	159840646	159844317	chr10	86153219	86155169
chr6	159758771	159760435	chr10	96172807	96173455
chr6	159770339	159774112	chr10	86145055	86148073
chr6	160113256	160121066	chr10	96444997	96453131
chr6	158300500	158307398	chr10	90929654	90936406
chr6	159754995	159756715	chr10	96453689	96454605
chr6	159756327	159759505	chr10	103191184	103194158
chr6	159775362	159776787	chr10	96184115	96185165
chr6	159831771	159836999	chr10	96189357	96193768
chr6	42168524	42173659	chr16	72099534	72107036
chr6	42176127	42182113	chr16	72109958	72116506
chr7	7932479	7939415	chr14	38022492	38034393
chr7	7940838	7949048	chr14	38042680	38051070
chr7	14189043	14197825	chr14	37977085	37985462
chr7	14198607	14210203	chr14	37993464	38001378
chr1	8776662	8783337	chr8	145512995	145519140
chr2	9924866	9931351	chr14	74383220	74389412
chr2	25252400	25253950	chr15	59177681	59179632
chr2	25252459	25254020	chr14	74397038	74399782
chr2	9924360	9931107	chr15	59187693	59194755
chr14	74391148	74396890	chr15	59179361	59185402
chr2	69751350	69760339	chr3	5721452	5730150
chr2	64698814	64706599	chr3	122541224	122549626
chr2	64707319	64715162	chr3	5712811	5720521
chr2	70475289	70482359	chr3	122549687	122562100
chr2	86684674	86700115	chr11	70172605	70184467
chr2	205734480	205743273	chr3	122143742	122152157
chr2	97474039	97481448	chr3	122135412	122142924
chr5	78282243	78284182	chr5	113796384	113797749
chr5	86941741	86945183	chr5	164025556	164029096
chr5	87504896	87507006	chr5	92681745	92683433
chr5	87507705	87511674	chr5	172906782	172910617
chr5	102338463	102339994	chr5	170180424	170181013
chr5	102338693	102341582	chr5	167866132	167867412
chr5	111085308	111088813	chr5	154605374	154609129
chr5	114597537	114605895	chr5	172913370	172922412
chr5	115201842	115205915	chr5	123684041	123688049
chr5	115205391	115208071	chr5	176780295	176782716
chr5	119681768	119682657	chr5	177002594	177003720
chr5	120810038	120814681	chr5	166105599	166109684
chr5	143384529	143392923	chr5	158776336	158784863
chr5	169632376	169637469	chr5	180248251	180253242
chr5	174677423	174677932	chr5	180275580	180276453
chr5	62817789	62825375	chr5	124371583	124378989
chr5	124370774	124372083	chr5	168046290	168046856
chr5	63675828	63680950	chr5	113498481	113503427
chr1	154424852	154429369	chr1	154428661	154432902
chr5	126203466	126211639	chr5	128035834	128044718
chr5	64440632	64449583	chr5	126187691	126196341
chr5	64606144	64607270	chr5	98658085	98658877
chr5	66050441	66052784	chr5	121148565	121151055
chr5	79261528	79264745	chr5	113808281	113811088
chr5	79266117	79268279	chr5	158820219	158823151
chr5	121150901	121156090	chr5	125245553	125250217
chr5	121155865	121157301	chr5	130185385	130187262
chr5	121157921	121166326	chr5	157973397	157982357
chr1	154546684	154552343	chr1	154552577	154558008
chr5	145581908	145582584	chr5	158814042	158816027
chr5	158155790	158157439	chr5	158818650	158820469
chr5	102294627	102300147	chr5	121157977	121163746
chr5	120591503	120593616	chr5	125245724	125248124
chr5	120593649	120599674	chr5	130181724	130187299
chr5	67015587	67016855	chr5	170572291	170573454
chr5	78999936	79003987	chr5	158587295	158591173
chr5	90862914	90865303	chr5	170573799	170576437
chr1	154728837	154736660	chr1	154736363	154744491
chr5	67103558	67108832	chr5	86368883	86374875
chr5	86376068	86377465	chr5	112852515	112853214
chr5	81714942	81718957	chr5	180306133	180310148
chr5	96963156	96966161	chr5	159783880	159785804
chr5	106897581	106905782	chr5	161041275	161049093
chr5	138347194	138352762	chr5	158283193	158288827
chr5	148379778	148380406	chr5	174264730	174266136
chr5	153006915	153011195	chr5	172846134	172850706
chr1	154987499	154992644	chr1	154992443	154996812
chr5	153010111	153015181	chr5	180634713	180639427
chr5	156192628	156194693	chr5	174260930	174265794
chr5	174267529	174271182	chr5	180634961	180638498
chr5	81714347	81718431	chr5	173375211	173379207
chr5	96964849	96966967	chr5	161040313	161042584
chr5	98300639	98301895	chr5	125009803	125010998
chr5	107316699	107324386	chr5	126479042	126486545
chr5	158292619	158294998	chr5	159783634	159785751
chr5	72732829	72739227	chr5	170714923	170721411
chr5	72733065	72740363	chr5	169266868	169274368
chr5	73761891	73770396	chr5	98320958	98329798
chr5	75823050	75830008	chr5	174146938	174155144
chr5	140634140	140635446	chr5	174153681	174155497
chr5	107194617	107202253	chr5	140621828	140630242
chr5	75989296	75990551	chr5	135087856	135088726
chr5	75986071	75992988	chr5	169227602	169235447
chr5	109995273	110003905	chr5	158059796	158068398
chr5	136492244	136499358	chr5	180132025	180139480
chr5	78328735	78337847	chr5	78574810	78583203
chr5	78684294	78685528	chr5	170902785	170903537
chr5	106085332	106088407	chr5	133033978	133038800
chr5	78674258	78679590	chr5	179793259	179799046
chr5	78679754	78680342	chr5	168771933	168772565
chr5	80501488	80505099	chr5	167121679	167125602
chr5	90252770	90253779	chr5	147670073	147670874
chr5	102689960	102694730	chr5	158526699	158531107
chr5	91200199	91203314	chr5	154407157	154409969
chr5	102241251	102248924	chr5	164889427	164896346
chr5	112343548	112351956	chr5	154425607	154433575
chr5	144898147	144900441	chr5	169510056	169512828
chr5	92698015	92699420	chr5	119837888	119839340
chr5	92701088	92704913	chr5	111446331	111450538
chr5	94257225	94262778	chr5	167175374	167180883
chr5	152377403	152379626	chr5	167179801	167183064
chr5	96657585	96664702	chr5	143903950	143911416
chr5	142306669	142312678	chr5	164103916	164109861
chr5	96681365	96687614	chr5	164104035	164109845
chr5	107647210	107650581	chr5	158502418	158506144
chr5	121674893	121685160	chr5	180484073	180491960
chr5	158176006	158180078	chr5	158496972	158501764
chr5	107645825	107651027	chr5	121674240	121679499
chr5	121671275	121674760	chr5	158175463	158178712
chr5	152666187	152670119	chr5	180479213	180483206
chr5	157049399	157054509	chr5	180465123	180469593
chr2	70457829	70465705	chr2	236342360	236351158
chr5	157056135	157057317	chr5	172520979	172522094
chr5	107285567	107292769	chr5	107338124	107345315
chr5	112543577	112549012	chr5	136393203	136398629
chr5	136398382	136405534	chr5	179306370	179313765
chr5	142787639	142791983	chr5	175115657	175119528
chr5	142790969	142796506	chr5	152524568	152528923
chr5	144722460	144731338	chr5	158224454	158232557
chr5	144760850	144769777	chr5	165845198	165854008
chr5	144925572	144928443	chr5	159546954	159548721
chr6	30094022	30098371	chr6	30110683	30113866
chr2	69760553	69769452	chr2	236351854	236360234
chr5	165470096	165477953	chr5	165540751	165548388
chr5	150389826	150397927	chr5	165457218	165465138
chr5	154917940	154926102	chr5	154930906	154938803
chr5	154910531	154918695	chr5	154928726	154937014
chr5	156061815	156069883	chr5	173991673	173999059
chr5	158122040	158130275	chr5	160336372	160344893
chrX	67068206	67073149	chrX	67072330	67078778
chrX	66948997	66954673	chrX	66954590	66961054
chr5	172602978	172606012	chr5	175933355	175937014
chr5	172606966	172610806	chr5	175257912	175261503
chr2	205743248	205744186	chr2	205751455	205753560
chr5	177619433	177627366	chr5	180095482	180103503
chr6	10968491	10973323	chr6	10973189	10978137
chr6	11075198	11083123	chr6	24338445	24346077
chr6	20264101	20272832	chr6	20495600	20504532
chr6	20295145	20300037	chr6	20300134	20304759
chr2	99194544	99202497	chr2	234740371	234748022
chr6	20551526	20553336	chr6	20553791	20555464
chr6	20805690	20811385	chr6	20810996	20816871
chr6	27717048	27721850	chr6	27721824	27726833
chr6	33148303	33152529	chr6	33153489	33158235
chr6	43213466	43219600	chr6	43220646	43226289
chr6	49515482	49519795	chr6	49519865	49524497
chr6	50075609	50080918	chr6	50080924	50085717
chr2	233411607	233418134	chr2	234748681	234754689
chr9	116300288	116306854	chr9	125621390	125628485
chr7	6514483	6522374	chr7	6535557	6543649
chr7	6523927	6530117	chr7	6543545	6549809
chr8	35625864	35631645	chr8	41640987	41647532
chr8	35592971	35602158	chr8	41627167	41636260
chr8	35625948	35631795	chr8	43006691	43012159
chr8	38169929	38174673	chr8	38174520	38179227
chr8	38156032	38165063	chr8	38187971	38196806
chr8	38898711	38904978	chr8	38905143	38910934
chr8	39017346	39022805	chr8	39022407	39027653
chr8	128899180	128908008	chr8	129152535	129161349
chr8	121122272	121128772	chr8	121128588	121134837
chr8	121984090	121993039	chr8	137840136	137849289
chr8	122489515	122497654	chr8	138007223	138016251
chr3	43682772	43691241	chr3	57832649	57840462
chr8	122911813	122920496	chr8	137389321	137397614
chr9	109192388	109201489	chr9	109216320	109224817
chr3	43694075	43699766	chr3	57841136	57848815
chr11	12531882	12539368	chr11	17003702	17011328
chr11	12872123	12880501	chr11	17217126	17225214
chr17	37448374	37457191	chr17	37532958	37541606
chr11	47885894	47887253	chr11	47895123	47896312
chr11	47909499	47913593	chr11	47921228	47926095
chr17	37422795	37426921	chr17	39871222	39875074
chr11	62835717	62840171	chr11	63075231	63080059
chr11	63113906	63119244	chr11	63118699	63123854
chr11	64171720	64179517	chr11	64256505	64264146
chr11	64215451	64218984	chr11	64218901	64222922
chr12	20459972	20468641	chr12	106664619	106674441
chr3	130057387	130065172	chr3	130114027	130121236
chr12	91611862	91621110	chr12	105295561	105303770
chr16	84738397	84743332	chr16	85020281	85025515
chr13	78274392	78281553	chr13	86604731	86612571
chr13	78285351	78292760	chr13	86644440	86652128
chr3	130066146	130075234	chr3	130123022	130131612
chr13	108569743	108571356	chr13	108571189	108572932
chr13	109673342	109677741	chr13	109677251	109682725
chr13	112741371	112743336	chr13	112743312	112744072
chr16	67137007	67144720	chr16	67699583	67707153
chr21	39867283	39876341	chr21	42854002	42864455
chr21	42854082	42864379	chr21	42871997	42880916
chr19	24141797	24146187	chr19	24146358	24151180
chrX	54530035	54533890	chrX	54536277	54540436
chrX	55549557	55552132	chrX	67356707	67359280
chrX	66028104	66033211	chrX	66032612	66038143
chrX	66267022	66272006	chrX	66271344	66275864
chrX	66528951	66538255	chrX	66535141	66549549
chrX	66695466	66702749	chrX	66702210	66709497
chrX	66805547	66809151	chrX	66809167	66812847
chr1	8422132	8427588	chr1	11420910	11426370
chr1	11433967	11438258	chr1	26950179	26954430
chr1	8464621	8471156	chr1	9758074	9764303
chr3	173995816	174003851	chr3	174028907	174036074
chr3	175104453	175112948	chr3	175183064	175190805
chr3	175202349	175210745	chr3	175248836	175256952
chr4	96304248	96312415	chr4	97989938	97998292
chr10	90922757	90927953	chr10	96575655	96580482
chr10	96188853	96193791	chr10	101248399	101253448
chr10	90862068	90865843	chr10	90973405	90978998
chr10	90977919	90980125	chr10	95424397	95425325
chr4	30105928	30106770	chr4	32737122	32738420
chr12	47282138	47289970	chr12	47302022	47309663
chr12	47290526	47300748	chr12	47310056	47318811
chr13	30374796	30380055	chr13	78002386	78007603
chr4	29736997	29745213	chr4	32743528	32751187
chr17	7240846	7245459	chr17	42823771	42830673
chr4	44866584	44874866	chr4	45936131	45943841
chr4	43531754	43534119	chr4	44878782	44881436
chr4	64723130	64732085	chr4	73081741	73090881
chr4	73031572	73036586	chr4	73091896	73096335
chr4	74874768	74879028	chr4	74879223	74883151
chr4	81045851	81053872	chr4	189660721	189668514
chr4	189642322	189650065	chr4	189669290	189676732
chr4	163093800	163104877	chr4	172328878	172336900
chr4	163699250	163707490	chr4	173811128	173819030
chr4	187216374	187224404	chr4	187571551	187580077
chr5	4035914	4039550	chr5	4040238	4043389
chr5	99654553	99660735	chr5	126809483	126816379
chr5	116253734	116261276	chr5	140554709	140560156
chr5	126808257	126810019	chr5	146981840	146983332
chr5	143485898	143494400	chr5	157159606	157168129
chr5	113306080	113312666	chr5	119072883	119079377
chr5	52874865	52883146	chr5	56136999	56145432
chr5	107953338	107962216	chr5	113317153	113325896
chr5	54810433	54819624	chr5	155110156	155117665
chr5	58467549	58477462	chr5	173409475	173416995
chr5	60400924	60403266	chr5	158969690	158971793
chr5	64875111	64877619	chr5	119680213	119682641
chr5	74515944	74522961	chr5	110146552	110153678
chr5	74525741	74529383	chr5	109058566	109062798
chr5	81089281	81091864	chr5	169301023	169304839
chr5	81093552	81095332	chr5	115203974	115206533
chr5	86612360	86616850	chr5	169305327	169310113
chr5	92681847	92683397	chr5	180248905	180251357
chr5	96733777	96736185	chr5	158971647	158977642
chr5	102882493	102884296	chr5	143397520	143399542
chr5	111339392	111340810	chr5	143400115	143404211
chr5	115202128	115208080	chr5	143391276	143397495
chr5	117629148	117638027	chr5	169486256	169494587
chr5	117633163	117636671	chr5	178763733	178767046
chr5	119676028	119679754	chr5	176326711	176331121
chr5	143390469	143395142	chr5	166105634	166109731
chr5	164025563	164027206	chr5	170177951	170180989
chr5	165435845	165436901	chr5	169303797	169306069
chr5	172908268	172910500	chr5	180251134	180253905
chr5	61937091	61937595	chr5	86942090	86945575
chr5	62453897	62458022	chr5	119675965	119679890
chr5	64872998	64873852	chr5	86605508	86606443
chr5	64873409	64877755	chr5	129195311	129199621
chr3	132068356	132076578	chr3	131865478	131873603
chr8	128196659	128204503	chr8	127980591	127990933
chr8	129430139	129436155	chr8	128098764	128105820
chr9	10320018	10329065	chr9	10312864	10322099
chr11	69478170	69484784	chr11	68308881	68315130
chr21	42857736	42859717	chr21	42855112	42857688
chr4	30109113	30114307	chr4	30100674	30106003
chr1	13854456	13856369	chr1	13783977	13785975
chr2	189276489	189282007	chr2	189123641	189129378
chr10	95422435	95428106	chr10	86155836	86163060
chr10	101246044	101247897	chr10	95387822	95389954
chr10	103191284	103193383	chr10	86145061	86147037
chr5	58343391	58351894	chr5	57147447	57155901
chr5	128334164	128341180	chr5	128297006	128303183
chr6	76639004	76646451	chr6	76423140	76430452
chr10	54998802	55006421	chr10	54528665	54536296
chr14	30497681	30505921	chr14	30297371	30305851
chr14	45561098	45568492	chr14	44919255	44926732
chr17	49557491	49564338	chr17	49494358	49500812
chr20	15517270	15525693	chr20	15485485	15493408
chr21	23444952	23452308	chr21	22696391	22703247
chr21	45239184	45246828	chr21	45212759	45219002
chrX	147356175	147363255	chrX	146742470	146749369
chr4	109221710	109230279	chr4	108547836	108556688
chr4	163118476	163126858	chr4	161717163	161725794
chr4	168842019	168845536	chr4	168771534	168775699
chr5	27003098	27010818	chr5	25942714	25950605
chr5	143465162	143473140	chr5	116261515	116270609
chr5	162385005	162385716	chr5	143470693	143472113
chr5	165578853	165579940	chr5	126818689	126822080
chr5	114127231	114131868	chr5	56131309	56135428
chr5	93057913	93066118	chr5	58639998	58649047
chr5	86609399	86612688	chr5	81089386	81091891
chr5	102315507	102317657	chr5	96733887	96736498
chr5	117638492	117641197	chr5	74526373	74528851
chr5	129191726	129199654	chr5	86605966	86614791
chr5	164026626	164029076	chr5	102336861	102339012
chr5	166373434	166377734	chr5	62457769	62462760
chr5	169645362	169654336	chr5	111085054	111092760
chr2	236648922	236655197	chr2	70466848	70472572
chr5	169654202	169654757	chr5	102339352	102340132
chr5	170266540	170267447	chr5	89410681	89412304
chr5	175286862	175289135	chr5	120814389	120817533
chr5	176330785	176334767	chr5	166373598	166377457
chr5	177002659	177004113	chr5	129192533	129194444
chr5	178391663	178393096	chr5	78284628	78285893
chr5	120592181	120601463	chr5	79243310	79253116
chr5	158815436	158819144	chr5	113808263	113811079
chr5	158594180	158602341	chr5	101966812	101975534
chr5	112852523	112854443	chr5	67109568	67111593
chr5	126486350	126494824	chr5	106880118	106888290
chr5	138329220	138338056	chr5	67356180	67365205
chr5	180632694	180635509	chr5	156192593	156194770
chr2	233397650	233402382	chr2	99212757	99216709
chr5	179977007	179984807	chr5	76140102	76147820
chr5	172053353	172061158	chr5	78311623	78320389
chr5	82912417	82913087	chr5	78680412	78681848
chr5	142433930	142437878	chr5	133033768	133038123
chr5	102689703	102694745	chr5	90247890	90253136
chr5	98218806	98227715	chr5	98201848	98210827
chr5	154417379	154425098	chr5	114078442	114086841
chr5	164898872	164900950	chr5	91210980	91212470
chr5	164901324	164907581	chr5	98200779	98206285
chr5	169516720	169522131	chr5	159504417	159509142
chr5	169519846	169524998	chr5	169516635	169521219
chr5	155444169	155445259	chr5	111446856	111449147
chr5	161983121	161984497	chr5	111449482	111450494
chr5	161985698	161987107	chr5	119837798	119838910
chr5	152376767	152379632	chr5	94262658	94265684
chr5	167175328	167183059	chr5	113546615	113554667
chr5	151493648	151502093	chr5	94764762	94772961
chr5	98160819	98165644	chr5	97853121	97858340
chr5	146022120	146024724	chr5	97857490	97861021
chr5	107754623	107763559	chr5	105936119	105944397
chr5	157485987	157493660	chr5	127601349	127609780
chr5	147801537	147802744	chr5	145904102	145905204
chr3	117614887	117623517	chr3	117040549	117049502
chr8	90966944	90975624	chr8	90940604	90949428
chr8	128243924	128251755	chr8	127924539	127931886
chr8	137172355	137180818	chr8	120743978	120752284
chr8	139620036	139627086	chr8	121924129	121930974
chr8	137299701	137307818	chr8	122452804	122460644
chr8	131025608	131033605	chr8	127648860	127655977
chr1	1002640	1002641	chr2	33141413	33141414
chr1	1285498	1285499	chr2	33141413	33141414
chr1	3504685	3504686	chr2	33141413	33141414
chr1	12171837	12171838	chr2	33141542	33141543
chr1	41730608	41730609	chr2	105545204	105545205
chr1	42010552	42010553	chr2	23263539	23263540
chr1	51139858	51139859	chr2	26574162	26574163
chr1	53317923	53317924	chr2	70001675	70001676
chr1	61062121	61062122	chr2	67452592	67452593
chr1	91748504	91748505	chr2	105561111	105561112
chr1	111013407	111013408	chr2	101732283	101732284
chr1	121484722	121484723	chr2	33141123	33141124
chr1	121485280	121485281	chr2	92308175	92308176
chr1	121485321	121485322	chr2	92325029	92325030
chr1	150177437	150177438	chr2	24225535	24225536
chr1	150503686	150503687	chr2	153196411	153196412
chr1	156897852	156897853	chr2	41043857	41043858
chr1	161252223	161252224	chr2	33141413	33141414
chr1	162761322	162761323	chr2	160600486	160600487
chr1	164020474	164020475	chr2	229530669	229530670
chr1	180199113	180199114	chr2	33141413	33141414
chr1	180992293	180992294	chr2	102402138	102402139
chr1	197445529	197445530	chr2	241087100	241087101
chr1	222792299	222792300	chr2	85511681	85511682
chr1	225919900	225919901	chr2	167771176	167771177
chr1	228572490	228572491	chr2	11426361	11426362
chr1	235060682	235060683	chr2	163760873	163760874
chr1	247925434	247925435	chr2	174209868	174209869
chr1	2332705	2332706	chr2	33141542	33141543
chr1	4275961	4275962	chr2	33141594	33141595
chr1	5694914	5694915	chr2	33141634	33141635
chr1	6673996	6673997	chr2	33141576	33141577
chr1	7078204	7078205	chr2	134420857	134420858
chr1	7843843	7843844	chr2	33141507	33141508
chr1	26613281	26613282	chr2	156669264	156669265
chr1	33400166	33400167	chr2	102336768	102336769
chr1	37464622	37464623	chr2	195518097	195518098
chr1	42010626	42010627	chr2	33141637	33141638
chr1	42717687	42717688	chr2	153248280	153248281
chr1	46761814	46761815	chr2	170631882	170631883
chr1	50835817	50835818	chr2	33141637	33141638
chr1	63153774	63153775	chr2	33141505	33141506
chr1	77290100	77290101	chr2	92320475	92320476
chr1	112177409	112177410	chr2	25004380	25004381
chr1	121485339	121485340	chr2	124794054	124794055
chr1	149340028	149340029	chr2	120973479	120973480
chr1	154894411	154894412	chr2	52560168	52560169
chr1	160255100	160255101	chr2	33141576	33141577
chr1	160272788	160272789	chr2	166639721	166639722
chr1	160353607	160353608	chr2	210260754	210260755
chr1	192289701	192289702	chr2	17512525	17512526
chr1	206808698	206808699	chr2	33141576	33141577
chr1	226813445	226813446	chr2	33141576	33141577
chr1	230321011	230321012	chr2	13091780	13091781
chr1	231015543	231015544	chr2	33141504	33141505
chr1	241803239	241803240	chr2	223996228	223996229
chr1	245956965	245956966	chr2	33141634	33141635
chr1	37986473	37986474	chr3	25643706	25643707
chr1	121485226	121485227	chr3	30502308	30502309
chr1	150039894	150039895	chr3	111365308	111365309
chr1	155903614	155903615	chr3	170316770	170316771
chr1	161008231	161008232	chr3	38592989	38592990
chr1	168186489	168186490	chr3	53175883	53175884
chr1	168346890	168346891	chr3	10568755	10568756
chr1	5699718	5699719	chr3	66728338	66728339
chr1	69576030	69576031	chr3	15362148	15362149
chr1	101701364	101701365	chr3	183306532	183306533
chr1	142598459	142598460	chr3	71227125	71227126
chr1	170271641	170271642	chr3	57820022	57820023
chr1	197991249	197991250	chr3	70963107	70963108
chr1	224007733	224007734	chr3	79480352	79480353
chr1	229206821	229206822	chr3	42801660	42801661
chr1	246697607	246697608	chr3	20429382	20429383
chr1	10928954	10928955	chr4	49633676	49633677
chr1	19501813	19501814	chr4	114699597	114699598
chr1	28110418	28110419	chr4	39267123	39267124
chr1	78773202	78773203	chr4	68957534	68957535
chr1	103661633	103661634	chr4	153979400	153979401
chr1	111802793	111802794	chr4	123543911	123543912
chr1	116407013	116407014	chr4	39647645	39647646
chr1	142536894	142536895	chr4	49644439	49644440
chr1	142536894	142536895	chr4	49659118	49659119
chr1	142539389	142539390	chr4	49639131	49639132
chr1	142539389	142539390	chr4	49644080	49644081
chr1	142539389	142539390	chr4	49659119	49659120
chr1	221558873	221558874	chr4	119497571	119497572
chr1	223204298	223204299	chr4	58154515	58154516
chr1	224200882	224200883	chr4	49658568	49658569
chr1	236935258	236935259	chr4	58669774	58669775
chr1	240830399	240830400	chr4	185348525	185348526
chr1	246806139	246806140	chr4	8844141	8844142
chr1	246990897	246990898	chr4	119579922	119579923
chr1	11525218	11525219	chr4	4201133	4201134
chr1	19576650	19576651	chr4	69274727	69274728
chr1	33975850	33975851	chr4	190684481	190684482
chr1	52372570	52372571	chr4	41421730	41421731
chr1	91853078	91853079	chr4	24191186	24191187
chr1	114168407	114168408	chr4	173227034	173227035
chr1	121485334	121485335	chr4	11597218	11597219
chr1	142539389	142539390	chr4	49103630	49103631
chr1	142648421	142648422	chr4	49606801	49606802
chr1	178444299	178444300	chr4	102843054	102843055
chr1	183218866	183218867	chr4	4460817	4460818
chr1	193891463	193891464	chr4	123914148	123914149
chr1	197244930	197244931	chr4	190598210	190598211
chr1	216223902	216223903	chr4	150364907	150364908
chr1	222283020	222283021	chr4	107305103	107305104
chr1	240134851	240134852	chr4	175767470	175767471
chr1	16750922	16750923	chr5	137922087	137922088
chr1	21236982	21236983	chr5	150624418	150624419
chr1	33851529	33851530	chr5	86616573	86616574
chr1	57049504	57049505	chr5	39896918	39896919
chr1	66464224	66464225	chr5	175897906	175897907
chr1	149337614	149337615	chr5	94745177	94745178
chr1	178495286	178495287	chr5	83345772	83345773
chr1	199979223	199979224	chr5	16903240	16903241
chr1	205560583	205560584	chr5	72810571	72810572
chr1	205916941	205916942	chr5	168041974	168041975
chr1	210651171	210651172	chr5	104540494	104540495
chr1	231664654	231664655	chr5	756488	756489
chr1	239567782	239567783	chr5	178948465	178948466
chr1	66178471	66178472	chr5	36372701	36372702
chr1	112736000	112736001	chr5	138072952	138072953
chr1	153716522	153716523	chr5	13395168	13395169
chr1	183908199	183908200	chr5	65602444	65602445
chr1	205793715	205793716	chr5	32504148	32504149
chr1	233742491	233742492	chr5	12811019	12811020
chr1	235512448	235512449	chr5	66171873	66171874
chr1	241379511	241379512	chr5	38356083	38356084
chr1	22421093	22421094	chr6	114068580	114068581
chr1	24311951	24311952	chr6	46341242	46341243
chr1	95014444	95014445	chr6	128398077	128398078
chr1	105556476	105556477	chr6	160521851	160521852
chr1	121485032	121485033	chr6	58778239	58778240
chr1	121485032	121485033	chr6	58778579	58778580
chr1	152886857	152886858	chr6	160521851	160521852
chr1	154141611	154141612	chr6	58778697	58778698
chr1	195551879	195551880	chr6	10370845	10370846
chr1	205429560	205429561	chr6	155512648	155512649
chr1	212490736	212490737	chr6	120650995	120650996
chr1	19799510	19799511	chr6	32728536	32728537
chr1	21440708	21440709	chr6	37938629	37938630
chr1	28336179	28336180	chr6	7430439	7430440
chr1	38432782	38432783	chr6	28863899	28863900
chr1	109570438	109570439	chr6	2713327	2713328
chr1	112117374	112117375	chr6	113771653	113771654
chr1	144581042	144581043	chr6	88417768	88417769
chr1	144951026	144951027	chr6	1137949	1137950
chr1	183383045	183383046	chr6	159166295	159166296
chr1	187842070	187842071	chr6	153751135	153751136
chr1	202223238	202223239	chr6	47708264	47708265
chr1	207360567	207360568	chr6	65987954	65987955
chr1	3641596	3641597	chr7	53680657	53680658
chr1	5532657	5532658	chr7	84780943	84780944
chr1	7951036	7951037	chr7	105741910	105741911
chr1	11133678	11133679	chr7	99719406	99719407
chr1	35708947	35708948	chr7	50112816	50112817
chr1	36139329	36139330	chr7	26329667	26329668
chr1	62617013	62617014	chr7	149962671	149962672
chr1	72068239	72068240	chr7	131851117	131851118
chr1	76545348	76545349	chr7	151548162	151548163
chr1	82253060	82253061	chr7	100539442	100539443
chr1	99622317	99622318	chr7	61968881	61968882
chr1	148855919	148855920	chr7	61660830	61660831
chr1	152315841	152315842	chr7	158765908	158765909
chr1	154303286	154303287	chr7	66356803	66356804
chr1	163071744	163071745	chr7	22085094	22085095
chr1	176733320	176733321	chr7	91515516	91515517
chr1	186678739	186678740	chr7	131208734	131208735
chr1	194076034	194076035	chr7	6026217	6026218
chr1	200791303	200791304	chr7	47537261	47537262
chr1	210507807	210507808	chr7	24477756	24477757
chr1	226265430	226265431	chr7	105469898	105469899
chr1	9439785	9439786	chr7	97769455	97769456
chr1	9543352	9543353	chr7	51494367	51494368
chr1	22421089	22421090	chr7	153966050	153966051
chr1	26490141	26490142	chr7	74132118	74132119
chr1	40510725	40510726	chr7	36100037	36100038
chr1	121484926	121484927	chr7	61969563	61969564
chr1	156701262	156701263	chr7	135100238	135100239
chr1	163520124	163520125	chr7	39932449	39932450
chr1	173251881	173251882	chr7	138200776	138200777
chr1	174333701	174333702	chr7	61789139	61789140
chr1	189247039	189247040	chr7	44849371	44849372
chr1	197273173	197273174	chr7	61970468	61970469
chr1	214743246	214743247	chr7	131553305	131553306
chr1	9003575	9003576	chr8	43092881	43092882
chr1	9288609	9288610	chr8	38675692	38675693
chr1	24235737	24235738	chr8	97276410	97276411
chr1	26557858	26557859	chr8	96750686	96750687
chr1	26730916	26730917	chr8	145588376	145588377
chr1	34943001	34943002	chr8	121839391	121839392
chr1	34973129	34973130	chr8	55431781	55431782
chr1	40169633	40169634	chr8	25828642	25828643
chr1	41432428	41432429	chr8	141962878	141962879
chr1	60870960	60870961	chr8	13975422	13975423
chr1	76011730	76011731	chr8	124117864	124117865
chr1	82312048	82312049	chr8	52737968	52737969
chr1	121485324	121485325	chr8	133446298	133446299
chr1	160233323	160233324	chr8	27470798	27470799
chr1	172263913	172263914	chr8	19671337	19671338
chr1	189051508	189051509	chr8	43095174	43095175
chr1	192815012	192815013	chr8	97176412	97176413
chr1	569100	569101	chr8	63015431	63015432
chr1	5716283	5716284	chr8	2139326	2139327
chr1	11166918	11166919	chr8	49076333	49076334
chr1	62279214	62279215	chr8	43092977	43092978
chr1	63510801	63510802	chr8	87537099	87537100
chr1	119915459	119915460	chr8	128859888	128859889
chr1	149337605	149337606	chr8	110079100	110079101
chr1	178705577	178705578	chr8	91943869	91943870
chr1	204161933	204161934	chr8	122313791	122313792
chr1	224241461	224241462	chr8	68272476	68272477
chr1	29690195	29690196	chr9	111924004	111924005
chr1	55737758	55737759	chr9	132712209	132712210
chr1	57101962	57101963	chr9	139011161	139011162
chr1	102431907	102431908	chr9	25254473	25254474
chr1	118654214	118654215	chr9	123474123	123474124
chr1	154532432	154532433	chr9	528327	528328
chr1	188252333	188252334	chr9	29215634	29215635
chr1	213101047	213101048	chr9	103022040	103022041
chr1	231833382	231833383	chr9	15535244	15535245
chr1	43369609	43369610	chr9	74816352	74816353
chr1	59479439	59479440	chr9	101377653	101377654
chr1	86730463	86730464	chr9	129563027	129563028
chr1	210435024	210435025	chr9	123474990	123474991
chr1	1497863	1497864	chr10	69086676	69086677
chr1	9137531	9137532	chr10	94022336	94022337
chr1	32980411	32980412	chr10	104923930	104923931
chr1	41753421	41753422	chr10	68428416	68428417
chr1	100253243	100253244	chr10	42385511	42385512
chr1	101921246	101921247	chr10	11812586	11812587
chr1	111896186	111896187	chr10	102036213	102036214
chr1	115202571	115202572	chr10	14655129	14655130
chr1	119542591	119542592	chr10	100531441	100531442
chr1	120167678	120167679	chr10	501421	501422
chr1	142536894	142536895	chr10	38817922	38817923
chr1	142536894	142536895	chr10	39125444	39125445
chr1	153883942	153883943	chr10	11997874	11997875
chr1	154878670	154878671	chr10	70350190	70350191
chr1	160712166	160712167	chr10	42599552	42599553
chr1	216684907	216684908	chr10	81237023	81237024
chr1	223214711	223214712	chr10	42384470	42384471
chr1	15685160	15685161	chr10	127319716	127319717
chr1	24065590	24065591	chr10	42380531	42380532
chr1	39214563	39214564	chr10	42600110	42600111
chr1	54136724	54136725	chr10	42392755	42392756
chr1	100103341	100103342	chr10	42597216	42597217
chr1	115569199	115569200	chr10	14484813	14484814
chr1	121485431	121485432	chr10	42400407	42400408
chr1	142536894	142536895	chr10	42380937	42380938
chr1	197181856	197181857	chr10	28332920	28332921
chr1	201511448	201511449	chr10	3876199	3876200
chr1	209996689	209996690	chr10	126683461	126683462
chr1	215750388	215750389	chr10	42385731	42385732
chr1	221270657	221270658	chr10	42529527	42529528
chr1	568469	568470	chr11	101445454	101445455
chr1	3703101	3703102	chr11	110318084	110318085
chr1	10160401	10160402	chr11	10843601	10843602
chr1	12625708	12625709	chr11	21068182	21068183
chr1	46467475	46467476	chr11	114424774	114424775
chr1	57699270	57699271	chr11	229285	229286
chr1	58760575	58760576	chr11	109454002	109454003
chr1	74015227	74015228	chr11	37444954	37444955
chr1	104123883	104123884	chr11	71653396	71653397
chr1	106820500	106820501	chr11	4837714	4837715
chr1	107943600	107943601	chr11	65284825	65284826
chr1	116460846	116460847	chr11	124640775	124640776
chr1	151753661	151753662	chr11	65959363	65959364
chr1	153722110	153722111	chr11	8220939	8220940
chr1	154888459	154888460	chr11	120133720	120133721
chr1	162928764	162928765	chr11	67441457	67441458
chr1	169036956	169036957	chr11	109776435	109776436
chr1	173621493	173621494	chr11	90000501	90000502
chr1	188412138	188412139	chr11	106082311	106082312
chr1	226165210	226165211	chr11	41318395	41318396
chr1	245456178	245456179	chr11	39293112	39293113
chr1	246932948	246932949	chr11	99036917	99036918
chr1	247060592	247060593	chr11	10494528	10494529
chr1	3755003	3755004	chr11	119124239	119124240
chr1	59441678	59441679	chr11	33424846	33424847
chr1	77164518	77164519	chr11	70504424	70504425
chr1	121485434	121485435	chr11	51591406	51591407
chr1	146519380	146519381	chr11	28092352	28092353
chr1	155547178	155547179	chr11	33624793	33624794
chr1	169780306	169780307	chr11	60293394	60293395
chr1	185563647	185563648	chr11	101505087	101505088
chr1	206127692	206127693	chr11	23522804	23522805
chr1	206949798	206949799	chr11	83515660	83515661
chr1	220811540	220811541	chr11	51583011	51583012
chr1	231043752	231043753	chr11	123475816	123475817
chr1	240138328	240138329	chr11	18273544	18273545
chr1	247685574	247685575	chr11	68243181	68243182
chr1	5477273	5477274	chr12	62436016	62436017
chr1	16364554	16364555	chr12	51714721	51714722
chr1	35879245	35879246	chr12	84846714	84846715
chr1	39604589	39604590	chr12	6472102	6472103
chr1	40972698	40972699	chr12	57121295	57121296
chr1	45363694	45363695	chr12	55043419	55043420
chr1	74805917	74805918	chr12	100530396	100530397
chr1	147013291	147013292	chr12	9437302	9437303
chr1	216917844	216917845	chr12	131962844	131962845
chr1	229670200	229670201	chr12	108502582	108502583
chr1	242267531	242267532	chr12	56222312	56222313
chr1	243513556	243513557	chr12	80393709	80393710
chr1	29109496	29109497	chr12	123420479	123420480
chr1	55466878	55466879	chr12	92213403	92213404
chr1	75598294	75598295	chr12	43894587	43894588
chr1	77247556	77247557	chr12	128296294	128296295
chr1	81325260	81325261	chr12	121808071	121808072
chr1	105229791	105229792	chr12	28274591	28274592
chr1	113802336	113802337	chr12	131126379	131126380
chr1	118117769	118117770	chr12	124734430	124734431
chr1	121485375	121485376	chr12	3424682	3424683
chr1	161838542	161838543	chr12	91034704	91034705
chr1	164328732	164328733	chr12	76823058	76823059
chr1	164646634	164646635	chr12	71525473	71525474
chr1	206657499	206657500	chr12	128267852	128267853
chr1	209229514	209229515	chr12	104333033	104333034
chr1	218444386	218444387	chr12	58458223	58458224
chr1	219622383	219622384	chr12	79287766	79287767
chr1	223254531	223254532	chr12	87666456	87666457
chr1	69237737	69237738	chr13	111256364	111256365
chr1	145390500	145390501	chr13	98803298	98803299
chr1	48972529	48972530	chr13	84479349	84479350
chr1	77340263	77340264	chr13	87078432	87078433
chr1	119253611	119253612	chr13	79803773	79803774
chr1	216223900	216223901	chr13	40967927	40967928
chr1	24851831	24851832	chr14	100379039	100379040
chr1	39523306	39523307	chr14	103279554	103279555
chr1	66508034	66508035	chr14	97007789	97007790
chr1	239426260	239426261	chr14	79346295	79346296
chr1	29666694	29666695	chr14	71074192	71074193
chr1	234495982	234495983	chr14	62272650	62272651
chr1	22421097	22421098	chr15	72639547	72639548
chr1	27413101	27413102	chr15	79384401	79384402
chr1	90624776	90624777	chr15	69462047	69462048
chr1	95426769	95426770	chr15	77706735	77706736
chr1	106366127	106366128	chr15	62064896	62064897
chr1	114988570	114988571	chr15	60736975	60736976
chr1	150288750	150288751	chr15	75657805	75657806
chr1	155362558	155362559	chr15	42518014	42518015
chr1	164841103	164841104	chr15	38276491	38276492
chr1	165850326	165850327	chr15	55781790	55781791
chr1	204238470	204238471	chr15	88600116	88600117
chr1	231026287	231026288	chr15	84922842	84922843
chr1	233737940	233737941	chr15	83753556	83753557
chr1	10092253	10092254	chr15	94819893	94819894
chr1	61601867	61601868	chr15	44427237	44427238
chr1	194229871	194229872	chr15	22412531	22412532
chr1	234735523	234735524	chr15	38717690	38717691
chr1	149773557	149773558	chr16	35239631	35239632
chr1	177168763	177168764	chr16	15588355	15588356
chr1	10171085	10171086	chr16	13037168	13037169
chr1	166660938	166660939	chr16	89658146	89658147
chr1	181387014	181387015	chr16	55460397	55460398
chr1	209570244	209570245	chr16	46387471	46387472
chr1	36792259	36792260	chr17	29821465	29821466
chr1	50880342	50880343	chr17	80848949	80848950
chr1	62296734	62296735	chr17	1731521	1731522
chr1	144991421	144991422	chr17	51985783	51985784
chr1	150290649	150290650	chr17	41399685	41399686
chr1	154281221	154281222	chr17	49183558	49183559
chr1	238692210	238692211	chr17	35977893	35977894
chr1	1953764	1953765	chr17	79867583	79867584
chr1	7628963	7628964	chr17	39754594	39754595
chr1	21806313	21806314	chr17	11611308	11611309
chr1	58071869	58071870	chr17	60261903	60261904
chr1	88972826	88972827	chr17	32064664	32064665
chr1	147793583	147793584	chr17	1074262	1074263
chr1	154686903	154686904	chr17	77998452	77998453
chr1	180992292	180992293	chr17	77438307	77438308
chr1	203294301	203294302	chr17	41570871	41570872
chr1	211989371	211989372	chr17	35964057	35964058
chr1	20848760	20848761	chr18	55691300	55691301
chr1	67931363	67931364	chr18	18516145	18516146
chr1	121485321	121485322	chr18	30894005	30894006
chr1	24643042	24643043	chr18	59362611	59362612
chr1	116852213	116852214	chr18	18517246	18517247
chr1	154398670	154398671	chr18	43839862	43839863
chr1	198412340	198412341	chr18	18520342	18520343
chr1	222870690	222870691	chr18	8372378	8372379
chr1	228339944	228339945	chr18	23475315	23475316
chr1	168025732	168025733	chr19	24033178	24033179
chr1	207585295	207585296	chr19	39081606	39081607
chr1	16750713	16750714	chr19	57210378	57210379
chr1	51640448	51640449	chr19	39351433	39351434
chr1	52454805	52454806	chr19	5035864	5035865
chr1	65636915	65636916	chr19	49075517	49075518
chr1	121485110	121485111	chr19	27732108	27732109
chr1	1804037	1804038	chr20	62441241	62441242
chr1	36627512	36627513	chr20	44404918	44404919
chr1	43835992	43835993	chr20	4928086	4928087
chr1	66037336	66037337	chr20	59481303	59481304
chr1	91357424	91357425	chr20	5620089	5620090
chr1	154005500	154005501	chr20	54903386	54903387
chr1	224201619	224201620	chr20	29803912	29803913
chr1	2905776	2905777	chr20	62123516	62123517
chr1	89592454	89592455	chr20	37983594	37983595
chr1	724203	724204	chr21	10777907	10777908
chr1	37813145	37813146	chr21	17900523	17900524
chr1	67550602	67550603	chr21	23626195	23626196
chr1	142539389	142539390	chr21	10804979	10804980
chr1	193201074	193201075	chr21	43282531	43282532
chr1	208514045	208514046	chr21	39879938	39879939
chr1	224204241	224204242	chr21	10813771	10813772
chr1	32646872	32646873	chr21	37273176	37273177
chr1	97386301	97386302	chr21	38282364	38282365
chr1	143436015	143436016	chr21	9685736	9685737
chr1	204808546	204808547	chr21	28188567	28188568
chr1	57016952	57016953	chr22	27874377	27874378
chr1	58760575	58760576	chr22	34333677	34333678
chr1	5862961	5862962	chr22	35929788	35929789
chr1	17204787	17204788	chr22	18880065	18880066
chr1	86003266	86003267	chr22	18882067	18882068
chr1	45904459	45904460	chrX	57993184	57993185
chr1	61390042	61390043	chrX	38232008	38232009
chr1	105589922	105589923	chrX	98134145	98134146
chr1	204276991	204276992	chrX	133924343	133924344
chr1	41586601	41586602	chrX	65434806	65434807
chr1	89026821	89026822	chrX	89638031	89638032
chr1	106505924	106505925	chrX	17633395	17633396
chr1	10610774	10610775	chrY	13468160	13468161
chr1	121485371	121485372	chrY	58990045	58990046
chr1	142538132	142538133	chrY	58980121	58980122
chr1	142542373	142542374	chrY	13447582	13447583
chr1	224953446	224953447	chrY	58827383	58827384
chr1	185333290	185333291	chrM	9117	9118
chr1	3371601	3371602	chr2	33141413	33141414
chr1	11066131	11066132	chr2	231292821	231292822
chr1	42446322	42446323	chr2	15594726	15594727
chr1	43604324	43604325	chr2	117897146	117897147
chr1	52117179	52117180	chr2	55735041	55735042
chr1	59012209	59012210	chr2	33141413	33141414
chr1	79596756	79596757	chr2	205615077	205615078
chr1	86021755	86021756	chr2	33141413	33141414
chr1	94480476	94480477	chr2	234620353	234620354
chr1	95605622	95605623	chr2	70189334	70189335
chr1	109633417	109633418	chr2	105686647	105686648
chr1	112930466	112930467	chr2	13022890	13022891
chr1	149848553	149848554	chr2	74841688	74841689
chr1	151762942	151762943	chr2	33141413	33141414
chr1	154531180	154531181	chr2	33141413	33141414
chr1	172693901	172693902	chr2	105911493	105911494
chr1	174837074	174837075	chr2	55884191	55884192
chr1	179840973	179840974	chr2	46328020	46328021
chr1	187185476	187185477	chr2	112649734	112649735
chr1	192289633	192289634	chr2	17512499	17512500
chr1	219861865	219861866	chr2	47463183	47463184
chr1	231015472	231015473	chr2	33141434	33141435
chr1	244013850	244013851	chr2	33141413	33141414
chr1	5832655	5832656	chr2	86829814	86829815
chr1	16786991	16786992	chr2	150392624	150392625
chr1	20199220	20199221	chr2	65975367	65975368
chr1	33108374	33108375	chr2	103373573	103373574
chr1	33976621	33976622	chr2	54854166	54854167
chr1	37940362	37940363	chr2	33141375	33141376
chr1	46593836	46593837	chr2	158574754	158574755
chr1	47882627	47882628	chr2	64752201	64752202
chr1	48208822	48208823	chr2	33141647	33141648
chr1	52608516	52608517	chr2	33141576	33141577
chr1	63799773	63799774	chr2	133693660	133693661
chr1	117452611	117452612	chr2	33141637	33141638
chr1	121484733	121484734	chr2	33141673	33141674
chr1	142538251	142538252	chr2	89879977	89879978
chr1	173684136	173684137	chr2	33141594	33141595
chr1	174200160	174200161	chr2	23368553	23368554
chr1	175296963	175296964	chr2	48801233	48801234
chr1	179549913	179549914	chr2	33141576	33141577
chr1	180999991	180999992	chr2	133505147	133505148
chr1	203553037	203553038	chr2	166522959	166522960
chr1	222944314	222944315	chr2	47450728	47450729
chr1	226899145	226899146	chr2	144226232	144226233
chr1	234840926	234840927	chr2	38613986	38613987
chr1	240172545	240172546	chr2	33141576	33141577
chr1	3605342	3605343	chr3	29782250	29782251
chr1	6441913	6441914	chr3	12818453	12818454
chr1	18128920	18128921	chr3	71116883	71116884
chr1	32772307	32772308	chr3	124753037	124753038
chr1	38794752	38794753	chr3	156239880	156239881
chr1	61458476	61458477	chr3	97818778	97818779
chr1	93529067	93529068	chr3	11700116	11700117
chr1	104939367	104939368	chr3	78219964	78219965
chr1	121485151	121485152	chr3	106642705	106642706
chr1	151128046	151128047	chr3	183877319	183877320
chr1	193007736	193007737	chr3	25402942	25402943
chr1	218291786	218291787	chr3	149350948	149350949
chr1	241935220	241935221	chr3	27900061	27900062
chr1	245989312	245989313	chr3	121220219	121220220
chr1	2137987	2137988	chr3	129938427	129938428
chr1	8783925	8783926	chr3	23363235	23363236
chr1	23470944	23470945	chr3	106685351	106685352
chr1	32707727	32707728	chr3	167964562	167964563
chr1	43471489	43471490	chr3	30560256	30560257
chr1	91391371	91391372	chr3	48936384	48936385
chr1	109494858	109494859	chr3	110413400	110413401
chr1	109768439	109768440	chr3	8468272	8468273
chr1	154871457	154871458	chr3	155499332	155499333
chr1	202203851	202203852	chr3	135110217	135110218
chr1	202301747	202301748	chr3	110271021	110271022
chr1	228304449	228304450	chr3	96119660	96119661
chr1	229160538	229160539	chr3	10079159	10079160
chr1	229196215	229196216	chr3	195614783	195614784
chr1	229503765	229503766	chr3	108296744	108296745
chr1	240227602	240227603	chr3	163736206	163736207
chr1	31379810	31379811	chr4	109333171	109333172
chr1	38594018	38594019	chr4	1876907	1876908
chr1	46040606	46040607	chr4	186079642	186079643
chr1	68159952	68159953	chr4	185427462	185427463
chr1	142536607	142536608	chr4	49120579	49120580
chr1	160795484	160795485	chr4	188129722	188129723
chr1	183969672	183969673	chr4	168779033	168779034
chr1	207130150	207130151	chr4	185194326	185194327
chr1	209686017	209686018	chr4	58851747	58851748
chr1	221733450	221733451	chr4	93075151	93075152
chr1	224200315	224200316	chr4	49126489	49126490
chr1	224305580	224305581	chr4	167152098	167152099
chr1	238343404	238343405	chr4	92347836	92347837
chr1	31537030	31537031	chr4	40489296	40489297
chr1	62491957	62491958	chr4	184313243	184313244
chr1	112123676	112123677	chr4	34202840	34202841
chr1	112882302	112882303	chr4	68552660	68552661
chr1	142536538	142536539	chr4	49658178	49658179
chr1	146802822	146802823	chr4	173523644	173523645
chr1	151809198	151809199	chr4	123914148	123914149
chr1	156459822	156459823	chr4	106509307	106509308
chr1	170989568	170989569	chr4	117928430	117928431
chr1	203034541	203034542	chr4	6320163	6320164
chr1	243089467	243089468	chr4	83113459	83113460
chr1	244071638	244071639	chr4	149075418	149075419
chr1	8325282	8325283	chr5	34706054	34706055
chr1	13180596	13180597	chr5	102146258	102146259
chr1	16337825	16337826	chr5	59647806	59647807
chr1	21650598	21650599	chr5	178452788	178452789
chr1	35480317	35480318	chr5	176854566	176854567
chr1	98605290	98605291	chr5	99752400	99752401
chr1	110043677	110043678	chr5	51025061	51025062
chr1	114761896	114761897	chr5	21159955	21159956
chr1	159094354	159094355	chr5	169921548	169921549
chr1	160986620	160986621	chr5	80442271	80442272
chr1	166588641	166588642	chr5	119231429	119231430
chr1	174558374	174558375	chr5	35590413	35590414
chr1	185911054	185911055	chr5	95958857	95958858
chr1	192575271	192575272	chr5	145747781	145747782
chr1	200031356	200031357	chr5	120841827	120841828
chr1	229930008	229930009	chr5	8287050	8287051
chr1	230006666	230006667	chr5	100828589	100828590
chr1	234930491	234930492	chr5	10443447	10443448
chr1	236589451	236589452	chr5	143370516	143370517
chr1	17528832	17528833	chr5	5955065	5955066
chr1	66079139	66079140	chr5	34459549	34459550
chr1	78697412	78697413	chr5	125485211	125485212
chr1	105231103	105231104	chr5	104956962	104956963
chr1	110019655	110019656	chr5	137589362	137589363
chr1	111119277	111119278	chr5	117449093	117449094
chr1	162761309	162761310	chr5	155559778	155559779
chr1	165253879	165253880	chr5	160657802	160657803
chr1	179563582	179563583	chr5	166943458	166943459
chr1	196153533	196153534	chr5	166769832	166769833
chr1	209534256	209534257	chr5	4778027	4778028
chr1	7944246	7944247	chr6	2563432	2563433
chr1	11048113	11048114	chr6	11296917	11296918
chr1	22820300	22820301	chr6	120658007	120658008
chr1	27998506	27998507	chr6	6184731	6184732
chr1	30868217	30868218	chr6	74922206	74922207
chr1	49893123	49893124	chr6	32468833	32468834
chr1	59956712	59956713	chr6	50938714	50938715
chr1	98047486	98047487	chr6	41375180	41375181
chr1	103070783	103070784	chr6	19360682	19360683
chr1	111559086	111559087	chr6	43718084	43718085
chr1	118117148	118117149	chr6	166060627	166060628
chr1	121485171	121485172	chr6	61913377	61913378
chr1	167316417	167316418	chr6	65342506	65342507
chr1	205003298	205003299	chr6	34037877	34037878
chr1	206162791	206162792	chr6	26569882	26569883
chr1	207910544	207910545	chr6	58778697	58778698
chr1	219653905	219653906	chr6	107798408	107798409
chr1	247429860	247429861	chr6	43567658	43567659
chr1	110692025	110692026	chr6	35309334	35309335
chr1	110723173	110723174	chr6	143488731	143488732
chr1	121484886	121484887	chr6	58778724	58778725
chr1	121485255	121485256	chr6	58779138	58779139
chr1	226271854	226271855	chr6	148014817	148014818
chr1	233085062	233085063	chr6	1234142	1234143
chr1	234673326	234673327	chr6	91291393	91291394
chr1	239966195	239966196	chr6	115639219	115639220
chr1	15397243	15397244	chr7	158678935	158678936
chr1	16668194	16668195	chr7	3116938	3116939
chr1	23629178	23629179	chr7	53731912	53731913
chr1	25744991	25744992	chr7	72297807	72297808
chr1	26204634	26204635	chr7	75850926	75850927
chr1	40363877	40363878	chr7	95115510	95115511
chr1	44585481	44585482	chr7	27632451	27632452
chr1	119590811	119590812	chr7	25035651	25035652
chr1	149034361	149034362	chr7	61790481	61790482
chr1	151016762	151016763	chr7	64874345	64874346
chr1	154578760	154578761	chr7	27110385	27110386
chr1	161856213	161856214	chr7	84286476	84286477
chr1	211854869	211854870	chr7	112910882	112910883
chr1	214520037	214520038	chr7	131048259	131048260
chr1	225549551	225549552	chr7	69351952	69351953
chr1	992887	992888	chr7	33180788	33180789
chr1	10660907	10660908	chr7	138791613	138791614
chr1	66434825	66434826	chr7	826583	826584
chr1	86046146	86046147	chr7	108023599	108023600
chr1	88517190	88517191	chr7	55796689	55796690
chr1	93464799	93464800	chr7	99740854	99740855
chr1	121484601	121484602	chr7	61969559	61969560
chr1	121484937	121484938	chr7	61969111	61969112
chr1	161243143	161243144	chr7	128735566	128735567
chr1	210045107	210045108	chr7	73379193	73379194
chr1	2776038	2776039	chr8	120687494	120687495
chr1	45178745	45178746	chr8	128824317	128824318
chr1	50912657	50912658	chr8	68743421	68743422
chr1	85480509	85480510	chr8	146068301	146068302
chr1	120048311	120048312	chr8	145962166	145962167
chr1	121484733	121484734	chr8	101101888	101101889
chr1	142636921	142636922	chr8	32546184	32546185
chr1	158132303	158132304	chr8	10692694	10692695
chr1	159384460	159384461	chr8	25885067	25885068
chr1	162612137	162612138	chr8	140729732	140729733
chr1	178709843	178709844	chr8	128138563	128138564
chr1	195546648	195546649	chr8	68123006	68123007
chr1	17106156	17106157	chr8	108468084	108468085
chr1	45259901	45259902	chr8	126339940	126339941
chr1	57242618	57242619	chr8	141361279	141361280
chr1	65482866	65482867	chr8	28687867	28687868
chr1	69676183	69676184	chr8	40795627	40795628
chr1	87014715	87014716	chr8	117115714	117115715
chr1	94125610	94125611	chr8	98862717	98862718
chr1	166754898	166754899	chr8	130987593	130987594
chr1	185527093	185527094	chr8	67827332	67827333
chr1	197223021	197223022	chr8	120125027	120125028
chr1	207898656	207898657	chr8	137339549	137339550
chr1	229284134	229284135	chr8	92818865	92818866
chr1	242793179	242793180	chr8	29710310	29710311
chr1	243377881	243377882	chr8	6469438	6469439
chr1	27853366	27853367	chr9	17829592	17829593
chr1	38446811	38446812	chr9	131807766	131807767
chr1	50750550	50750551	chr9	89761665	89761666
chr1	58538369	58538370	chr9	18898763	18898764
chr1	75546030	75546031	chr9	102813933	102813934
chr1	78112037	78112038	chr9	118247940	118247941
chr1	116144019	116144020	chr9	78908514	78908515
chr1	151348817	151348818	chr9	128486562	128486563
chr1	204003755	204003756	chr9	136064134	136064135
chr1	204581199	204581200	chr9	38303427	38303428
chr1	205575801	205575802	chr9	18908680	18908681
chr1	248315422	248315423	chr9	113341873	113341874
chr1	19501815	19501816	chr9	115804783	115804784
chr1	114565963	114565964	chr9	112497984	112497985
chr1	160960278	160960279	chr9	95297414	95297415
chr1	221248686	221248687	chr9	23075120	23075121
chr1	7708053	7708054	chr10	6913593	6913594
chr1	31971542	31971543	chr10	24768902	24768903
chr1	35001287	35001288	chr10	17290380	17290381
chr1	36076182	36076183	chr10	70261891	70261892
chr1	45097389	45097390	chr10	12247178	12247179
chr1	86392749	86392750	chr10	25707687	25707688
chr1	91539479	91539480	chr10	49216085	49216086
chr1	145152719	145152720	chr10	127593414	127593415
chr1	171728612	171728613	chr10	71203788	71203789
chr1	179313555	179313556	chr10	12109121	12109122
chr1	229954005	229954006	chr10	131880074	131880075
chr1	234030446	234030447	chr10	127000440	127000441
chr1	73580386	73580387	chr10	95761180	95761181
chr1	193086722	193086723	chr10	105186622	105186623
chr1	232944336	232944337	chr10	127412061	127412062
chr1	2071810	2071811	chr11	61145202	61145203
chr1	11993863	11993864	chr11	121287262	121287263
chr1	57888185	57888186	chr11	131721889	131721890
chr1	70194909	70194910	chr11	129070188	129070189
chr1	88514077	88514078	chr11	76584422	76584423
chr1	92908641	92908642	chr11	31592597	31592598
chr1	98605294	98605295	chr11	744548	744549
chr1	99493618	99493619	chr11	101017654	101017655
chr1	103047686	103047687	chr11	65503483	65503484
chr1	145319388	145319389	chr11	118616362	118616363
chr1	146532811	146532812	chr11	119379608	119379609
chr1	150332026	150332027	chr11	63413516	63413517
chr1	154862822	154862823	chr11	60952941	60952942
chr1	188060818	188060819	chr11	110041519	110041520
chr1	232447859	232447860	chr11	84593001	84593002
chr1	29473876	29473877	chr11	94868685	94868686
chr1	58305490	58305491	chr11	26087159	26087160
chr1	83163031	83163032	chr11	113323192	113323193
chr1	180520515	180520516	chr11	106688404	106688405
chr1	229567858	229567859	chr11	82038313	82038314
chr1	245291194	245291195	chr11	83431057	83431058
chr1	3177262	3177263	chr12	133040927	133040928
chr1	11991861	11991862	chr12	19399431	19399432
chr1	16775758	16775759	chr12	3693019	3693020
chr1	44273715	44273716	chr12	54843325	54843326
chr1	55898580	55898581	chr12	66451447	66451448
chr1	63086555	63086556	chr12	66451373	66451374
chr1	64958062	64958063	chr12	95804330	95804331
chr1	92530285	92530286	chr12	66451373	66451374
chr1	95129202	95129203	chr12	66451373	66451374
chr1	150711517	150711518	chr12	89636416	89636417
chr1	167310144	167310145	chr12	29860918	29860919
chr1	167687347	167687348	chr12	102047699	102047700
chr1	182838567	182838568	chr12	27585586	27585587
chr1	207405677	207405678	chr12	122037336	122037337
chr1	231664668	231664669	chr12	19652706	19652707
chr1	5489805	5489806	chr12	28575641	28575642
chr1	16034822	16034823	chr12	29327463	29327464
chr1	67693618	67693619	chr12	58856513	58856514
chr1	105760160	105760161	chr12	51735453	51735454
chr1	157204685	157204686	chr12	79075356	79075357
chr1	166006702	166006703	chr12	52625352	52625353
chr1	223720251	223720252	chr12	98229048	98229049
chr1	223720251	223720252	chr12	121844107	121844108
chr1	1529011	1529012	chr13	31428558	31428559
chr1	40855617	40855618	chr13	111468910	111468911
chr1	84513009	84513010	chr13	54390038	54390039
chr1	107118341	107118342	chr13	25313867	25313868
chr1	150924592	150924593	chr13	101062072	101062073
chr1	186325429	186325430	chr13	109835887	109835888
chr1	231648996	231648997	chr13	51970087	51970088
chr1	56413536	56413537	chr13	93034482	93034483
chr1	93498220	93498221	chr13	64109293	64109294
chr1	157950578	157950579	chr13	25938328	25938329
chr1	221465516	221465517	chr13	38060444	38060445
chr1	16541292	16541293	chr14	37901043	37901044
chr1	33258262	33258263	chr14	32663352	32663353
chr1	45997903	45997904	chr14	81609250	81609251
chr1	84234634	84234635	chr14	42310069	42310070
chr1	153823114	153823115	chr14	49778489	49778490
chr1	196930159	196930160	chr14	72906516	72906517
chr1	94008652	94008653	chr14	66139479	66139480
chr1	183569403	183569404	chr14	69259846	69259847
chr1	5668048	5668049	chr15	60646959	60646960
chr1	44494183	44494184	chr15	38211483	38211484
chr1	56273586	56273587	chr15	77910871	77910872
chr1	92780377	92780378	chr15	48262202	48262203
chr1	191721266	191721267	chr15	62639267	62639268
chr1	4734699	4734700	chr15	90774603	90774604
chr1	10243499	10243500	chr15	100810993	100810994
chr1	48593777	48593778	chr15	99883142	99883143
chr1	76530292	76530293	chr15	27951211	27951212
chr1	156498595	156498596	chr15	70450302	70450303
chr1	178082647	178082648	chr15	101066718	101066719
chr1	208260294	208260295	chr15	87507263	87507264
chr1	43490935	43490936	chr16	71968396	71968397
chr1	48532729	48532730	chr16	83050745	83050746
chr1	95503626	95503627	chr16	58724265	58724266
chr1	121355702	121355703	chr16	10071069	10071070
chr1	142538251	142538252	chr16	33887638	33887639
chr1	155652679	155652680	chr16	4865319	4865320
chr1	185102867	185102868	chr16	74717088	74717089
chr1	205509136	205509137	chr16	54474104	54474105
chr1	27816609	27816610	chr16	67410611	67410612
chr1	27935503	27935504	chr16	76627303	76627304
chr1	32903265	32903266	chr16	71395629	71395630
chr1	43252985	43252986	chr16	53874975	53874976
chr1	142637738	142637739	chr16	33961323	33961324
chr1	154842200	154842201	chr16	56849842	56849843
chr1	165977266	165977267	chr16	59400823	59400824
chr1	182420845	182420846	chr16	1892965	1892966
chr1	1786852	1786853	chr17	74046817	74046818
chr1	7093958	7093959	chr17	39912865	39912866
chr1	9047394	9047395	chr17	33357753	33357754
chr1	24346417	24346418	chr17	42367473	42367474
chr1	46301420	46301421	chr17	79217209	79217210
chr1	100797664	100797665	chr17	41535935	41535936
chr1	144526644	144526645	chr17	31026178	31026179
chr1	150494993	150494994	chr17	38338688	38338689
chr1	153766551	153766552	chr17	19778829	19778830
chr1	154842200	154842201	chr17	49909028	49909029
chr1	162761309	162761310	chr17	18887373	18887374
chr1	168724933	168724934	chr17	73191447	73191448
chr1	169345351	169345352	chr17	59385258	59385259
chr1	204373394	204373395	chr17	38639689	38639690
chr1	12625705	12625706	chr17	4898844	4898845
chr1	26095577	26095578	chr17	1891054	1891055
chr1	28784664	28784665	chr17	12992516	12992517
chr1	29840205	29840206	chr17	41662882	41662883
chr1	33564952	33564953	chr17	63958347	63958348
chr1	78178335	78178336	chr17	39158646	39158647
chr1	105803344	105803345	chr17	68785516	68785517
chr1	113488354	113488355	chr17	35714097	35714098
chr1	179625917	179625918	chr17	29694749	29694750
chr1	210413296	210413297	chr17	42390498	42390499
chr1	55662522	55662523	chr18	19446479	19446480
chr1	153732555	153732556	chr18	29361192	29361193
chr1	237380998	237380999	chr18	11672240	11672241
chr1	241263394	241263395	chr18	67160053	67160054
chr1	11775256	11775257	chr18	31607008	31607009
chr1	76856637	76856638	chr18	50966442	50966443
chr1	100067489	100067490	chr19	31166043	31166044
chr1	121485046	121485047	chr19	27734306	27734307
chr1	199912459	199912460	chr19	45828385	45828386
chr1	201745491	201745492	chr19	39120231	39120232
chr1	212406801	212406802	chr19	37263021	37263022
chr1	38241383	38241384	chr19	11422016	11422017
chr1	199749346	199749347	chr19	34636718	34636719
chr1	16504991	16504992	chr20	32222203	32222204
chr1	40861250	40861251	chr20	20795922	20795923
chr1	68151076	68151077	chr20	46202005	46202006
chr1	94903858	94903859	chr20	13543594	13543595
chr1	97234745	97234746	chr20	13573424	13573425
chr1	113581881	113581882	chr20	5561817	5561818
chr1	118646459	118646460	chr20	56461480	56461481
chr1	200673999	200674000	chr20	12000226	12000227
chr1	187796412	187796413	chr20	17500151	17500152
chr1	48209294	48209295	chr21	44757129	44757130
chr1	59742951	59742952	chr21	35574754	35574755
chr1	142538251	142538252	chr21	10793879	10793880
chr1	224201505	224201506	chr21	10826854	10826855
chr1	45592297	45592298	chr22	21289398	21289399
chr1	95323127	95323128	chr22	22276141	22276142
chr1	177931490	177931491	chr22	45646045	45646046
chr1	216223962	216223963	chr22	28124535	28124536
chr1	232869263	232869264	chr22	34795599	34795600
chr1	22751588	22751589	chr22	17845489	17845490
chr1	74880818	74880819	chr22	37259658	37259659
chr1	22538482	22538483	chrX	99281665	99281666
chr1	46516615	46516616	chrX	151106577	151106578
chr1	107912008	107912009	chrX	57168735	57168736
chr1	121484846	121484847	chrX	61731053	61731054
chr1	171252934	171252935	chrX	130892532	130892533
chr1	5378036	5378037	chrX	143785014	143785015
chr1	53897790	53897791	chrX	96584891	96584892
chr1	62540597	62540598	chrX	29106405	29106406
chr1	96463051	96463052	chrX	151166222	151166223
chr1	110688814	110688815	chrX	45915970	45915971
chr1	112123683	112123684	chrX	8375706	8375707
chr1	233922867	233922868	chrX	16487803	16487804
chr1	86882100	86882101	chrY	58862676	58862677
chr2	2625408	2625409	chr3	9321302	9321303
chr2	21796818	21796819	chr3	41523028	41523029
chr2	27339841	27339842	chr3	33028144	33028145
chr2	33141576	33141577	chr3	23986501	23986502
chr2	33141594	33141595	chr3	52312661	52312662
chr2	33141594	33141595	chr3	185543387	185543388
chr2	34445792	34445793	chr3	89391205	89391206
chr2	86761458	86761459	chr3	57319156	57319157
chr2	101224812	101224813	chr3	34908663	34908664
chr2	128965938	128965939	chr3	41882974	41882975
chr2	153248280	153248281	chr3	178096812	178096813
chr2	163050810	163050811	chr3	132067844	132067845
chr2	169682976	169682977	chr3	6009212	6009213
chr2	174621593	174621594	chr3	196625615	196625616
chr2	185732420	185732421	chr3	118856490	118856491
chr2	201118603	201118604	chr3	169915225	169915226
chr2	205743558	205743559	chr3	122143545	122143546
chr2	225503486	225503487	chr3	191249839	191249840
chr2	241579701	241579702	chr3	51756434	51756435
chr2	19553846	19553847	chr3	150480156	150480157
chr2	28913711	28913712	chr3	124937359	124937360
chr2	33141576	33141577	chr3	61121930	61121931
chr2	33141576	33141577	chr3	126582084	126582085
chr2	38738837	38738838	chr3	112320407	112320408
chr2	44110611	44110612	chr3	55587309	55587310
chr2	51977323	51977324	chr3	69342594	69342595
chr2	58219970	58219971	chr3	19035452	19035453
chr2	64707155	64707156	chr3	122549848	122549849
chr2	64747394	64747395	chr3	142303267	142303268
chr2	81109149	81109150	chr3	162717306	162717307
chr2	85175269	85175270	chr3	5120462	5120463
chr2	97412979	97412980	chr3	116495670	116495671
chr2	110426509	110426510	chr3	68964685	68964686
chr2	119951741	119951742	chr3	1003194	1003195
chr2	137996427	137996428	chr3	19035447	19035448
chr2	155654733	155654734	chr3	1567548	1567549
chr2	158510364	158510365	chr3	185017661	185017662
chr2	182262200	182262201	chr3	172453726	172453727
chr2	187909418	187909419	chr3	17020825	17020826
chr2	195884304	195884305	chr3	31834268	31834269
chr2	9321618	9321619	chr4	85367752	85367753
chr2	21576068	21576069	chr4	89153047	89153048
chr2	33141576	33141577	chr4	154074509	154074510
chr2	33141637	33141638	chr4	161449777	161449778
chr2	36560328	36560329	chr4	184444481	184444482
chr2	42052609	42052610	chr4	66413927	66413928
chr2	44825850	44825851	chr4	177734512	177734513
chr2	54145642	54145643	chr4	86986359	86986360
chr2	65080630	65080631	chr4	71885780	71885781
chr2	99737920	99737921	chr4	138006153	138006154
chr2	121921497	121921498	chr4	31841420	31841421
chr2	160562439	160562440	chr4	190389852	190389853
chr2	209111019	209111020	chr4	49105318	49105319
chr2	11930024	11930025	chr4	162053250	162053251
chr2	33141520	33141521	chr4	24294970	24294971
chr2	33141521	33141522	chr4	42550734	42550735
chr2	33141576	33141577	chr4	153896070	153896071
chr2	33141594	33141595	chr4	102268745	102268746
chr2	33141637	33141638	chr4	84256060	84256061
chr2	33261824	33261825	chr4	82467633	82467634
chr2	82485519	82485520	chr4	2001213	2001214
chr2	100564134	100564135	chr4	13575046	13575047
chr2	117248023	117248024	chr4	36610161	36610162
chr2	148360889	148360890	chr4	86470370	86470371
chr2	157151334	157151335	chr4	104843243	104843244
chr2	176352733	176352734	chr4	141051961	141051962
chr2	198783691	198783692	chr4	155338347	155338348
chr2	203518960	203518961	chr4	178655567	178655568
chr2	33141576	33141577	chr5	36876684	36876685
chr2	33141576	33141577	chr5	134477478	134477479
chr2	33141576	33141577	chr5	141061513	141061514
chr2	33141576	33141577	chr5	179738992	179738993
chr2	33141576	33141577	chr5	179921505	179921506
chr2	33141576	33141577	chr5	180619274	180619275
chr2	33141594	33141595	chr5	118459079	118459080
chr2	33141634	33141635	chr5	173237748	173237749
chr2	47892151	47892152	chr5	2242071	2242072
chr2	66658983	66658984	chr5	138567163	138567164
chr2	86580703	86580704	chr5	153746458	153746459
chr2	157676692	157676693	chr5	39024267	39024268
chr2	163232963	163232964	chr5	176568420	176568421
chr2	218263221	218263222	chr5	123328253	123328254
chr2	222321473	222321474	chr5	22349231	22349232
chr2	242932794	242932795	chr5	160064005	160064006
chr2	22215730	22215731	chr5	67095541	67095542
chr2	27339791	27339792	chr5	97407144	97407145
chr2	33141576	33141577	chr5	169756921	169756922
chr2	33141594	33141595	chr5	4229734	4229735
chr2	33141594	33141595	chr5	95998033	95998034
chr2	33141637	33141638	chr5	1061232	1061233
chr2	33141637	33141638	chr5	5272601	5272602
chr2	33141641	33141642	chr5	138173574	138173575
chr2	109889064	109889065	chr5	127717381	127717382
chr2	160159004	160159005	chr5	55932155	55932156
chr2	185918460	185918461	chr5	99304383	99304384
chr2	210212551	210212552	chr5	34459559	34459560
chr2	32737769	32737770	chr6	115832775	115832776
chr2	33141576	33141577	chr6	169019113	169019114
chr2	33141635	33141636	chr6	158195252	158195253
chr2	33141647	33141648	chr6	33422530	33422531
chr2	42342939	42342940	chr6	139205263	139205264
chr2	67876600	67876601	chr6	79971147	79971148
chr2	70117182	70117183	chr6	141811278	141811279
chr2	82565606	82565607	chr6	169346033	169346034
chr2	92313207	92313208	chr6	58778087	58778088
chr2	116972858	116972859	chr6	153895703	153895704
chr2	138534080	138534081	chr6	154892158	154892159
chr2	201744141	201744142	chr6	58778697	58778698
chr2	202031694	202031695	chr6	33801351	33801352
chr2	233845893	233845894	chr6	92474603	92474604
chr2	33141576	33141577	chr6	53212868	53212869
chr2	33141576	33141577	chr6	79943676	79943677
chr2	78446201	78446202	chr6	36566159	36566160
chr2	81875639	81875640	chr6	146568645	146568646
chr2	106163164	106163165	chr6	26898095	26898096
chr2	117834063	117834064	chr6	57535802	57535803
chr2	131621788	131621789	chr6	119558697	119558698
chr2	144096171	144096172	chr6	98033751	98033752
chr2	163609538	163609539	chr6	65987954	65987955
chr2	184298401	184298402	chr6	143513469	143513470
chr2	212843124	212843125	chr6	10472369	10472370
chr2	220985961	220985962	chr6	47285006	47285007
chr2	17992408	17992409	chr7	127717551	127717552
chr2	33141576	33141577	chr7	651432	651433
chr2	33141576	33141577	chr7	24612941	24612942
chr2	33141594	33141595	chr7	128379366	128379367
chr2	33141594	33141595	chr7	150892794	150892795
chr2	33141635	33141636	chr7	102153256	102153257
chr2	33141637	33141638	chr7	44041592	44041593
chr2	33141637	33141638	chr7	123174815	123174816
chr2	33141647	33141648	chr7	157600860	157600861
chr2	35041846	35041847	chr7	38261777	38261778
chr2	60412061	60412062	chr7	138504448	138504449
chr2	83188339	83188340	chr7	141624074	141624075
chr2	85526857	85526858	chr7	84746965	84746966
chr2	89843963	89843964	chr7	61752844	61752845
chr2	92308097	92308098	chr7	61969433	61969434
chr2	118281172	118281173	chr7	18429672	18429673
chr2	119330221	119330222	chr7	88800672	88800673
chr2	122236430	122236431	chr7	36555118	36555119
chr2	124372565	124372566	chr7	61969003	61969004
chr2	135477089	135477090	chr7	52896542	52896543
chr2	205320022	205320023	chr7	91571217	91571218
chr2	213601691	213601692	chr7	130750694	130750695
chr2	10278694	10278695	chr7	44964591	44964592
chr2	33141594	33141595	chr7	157392793	157392794
chr2	33141634	33141635	chr7	139709871	139709872
chr2	33141647	33141648	chr7	88388727	88388728
chr2	56170288	56170289	chr7	113637809	113637810
chr2	80684817	80684818	chr7	16572440	16572441
chr2	84239395	84239396	chr7	27307052	27307053
chr2	106163161	106163162	chr7	29739657	29739658
chr2	106845389	106845390	chr7	56303637	56303638
chr2	142325353	142325354	chr7	12460828	12460829
chr2	146375085	146375086	chr7	101132939	101132940
chr2	206972634	206972635	chr7	73144579	73144580
chr2	225461759	225461760	chr7	133518442	133518443
chr2	227702276	227702277	chr7	13066636	13066637
chr2	12963232	12963233	chr8	77565427	77565428
chr2	33141594	33141595	chr8	64081103	64081104
chr2	53591432	53591433	chr8	98369543	98369544
chr2	132985480	132985481	chr8	46898937	46898938
chr2	134715585	134715586	chr8	110282320	110282321
chr2	148823622	148823623	chr8	68988426	68988427
chr2	196285489	196285490	chr8	94441894	94441895
chr2	200526073	200526074	chr8	76966619	76966620
chr2	215643939	215643940	chr8	4277910	4277911
chr2	28299669	28299670	chr8	139274861	139274862
chr2	33141576	33141577	chr8	124428630	124428631
chr2	33141576	33141577	chr8	133192274	133192275
chr2	33141576	33141577	chr8	142300482	142300483
chr2	33141634	33141635	chr8	102217276	102217277
chr2	33141637	33141638	chr8	143353982	143353983
chr2	33141647	33141648	chr8	145134103	145134104
chr2	68587791	68587792	chr8	126045072	126045073
chr2	76665127	76665128	chr8	78027339	78027340
chr2	103280692	103280693	chr8	118792872	118792873
chr2	111916873	111916874	chr8	851175	851176
chr2	216049298	216049299	chr8	2886285	2886286
chr2	228547276	228547277	chr8	128111175	128111176
chr2	232443687	232443688	chr8	33285105	33285106
chr2	13091794	13091795	chr9	69014729	69014730
chr2	31559689	31559690	chr9	36423658	36423659
chr2	33141521	33141522	chr9	138994321	138994322
chr2	33141576	33141577	chr9	116255546	116255547
chr2	33141576	33141577	chr9	138916208	138916209
chr2	33141594	33141595	chr9	116327665	116327666
chr2	33141594	33141595	chr9	131790645	131790646
chr2	33141594	33141595	chr9	132216732	132216733
chr2	33141637	33141638	chr9	94345547	94345548
chr2	33141637	33141638	chr9	135394372	135394373
chr2	33141637	33141638	chr9	135545926	135545927
chr2	33141647	33141648	chr9	140063438	140063439
chr2	37151005	37151006	chr9	15804640	15804641
chr2	41565113	41565114	chr9	109841948	109841949
chr2	149690583	149690584	chr9	76945763	76945764
chr2	194524679	194524680	chr9	66822322	66822323
chr2	218149826	218149827	chr9	21802985	21802986
chr2	223144050	223144051	chr9	122796276	122796277
chr2	224039700	224039701	chr9	109426678	109426679
chr2	33141402	33141403	chr9	38620373	38620374
chr2	33141576	33141577	chr9	134943354	134943355
chr2	33141576	33141577	chr9	138148349	138148350
chr2	33141576	33141577	chr9	139944737	139944738
chr2	72320869	72320870	chr9	96830388	96830389
chr2	113216609	113216610	chr9	133830691	133830692
chr2	114682803	114682804	chr9	69007634	69007635
chr2	147200511	147200512	chr9	19839221	19839222
chr2	174971470	174971471	chr9	127082834	127082835
chr2	218180770	218180771	chr9	608322	608323
chr2	220234422	220234423	chr9	111723531	111723532
chr2	223694879	223694880	chr9	115284268	115284269
chr2	229593763	229593764	chr9	13875033	13875034
chr2	231797875	231797876	chr9	97451780	97451781
chr2	237343213	237343214	chr9	22528089	22528090
chr2	20179566	20179567	chr10	3498143	3498144
chr2	27683816	27683817	chr10	101016153	101016154
chr2	29251825	29251826	chr10	42385533	42385534
chr2	33141576	33141577	chr10	9369120	9369121
chr2	33141576	33141577	chr10	98592727	98592728
chr2	33141594	33141595	chr10	35416175	35416176
chr2	33141634	33141635	chr10	43583755	43583756
chr2	33141793	33141794	chr10	42596663	42596664
chr2	41372593	41372594	chr10	39138131	39138132
chr2	64556316	64556317	chr10	14846766	14846767
chr2	89842368	89842369	chr10	42596909	42596910
chr2	89843120	89843121	chr10	42384682	42384683
chr2	89867520	89867521	chr10	42363342	42363343
chr2	113754855	113754856	chr10	80514742	80514743
chr2	148400378	148400379	chr10	42398594	42398595
chr2	182133574	182133575	chr10	13748750	13748751
chr2	208963326	208963327	chr10	133064920	133064921
chr2	33141388	33141389	chr10	42387337	42387338
chr2	33141626	33141627	chr10	42597164	42597165
chr2	34146642	34146643	chr10	72267533	72267534
chr2	70661277	70661278	chr10	79333484	79333485
chr2	78973892	78973893	chr10	42380513	42380514
chr2	88605271	88605272	chr10	42599224	42599225
chr2	90373659	90373660	chr10	42597884	42597885
chr2	142225394	142225395	chr10	27545765	27545766
chr2	161149617	161149618	chr10	42385461	42385462
chr2	181582927	181582928	chr10	42400446	42400447
chr2	188975671	188975672	chr10	42600104	42600105
chr2	194130088	194130089	chr10	42385731	42385732
chr2	224095643	224095644	chr10	72814853	72814854
chr2	231084130	231084131	chr10	6892690	6892691
chr2	20364987	20364988	chr11	44963800	44963801
chr2	33141576	33141577	chr11	611814	611815
chr2	33141576	33141577	chr11	64110394	64110395
chr2	33141576	33141577	chr11	65689435	65689436
chr2	33141576	33141577	chr11	126011216	126011217
chr2	33141594	33141595	chr11	35440978	35440979
chr2	51147170	51147171	chr11	131790130	131790131
chr2	99863381	99863382	chr11	71642529	71642530
chr2	112721976	112721977	chr11	3133232	3133233
chr2	191554754	191554755	chr11	131134887	131134888
chr2	198660293	198660294	chr11	39796756	39796757
chr2	216928672	216928673	chr11	64183621	64183622
chr2	3142216	3142217	chr11	126321243	126321244
chr2	18882777	18882778	chr11	87137492	87137493
chr2	22969318	22969319	chr11	61300540	61300541
chr2	25133803	25133804	chr11	67899659	67899660
chr2	33141576	33141577	chr11	68844745	68844746
chr2	37979924	37979925	chr11	70042511	70042512
chr2	48563200	48563201	chr11	65382158	65382159
chr2	57733255	57733256	chr11	18115333	18115334
chr2	64777864	64777865	chr11	76778717	76778718
chr2	71408332	71408333	chr11	64740742	64740743
chr2	107287997	107287998	chr11	114469016	114469017
chr2	140055042	140055043	chr11	116290629	116290630
chr2	151088450	151088451	chr11	51591230	51591231
chr2	193594180	193594181	chr11	68974051	68974052
chr2	204946071	204946072	chr11	65590442	65590443
chr2	2583460	2583461	chr12	74126775	74126776
chr2	6471473	6471474	chr12	66451373	66451374
chr2	13075121	13075122	chr12	23897766	23897767
chr2	33141525	33141526	chr12	12742871	12742872
chr2	33141576	33141577	chr12	63306243	63306244
chr2	33141637	33141638	chr12	131781131	131781132
chr2	33141637	33141638	chr12	133121219	133121220
chr2	47571900	47571901	chr12	81648025	81648026
chr2	50116404	50116405	chr12	86520388	86520389
chr2	83536854	83536855	chr12	125593776	125593777
chr2	95828187	95828188	chr12	50423034	50423035
chr2	105235879	105235880	chr12	39115219	39115220
chr2	113104366	113104367	chr12	108972429	108972430
chr2	165065293	165065294	chr12	132514636	132514637
chr2	174806974	174806975	chr12	94674758	94674759
chr2	176725199	176725200	chr12	116537975	116537976
chr2	194083179	194083180	chr12	28226414	28226415
chr2	221203425	221203426	chr12	79882213	79882214
chr2	21042981	21042982	chr12	32164453	32164454
chr2	24933213	24933214	chr12	95615384	95615385
chr2	33141576	33141577	chr12	118536186	118536187
chr2	33141594	33141595	chr12	14932533	14932534
chr2	33141634	33141635	chr12	133174719	133174720
chr2	33141637	33141638	chr12	50557210	50557211
chr2	33141642	33141643	chr12	124952762	124952763
chr2	92313001	92313002	chr12	80879380	80879381
chr2	109156943	109156944	chr12	46175166	46175167
chr2	122542639	122542640	chr12	526074	526075
chr2	137447655	137447656	chr12	66451462	66451463
chr2	143530796	143530797	chr12	108381771	108381772
chr2	160064094	160064095	chr12	100820347	100820348
chr2	195202291	195202292	chr12	27425507	27425508
chr2	198238879	198238880	chr12	132953607	132953608
chr2	232444503	232444504	chr12	132024075	132024076
chr2	74694853	74694854	chr13	99702657	99702658
chr2	76603971	76603972	chr13	111732429	111732430
chr2	100425541	100425542	chr13	109673940	109673941
chr2	191626160	191626161	chr13	90403146	90403147
chr2	7328907	7328908	chr13	27050046	27050047
chr2	10557701	10557702	chr13	50749868	50749869
chr2	29006635	29006636	chr13	110716779	110716780
chr2	33141504	33141505	chr13	111465799	111465800
chr2	33141576	33141577	chr13	61175268	61175269
chr2	33141576	33141577	chr13	111465646	111465647
chr2	48842701	48842702	chr13	20697631	20697632
chr2	61424373	61424374	chr13	19300227	19300228
chr2	65079066	65079067	chr13	110925188	110925189
chr2	210662004	210662005	chr13	31185240	31185241
chr2	49214976	49214977	chr14	26697160	26697161
chr2	100347054	100347055	chr14	74737096	74737097
chr2	115271083	115271084	chr14	33565216	33565217
chr2	152368794	152368795	chr14	95282370	95282371
chr2	189866982	189866983	chr14	95099426	95099427
chr2	223120108	223120109	chr14	67562760	67562761
chr2	9931902	9931903	chr14	74391004	74391005
chr2	33141594	33141595	chr14	103783236	103783237
chr2	33141637	33141638	chr14	75230440	75230441
chr2	35863194	35863195	chr14	103521575	103521576
chr2	131529851	131529852	chr14	104275493	104275494
chr2	25053301	25053302	chr15	97098741	97098742
chr2	33141594	33141595	chr15	68119015	68119016
chr2	101425622	101425623	chr15	81205873	81205874
chr2	106977382	106977383	chr15	40672850	40672851
chr2	107263239	107263240	chr15	75869999	75870000
chr2	231849005	231849006	chr15	67093042	67093043
chr2	242043860	242043861	chr15	100097935	100097936
chr2	242956749	242956750	chr15	90391130	90391131
chr2	207229	207230	chr15	94265735	94265736
chr2	25254829	25254830	chr15	59185548	59185549
chr2	28804767	28804768	chr15	93476065	93476066
chr2	33141632	33141633	chr15	30241861	30241862
chr2	33141637	33141638	chr15	95210609	95210610
chr2	65091812	65091813	chr15	99331284	99331285
chr2	84728731	84728732	chr15	89212831	89212832
chr2	192998658	192998659	chr15	41170608	41170609
chr2	18053424	18053425	chr16	19476400	19476401
chr2	33141576	33141577	chr16	20421185	20421186
chr2	33141576	33141577	chr16	89602910	89602911
chr2	42540287	42540288	chr16	21727420	21727421
chr2	45338980	45338981	chr16	48153385	48153386
chr2	159406653	159406654	chr16	67005698	67005699
chr2	171235693	171235694	chr16	46407345	46407346
chr2	222106051	222106052	chr16	77577839	77577840
chr2	242411342	242411343	chr16	63982786	63982787
chr2	25720185	25720186	chr16	46392237	46392238
chr2	33141637	33141638	chr16	81702700	81702701
chr2	61363751	61363752	chr16	69772314	69772315
chr2	89846770	89846771	chr16	34195987	34195988
chr2	89861557	89861558	chr16	33869989	33869990
chr2	180166622	180166623	chr16	78132332	78132333
chr2	2824197	2824198	chr17	3538488	3538489
chr2	20780193	20780194	chr17	36399835	36399836
chr2	32622657	32622658	chr17	8421344	8421345
chr2	33141521	33141522	chr17	1957328	1957329
chr2	33141576	33141577	chr17	48069038	48069039
chr2	33141576	33141577	chr17	66244314	66244315
chr2	33141576	33141577	chr17	77000243	77000244
chr2	33141618	33141619	chr17	38470453	38470454
chr2	33141634	33141635	chr17	34901533	34901534
chr2	33141634	33141635	chr17	43062403	43062404
chr2	54854166	54854167	chr17	4046538	4046539
chr2	68479730	68479731	chr17	72919857	72919858
chr2	74067807	74067808	chr17	8596192	8596193
chr2	100745878	100745879	chr17	34413619	34413620
chr2	106616510	106616511	chr17	27715223	27715224
chr2	132226207	132226208	chr17	50945988	50945989
chr2	148817582	148817583	chr17	64349697	64349698
chr2	153997622	153997623	chr17	74377275	74377276
chr2	213188551	213188552	chr17	49891565	49891566
chr2	33141576	33141577	chr17	3796157	3796158
chr2	33141576	33141577	chr17	7142866	7142867
chr2	33141576	33141577	chr17	42907538	42907539
chr2	33141576	33141577	chr17	43319334	43319335
chr2	33141624	33141625	chr17	33308083	33308084
chr2	33865279	33865280	chr17	32239725	32239726
chr2	33988898	33988899	chr17	36960551	36960552
chr2	60399609	60399610	chr17	27443643	27443644
chr2	65840317	65840318	chr17	48647950	48647951
chr2	71483032	71483033	chr17	42409588	42409589
chr2	74565548	74565549	chr17	29401930	29401931
chr2	92148990	92148991	chr17	74774990	74774991
chr2	103660714	103660715	chr17	73895188	73895189
chr2	112009180	112009181	chr17	64795539	64795540
chr2	116972330	116972331	chr17	41160511	41160512
chr2	173619756	173619757	chr17	2016383	2016384
chr2	183676962	183676963	chr17	76182052	76182053
chr2	223928281	223928282	chr17	52874116	52874117
chr2	33141521	33141522	chr18	74219022	74219023
chr2	33141647	33141648	chr18	9715123	9715124
chr2	39490719	39490720	chr18	73953925	73953926
chr2	74728168	74728169	chr18	108401	108402
chr2	113104234	113104235	chr18	28730010	28730011
chr2	114106437	114106438	chr18	66578699	66578700
chr2	41448919	41448920	chr18	43871958	43871959
chr2	98832278	98832279	chr18	58924314	58924315
chr2	125301036	125301037	chr18	13031184	13031185
chr2	5017260	5017261	chr19	4334807	4334808
chr2	33141576	33141577	chr19	49105077	49105078
chr2	33141576	33141577	chr19	50373032	50373033
chr2	33141594	33141595	chr19	1769223	1769224
chr2	33141594	33141595	chr19	45188210	45188211
chr2	56152736	56152737	chr19	5685363	5685364
chr2	107771263	107771264	chr19	27732005	27732006
chr2	133162398	133162399	chr19	33798561	33798562
chr2	179271443	179271444	chr19	15294196	15294197
chr2	201955112	201955113	chr19	41032336	41032337
chr2	222351168	222351169	chr19	50115208	50115209
chr2	241012400	241012401	chr19	58901844	58901845
chr2	11032718	11032719	chr19	41011660	41011661
chr2	33141576	33141577	chr19	52194340	52194341
chr2	115310414	115310415	chr19	17261384	17261385
chr2	117522347	117522348	chr19	40855623	40855624
chr2	145332143	145332144	chr19	11578679	11578680
chr2	171711167	171711168	chr19	30337279	30337280
chr2	222085398	222085399	chr19	15927952	15927953
chr2	33141552	33141553	chr20	62284888	62284889
chr2	33141576	33141577	chr20	61624713	61624714
chr2	33141594	33141595	chr20	22548659	22548660
chr2	33141594	33141595	chr20	31150817	31150818
chr2	33141647	33141648	chr20	6821877	6821878
chr2	34704417	34704418	chr20	728891	728892
chr2	33141576	33141577	chr20	36948820	36948821
chr2	45183104	45183105	chr20	6032743	6032744
chr2	89867488	89867489	chr20	29829697	29829698
chr2	182770011	182770012	chr20	45091669	45091670
chr2	232947336	232947337	chr20	60985103	60985104
chr2	12607607	12607608	chr21	27860560	27860561
chr2	33141576	33141577	chr21	33765321	33765322
chr2	33141576	33141577	chr21	42900659	42900660
chr2	38542123	38542124	chr21	37630439	37630440
chr2	73066202	73066203	chr21	42507855	42507856
chr2	129411353	129411354	chr21	35074427	35074428
chr2	4233846	4233847	chr21	11066806	11066807
chr2	27491339	27491340	chr21	44252215	44252216
chr2	50038117	50038118	chr21	23817349	23817350
chr2	58297282	58297283	chr21	9827520	9827521
chr2	89864676	89864677	chr21	10853761	10853762
chr2	89866385	89866386	chr21	10778920	10778921
chr2	163331584	163331585	chr21	39889447	39889448
chr2	180124181	180124182	chr21	35272951	35272952
chr2	33141594	33141595	chr22	49246121	49246122
chr2	64603099	64603100	chr22	45280283	45280284
chr2	81893241	81893242	chr22	40000621	40000622
chr2	33141637	33141638	chr22	17712323	17712324
chr2	91694630	91694631	chr22	17041904	17041905
chr2	127073328	127073329	chr22	44801720	44801721
chr2	135523152	135523153	chr22	18880065	18880066
chr2	36259943	36259944	chrX	3295641	3295642
chr2	66301307	66301308	chrX	150931989	150931990
chr2	72315156	72315157	chrX	2835788	2835789
chr2	100957214	100957215	chrX	91498737	91498738
chr2	123478413	123478414	chrX	66368088	66368089
chr2	178648956	178648957	chrX	18335671	18335672
chr2	223882877	223882878	chrX	33533116	33533117
chr2	228279347	228279348	chrX	24668751	24668752
chr2	33141576	33141577	chrX	129226075	129226076
chr2	88573799	88573800	chrX	20148284	20148285
chr2	113679123	113679124	chrX	92992214	92992215
chr2	213362739	213362740	chrX	134293931	134293932
chr2	229003631	229003632	chrX	100250331	100250332
chr2	230246984	230246985	chrX	84823534	84823535
chr2	76955547	76955548	chrY	13301859	13301860
chr2	89879704	89879705	chrY	13811068	13811069
chr2	178189399	178189400	chrY	13488852	13488853
chr2	221101285	221101286	chrY	13842751	13842752
chr2	26336379	26336380	chr3	102087355	102087356
chr2	27878917	27878918	chr3	172607771	172607772
chr2	33141413	33141414	chr3	32280149	32280150
chr2	33141413	33141414	chr3	48405871	48405872
chr2	33141413	33141414	chr3	142719011	142719012
chr2	37210007	37210008	chr3	160474541	160474542
chr2	48843746	48843747	chr3	119087194	119087195
chr2	53804037	53804038	chr3	65061946	65061947
chr2	61241271	61241272	chr3	156425070	156425071
chr2	61899716	61899717	chr3	61958515	61958516
chr2	67615872	67615873	chr3	53852248	53852249
chr2	70473560	70473561	chr3	122549646	122549647
chr2	74425459	74425460	chr3	100734409	100734410
chr2	75552263	75552264	chr3	74118886	74118887
chr2	113962797	113962798	chr3	57653559	57653560
chr2	139312702	139312703	chr3	192651883	192651884
chr2	182692142	182692143	chr3	12698224	12698225
chr2	193594102	193594103	chr3	59399275	59399276
chr2	214745058	214745059	chr3	94626529	94626530
chr2	226911060	226911061	chr3	125697810	125697811
chr2	236166234	236166235	chr3	14021264	14021265
chr2	4345013	4345014	chr3	14665704	14665705
chr2	16214763	16214764	chr3	46661852	46661853
chr2	33141413	33141414	chr3	18467000	18467001
chr2	33141413	33141414	chr3	50442815	50442816
chr2	33141413	33141414	chr3	137674907	137674908
chr2	39000066	39000067	chr3	122302367	122302368
chr2	53421473	53421474	chr3	68360061	68360062
chr2	62231516	62231517	chr3	187207379	187207380
chr2	64707159	64707160	chr3	5721333	5721334
chr2	95560271	95560272	chr3	47782873	47782874
chr2	97473962	97473963	chr3	122143822	122143823
chr2	150086298	150086299	chr3	151382542	151382543
chr2	165645530	165645531	chr3	196722108	196722109
chr2	209506155	209506156	chr3	94852429	94852430
chr2	227963785	227963786	chr3	108075043	108075044
chr2	236481631	236481632	chr3	112523227	112523228
chr2	24557644	24557645	chr4	181503034	181503035
chr2	29717710	29717711	chr4	116497732	116497733
chr2	33141413	33141414	chr4	99916762	99916763
chr2	33141413	33141414	chr4	124426797	124426798
chr2	33141413	33141414	chr4	160376902	160376903
chr2	48873085	48873086	chr4	126606542	126606543
chr2	68068836	68068837	chr4	38452263	38452264
chr2	78091920	78091921	chr4	174044215	174044216
chr2	100564042	100564043	chr4	13575116	13575117
chr2	128272653	128272654	chr4	74440817	74440818
chr2	160376317	160376318	chr4	88086025	88086026
chr2	238506688	238506689	chr4	21600181	21600182
chr2	33141413	33141414	chr4	1187483	1187484
chr2	59269377	59269378	chr4	70096940	70096941
chr2	89872702	89872703	chr4	49155299	49155300
chr2	89877873	89877874	chr4	49641212	49641213
chr2	131876216	131876217	chr4	87534570	87534571
chr2	151170036	151170037	chr4	108407410	108407411
chr2	173527222	173527223	chr4	104616901	104616902
chr2	181497228	181497229	chr4	77878135	77878136
chr2	224645075	224645076	chr4	41371976	41371977
chr2	21253530	21253531	chr5	66461809	66461810
chr2	33141413	33141414	chr5	1112462	1112463
chr2	33141413	33141414	chr5	157285878	157285879
chr2	75297348	75297349	chr5	98171088	98171089
chr2	78589339	78589340	chr5	40716412	40716413
chr2	84590140	84590141	chr5	91480781	91480782
chr2	106452574	106452575	chr5	98585422	98585423
chr2	149490644	149490645	chr5	27207191	27207192
chr2	156084366	156084367	chr5	117386615	117386616
chr2	210211044	210211045	chr5	157177696	157177697
chr2	26623669	26623670	chr5	179876398	179876399
chr2	33141413	33141414	chr5	37416686	37416687
chr2	33141413	33141414	chr5	60333908	60333909
chr2	38547939	38547940	chr5	149893836	149893837
chr2	84406350	84406351	chr5	60951852	60951853
chr2	102188244	102188245	chr5	170247847	170247848
chr2	106080822	106080823	chr5	61006743	61006744
chr2	112009061	112009062	chr5	170261105	170261106
chr2	171338435	171338436	chr5	18319721	18319722
chr2	216939217	216939218	chr5	54019069	54019070
chr2	33141413	33141414	chr6	86159339	86159340
chr2	36120037	36120038	chr6	54944187	54944188
chr2	42164653	42164654	chr6	97159023	97159024
chr2	45279774	45279775	chr6	79851008	79851009
chr2	98338156	98338157	chr6	2933780	2933781
chr2	105563633	105563634	chr6	148708687	148708688
chr2	110930225	110930226	chr6	147741060	147741061
chr2	111978079	111978080	chr6	33740322	33740323
chr2	163609413	163609414	chr6	65987956	65987957
chr2	203616216	203616217	chr6	72686745	72686746
chr2	230113055	230113056	chr6	166471116	166471117
chr2	240908853	240908854	chr6	162731450	162731451
chr2	7633587	7633588	chr6	159318025	159318026
chr2	33141312	33141313	chr6	44239101	44239102
chr2	33141413	33141414	chr6	6178292	6178293
chr2	33141413	33141414	chr6	40384187	40384188
chr2	33141413	33141414	chr6	43859337	43859338
chr2	33141413	33141414	chr6	169226008	169226009
chr2	42178658	42178659	chr6	158405525	158405526
chr2	113769191	113769192	chr6	160701291	160701292
chr2	162530399	162530400	chr6	128301535	128301536
chr2	204240877	204240878	chr6	71355528	71355529
chr2	220973308	220973309	chr6	150061657	150061658
chr2	225644003	225644004	chr6	34898723	34898724
chr2	241998785	241998786	chr6	170021098	170021099
chr2	10208747	10208748	chr7	113101961	113101962
chr2	11426361	11426362	chr7	7267070	7267071
chr2	33141413	33141414	chr7	101555506	101555507
chr2	45817671	45817672	chr7	127719108	127719109
chr2	69606773	69606774	chr7	142144752	142144753
chr2	82436492	82436493	chr7	47416324	47416325
chr2	92270324	92270325	chr7	61789408	61789409
chr2	106447127	106447128	chr7	28682569	28682570
chr2	107274683	107274684	chr7	158731420	158731421
chr2	163678623	163678624	chr7	127744950	127744951
chr2	195615375	195615376	chr7	61528711	61528712
chr2	234356146	234356147	chr7	142326197	142326198
chr2	236175110	236175111	chr7	126224474	126224475
chr2	241581317	241581318	chr7	105502213	105502214
chr2	11364471	11364472	chr7	2181538	2181539
chr2	16214764	16214765	chr7	53358289	53358290
chr2	33141312	33141313	chr7	75654498	75654499
chr2	33141413	33141414	chr7	36274330	36274331
[truncated: 13,823 more rows]
