# Supplementary material for: An AR-ERG transcriptional signature defined by long-range chromatin interactomes in prostate cancer cells
Source: HighWire-hosted journal article supplement (doi:10.1101/gr.230243.117), 2019-01-03
Supplement: Supplemental_Table_S5.xlsx [file Supplemental_Table_S5.xlsx]

## Sheet: Sheet1
Table.S5: Library Statistics of ERG ChIA-PET
ERG ChIA-PET	Count	Percentage
Inter-chromosome PETs	17220867	0.6038
Intra-chromosome PETs	2696370	0.0945
Self-ligation PETs	7452131	0.2613
Different orientation PETs	1150269	0.0403
Total PETS	28519637	1
