# Supplementary material for: An AR-ERG transcriptional signature defined by long-range chromatin interactomes in prostate cancer cells
Source: HighWire-hosted journal article supplement (doi:10.1101/gr.230243.117), 2019-01-03
Supplement: Supplemental_Table_S6.xlsx [file Supplemental_Table_S6.xlsx]

## Sheet: Sheet1
Table.S6: Statistics of Overlapping ERG ChIA-PET long range interactions with Structure Variation in VCaP cell line
ERG PET2+ Loopings	Count	Percentage
SV overlap	3906	0.0753095
non-SV Looping	47960	0.924691
Total	51866	1
