# Supplementary material for: An AR-ERG transcriptional signature defined by long-range chromatin interactomes in prostate cancer cells
Source: HighWire-hosted journal article supplement (doi:10.1101/gr.230243.117), 2019-01-03
Supplement: Supplemental_Table_S7.xlsx [file Supplemental_Table_S7.xlsx]

## Sheet: Sheet1
Table.S7: The coordinates of AR anchors overlapping with Co-TFs binding sites
Chromosome	AR_anchor_start	AR_anchor_end
Chr1	1772698	1773623	ERG,FOXA1
Chr1	1788522	1790646	BRD4,ERG,FOXA1,GABPA,HDAC2,HDAC3,POL2
Chr1	1975260	1975971	HDAC2
Chr1	2179665	2180523	BRD2,BRD3,BRD4,ERG,GABPA,POL2
Chr1	2187516	2188097	ERG,GABPA,HDAC3,POL2
Chr1	2342006	2342784	ERG,FOXA1,GABPA,HDAC2,HDAC3,POL2
Chr1	2711816	2712829	GABPA,POL2
Chr1	2884467	2885134	ERG,FOXA1,GABPA,HDAC2,HDAC3,POL2
Chr1	3135662	3136340	GABPA,HDAC2,POL2
Chr1	3188220	3189039	GABPA,POL2
Chr1	3250224	3251150	ERG,GABPA,HDAC2,POL2
Chr1	3251714	3252359	HDAC2
Chr1	3309222	3310370	ERG,GABPA,HDAC2,POL2
Chr1	3684349	3685043	POL2
Chr1	4656724	4657849	ERG,FOXA1,GABPA,HDAC2,HDAC3
Chr1	4674007	4675076	GABPA
Chr1	4708978	4709871	ERG,POL2
Chr1	4770700	4771282	ERG
Chr1	4789928	4790847	ERG,GABPA,HDAC2,HDAC3,POL2
Chr1	4813877	4814854	HDAC2
Chr1	5468906	5469958	GABPA
Chr1	5490694	5491645	FOXA1,HDAC2
Chr1	5507211	5508079	GABPA
Chr1	5553790	5555256	ERG,GABPA,HDAC2,HDAC3,POL2
Chr1	5611310	5612357	ERG,GABPA,POL2
Chr1	5646435	5647795	GABPA,HDAC2,POL2
Chr1	5657898	5658821	FOXA1,HDAC2,POL2
Chr1	5748226	5749115	BRD2,BRD3,BRD4,ERG,FOXA1,GABPA,HDAC2,POL2
Chr1	5786610	5787984	ERG,EZH2,FOXA1,GABPA,HDAC2,HDAC3,POL2
Chr1	6112653	6113295	HDAC2,POL2
Chr1	6217653	6218809	ERG,GABPA,HDAC2,POL2
Chr1	6319289	6320274	GABPA,HDAC2
Chr1	6403497	6404242	BRD2,BRD3,BRD4,ERG,GABPA,HDAC2,POL2
Chr1	7016189	7017195	POL2
Chr1	7018289	7019843	ERG,HDAC2,HDAC3,POL2
Chr1	7020240	7021757	GABPA,HDAC2,HDAC3
Chr1	7258803	7259568	BRD3,FOXA1,HDAC2,POL2
Chr1	7708662	7709665	ERG,GABPA,HDAC2,HDAC3,POL2
Chr1	7805255	7806579	ERG,GABPA
Chr1	7866783	7867905	ERG,FOXA1,HDAC2,HDAC3
Chr1	7950607	7951396	GABPA,POL2
Chr1	8030733	8032182	ERG,FOXA1,GABPA,HDAC2,HDAC3,POL2
Chr1	8035314	8036831	BRD2,GABPA
Chr1	8064710	8065814	GABPA,HDAC2,POL2
Chr1	8130209	8131783	ERG,EZH2,HDAC2,HDAC3,POL2
Chr1	8143837	8144941	HDAC2,HDAC3
Chr1	8229377	8230416	BRD3,BRD4,ERG,GABPA,HDAC2,POL2
Chr1	8241933	8243412	ERG,HDAC2,HDAC3,POL2
Chr1	8249593	8250800	GABPA,HDAC2,HDAC3
Chr1	8301171	8302566	BRD3,BRD4,ERG,GABPA,HDAC2,HDAC3,POL2
Chr1	8318493	8320609	BRD3,ERG,EZH2,FOXA1,GABPA,HDAC2,HDAC3,POL2
Chr1	8326278	8327567	ERG,POL2
Chr1	8359609	8361087	ERG,GABPA,HDAC2,HDAC3,POL2
Chr1	8371629	8374570	BRD2,BRD3,ERG,GABPA,HDAC2,HDAC3,POL2
Chr1	8402925	8404513	BRD2,BRD3,BRD4
Chr1	8424187	8425106	ERG,GABPA,HDAC2,HDAC3
Chr1	8472096	8473338	ERG,EZH2,FOXA1,GABPA,HDAC2,HDAC3,POL2
Chr1	8484273	8485463	BRD4,ERG,GABPA,HDAC2,HDAC3,POL2
Chr1	8508011	8510100	BRD4,ERG,POL2
Chr1	8522907	8523764	BRD3,ERG,GABPA
Chr1	8671906	8672730	HDAC2
Chr1	8689997	8690860	ERG,HDAC2,POL2
Chr1	8703899	8704842	GABPA,HDAC2
Chr1	9061728	9063065	BRD2,BRD3,BRD4,ERG,FOXA1,HDAC2,POL2
Chr1	9083887	9084879	HDAC2
Chr1	9086758	9088076	ERG,GABPA,HDAC2,POL2
Chr1	9129935	9131252	HDAC2
Chr1	9134881	9135710	ERG,GABPA,HDAC3,POL2
Chr1	9135999	9137000	ERG,HDAC2
Chr1	9444755	9445514	GABPA,HDAC2,HDAC3,POL2
Chr1	9495924	9496998	ERG,EZH2,FOXA1,GABPA,HDAC2,HDAC3,POL2
Chr1	9497613	9498632	HDAC2
Chr1	9542514	9543832	GABPA
Chr1	9590821	9591739	HDAC2,POL2
Chr1	9602078	9603266	ERG,GABPA
Chr1	9613410	9614419	ERG,EZH2,FOXA1,GABPA,HDAC2,HDAC3,POL2
Chr1	9619320	9620435	ERG
Chr1	9903342	9903875	BRD2,BRD3,BRD4,ERG,FOXA1,GABPA,HDAC2,HDAC3,POL2
Chr1	10359165	10360246	POL2
Chr1	10498550	10499204	GABPA,HDAC3,POL2
Chr1	10575938	10577353	BRD3,HDAC2,HDAC3,POL2
Chr1	10582934	10583625	HDAC2
Chr1	10696208	10697437	BRD3,BRD4,ERG,GABPA,HDAC2,POL2
Chr1	10783879	10784782	FOXA1,HDAC2,POL2
Chr1	11175431	11176064	BRD4,GABPA,HDAC2
Chr1	11193478	11195083	BRD3,GABPA,HDAC2
Chr1	11211938	11213275	POL2
Chr1	11218803	11219714	GABPA
Chr1	11307222	11308139	GABPA,POL2
Chr1	11315999	11316949	POL2
Chr1	11463835	11465056	ERG,GABPA,HDAC2,HDAC3,POL2
Chr1	11515514	11516425	BRD3
Chr1	11606364	11607620	POL2
Chr1	11629003	11630450	ERG,EZH2,GABPA,HDAC2,HDAC3,POL2
Chr1	11797295	11797924	HDAC2,POL2
Chr1	11872524	11873321	HDAC2,POL2
Chr1	12100439	12100976	GABPA,POL2
Chr1	12109628	12110352	FOXA1,GABPA
Chr1	12243927	12244816	GABPA,HDAC2
Chr1	12338089	12339001	GABPA
Chr1	12392775	12394099	ERG,GABPA,POL2
Chr1	12428505	12429513	GABPA,POL2
Chr1	12467083	12468327	ERG,FOXA1,HDAC3,POL2
Chr1	12535325	12537167	ERG,FOXA1,GABPA,HDAC2,HDAC3,POL2
Chr1	12538236	12539009	ERG,HDAC2,POL2
Chr1	12543300	12546365	BRD4,HDAC2,POL2
Chr1	12555396	12558115	BRD4,ERG,FOXA1,GABPA,HDAC2,HDAC3,POL2
Chr1	12587915	12589089	ERG
Chr1	12664041	12665038	ERG,FOXA1,GABPA,HDAC2,HDAC3,POL2
Chr1	13946369	13947011	POL2
Chr1	13991611	13992910	GABPA
Chr1	14041518	14042417	ERG
Chr1	14468613	14469802	POL2
Chr1	14605514	14606638	POL2
Chr1	14825046	14825968	ERG,FOXA1,GABPA,HDAC2,HDAC3,POL2
Chr1	14951750	14952897	ERG,GABPA,POL2
Chr1	14974388	14975855	HDAC2,HDAC3
Chr1	15064473	15065356	ERG,FOXA1,GABPA,HDAC2,HDAC3,POL2
Chr1	15284198	15285453	ERG,GABPA,HDAC2,HDAC3,POL2
Chr1	16574688	16576008	ERG,GABPA,HDAC2,POL2
Chr1	16930637	16931387	ERG,FOXA1,HDAC2,HDAC3
Chr1	16934371	16935862	BRD4,FOXA1,GABPA,HDAC2,POL2
Chr1	18218406	18219148	HDAC2,HDAC3,POL2
Chr1	18367354	18368198	ERG,GABPA,HDAC2,POL2
Chr1	18385529	18386134	FOXA1,GABPA,POL2
Chr1	18479777	18480465	ERG,GABPA
Chr1	18516862	18517451	HDAC2,POL2
Chr1	18528183	18528994	ERG,FOXA1
Chr1	18624889	18626174	ERG,GABPA,HDAC2,POL2
Chr1	18743638	18744407	POL2
Chr1	18766677	18767742	FOXA1,GABPA,HDAC3,POL2
Chr1	18790492	18791882	BRD4,ERG,FOXA1,GABPA,HDAC2,POL2
Chr1	19046518	19047180	ERG
Chr1	19052516	19053571	BRD3
Chr1	19229543	19230482	ERG,GABPA,POL2
Chr1	19270995	19272081	GABPA,HDAC2
Chr1	19275324	19276104	FOXA1,HDAC2
Chr1	19315041	19316355	ERG,EZH2,FOXA1,GABPA,HDAC2,HDAC3,POL2
Chr1	19391775	19394147	BRD3,ERG,EZH2,HDAC2,HDAC3,POL2
Chr1	19401182	19402545	POL2
Chr1	19406065	19407408	ERG,GABPA,HDAC2,HDAC3,POL2
Chr1	19751012	19752020	GABPA,HDAC2
Chr1	19752812	19754622	FOXA1,GABPA,HDAC2,HDAC3,POL2
Chr1	19763021	19764544	ERG
Chr1	19771853	19772843	ERG,GABPA,HDAC2
Chr1	19785255	19786247	GABPA,POL2
Chr1	19830878	19832330	FOXA1,HDAC3,POL2
Chr1	19840609	19841833	FOXA1,GABPA,HDAC3,POL2
Chr1	19874078	19874981	ERG,POL2
Chr1	19939305	19940826	ERG,GABPA,HDAC2,HDAC3
Chr1	19941145	19942339	HDAC2
Chr1	19946050	19947034	HDAC2,HDAC3
Chr1	20102544	20103496	BRD4,ERG,FOXA1,GABPA,POL2
Chr1	20124709	20125333	POL2
Chr1	20139037	20139893	ERG,GABPA,HDAC2,HDAC3,POL2
Chr1	20358703	20359912	ERG,EZH2,FOXA1,GABPA,HDAC2,POL2
Chr1	20647695	20648779	ERG,GABPA,POL2
Chr1	20667114	20668745	HDAC2
Chr1	20682602	20684671	POL2
Chr1	20686254	20686862	GABPA,HDAC2
Chr1	20864566	20865581	ERG,FOXA1,HDAC2,HDAC3,POL2
Chr1	21578129	21579080	FOXA1,GABPA,POL2
Chr1	21594239	21595277	GABPA,HDAC2,POL2
Chr1	21602379	21603565	ERG,GABPA,HDAC2,HDAC3,POL2
Chr1	21658598	21659326	EZH2,HDAC2,HDAC3,POL2
Chr1	21664505	21665257	FOXA1,HDAC2,POL2
Chr1	21899770	21901675	BRD3,BRD4,ERG,GABPA,HDAC2,HDAC3,POL2
Chr1	21949717	21950709	BRD2,ERG,GABPA,HDAC2,HDAC3,POL2
Chr1	21951688	21953047	ERG,FOXA1,GABPA,HDAC2,HDAC3,POL2
Chr1	22016357	22017066	FOXA1,HDAC2,POL2
Chr1	22087243	22088232	HDAC3,POL2
Chr1	22102231	22103664	POL2
Chr1	22270320	22271475	GABPA
Chr1	22283143	22284641	BRD2,BRD3,BRD4,ERG,GABPA,HDAC2,HDAC3,POL2
Chr1	22674575	22675905	ERG,FOXA1,GABPA,HDAC2,POL2
Chr1	22825634	22826798	ERG,HDAC2
Chr1	23007275	23008053	FOXA1
Chr1	23043473	23044742	ERG,FOXA1,GABPA,HDAC2,POL2
Chr1	23152958	23154097	ERG,GABPA,HDAC3,POL2
Chr1	23196871	23197791	BRD2,BRD3,BRD4,ERG,GABPA,HDAC2,POL2
Chr1	23295458	23296346	ERG,GABPA,HDAC2,HDAC3
Chr1	23409915	23410865	ERG,GABPA
Chr1	23411605	23412539	ERG,GABPA
Chr1	23629657	23630699	ERG,HDAC2,HDAC3,POL2
Chr1	23776268	23776975	HDAC2
Chr1	23965201	23965988	ERG,FOXA1,POL2
Chr1	24053737	24054681	ERG,FOXA1,GABPA,HDAC2,POL2
Chr1	24111044	24111972	ERG,GABPA,HDAC3,POL2
Chr1	24455471	24456534	ERG,FOXA1,GABPA,HDAC2,HDAC3,POL2
Chr1	24528105	24528943	ERG,GABPA
Chr1	24532606	24533699	GABPA
Chr1	24610166	24610893	ERG,GABPA,POL2
Chr1	24669655	24670952	ERG,GABPA,HDAC2,POL2
Chr1	24711028	24712142	FOXA1,POL2
Chr1	25179643	25181018	ERG,GABPA,HDAC2,HDAC3,POL2
Chr1	25219673	25220737	ERG,FOXA1,HDAC2,POL2
Chr1	25338455	25339145	ERG,GABPA,POL2
Chr1	25358243	25359352	ERG,GABPA,POL2
Chr1	25407430	25408161	POL2
Chr1	25468001	25468799	HDAC2
Chr1	25578959	25579681	POL2
Chr1	25758305	25758834	HDAC2
Chr1	25785190	25786056	BRD4,GABPA,HDAC2,HDAC3,POL2
Chr1	25827367	25828155	FOXA1,GABPA,HDAC2,HDAC3,POL2
Chr1	26105679	26106453	GABPA,HDAC2
Chr1	26108974	26110371	BRD4,ERG,GABPA,POL2
Chr1	26122592	26123675	BRD3,ERG,GABPA,POL2
Chr1	26193795	26194595	ERG,POL2
Chr1	26215962	26216935	BRD3,ERG,GABPA,HDAC2,POL2
Chr1	26217091	26218000	ERG,GABPA,HDAC2
Chr1	26393140	26394313	ERG,FOXA1,GABPA,HDAC2
Chr1	26398937	26400013	ERG,FOXA1,GABPA,POL2
Chr1	26405827	26407471	ERG,FOXA1,GABPA,POL2
Chr1	26420921	26421897	ERG,GABPA,HDAC3,POL2
Chr1	26423441	26425000	ERG,HDAC2,HDAC3
Chr1	26947038	26947667	BRD2,BRD3,BRD4,ERG,GABPA,HDAC2,POL2
Chr1	27057765	27058559	FOXA1
Chr1	27125701	27127285	ERG,FOXA1,GABPA,HDAC2,HDAC3,POL2
Chr1	27692701	27693603	ERG,GABPA,HDAC2,POL2
Chr1	27757429	27757993	GABPA
Chr1	27823657	27824554	ERG
Chr1	27848428	27849363	BRD4,GABPA
Chr1	27854829	27855493	BRD2,BRD3,BRD4,HDAC2,POL2
Chr1	28417337	28418341	ERG,GABPA,HDAC3,POL2
Chr1	28498977	28499965	ERG,POL2
Chr1	28535972	28536896	ERG,GABPA
Chr1	28764101	28765386	ERG,GABPA,HDAC2,HDAC3,POL2
Chr1	29681032	29682252	GABPA
Chr1	29853419	29854506	HDAC2
Chr1	30155045	30156487	BRD2,ERG,FOXA1,GABPA,HDAC2,HDAC3,POL2
Chr1	30178184	30180074	ERG,GABPA,HDAC2,HDAC3,POL2
Chr1	30561409	30562967	ERG,HDAC2,HDAC3,POL2
Chr1	30582840	30584681	BRD4,HDAC2,HDAC3,POL2
Chr1	30722948	30724265	ERG,GABPA,POL2
Chr1	31137077	31137772	HDAC2,POL2
Chr1	31280100	31281037	HDAC2
Chr1	31296584	31297849	BRD2,BRD3,BRD4,GABPA,POL2
Chr1	31730947	31731891	ERG,GABPA,HDAC2,HDAC3,POL2
Chr1	32308139	32309147	POL2
Chr1	32363284	32363788	ERG,FOXA1,GABPA,HDAC2,HDAC3,POL2
Chr1	32689549	32690158	FOXA1
Chr1	32871469	32872736	GABPA,POL2
Chr1	32940273	32941384	ERG,GABPA,POL2
Chr1	32961545	32962663	ERG,GABPA,POL2
Chr1	32967016	32968574	ERG,EZH2,FOXA1,GABPA,HDAC2,HDAC3,POL2
Chr1	33146719	33147676	GABPA
Chr1	33232679	33233816	GABPA,HDAC2,HDAC3,POL2
Chr1	33476305	33477101	BRD3,GABPA,HDAC2,POL2
Chr1	33618405	33619256	GABPA
Chr1	33705675	33706776	GABPA
Chr1	33842241	33843202	ERG,FOXA1,GABPA,HDAC2,POL2
Chr1	33879422	33880489	HDAC2
Chr1	33947547	33948329	POL2
Chr1	34124753	34126623	ERG,FOXA1,GABPA,HDAC2,HDAC3,POL2
Chr1	34211858	34214160	GABPA,HDAC2,HDAC3,POL2
Chr1	34223531	34225375	GABPA,HDAC2,POL2
Chr1	34309570	34310460	FOXA1,GABPA,POL2
Chr1	34379921	34381403	ERG,FOXA1,GABPA,HDAC2,POL2
Chr1	34438727	34439316	ERG,GABPA
Chr1	34479674	34481083	ERG,GABPA,HDAC2,HDAC3,POL2
Chr1	34517799	34518867	POL2
Chr1	34866350	34866948	HDAC2
Chr1	34871532	34872455	ERG
Chr1	35315939	35316529	BRD4,POL2
Chr1	35908034	35908877	ERG
Chr1	36019106	36020388	ERG,HDAC2
Chr1	36021654	36022624	BRD3,BRD4,ERG,GABPA,HDAC2,POL2
Chr1	36366889	36367394	GABPA,HDAC2,POL2
Chr1	36397027	36397835	BRD2,BRD3,BRD4,ERG,HDAC2
Chr1	36626809	36627795	BRD2,BRD4,ERG,GABPA,POL2
Chr1	36665095	36666455	EZH2,GABPA,HDAC2,HDAC3,POL2
Chr1	36697754	36698819	POL2
Chr1	36704969	36706281	GABPA,POL2
Chr1	36734538	36735646	ERG,FOXA1,HDAC2,POL2
Chr1	36762249	36763331	EZH2,POL2
Chr1	37107040	37107718	GABPA,HDAC2
Chr1	37536192	37536760	BRD2,BRD3,BRD4
Chr1	37584683	37586012	HDAC2
Chr1	37914448	37915209	HDAC2
Chr1	37926800	37927934	GABPA,POL2
Chr1	37949766	37950838	ERG,GABPA,HDAC2,HDAC3,POL2
Chr1	37961195	37961975	FOXA1
Chr1	37963041	37965657	BRD3,ERG,FOXA1,GABPA,HDAC2,HDAC3,POL2
Chr1	37999719	38000826	POL2
Chr1	38607887	38609013	ERG,FOXA1,GABPA,HDAC2,HDAC3,POL2
Chr1	38659946	38661085	ERG,HDAC2,HDAC3,POL2
Chr1	39531027	39531950	ERG,FOXA1,HDAC2,POL2
Chr1	39582430	39583409	FOXA1,POL2
Chr1	39594110	39595175	ERG,GABPA,POL2
Chr1	39813666	39814524	FOXA1,POL2
Chr1	40010105	40010641	ERG,FOXA1,GABPA,HDAC2,HDAC3,POL2
Chr1	40118759	40119572	GABPA,HDAC2
Chr1	40166205	40167437	BRD2,BRD4,ERG,GABPA,HDAC2,POL2
Chr1	40300382	40301447	ERG,GABPA,HDAC3,POL2
Chr1	40325291	40326146	ERG,FOXA1,GABPA
Chr1	40342258	40343776	ERG,GABPA,POL2
Chr1	40391784	40393621	GABPA
Chr1	40495657	40497257	HDAC2,HDAC3,POL2
Chr1	40747307	40748659	ERG,GABPA,POL2
Chr1	40767131	40768333	ERG,HDAC2,HDAC3,POL2
Chr1	41328257	41329007	GABPA,HDAC2
Chr1	41703545	41704449	ERG
Chr1	41875388	41876217	ERG,GABPA
Chr1	41897719	41898592	BRD2,BRD3,BRD4,ERG,GABPA,HDAC2
Chr1	42347056	42347791	ERG,GABPA
Chr1	42612304	42613281	ERG,FOXA1,GABPA
Chr1	42645662	42646494	GABPA
Chr1	42805502	42807014	FOXA1,GABPA,POL2
Chr1	43306396	43306993	GABPA
Chr1	43504439	43505994	ERG,FOXA1,GABPA,POL2
Chr1	43700659	43701705	BRD3,BRD4,GABPA,HDAC2,POL2
Chr1	43706714	43707606	GABPA,HDAC2
Chr1	43861271	43862387	GABPA,POL2
Chr1	44206880	44207565	GABPA
Chr1	44223150	44224097	POL2
Chr1	44257755	44259374	ERG,GABPA,HDAC2
Chr1	44378658	44379475	POL2
Chr1	45911557	45912409	HDAC2
Chr1	46330044	46330830	HDAC2
Chr1	46505188	46505880	ERG,GABPA,HDAC2,HDAC3,POL2
Chr1	47108623	47109690	HDAC2,POL2
Chr1	47147028	47148297	ERG,GABPA,HDAC2,HDAC3,POL2
Chr1	47496449	47497364	ERG,FOXA1,GABPA
Chr1	47813694	47814446	GABPA
Chr1	48012113	48013213	HDAC2,POL2
Chr1	48237080	48238122	BRD4
Chr1	48340418	48342051	GABPA,HDAC2,POL2
Chr1	48428991	48430390	GABPA,HDAC2,HDAC3,POL2
Chr1	48716557	48717482	ERG,FOXA1,HDAC2
Chr1	48918176	48919196	HDAC2,HDAC3,POL2
Chr1	48935187	48935945	ERG,GABPA,POL2
Chr1	49142234	49143108	ERG
Chr1	49403701	49405731	EZH2,GABPA,HDAC2,HDAC3
Chr1	49439054	49440470	HDAC2
Chr1	49443774	49444983	ERG,GABPA,POL2
Chr1	49490243	49491818	ERG
Chr1	49811883	49813159	ERG,FOXA1,HDAC2,HDAC3,POL2
Chr1	49929337	49931477	ERG,GABPA,HDAC2
Chr1	50159906	50160956	HDAC2
Chr1	50588359	50589695	FOXA1
Chr1	51098787	51100151	ERG
Chr1	51132217	51133169	POL2
Chr1	51416295	51416906	ERG,GABPA,HDAC3,POL2
Chr1	52017177	52018163	ERG,FOXA1,GABPA,POL2
Chr1	52025149	52026237	ERG,HDAC3,POL2
Chr1	52032906	52034035	ERG,POL2
Chr1	52413793	52415050	ERG,FOXA1,GABPA,HDAC2,POL2
Chr1	52537100	52537648	POL2
Chr1	52645465	52646082	HDAC2
Chr1	52657525	52658685	POL2
Chr1	52772275	52772898	BRD2,BRD3,BRD4
Chr1	53128078	53129088	ERG,GABPA,HDAC2,HDAC3,POL2
Chr1	53433149	53433934	GABPA
Chr1	53572935	53573951	ERG,FOXA1,GABPA,HDAC2,HDAC3,POL2
Chr1	53637264	53638186	HDAC2
Chr1	53642254	53642896	HDAC2,POL2
Chr1	54128476	54130044	GABPA,HDAC2,POL2
Chr1	54171893	54173043	ERG,GABPA,HDAC2,POL2
Chr1	54261554	54262686	POL2
Chr1	54364614	54365481	GABPA,HDAC2,HDAC3,POL2
Chr1	54553891	54554418	GABPA
Chr1	54731676	54732585	FOXA1
Chr1	54743871	54744753	ERG,GABPA,POL2
Chr1	54850767	54851473	GABPA,HDAC3
Chr1	55353730	55354891	HDAC2,POL2
Chr1	55369887	55371126	ERG,GABPA,HDAC2,HDAC3,POL2
Chr1	55392873	55393842	GABPA
Chr1	55443389	55444194	GABPA
Chr1	55452800	55453849	ERG,GABPA,HDAC2,POL2
Chr1	55822011	55822997	GABPA,POL2
Chr1	56058734	56059816	FOXA1,HDAC2,HDAC3,POL2
Chr1	56148922	56150320	ERG,FOXA1,POL2
Chr1	56159900	56160717	GABPA,HDAC2,POL2
Chr1	56384033	56385191	HDAC3
Chr1	56385394	56386308	BRD4,HDAC3
Chr1	56501050	56502729	HDAC2,POL2
Chr1	56566310	56568553	ERG
Chr1	56688647	56689595	GABPA
Chr1	56838007	56838983	ERG,POL2
Chr1	56863346	56864190	POL2
Chr1	57038633	57039966	HDAC2
Chr1	57076616	57077363	POL2
Chr1	57104796	57105675	FOXA1,GABPA
Chr1	57253386	57254945	BRD3,BRD4,ERG,FOXA1,GABPA,HDAC2,HDAC3,POL2
Chr1	57277889	57279587	GABPA,POL2
Chr1	57766363	57767655	ERG,EZH2,GABPA,HDAC2,HDAC3,POL2
Chr1	57873407	57874326	POL2
Chr1	57926456	57927662	ERG
Chr1	57930124	57931024	ERG,FOXA1
Chr1	57977755	57978844	POL2
Chr1	58537779	58538783	ERG,HDAC3
Chr1	58584366	58585736	HDAC2,POL2
Chr1	58609779	58611344	GABPA,POL2
Chr1	58618390	58619629	HDAC3,POL2
Chr1	58647873	58650352	ERG,FOXA1,GABPA,HDAC2,HDAC3,POL2
Chr1	58653991	58655210	ERG,GABPA,HDAC2
Chr1	58760088	58761164	ERG,HDAC2,POL2
Chr1	58769416	58770993	HDAC2
Chr1	59012560	59013270	BRD2,ERG,GABPA,POL2
Chr1	59218655	59219478	POL2
Chr1	59245466	59246071	POL2
Chr1	59246860	59247770	HDAC2
Chr1	59250850	59251369	BRD4,ERG,GABPA,HDAC2
Chr1	59387599	59389203	GABPA,POL2
Chr1	59408050	59409328	HDAC2,POL2
Chr1	59441739	59442664	ERG
Chr1	59447907	59448948	ERG,GABPA,HDAC2,HDAC3,POL2
Chr1	59526933	59528295	GABPA,POL2
Chr1	59536560	59537745	BRD4,ERG,FOXA1,GABPA,HDAC2,POL2
Chr1	59569716	59570702	POL2
Chr1	59581050	59582135	FOXA1
Chr1	59707856	59709296	HDAC3
Chr1	59917519	59918126	ERG
Chr1	60061077	60062309	EZH2,FOXA1,HDAC2,HDAC3,POL2
Chr1	60096777	60097934	HDAC2,POL2
Chr1	60151517	60152623	HDAC2,POL2
Chr1	60161398	60162499	HDAC2
Chr1	60195142	60196079	ERG
Chr1	60207987	60209888	HDAC2
Chr1	60322281	60323916	ERG,GABPA,HDAC3
Chr1	60406988	60407784	POL2
Chr1	60438170	60439450	HDAC2,POL2
Chr1	60499583	60500863	ERG,POL2
Chr1	60554107	60555368	FOXA1,GABPA,HDAC2,POL2
Chr1	60559182	60561028	ERG,FOXA1,GABPA,HDAC2
Chr1	60563067	60564298	BRD2,GABPA
Chr1	60573682	60574617	GABPA
Chr1	60576014	60577002	ERG
Chr1	60740018	60741103	ERG,FOXA1,HDAC2,HDAC3,POL2
Chr1	60893468	60894491	HDAC2,POL2
Chr1	60955006	60955822	BRD2,BRD4,GABPA,POL2
Chr1	61013399	61014165	POL2
Chr1	61038418	61039587	ERG,FOXA1,GABPA,HDAC2
Chr1	61085346	61086377	ERG,GABPA,POL2
Chr1	61102394	61103319	HDAC2
Chr1	61547310	61548344	ERG,HDAC2
Chr1	61598336	61599615	ERG,FOXA1,HDAC2,HDAC3
Chr1	61608330	61609975	FOXA1,GABPA,POL2
Chr1	61648852	61650622	BRD4,ERG,FOXA1,GABPA,HDAC2,HDAC3,POL2
Chr1	61818654	61820130	GABPA,HDAC2,HDAC3
Chr1	61857268	61858109	ERG
Chr1	62033888	62035148	ERG,FOXA1,HDAC2,HDAC3
Chr1	62103738	62107243	ERG,GABPA,HDAC2,HDAC3,POL2
Chr1	62108126	62109107	ERG,FOXA1
Chr1	62165683	62166906	GABPA
Chr1	63059414	63060313	ERG
Chr1	63066098	63067429	HDAC2
Chr1	63172708	63173788	ERG,GABPA,HDAC2,POL2
Chr1	63369875	63370594	ERG
Chr1	63945586	63946586	HDAC2,HDAC3,POL2
Chr1	63952926	63954434	HDAC2,POL2
Chr1	64139778	64140759	GABPA,POL2
Chr1	64166597	64167803	ERG,GABPA,HDAC2
Chr1	64253290	64254254	ERG,HDAC3,POL2
Chr1	64254449	64255410	GABPA
Chr1	64358194	64359532	ERG,GABPA
Chr1	64377539	64379221	ERG,EZH2,GABPA,HDAC2,HDAC3
Chr1	64393994	64396124	ERG,GABPA,HDAC2,HDAC3,POL2
Chr1	64440884	64441845	ERG,GABPA
Chr1	64448716	64450163	ERG,GABPA,HDAC2,HDAC3,POL2
Chr1	64471988	64473337	ERG,FOXA1,GABPA,HDAC2,POL2
Chr1	64507919	64509014	POL2
Chr1	64575283	64576230	GABPA
Chr1	64605400	64606137	ERG,GABPA
Chr1	64637842	64638825	ERG,FOXA1,HDAC2,HDAC3
Chr1	64710753	64711663	BRD4,ERG,GABPA,POL2
Chr1	64806036	64807084	HDAC3,POL2
Chr1	64808885	64809698	ERG,FOXA1,POL2
Chr1	64939716	64941003	ERG,GABPA,HDAC2,HDAC3,POL2
Chr1	64942086	64943240	ERG,FOXA1
Chr1	64960924	64962423	HDAC2,HDAC3,POL2
Chr1	65001404	65003668	BRD4,ERG,FOXA1,GABPA,HDAC2,HDAC3,POL2
Chr1	65014752	65016281	ERG
Chr1	65029227	65031084	HDAC2
Chr1	65061329	65062521	ERG,FOXA1,HDAC2,HDAC3,POL2
Chr1	65337832	65339217	HDAC2
Chr1	65416184	65417236	HDAC3,POL2
Chr1	65420338	65421872	ERG,GABPA,HDAC2,HDAC3,POL2
Chr1	65615844	65616676	ERG,GABPA,HDAC3
Chr1	65949597	65950960	HDAC3
Chr1	65958713	65960386	ERG,FOXA1,GABPA,HDAC2,HDAC3,POL2
Chr1	65990250	65991088	BRD2,BRD3,BRD4,ERG,POL2
Chr1	66023068	66024593	ERG,POL2
Chr1	66049937	66050653	HDAC2
Chr1	66052938	66053592	ERG
Chr1	66220064	66220950	FOXA1,POL2
Chr1	66223433	66224699	FOXA1,GABPA,HDAC2,HDAC3,POL2
Chr1	66229454	66230429	ERG,POL2
Chr1	66337772	66338772	ERG,FOXA1,GABPA,HDAC3,POL2
Chr1	66378463	66379893	HDAC2
Chr1	66386809	66388006	POL2
Chr1	66420412	66421449	GABPA
Chr1	66577919	66579454	EZH2,HDAC2
Chr1	66579469	66579997	HDAC2
Chr1	66743325	66745014	ERG,HDAC2
Chr1	66745054	66746026	ERG
Chr1	66746578	66749192	ERG,GABPA,POL2
Chr1	66756819	66757541	ERG,HDAC3
Chr1	66781854	66782961	ERG,HDAC2,POL2
Chr1	66796912	66797963	ERG,GABPA
Chr1	66798768	66799621	ERG
Chr1	66916938	66918394	ERG,FOXA1,GABPA,HDAC2,HDAC3,POL2
Chr1	67057786	67058826	BRD4
Chr1	67162355	67163348	POL2
Chr1	67170371	67171533	ERG,GABPA,HDAC2
Chr1	67332941	67333909	POL2
Chr1	68037954	68039007	BRD3,GABPA,HDAC2,HDAC3,POL2
Chr1	68053773	68054654	HDAC2
Chr1	68100663	68101911	BRD2,BRD3,BRD4,GABPA
Chr1	68225740	68226971	HDAC3
Chr1	68345401	68346216	ERG,FOXA1,GABPA,HDAC2,HDAC3,POL2
Chr1	68766847	68767895	ERG,POL2
Chr1	68772491	68774373	ERG,GABPA,HDAC2,HDAC3,POL2
Chr1	68792893	68793955	ERG,POL2
Chr1	68962193	68963191	BRD2,BRD3,BRD4,HDAC1,HDAC2
Chr1	69009841	69011053	ERG
Chr1	69524670	69525580	ERG
Chr1	69525664	69527222	FOXA1
Chr1	69553740	69554893	ERG,EZH2,FOXA1,GABPA,HDAC2,HDAC3,POL2
Chr1	69575206	69576468	ERG,FOXA1,GABPA,HDAC2,POL2
Chr1	69676897	69678159	ERG
Chr1	70797385	70798380	HDAC2
Chr1	71076192	71076792	ERG,POL2
Chr1	71356262	71356783	ERG,HDAC2
Chr1	72507709	72508710	ERG,GABPA
Chr1	73220331	73221045	ERG
Chr1	73324183	73325346	FOXA1,POL2
Chr1	73531064	73531742	FOXA1,HDAC2,POL2
Chr1	73572325	73573218	ERG,HDAC2,POL2
Chr1	73669090	73669726	POL2
Chr1	75117952	75119087	BRD4,ERG,FOXA1,GABPA,HDAC2,POL2
Chr1	75163323	75164077	ERG,GABPA,HDAC2
Chr1	75957770	75958933	ERG,FOXA1
Chr1	76024453	76025417	ERG
Chr1	76054126	76055008	ERG,FOXA1
Chr1	76198968	76200425	GABPA
Chr1	76534121	76535402	HDAC2,HDAC3,POL2
Chr1	76552102	76552879	POL2
Chr1	76837244	76838053	GABPA
Chr1	76872453	76873745	ERG
Chr1	76899574	76900371	POL2
Chr1	76943576	76944910	ERG,GABPA
Chr1	77217938	77218879	HDAC2
Chr1	77321059	77322838	ERG,EZH2,GABPA,HDAC2,HDAC3,POL2
Chr1	77508153	77509286	ERG,GABPA,HDAC2,HDAC3,POL2
Chr1	77645061	77645970	ERG,GABPA,POL2
Chr1	77808263	77809190	ERG,HDAC2,POL2
Chr1	77974482	77975707	GABPA,HDAC2
Chr1	78003900	78005321	FOXA1,GABPA,HDAC2
Chr1	78139582	78140827	HDAC2
Chr1	78261941	78263039	ERG,GABPA,POL2
Chr1	78463675	78464478	ERG,HDAC3,POL2
Chr1	78611438	78612788	HDAC2,HDAC3
Chr1	78697448	78698292	FOXA1
Chr1	78838842	78841147	ERG,FOXA1,HDAC2,HDAC3,POL2
Chr1	78844682	78845436	ERG,GABPA
Chr1	78966531	78967690	FOXA1,HDAC2,HDAC3,POL2
Chr1	79014799	79015951	POL2
Chr1	79211113	79211616	ERG,POL2
Chr1	79298895	79299479	ERG
Chr1	79321462	79323337	ERG,FOXA1,POL2
Chr1	79332282	79333172	GABPA
Chr1	79441225	79442426	GABPA
Chr1	79449053	79450118	FOXA1
Chr1	79483925	79485212	GABPA
Chr1	79614394	79615889	ERG,HDAC3
Chr1	79616348	79617860	ERG,FOXA1,GABPA,POL2
Chr1	79756322	79757635	ERG,EZH2,GABPA,HDAC2,HDAC3,POL2
Chr1	79812243	79812992	ERG
Chr1	79829090	79829959	FOXA1
Chr1	79982800	79983750	BRD2,BRD3,HDAC2,HDAC3,POL2
Chr1	80325017	80325833	ERG,GABPA,POL2
Chr1	81233558	81234906	EZH2,HDAC3
Chr1	81241808	81242994	ERG
Chr1	81277468	81278286	POL2
Chr1	81814452	81815472	GABPA,HDAC2
Chr1	81873027	81873969	ERG,GABPA
Chr1	81949623	81950244	FOXA1,HDAC2,HDAC3
Chr1	81950630	81951523	HDAC2,HDAC3
Chr1	81963303	81965449	ERG,FOXA1,GABPA,HDAC2,HDAC3,POL2
Chr1	81983226	81984584	ERG,GABPA,HDAC3,POL2
Chr1	81988283	81989541	ERG
Chr1	82024634	82026431	ERG,HDAC2,POL2
Chr1	82240889	82241855	GABPA,HDAC2,HDAC3,POL2
Chr1	82314700	82315387	ERG,POL2
Chr1	82334756	82335694	POL2
Chr1	82342744	82343902	FOXA1
Chr1	82440244	82441714	HDAC2,POL2
Chr1	82530319	82531060	ERG,HDAC2
Chr1	83250208	83251458	ERG,GABPA,POL2
Chr1	83271804	83273058	FOXA1,POL2
Chr1	83551683	83552432	POL2
Chr1	84010745	84011887	ERG,FOXA1,GABPA,POL2
Chr1	84137255	84138359	GABPA,POL2
Chr1	84235441	84236443	ERG
Chr1	84338193	84338886	FOXA1
Chr1	84609128	84610489	ERG,FOXA1,GABPA,HDAC2
Chr1	84722752	84723310	HDAC2,POL2
Chr1	84768117	84768988	ERG
Chr1	84872068	84874530	ERG,GABPA,HDAC2,HDAC3,POL2
Chr1	84875443	84876756	ERG,GABPA,HDAC2
Chr1	84891487	84892853	ERG,GABPA,HDAC2,POL2
Chr1	84898815	84899684	ERG,GABPA,POL2
Chr1	85077011	85078092	ERG,EZH2,GABPA,HDAC2
Chr1	85084581	85085771	ERG,GABPA,POL2
Chr1	85153774	85155278	HDAC2
Chr1	85299789	85301748	POL2
Chr1	85312748	85313322	FOXA1
Chr1	85338472	85340739	HDAC2
Chr1	85433231	85434356	ERG,GABPA,HDAC2,POL2
Chr1	85591589	85592276	FOXA1,POL2
Chr1	85603059	85603661	ERG,GABPA,POL2
Chr1	85763103	85764812	ERG,GABPA,HDAC2,POL2
Chr1	85779144	85780363	ERG,HDAC3,POL2
Chr1	85892746	85893778	HDAC3,POL2
Chr1	85995469	85996346	HDAC2
Chr1	86570239	86571818	BRD2,BRD3,BRD4,GABPA,HDAC2,POL2
Chr1	86580206	86581914	ERG,GABPA,POL2
Chr1	86899474	86900686	FOXA1,HDAC2,HDAC3,POL2
Chr1	87046495	87047147	GABPA
Chr1	87221414	87222427	HDAC2
Chr1	87230296	87231403	GABPA,POL2
Chr1	87258303	87259474	BRD2,ERG,GABPA,HDAC2,HDAC3,POL2
Chr1	87336352	87337343	ERG,FOXA1,POL2
Chr1	87426310	87427082	POL2
Chr1	87914787	87915458	ERG,FOXA1,GABPA,POL2
Chr1	88350646	88352135	POL2
Chr1	88367716	88368609	FOXA1,GABPA
Chr1	88369994	88370889	HDAC2,POL2
Chr1	89144329	89144839	ERG,FOXA1,GABPA,POL2
Chr1	89330120	89331269	ERG,HDAC3,POL2
Chr1	89459312	89460276	HDAC2,POL2
Chr1	90397383	90398143	POL2
Chr1	91191225	91192184	ERG,HDAC2
Chr1	91361460	91362349	ERG,GABPA,POL2
Chr1	91481303	91482007	GABPA,POL2
Chr1	91557646	91558366	ERG
Chr1	91967341	91968430	HDAC1,HDAC2,HDAC3
Chr1	92024360	92026157	FOXA1,HDAC2,POL2
Chr1	92044702	92046138	HDAC2
Chr1	92180308	92181226	POL2
Chr1	92210406	92212343	ERG,HDAC2,HDAC3,POL2
Chr1	92282385	92283941	HDAC2
Chr1	92316968	92317527	GABPA
Chr1	92651422	92652250	POL2
Chr1	93226464	93227647	ERG,HDAC2,HDAC3,POL2
Chr1	93282400	93283495	ERG,FOXA1,GABPA,POL2
Chr1	93340212	93343608	ERG,GABPA,HDAC2,HDAC3,POL2
Chr1	93704105	93704640	FOXA1
Chr1	93967073	93968498	POL2
Chr1	94018103	94019033	GABPA,POL2
Chr1	94019357	94020836	GABPA,POL2
Chr1	94049878	94051557	BRD4,FOXA1,GABPA,HDAC2,HDAC3,POL2
Chr1	94083018	94084934	GABPA,HDAC2
Chr1	94087538	94089035	ERG,FOXA1,GABPA,HDAC2,POL2
Chr1	94094384	94095581	GABPA,POL2
Chr1	94137677	94138195	BRD4,GABPA
Chr1	94636413	94637452	GABPA
Chr1	94702169	94703306	BRD2,BRD3,BRD4,HDAC2,POL2
Chr1	94716974	94718522	EZH2,HDAC2
Chr1	94793639	94794398	ERG
Chr1	94871724	94873017	ERG,FOXA1,GABPA,HDAC2,HDAC3,POL2
Chr1	95141585	95143509	GABPA,POL2
Chr1	95172254	95173554	BRD4,POL2
Chr1	95209043	95210524	ERG,EZH2,FOXA1,GABPA,HDAC2,HDAC3,POL2
Chr1	95218564	95219799	HDAC3
Chr1	95248588	95249532	BRD3,ERG,FOXA1,GABPA,HDAC2,HDAC3,POL2
Chr1	95338456	95339441	BRD4,ERG,GABPA,HDAC2,HDAC3,POL2
Chr1	95340525	95342189	ERG,GABPA,POL2
Chr1	95445153	95446387	ERG,GABPA
Chr1	95561004	95562382	GABPA
Chr1	95751974	95752475	ERG
Chr1	95753842	95754384	FOXA1
Chr1	95776357	95777965	FOXA1,GABPA
Chr1	95783348	95784389	ERG
Chr1	95797470	95799558	ERG,EZH2,GABPA,HDAC2,HDAC3,POL2
Chr1	95818048	95819326	POL2
Chr1	95832347	95833601	FOXA1
Chr1	95835381	95838120	ERG,FOXA1,GABPA,HDAC2,HDAC3,POL2
Chr1	96002230	96003453	ERG,FOXA1,POL2
Chr1	96006372	96007067	POL2
Chr1	96040327	96042260	ERG,GABPA,POL2
Chr1	96069553	96070906	ERG
Chr1	96073735	96075640	ERG
Chr1	96092204	96093276	HDAC2
Chr1	96106029	96107784	ERG,FOXA1,GABPA,HDAC2,HDAC3,POL2
Chr1	96306928	96308273	FOXA1,POL2
Chr1	96354078	96355978	ERG,GABPA,HDAC2,HDAC3,POL2
Chr1	97237954	97238645	POL2
Chr1	97331125	97331878	ERG,GABPA,POL2
Chr1	97455003	97455699	POL2
Chr1	97637497	97638188	HDAC2
Chr1	97639092	97640623	ERG,GABPA
Chr1	98088309	98089407	ERG,GABPA
Chr1	98224348	98225090	ERG,HDAC2,HDAC3
Chr1	98285750	98286844	HDAC2,POL2
Chr1	98516436	98517547	ERG
Chr1	98532128	98533241	ERG,HDAC2
Chr1	98553420	98554581	FOXA1,HDAC2
Chr1	98798565	98799758	ERG,GABPA,HDAC2,HDAC3
Chr1	98808903	98810696	ERG,FOXA1,HDAC2,HDAC3,POL2
Chr1	98895172	98896075	ERG,GABPA,POL2
Chr1	99874684	99875491	FOXA1,POL2
Chr1	99889363	99890460	ERG,FOXA1,GABPA,POL2
Chr1	100014270	100015136	HDAC3
Chr1	100080372	100081453	ERG,POL2
Chr1	100127791	100128951	GABPA,POL2
Chr1	100272162	100273095	ERG,FOXA1,HDAC2
Chr1	100287177	100287875	FOXA1
Chr1	100301866	100302570	BRD3,BRD4,FOXA1,POL2
Chr1	100452025	100453103	FOXA1,GABPA,POL2
Chr1	100895688	100896721	ERG,FOXA1,HDAC2,POL2
Chr1	100918089	100918954	POL2
Chr1	100950759	100952476	ERG,EZH2,FOXA1,GABPA,HDAC2,HDAC3,POL2
Chr1	101460627	101461882	ERG
Chr1	101647054	101648416	GABPA,POL2
Chr1	101700742	101701736	EZH2
Chr1	101710417	101710968	ERG,FOXA1,HDAC2,POL2
Chr1	102282308	102283074	ERG,GABPA
Chr1	105174165	105175204	HDAC2,HDAC3
Chr1	105214025	105214862	ERG
Chr1	105496378	105497060	HDAC2
Chr1	107083968	107084592	POL2
Chr1	107150002	107151251	FOXA1,HDAC2,POL2
Chr1	107186431	107187536	ERG,HDAC3,POL2
Chr1	107540898	107541679	ERG,GABPA,HDAC2,HDAC3,POL2
Chr1	107705716	107706351	HDAC2
Chr1	108015896	108017759	ERG,FOXA1,HDAC2,POL2
Chr1	108017773	108018755	ERG,HDAC2
Chr1	108168934	108169650	ERG
Chr1	108324442	108325992	ERG,EZH2,FOXA1,GABPA,HDAC2,HDAC3,POL2
Chr1	108587498	108588763	ERG,GABPA,HDAC2,HDAC3,POL2
Chr1	108630239	108630967	BRD4,GABPA,POL2
Chr1	108666988	108668854	ERG
Chr1	109242375	109243375	GABPA
Chr1	109247006	109248097	GABPA,HDAC2
Chr1	109723692	109724467	ERG,FOXA1,GABPA,POL2
Chr1	109841392	109841944	ERG,GABPA
Chr1	110042269	110043086	ERG,GABPA,HDAC2,POL2
Chr1	110144790	110145390	ERG
Chr1	110412025	110413022	ERG,FOXA1,GABPA,POL2
Chr1	110502711	110503670	FOXA1,GABPA
Chr1	110778386	110779402	ERG,GABPA,POL2
Chr1	110867025	110867806	HDAC2,HDAC3
Chr1	111219322	111220464	FOXA1,HDAC2
Chr1	111340832	111342458	GABPA,POL2
Chr1	111398662	111399469	ERG,GABPA,HDAC3,POL2
Chr1	111533809	111534727	POL2
Chr1	111902590	111903154	POL2
Chr1	111934431	111935125	ERG,GABPA
Chr1	111948683	111949483	BRD3,BRD4,ERG,FOXA1,GABPA,HDAC2,HDAC3,POL2
Chr1	112050421	112050937	GABPA,HDAC2
Chr1	112135458	112136355	HDAC2
Chr1	112148471	112148978	HDAC2
Chr1	112149039	112150090	ERG,HDAC2,POL2
Chr1	112399030	112400922	BRD4,GABPA,HDAC2,POL2
Chr1	112491534	112492087	ERG,GABPA
Chr1	112518435	112519318	ERG,GABPA,HDAC2,POL2
Chr1	112596627	112597655	GABPA,POL2
Chr1	112852187	112852745	ERG,POL2
Chr1	112925422	112926729	BRD4
Chr1	112991878	112992657	EZH2,FOXA1,POL2
Chr1	113004773	113005623	ERG,FOXA1,GABPA,HDAC3,POL2
Chr1	113136537	113137490	ERG,FOXA1,POL2
Chr1	113448999	113449713	ERG
Chr1	113797724	113798522	HDAC2
Chr1	113976936	113977642	FOXA1,HDAC2
Chr1	113995958	113996751	ERG,GABPA
Chr1	114576392	114577568	HDAC2,POL2
Chr1	114636218	114637225	POL2
Chr1	114976972	114978380	EZH2,FOXA1,GABPA,HDAC3
Chr1	115056841	115058276	HDAC3
Chr1	115072414	115073538	GABPA
Chr1	115082411	115083151	HDAC2
Chr1	115618378	115619319	GABPA
Chr1	115820300	115820999	ERG,GABPA
Chr1	115891851	115894018	HDAC2
Chr1	115944611	115946032	FOXA1,GABPA,POL2
Chr1	116352731	116353337	ERG,HDAC2
Chr1	116353352	116354753	ERG,GABPA,HDAC2,HDAC3,POL2
Chr1	116494906	116495813	FOXA1,POL2
Chr1	116496876	116497804	HDAC2
Chr1	116557826	116558917	ERG,EZH2,FOXA1,HDAC2,HDAC3
Chr1	116593891	116594643	ERG
Chr1	116653677	116655119	BRD2,BRD3,GABPA
Chr1	116665460	116667539	ERG,GABPA,HDAC2,HDAC3,POL2
Chr1	116676107	116677562	ERG,FOXA1,GABPA,POL2
Chr1	116745507	116746727	GABPA,POL2
Chr1	116749452	116750654	HDAC2,POL2
Chr1	116784915	116786278	GABPA,POL2
Chr1	116834911	116837072	ERG,GABPA,HDAC3,POL2
Chr1	116865174	116866659	FOXA1,GABPA,HDAC2,HDAC3,POL2
Chr1	116869013	116869796	POL2
Chr1	116872305	116874083	ERG,FOXA1,HDAC2,HDAC3,POL2
Chr1	116918614	116920065	GABPA
Chr1	116951214	116952877	GABPA
Chr1	116997348	116998692	BRD3
Chr1	117018638	117019716	GABPA,HDAC2,HDAC3,POL2
Chr1	117025664	117028563	BRD4,HDAC2
Chr1	117195066	117196106	HDAC2
Chr1	117231305	117232366	ERG
Chr1	117259710	117260713	POL2
Chr1	117568579	117569807	ERG,GABPA,HDAC2
Chr1	117811167	117812771	ERG,GABPA,HDAC3,POL2
Chr1	118104598	118106197	ERG,HDAC3,POL2
Chr1	118116517	118117695	ERG,GABPA,HDAC3,POL2
Chr1	118133761	118134651	FOXA1
Chr1	118169647	118170932	ERG
Chr1	118295863	118297729	ERG,HDAC2
Chr1	118874809	118875810	POL2
Chr1	119047171	119048375	GABPA
Chr1	119144471	119145930	ERG,GABPA,POL2
Chr1	119441742	119444332	ERG,FOXA1,HDAC2,POL2
Chr1	119594784	119596063	GABPA,HDAC2,POL2
Chr1	119883561	119884876	GABPA
Chr1	119921578	119922414	GABPA
Chr1	119970363	119971462	GABPA
Chr1	120160382	120160950	GABPA
Chr1	120168517	120169598	FOXA1,HDAC2
Chr1	120180195	120180991	POL2
Chr1	120202691	120203618	ERG,POL2
Chr1	120308570	120309443	FOXA1,HDAC2
Chr1	120310466	120311895	HDAC3,POL2
Chr1	120322329	120323156	FOXA1,GABPA,POL2
Chr1	121184511	121185396	ERG,FOXA1,GABPA,HDAC3
Chr1	121288262	121289871	ERG,FOXA1,HDAC2,HDAC3,POL2
Chr1	145246076	145246877	ERG,FOXA1,HDAC2,HDAC3,POL2
Chr1	145427057	145427853	ERG,POL2
Chr1	145437402	145438163	ERG,GABPA,HDAC2
Chr1	145439031	145439755	HDAC2
Chr1	145542408	145543409	ERG,GABPA,HDAC2,POL2
Chr1	145573791	145574573	HDAC2
Chr1	145575457	145575971	EZH2,HDAC2,POL2
Chr1	146581032	146582502	GABPA,POL2
Chr1	146713508	146714757	BRD2,BRD3,BRD4,ERG,GABPA,HDAC2,POL2
Chr1	146822010	146823450	FOXA1,GABPA,HDAC2,POL2
Chr1	147057364	147058112	POL2
Chr1	147084208	147084830	ERG,FOXA1,HDAC2,POL2
Chr1	147098149	147099297	POL2
Chr1	147113411	147114529	ERG,FOXA1,GABPA,HDAC3,POL2
Chr1	149980265	149981418	FOXA1,HDAC2
Chr1	149986312	149987269	FOXA1,HDAC3
Chr1	150533602	150534169	BRD3,BRD4,GABPA,POL2
Chr1	150540272	150540840	HDAC2
Chr1	150548226	150548920	ERG,FOXA1,HDAC2
Chr1	151174361	151175385	ERG
Chr1	151207429	151208662	GABPA,POL2
Chr1	151345167	151345729	BRD2,BRD4,FOXA1,GABPA,POL2
Chr1	151362937	151364745	GABPA,HDAC2,HDAC3
Chr1	151568990	151569497	FOXA1,GABPA,POL2
Chr1	151897405	151898673	ERG,GABPA,HDAC2
Chr1	151925657	151926950	GABPA,HDAC2
Chr1	151933217	151934060	ERG,FOXA1,GABPA,HDAC2,POL2
Chr1	152007282	152007998	ERG,GABPA,HDAC1,HDAC2
Chr1	152009118	152009954	ERG,GABPA,HDAC1,HDAC2,POL2
Chr1	152019666	152020900	BRD2,BRD3,BRD4,ERG,GABPA,HDAC3,POL2
Chr1	152058855	152060257	ERG,FOXA1,GABPA,POL2
Chr1	152140661	152142153	POL2
Chr1	152163364	152165162	BRD3,ERG,EZH2,FOXA1,GABPA,HDAC2,HDAC3,POL2
Chr1	152165898	152166543	ERG,HDAC2
Chr1	152698459	152699725	ERG,GABPA,POL2
Chr1	154158882	154159735	ERG,FOXA1,HDAC2
Chr1	154171317	154172272	ERG
Chr1	154309990	154310500	BRD3
Chr1	154323676	154324527	FOXA1,HDAC2,POL2
Chr1	154390038	154391340	FOXA1,GABPA,HDAC3,POL2
Chr1	154689581	154690897	ERG,GABPA,POL2
Chr1	154696013	154697122	ERG,FOXA1,GABPA,HDAC2,POL2
Chr1	154708629	154709886	ERG,GABPA
Chr1	154732424	154733120	BRD2,BRD3,BRD4
Chr1	154756996	154757975	BRD3,GABPA,POL2
Chr1	154778817	154780109	HDAC2
Chr1	154780383	154783390	BRD2,BRD3,BRD4,HDAC2
Chr1	154787163	154789267	ERG,GABPA,HDAC2,HDAC3,POL2
Chr1	154807803	154809519	ERG,EZH2,FOXA1,GABPA,HDAC2,HDAC3,POL2
Chr1	154809530	154810469	BRD4,HDAC2
Chr1	154849585	154851553	BRD2,BRD3,BRD4,FOXA1,GABPA,POL2
Chr1	154857143	154858493	FOXA1,GABPA,HDAC2,HDAC3,POL2
Chr1	154948493	154949191	HDAC1,HDAC2
Chr1	154989418	154990634	BRD2,BRD3,BRD4,ERG,GABPA,HDAC2,HDAC3,POL2
Chr1	154994861	154996015	BRD3,BRD4,ERG,GABPA,HDAC2,POL2
Chr1	155010774	155012004	EZH2,GABPA,HDAC2,HDAC3,POL2
Chr1	155021654	155023173	BRD2,BRD3,BRD4,ERG,GABPA,HDAC2,POL2
Chr1	155770528	155771055	ERG
Chr1	156259453	156260291	ERG,HDAC3
Chr1	156695327	156696186	GABPA
Chr1	157253476	157255274	BRD2,BRD3,HDAC2
Chr1	157389173	157390744	BRD2,BRD3,BRD4,HDAC2,POL2
Chr1	160101493	160102519	ERG,EZH2,GABPA,HDAC2,HDAC3,POL2
Chr1	160171350	160172834	ERG
Chr1	160910564	160911520	BRD2
Chr1	160919190	160920060	ERG,POL2
Chr1	160920743	160921711	BRD2,BRD4,GABPA
Chr1	161693160	161694123	ERG,EZH2,HDAC2
Chr1	161735544	161736134	BRD4,ERG,GABPA,HDAC2,POL2
Chr1	161793715	161795135	FOXA1
Chr1	161853927	161855046	EZH2,FOXA1,HDAC2,HDAC3
Chr1	161918245	161919249	GABPA,HDAC3,POL2
Chr1	162006445	162008138	POL2
Chr1	162158779	162160171	HDAC2,POL2
Chr1	162175960	162177763	HDAC2
Chr1	162183129	162184214	POL2
Chr1	162194102	162194913	HDAC2
Chr1	162530116	162531204	BRD4,FOXA1,HDAC2,POL2
Chr1	162537982	162539399	ERG,GABPA,POL2
Chr1	162548101	162550040	ERG,HDAC2
Chr1	162557349	162558119	ERG
Chr1	162629852	162631127	GABPA,HDAC2,POL2
Chr1	162702059	162703376	GABPA,POL2
Chr1	162843009	162844550	ERG,FOXA1,GABPA,POL2
Chr1	162900013	162901041	FOXA1,HDAC2,HDAC3
Chr1	163052179	163053408	ERG,GABPA,HDAC2
Chr1	163053783	163054709	ERG,GABPA,HDAC3,POL2
Chr1	163291880	163292873	BRD2,BRD4,ERG,GABPA,HDAC1,HDAC2
Chr1	163553522	163554195	ERG,FOXA1
Chr1	163586440	163587488	POL2
Chr1	163736059	163736795	FOXA1
Chr1	163809532	163810716	ERG,HDAC2
Chr1	163840414	163840915	ERG,FOXA1
Chr1	163844617	163845840	ERG,GABPA
Chr1	163984881	163986184	ERG,FOXA1,HDAC2,HDAC3,POL2
Chr1	164032739	164034200	POL2
Chr1	164637348	164638356	BRD3,HDAC3,POL2
Chr1	164840387	164841713	ERG,HDAC2
Chr1	165038665	165039899	FOXA1,POL2
Chr1	165143508	165144322	BRD4
Chr1	165161587	165162712	ERG,GABPA,HDAC2,HDAC3,POL2
Chr1	165190900	165191899	BRD3
Chr1	165658210	165658953	ERG
Chr1	165792688	165794092	ERG,EZH2,HDAC2
Chr1	165806822	165807681	ERG,POL2
Chr1	166418836	166419728	ERG,GABPA
Chr1	167094427	167095446	POL2
Chr1	167135306	167136023	HDAC2
Chr1	167160481	167161786	HDAC2
Chr1	167167457	167168692	HDAC3,POL2
Chr1	167180085	167181795	ERG,HDAC2,POL2
Chr1	167563369	167564390	ERG,POL2
Chr1	167613993	167615294	BRD2,BRD3,ERG,HDAC2,HDAC3,POL2
Chr1	167617168	167618301	GABPA,HDAC3
Chr1	167650436	167651609	GABPA
Chr1	167666420	167667970	GABPA,POL2
Chr1	167670591	167671587	HDAC2,POL2
Chr1	167764500	167765810	ERG,GABPA,POL2
Chr1	167798223	167799252	GABPA
Chr1	167880146	167881277	GABPA,POL2
Chr1	167895271	167896725	BRD4,ERG,GABPA,HDAC2,HDAC3,POL2
Chr1	168106371	168107389	GABPA,HDAC2
Chr1	168434930	168436342	ERG,FOXA1
Chr1	168460763	168461853	HDAC2,HDAC3,POL2
Chr1	168596400	168597621	ERG,FOXA1,HDAC2
Chr1	168600580	168601479	ERG,HDAC2,HDAC3,POL2
Chr1	168661983	168663305	ERG,HDAC2,POL2
Chr1	168706712	168707711	ERG,HDAC2,HDAC3,POL2
Chr1	168830694	168831482	FOXA1,HDAC2,HDAC3
Chr1	168882666	168883704	FOXA1,HDAC2
Chr1	169067528	169068561	GABPA
Chr1	169437079	169438147	HDAC2,POL2
Chr1	169453536	169455700	BRD2,BRD3,BRD4,HDAC2,POL2
Chr1	169477974	169479307	GABPA,HDAC2
Chr1	169479587	169481187	POL2
Chr1	169483841	169484678	ERG,HDAC2,POL2
Chr1	169496778	169497396	BRD3
Chr1	169537393	169538396	ERG,HDAC3,POL2
Chr1	169540760	169542001	HDAC2,HDAC3,POL2
Chr1	169543448	169544353	ERG,GABPA,POL2
Chr1	169553692	169555853	BRD2,BRD3,BRD4
Chr1	169709814	169710690	POL2
Chr1	169798037	169799090	ERG,GABPA,POL2
Chr1	169911131	169912166	ERG,FOXA1,GABPA,HDAC3,POL2
Chr1	170066212	170067672	ERG,GABPA,HDAC2,HDAC3,POL2
Chr1	170193474	170194274	ERG,POL2
Chr1	170194474	170195801	ERG,FOXA1,HDAC2,POL2
Chr1	170200716	170201517	POL2
Chr1	171053303	171054079	GABPA
Chr1	171219716	171220985	POL2
Chr1	171235994	171237145	GABPA
Chr1	171312986	171314313	FOXA1,GABPA,HDAC2,POL2
Chr1	171322103	171323463	POL2
Chr1	172368226	172369369	GABPA
Chr1	172435450	172436607	BRD2
Chr1	172438869	172440725	ERG,EZH2,FOXA1,GABPA,HDAC2,HDAC3,POL2
Chr1	172481888	172482738	ERG
Chr1	172715015	172716377	ERG,HDAC3,POL2
Chr1	172934124	172934912	POL2
Chr1	173159287	173160737	ERG,GABPA,HDAC2,POL2
Chr1	174013243	174014407	ERG,POL2
Chr1	174082942	174084045	POL2
Chr1	174537313	174538372	ERG,FOXA1,HDAC2,POL2
Chr1	174552219	174554042	FOXA1
Chr1	175201100	175202221	ERG,GABPA,HDAC3,POL2
Chr1	175319188	175319985	ERG,HDAC2,POL2
Chr1	175559212	175560612	ERG,GABPA,HDAC2,POL2
Chr1	176333174	176334094	GABPA
Chr1	176468242	176469559	POL2
Chr1	176499674	176501530	ERG,EZH2,FOXA1,GABPA,HDAC2,HDAC3,POL2
Chr1	176514755	176515672	POL2
Chr1	176527880	176529871	FOXA1
Chr1	176627107	176627903	ERG
Chr1	176662795	176663889	ERG,GABPA
Chr1	176664947	176666131	ERG,GABPA,HDAC3,POL2
Chr1	176730084	176730975	POL2
Chr1	176764824	176766005	HDAC2,HDAC3,POL2
Chr1	176782361	176783058	FOXA1,POL2
Chr1	176826284	176828050	POL2
Chr1	177409769	177410627	GABPA
Chr1	177419450	177421188	HDAC2,POL2
Chr1	177557599	177559189	BRD3,FOXA1,GABPA,HDAC2,HDAC3,POL2
Chr1	177560703	177562322	HDAC2
Chr1	177569763	177570684	ERG,GABPA,POL2
Chr1	177616246	177617008	HDAC2,POL2
Chr1	177619878	177620931	ERG,GABPA,HDAC2,HDAC3,POL2
Chr1	177669936	177671830	ERG,FOXA1,GABPA,HDAC2,HDAC3,POL2
Chr1	177841381	177842569	ERG,FOXA1,GABPA,HDAC2,HDAC3,POL2
Chr1	177881922	177882832	FOXA1,GABPA,HDAC2,POL2
Chr1	178116299	178117261	POL2
Chr1	178161593	178162098	ERG,GABPA
Chr1	178193160	178194058	ERG,HDAC3,POL2
Chr1	178306079	178307167	ERG,FOXA1,GABPA,HDAC2,HDAC3,POL2
Chr1	178418091	178419091	GABPA,HDAC2,POL2
Chr1	178611126	178612102	ERG,POL2
Chr1	178720447	178721379	GABPA
Chr1	178721748	178722707	GABPA
Chr1	178920546	178921341	GABPA,POL2
Chr1	179265563	179266323	HDAC2
Chr1	179281873	179282666	FOXA1,GABPA,HDAC2,POL2
Chr1	179319240	179319985	ERG
Chr1	179808818	179809828	ERG,GABPA,HDAC3,POL2
Chr1	179898747	179900488	ERG,FOXA1,GABPA,HDAC2,HDAC3
Chr1	179900505	179901065	ERG,HDAC2,HDAC3
Chr1	179904520	179905168	ERG
Chr1	179947050	179948220	ERG,EZH2,HDAC2,HDAC3
Chr1	180042823	180043982	ERG,POL2
Chr1	180083306	180084543	FOXA1
Chr1	180085865	180087016	BRD3,GABPA
Chr1	180095841	180096435	ERG,FOXA1,POL2
Chr1	180126568	180127421	ERG,FOXA1,HDAC2,POL2
Chr1	180136497	180137407	GABPA,POL2
Chr1	180142555	180143900	BRD3,ERG,GABPA,POL2
Chr1	180270404	180271372	HDAC2
Chr1	180497906	180498630	HDAC2
Chr1	180529795	180530382	HDAC2
Chr1	180555517	180556245	ERG,GABPA,POL2
Chr1	180584415	180585411	ERG,POL2
Chr1	181020396	181021580	HDAC2,POL2
Chr1	181064783	181065634	ERG,GABPA,HDAC2,HDAC3,POL2
Chr1	181121728	181122599	ERG,POL2
Chr1	181227844	181229159	ERG,GABPA
Chr1	181327386	181329366	ERG,FOXA1,GABPA,HDAC2,HDAC3,POL2
Chr1	182142673	182143806	GABPA,HDAC2
Chr1	182248014	182249442	FOXA1,GABPA,POL2
Chr1	182353850	182354867	FOXA1
Chr1	182359087	182359638	HDAC1
Chr1	182379305	182380502	HDAC2,POL2
Chr1	182567510	182568265	ERG
Chr1	182610810	182611438	POL2
Chr1	182649557	182650742	ERG,GABPA
Chr1	182671531	182673519	ERG,HDAC2,HDAC3,POL2
Chr1	182673551	182674362	BRD3,ERG,HDAC2,HDAC3
Chr1	182681059	182682011	HDAC3
Chr1	182694412	182695094	GABPA
Chr1	182878532	182879255	FOXA1
Chr1	182937651	182939411	ERG,FOXA1,GABPA,HDAC2,HDAC3,POL2
Chr1	183021428	183023243	ERG,FOXA1,GABPA,HDAC2,HDAC3,POL2
Chr1	183029200	183031385	BRD4,POL2
Chr1	183038553	183039833	HDAC2,POL2
Chr1	183057804	183058907	POL2
Chr1	183921774	183923065	ERG,POL2
Chr1	184047701	184048687	ERG,GABPA,POL2
Chr1	184263661	184264712	FOXA1,POL2
Chr1	184371459	184372537	BRD3
Chr1	184391555	184392752	ERG,GABPA,HDAC2,HDAC3,POL2
Chr1	184422273	184423270	FOXA1
Chr1	184462452	184463949	ERG,GABPA,HDAC2,HDAC3
Chr1	184472543	184474165	BRD4,GABPA
Chr1	184530744	184532474	ERG,GABPA
Chr1	184566633	184567518	GABPA
Chr1	184589409	184592127	BRD2,HDAC2,HDAC3,POL2
Chr1	184601573	184602605	HDAC2,HDAC3
Chr1	184724560	184725172	ERG
Chr1	184728469	184729460	FOXA1
Chr1	184759720	184760717	FOXA1,HDAC2
Chr1	184769867	184770778	ERG,GABPA,POL2
Chr1	184771683	184773010	ERG,FOXA1,HDAC3,POL2
Chr1	184805357	184806861	ERG,FOXA1,GABPA,POL2
Chr1	184830839	184831738	ERG,HDAC3,POL2
Chr1	184874484	184875475	FOXA1,HDAC3,POL2
Chr1	184898649	184899833	ERG,FOXA1,GABPA,HDAC2,HDAC3,POL2
Chr1	184980008	184980938	ERG,HDAC2,POL2
Chr1	185126669	185128074	HDAC2
Chr1	185144469	185145362	BRD3
Chr1	185218274	185219687	ERG,GABPA,POL2
Chr1	185311555	185312687	POL2
Chr1	185446449	185447601	GABPA
Chr1	185458638	185461636	ERG,FOXA1,POL2
Chr1	185503079	185504788	ERG,FOXA1,GABPA,HDAC2,HDAC3,POL2
Chr1	185513572	185515075	HDAC3
Chr1	185524475	185525708	ERG
Chr1	185596126	185596681	FOXA1
Chr1	185665353	185666751	ERG,FOXA1,HDAC2,HDAC3,POL2
Chr1	185674640	185675640	ERG,FOXA1,HDAC3,POL2
Chr1	186461158	186463037	HDAC2,POL2
Chr1	186489995	186491699	ERG
Chr1	186534859	186536744	ERG,GABPA,HDAC3,POL2
Chr1	187245373	187246601	ERG,HDAC2,POL2
Chr1	187276018	187276669	FOXA1,POL2
Chr1	187290733	187291856	HDAC2
Chr1	187321134	187322017	ERG,HDAC2,POL2
Chr1	187486629	187487292	ERG,FOXA1,HDAC2
Chr1	187487302	187488456	HDAC2
Chr1	187492283	187493381	FOXA1,HDAC2
Chr1	187728714	187730209	HDAC2
Chr1	187750911	187751893	ERG,HDAC2
Chr1	187806649	187807649	POL2
Chr1	187940621	187941753	ERG,FOXA1,GABPA,HDAC2,POL2
Chr1	190421094	190421777	ERG,FOXA1,GABPA,POL2
Chr1	190556912	190557894	FOXA1
Chr1	192465170	192466525	HDAC2,POL2
Chr1	192659798	192661029	FOXA1,HDAC2,POL2
Chr1	192823466	192824160	FOXA1,GABPA
Chr1	192830583	192831651	ERG,HDAC2,HDAC3,POL2
Chr1	192976764	192977787	ERG,POL2
Chr1	192978087	192979175	ERG
Chr1	193005178	193006135	FOXA1,POL2
Chr1	193077720	193078594	ERG,HDAC2,POL2
Chr1	193463403	193464561	HDAC2
Chr1	193645816	193646690	ERG
Chr1	193731554	193732171	ERG
Chr1	193823760	193824696	ERG,FOXA1,GABPA,HDAC2,HDAC3,POL2
Chr1	195942457	195943411	ERG,GABPA
Chr1	196025291	196026897	ERG,HDAC2,POL2
Chr1	197012011	197012818	POL2
Chr1	197297698	197298383	BRD3
Chr1	197511008	197511931	HDAC2
Chr1	198048817	198049625	FOXA1,GABPA,HDAC2
Chr1	198625384	198626537	ERG
Chr1	198806299	198807289	ERG,GABPA,HDAC3,POL2
Chr1	199789771	199791266	HDAC2
Chr1	199951957	199952546	POL2
Chr1	199985563	199986743	HDAC2
Chr1	200053268	200054794	ERG,GABPA,HDAC2
Chr1	200080155	200081558	POL2
Chr1	200724347	200725259	POL2
Chr1	201235216	201236251	POL2
Chr1	201250213	201252113	ERG,FOXA1,HDAC2,HDAC3,POL2
Chr1	201252595	201253416	BRD2,BRD3,BRD4,ERG,GABPA,HDAC2,HDAC3,POL2
Chr1	201276965	201279212	BRD4,ERG,GABPA,HDAC2,HDAC3,POL2
Chr1	201279235	201279798	HDAC2
Chr1	201744085	201745027	HDAC2,POL2
Chr1	202318488	202319170	HDAC2
Chr1	202349135	202350014	GABPA,POL2
Chr1	202374952	202375694	POL2
Chr1	202522723	202523457	ERG,GABPA
Chr1	202537601	202538423	GABPA,HDAC2
Chr1	202682150	202682955	GABPA,POL2
Chr1	202888413	202889017	ERG,GABPA
Chr1	203068557	203069505	GABPA,POL2
Chr1	203131863	203132555	ERG,GABPA
Chr1	203237786	203238686	BRD2,BRD3,BRD4,ERG,GABPA,POL2
Chr1	203348536	203349521	GABPA
Chr1	203365865	203366939	HDAC2
Chr1	203379346	203380141	GABPA
Chr1	203395980	203396601	ERG
Chr1	203398178	203399129	ERG,GABPA,HDAC2,POL2
Chr1	203945115	203946000	FOXA1,GABPA,HDAC2
Chr1	204057853	204058850	BRD3,BRD4,ERG,GABPA,HDAC2,HDAC3,POL2
Chr1	204255642	204256689	ERG,GABPA,POL2
Chr1	204347406	204349013	GABPA,HDAC2,POL2
Chr1	204374677	204375655	GABPA,POL2
Chr1	204386289	204386847	FOXA1,GABPA
Chr1	204850954	204852363	EZH2,GABPA,POL2
Chr1	205494376	205495056	GABPA
Chr1	205601072	205601813	BRD4,ERG,GABPA,HDAC2,POL2
Chr1	205601957	205603027	ERG,HDAC2
Chr1	205667652	205668926	ERG,HDAC2,HDAC3,POL2
Chr1	205671874	205672655	ERG,FOXA1,HDAC2,HDAC3,POL2
Chr1	205677998	205680441	HDAC2
Chr1	205792608	205793609	HDAC2
Chr1	205803565	205804541	ERG,HDAC2
Chr1	206196097	206196950	POL2
Chr1	206290587	206291754	FOXA1
Chr1	206327407	206328083	GABPA,HDAC2
Chr1	206651350	206652307	GABPA,HDAC2
Chr1	207015808	207017743	ERG,EZH2,HDAC2,HDAC3,POL2
Chr1	207177652	207178822	ERG,GABPA,HDAC2,HDAC3,POL2
Chr1	207183021	207184570	ERG,GABPA,HDAC2,HDAC3,POL2
Chr1	207198539	207199319	GABPA
Chr1	207200939	207201916	BRD4,FOXA1,HDAC2
Chr1	207203183	207203733	GABPA,HDAC3
Chr1	207204504	207206310	ERG,FOXA1,GABPA,HDAC2,HDAC3,POL2
Chr1	207210683	207212086	HDAC3
Chr1	207221078	207222119	ERG,GABPA
Chr1	207222991	207224136	BRD3,BRD4,ERG,GABPA,HDAC1,HDAC2
Chr1	207240689	207241890	ERG,GABPA
Chr1	207496919	207497442	FOXA1,HDAC2
Chr1	207999412	208000751	ERG,FOXA1,GABPA,HDAC2
Chr1	208011302	208012521	BRD4,GABPA,POL2
Chr1	208039948	208040868	BRD4,FOXA1
Chr1	208057249	208058411	GABPA,HDAC2,HDAC3,POL2
Chr1	208123230	208124823	ERG,EZH2,FOXA1,GABPA,HDAC2,HDAC3,POL2
Chr1	208125600	208126322	FOXA1
Chr1	208136751	208137789	BRD2,BRD3,BRD4,ERG,FOXA1,GABPA,HDAC2,HDAC3,POL2
Chr1	208209661	208210517	GABPA
Chr1	208220575	208222044	HDAC3,POL2
Chr1	208330020	208330972	GABPA
Chr1	208466318	208467032	HDAC2
Chr1	208471712	208472640	ERG,FOXA1,GABPA,HDAC3,POL2
Chr1	208619356	208620999	ERG,GABPA,HDAC2,HDAC3
Chr1	208711626	208712773	ERG,GABPA,HDAC3,POL2
Chr1	209121970	209123111	HDAC2,HDAC3,POL2
Chr1	209544896	209545741	ERG,GABPA,HDAC2,POL2
Chr1	209551013	209551842	ERG,POL2
Chr1	209689670	209692094	ERG,GABPA,HDAC2
Chr1	209699235	209700261	GABPA
Chr1	209700836	209702257	HDAC2
Chr1	209703903	209707362	ERG,EZH2,GABPA,HDAC2,HDAC3,POL2
Chr1	209880320	209882479	POL2
Chr1	209919464	209920164	ERG,GABPA,POL2
Chr1	210592205	210593826	GABPA,HDAC2
Chr1	210696721	210698223	GABPA,HDAC2,HDAC3,POL2
Chr1	210709264	210711547	ERG,FOXA1,HDAC2,HDAC3,POL2
Chr1	210731296	210732778	ERG,GABPA,POL2
Chr1	210880972	210881892	HDAC2
Chr1	210929390	210930232	ERG
Chr1	210952194	210953627	GABPA,HDAC2
Chr1	211360339	211361402	ERG,FOXA1
Chr1	211373427	211374256	FOXA1,HDAC2
Chr1	211389744	211390301	POL2
Chr1	211431252	211431819	ERG,POL2
Chr1	211517140	211518142	ERG,GABPA,HDAC3
Chr1	211647086	211648583	GABPA,HDAC2
Chr1	211702388	211704509	POL2
Chr1	211713724	211715965	ERG,EZH2,GABPA,HDAC2,HDAC3,POL2
Chr1	212004196	212004845	ERG
Chr1	212070484	212071016	ERG,FOXA1,GABPA,POL2
Chr1	212085273	212086161	ERG,FOXA1,HDAC3,POL2
Chr1	212093471	212094373	ERG,GABPA,HDAC3,POL2
Chr1	212115707	212116728	POL2
Chr1	212261449	212262434	ERG,POL2
Chr1	212306376	212306903	POL2
Chr1	212402082	212402910	ERG,FOXA1,GABPA,HDAC2,HDAC3,POL2
Chr1	212411656	212412761	BRD3,HDAC2
Chr1	212853287	212854207	HDAC2
Chr1	213272686	213273696	HDAC2
Chr1	213914469	213915075	GABPA
Chr1	214067042	214067839	HDAC2
Chr1	214163367	214164120	EZH2
Chr1	214390068	214390628	HDAC2
Chr1	214575756	214576815	ERG
Chr1	214587822	214588714	ERG,FOXA1,GABPA,HDAC2,HDAC3,POL2
Chr1	214592340	214593647	HDAC2
Chr1	214689747	214690580	FOXA1,HDAC2
Chr1	214722026	214722900	HDAC2
Chr1	214746468	214747954	ERG,GABPA
Chr1	214757108	214758117	POL2
Chr1	215712320	215714555	ERG,GABPA,HDAC2,HDAC3,POL2
Chr1	215740951	215742312	BRD2,BRD3,BRD4,ERG,HDAC2,HDAC3
Chr1	215810259	215811297	ERG,GABPA,POL2
Chr1	216060820	216061567	GABPA
Chr1	216071353	216071890	GABPA
Chr1	216701911	216702589	GABPA,POL2
Chr1	216774071	216774586	ERG,GABPA,HDAC2,POL2
Chr1	216938769	216939524	ERG,GABPA
Chr1	217075702	217076724	ERG,FOXA1,GABPA,POL2
Chr1	217077585	217078236	ERG,HDAC2
Chr1	217641341	217642142	ERG
Chr1	217644437	217645331	HDAC2
Chr1	217699153	217700131	FOXA1,HDAC2,POL2
Chr1	218337020	218337920	EZH2,GABPA,HDAC2
Chr1	218663424	218664741	ERG,POL2
Chr1	218743545	218745514	ERG,GABPA,HDAC2,HDAC3,POL2
Chr1	218797653	218799042	ERG,GABPA,HDAC2,POL2
Chr1	218819255	218820662	ERG,GABPA,HDAC3,POL2
Chr1	218823320	218824663	ERG,POL2
Chr1	218829280	218830018	HDAC2
Chr1	218844425	218846587	ERG,GABPA
Chr1	219187434	219188392	ERG
Chr1	219334486	219335149	FOXA1,POL2
Chr1	219451948	219453979	ERG,HDAC2,HDAC3,POL2
Chr1	219482996	219484544	ERG,GABPA,POL2
Chr1	219691228	219692230	HDAC2
Chr1	219694595	219695439	GABPA
Chr1	219728881	219729847	POL2
Chr1	220083787	220084421	POL2
Chr1	220778035	220778939	FOXA1,HDAC2
Chr1	220907593	220908523	ERG,FOXA1,HDAC2,POL2
Chr1	220958230	220959318	ERG,GABPA,HDAC1,HDAC2,POL2
Chr1	220985421	220986137	ERG,GABPA,HDAC2,POL2
Chr1	221091756	221092461	FOXA1,HDAC2,POL2
Chr1	221316057	221317392	HDAC2
Chr1	221482822	221483871	HDAC2
Chr1	221567193	221568195	ERG,FOXA1,GABPA,POL2
Chr1	221947362	221948674	ERG,FOXA1,GABPA,POL2
Chr1	222018924	222020063	BRD2,BRD3,BRD4,ERG,GABPA,HDAC2,HDAC3,POL2
Chr1	222520644	222521720	ERG,FOXA1,GABPA,HDAC2,POL2
Chr1	222719239	222720258	ERG,HDAC2
Chr1	222773351	222774160	ERG,GABPA,HDAC3,POL2
Chr1	222796025	222797210	ERG,GABPA,HDAC2,HDAC3,POL2
Chr1	222844971	222846063	BRD3,ERG
Chr1	222978243	222978880	ERG,POL2
Chr1	223119436	223120539	ERG,GABPA,HDAC2,HDAC3,POL2
Chr1	223121246	223122459	ERG,GABPA
Chr1	223180267	223181419	GABPA
Chr1	223421831	223422800	ERG,GABPA,HDAC2,POL2
Chr1	223440182	223440948	ERG,POL2
Chr1	223441016	223441789	ERG
Chr1	223592950	223593719	FOXA1,GABPA,POL2
Chr1	223638674	223639438	ERG,GABPA
Chr1	223673784	223674541	GABPA
Chr1	223894288	223894812	FOXA1,HDAC2
Chr1	223921775	223922852	BRD4,POL2
Chr1	223972974	223974358	ERG,FOXA1,GABPA,HDAC2,HDAC3
Chr1	224073969	224074549	FOXA1
Chr1	224330704	224331228	FOXA1,GABPA,HDAC2,HDAC3,POL2
Chr1	224369364	224370830	ERG,GABPA,HDAC1,HDAC2,POL2
Chr1	224374217	224375124	HDAC2
Chr1	224464522	224465685	HDAC2,HDAC3,POL2
Chr1	224492143	224493228	ERG,FOXA1,GABPA,POL2
Chr1	224504835	224505741	ERG,FOXA1,POL2
Chr1	224691239	224692030	ERG,GABPA,POL2
Chr1	224716662	224717392	ERG,GABPA
Chr1	224827469	224828084	ERG,FOXA1,GABPA,HDAC3,POL2
Chr1	224897677	224898696	GABPA
Chr1	225071581	225072355	ERG,FOXA1,HDAC2,HDAC3,POL2
Chr1	225600145	225601233	HDAC2,POL2
Chr1	225605536	225606408	ERG,GABPA,POL2
Chr1	225613113	225614157	HDAC2
Chr1	225844867	225846209	ERG,GABPA,HDAC2
Chr1	225881675	225882623	ERG,FOXA1,GABPA,HDAC2,HDAC3,POL2
Chr1	225923451	225924830	GABPA,POL2
Chr1	225959897	225961357	ERG,FOXA1,GABPA,HDAC2,HDAC3,POL2
Chr1	226008380	226008908	POL2
Chr1	226009084	226010057	POL2
Chr1	226078555	226079631	ERG,HDAC2,HDAC3,POL2
Chr1	226667159	226667812	ERG,FOXA1,GABPA,HDAC3,POL2
Chr1	226763174	226763874	GABPA,HDAC2
Chr1	226890217	226891709	BRD2,BRD3,BRD4,ERG,FOXA1,GABPA,HDAC2,POL2
Chr1	227204246	227205333	POL2
Chr1	228079186	228080152	ERG
Chr1	228801652	228803811	ERG,GABPA,HDAC2,HDAC3,POL2
Chr1	228826934	228828433	FOXA1
Chr1	228856752	228857784	FOXA1,GABPA,POL2
Chr1	228863018	228865006	FOXA1,HDAC2,HDAC3,POL2
Chr1	228916489	228917917	BRD2,BRD3,BRD4,POL2
Chr1	228940125	228941712	ERG,GABPA,HDAC2,HDAC3
Chr1	228989114	228990207	FOXA1,GABPA,HDAC2,HDAC3,POL2
Chr1	228996215	228997924	HDAC2,HDAC3
Chr1	229002471	229004081	HDAC2,POL2
Chr1	229038393	229039668	ERG,GABPA,HDAC2
Chr1	229194442	229196103	ERG,GABPA,HDAC2,HDAC3,POL2
Chr1	229283710	229285433	BRD2,BRD3,BRD4,GABPA,HDAC2
Chr1	229343065	229345699	ERG,GABPA,HDAC2,HDAC3
Chr1	229356698	229358163	BRD3,BRD4,ERG,FOXA1,GABPA,HDAC2,HDAC3,POL2
Chr1	229358762	229359448	HDAC2
Chr1	229364847	229367619	ERG,GABPA,HDAC2,HDAC3,POL2
Chr1	229407561	229408362	ERG,FOXA1,HDAC2
Chr1	229408902	229410242	ERG,HDAC2,HDAC3,POL2
Chr1	229455381	229456340	ERG
Chr1	229651782	229652586	POL2
Chr1	229957582	229958642	ERG
Chr1	229979610	229981435	BRD3,FOXA1,GABPA,HDAC2,POL2
Chr1	230115550	230116519	FOXA1,POL2
Chr1	230123410	230125123	ERG,GABPA,HDAC2,POL2
Chr1	230320612	230322365	ERG,GABPA,POL2
Chr1	230406367	230406894	ERG,GABPA
Chr1	230417484	230418021	ERG,GABPA,POL2
Chr1	230628057	230629047	ERG,EZH2,FOXA1,HDAC2,HDAC3,POL2
Chr1	230817644	230818974	ERG,GABPA,HDAC2
Chr1	230866518	230867477	GABPA,HDAC2
Chr1	231085824	231086824	ERG
Chr1	231102017	231102809	GABPA
Chr1	231184905	231185533	FOXA1,GABPA,POL2
Chr1	231413382	231414470	GABPA,POL2
Chr1	231461617	231462856	ERG,FOXA1,POL2
Chr1	231787170	231788251	BRD4,ERG,GABPA,HDAC2,HDAC3,POL2
Chr1	231809988	231811069	POL2
Chr1	231819581	231821312	BRD3,BRD4,ERG,EZH2,FOXA1,GABPA,HDAC2,HDAC3,POL2
Chr1	231843227	231843879	ERG
Chr1	231856398	231857482	ERG,GABPA,POL2
Chr1	231863475	231864625	HDAC2,POL2
Chr1	231884218	231885137	HDAC2
Chr1	231983878	231985221	HDAC2,POL2
Chr1	232418648	232419808	ERG,GABPA
Chr1	232420705	232422206	GABPA,POL2
Chr1	232440398	232441222	GABPA,POL2
Chr1	232441892	232442897	ERG,GABPA,POL2
Chr1	232455746	232456748	HDAC3
Chr1	232457723	232459640	ERG,FOXA1,GABPA,HDAC2,HDAC3,POL2
Chr1	232693127	232694096	ERG,GABPA,HDAC2,POL2
Chr1	232800673	232801568	ERG,FOXA1,HDAC2,HDAC3
Chr1	232813621	232814898	GABPA,HDAC2
Chr1	232842638	232843600	ERG,GABPA,POL2
Chr1	232900379	232901058	ERG,POL2
Chr1	233434776	233435567	ERG,FOXA1,GABPA,POL2
Chr1	233447619	233448985	ERG,HDAC3
Chr1	233508341	233509315	ERG,GABPA
Chr1	233712797	233713785	FOXA1
Chr1	233790124	233790984	HDAC2
Chr1	233840246	233841735	ERG,HDAC3,POL2
Chr1	233850394	233851180	FOXA1
Chr1	234182260	234183737	ERG,HDAC3,POL2
Chr1	234243038	234244066	ERG,FOXA1,HDAC2,HDAC3,POL2
Chr1	234778615	234779657	ERG,GABPA,HDAC2,POL2
Chr1	234859378	234860826	BRD3,BRD4,ERG,FOXA1,GABPA,POL2
Chr1	234997254	234999056	BRD4,ERG,GABPA,HDAC3,POL2
Chr1	235011201	235012113	POL2
Chr1	235053301	235054750	ERG,GABPA,HDAC2,HDAC3,POL2
Chr1	235095215	235098265	BRD2,BRD3,BRD4,ERG,FOXA1,GABPA,HDAC2,HDAC3,POL2
Chr1	235132756	235133549	BRD3,BRD4,GABPA,POL2
Chr1	235571577	235573362	ERG,GABPA,HDAC2,POL2
Chr1	235981465	235982362	ERG
Chr1	236111973	236113081	ERG,GABPA,HDAC2
Chr1	236505427	236506526	FOXA1
Chr1	236552146	236553404	ERG,HDAC2,POL2
Chr1	236662036	236662795	FOXA1,POL2
Chr1	236678157	236678821	ERG,FOXA1,HDAC2,HDAC3,POL2
Chr1	237888533	237889318	ERG,HDAC3
Chr1	239188963	239190697	HDAC2,HDAC3
Chr1	239204363	239205078	POL2
Chr1	239219962	239220572	GABPA
Chr1	239302823	239303723	ERG,FOXA1
Chr1	239375702	239376680	HDAC2
Chr1	239492990	239494040	ERG,GABPA,POL2
Chr1	239798112	239799385	HDAC2,POL2
Chr1	239875867	239876438	ERG,GABPA
Chr1	239882243	239883468	ERG,HDAC2,POL2
Chr1	239917564	239918235	ERG,FOXA1,POL2
Chr1	239996838	239997749	ERG,GABPA,HDAC2,POL2
Chr1	240039972	240040498	FOXA1,GABPA,HDAC2,HDAC3
Chr1	240042255	240043225	GABPA,POL2
Chr1	240046405	240047634	HDAC2,POL2
Chr1	240197948	240198548	ERG
Chr1	240248704	240249683	ERG,HDAC3,POL2
Chr1	240275665	240276412	ERG,GABPA
Chr1	240354204	240355164	HDAC2
Chr1	240574434	240575407	POL2
Chr1	240671122	240672344	HDAC2,POL2
Chr1	240685532	240686736	ERG
Chr1	240735114	240736362	FOXA1,HDAC2
Chr1	240759704	240761246	BRD3,BRD4,GABPA,POL2
Chr1	240830425	240831377	GABPA,POL2
Chr1	240906349	240907453	ERG,GABPA,HDAC2,HDAC3,POL2
Chr1	241069409	241070404	GABPA
Chr1	241197462	241198422	ERG,POL2
Chr1	241371637	241372413	POL2
Chr1	241391346	241392381	ERG
Chr1	241437767	241438683	ERG,FOXA1,GABPA
Chr1	241554950	241555708	ERG,HDAC2,HDAC3,POL2
Chr1	241623406	241624063	POL2
Chr1	241751553	241752541	ERG
Chr1	241773049	241774144	FOXA1,GABPA,POL2
Chr1	241779464	241780162	POL2
Chr1	242402312	242403403	ERG,FOXA1,POL2
Chr1	242406189	242407206	BRD4,ERG,GABPA,POL2
Chr1	242832229	242833579	ERG
Chr1	243004591	243005485	ERG
Chr1	243438242	243439239	ERG
Chr1	243479822	243480711	ERG
Chr1	243525975	243526956	ERG
Chr1	243561009	243561875	FOXA1
Chr1	243668866	243669772	ERG,FOXA1,HDAC2
Chr1	243860665	243861245	HDAC2
Chr1	243861559	243863206	EZH2,HDAC2,HDAC3
Chr1	243954607	243956789	ERG,HDAC3
Chr1	243997304	243998086	HDAC2
Chr1	244064923	244066189	ERG,FOXA1,GABPA,HDAC2,HDAC3,POL2
Chr1	244238268	244239284	ERG
Chr1	244587662	244589201	BRD4,ERG,FOXA1,GABPA,POL2
Chr1	244825638	244826793	HDAC2,HDAC3,POL2
Chr1	244857811	244858457	BRD4,ERG,POL2
Chr1	244867960	244869711	ERG,FOXA1,GABPA,POL2
Chr1	244882426	244883671	ERG,FOXA1,HDAC2,HDAC3,POL2
Chr1	244918792	244919697	GABPA
Chr1	244920489	244921083	BRD4
Chr1	245003661	245004238	HDAC2
Chr1	245323096	245324164	POL2
Chr1	245406118	245406884	POL2
Chr1	245421333	245422660	ERG,FOXA1,HDAC2,HDAC3,POL2
Chr1	245564632	245565179	ERG,FOXA1,HDAC2
Chr1	245916336	245917335	BRD2,BRD3
Chr1	245932111	245932742	ERG
Chr1	246038096	246038933	GABPA,POL2
Chr1	246161420	246161922	ERG
Chr1	246162516	246163742	ERG,GABPA,HDAC2,POL2
Chr1	246206626	246207461	ERG,FOXA1,GABPA,POL2
Chr1	246215105	246216604	ERG,POL2
Chr1	246329021	246330486	ERG,FOXA1,POL2
Chr1	246334271	246335347	FOXA1,POL2
Chr1	246444051	246445526	FOXA1,POL2
Chr1	246463871	246465914	ERG,GABPA,HDAC2,POL2
Chr1	246478256	246479584	ERG,GABPA
Chr1	246513685	246514737	ERG,GABPA
Chr1	246517432	246518375	HDAC2
Chr1	246544410	246545471	ERG
Chr1	246568124	246568745	POL2
Chr1	246583915	246584667	FOXA1
Chr1	246612516	246614082	ERG,GABPA,POL2
Chr1	246666237	246668040	ERG,GABPA,HDAC3,POL2
Chr1	246700936	246701737	POL2
Chr1	246771830	246772761	BRD4,ERG,FOXA1,GABPA,HDAC2,HDAC3,POL2
Chr1	246780425	246781899	GABPA,HDAC2,HDAC3,POL2
Chr1	246820542	246821506	ERG,FOXA1
Chr1	246918780	246919690	ERG
Chr1	246938677	246939415	BRD4,ERG,FOXA1,GABPA,HDAC2,HDAC3
Chr1	246990360	246991294	POL2
Chr10	135790	136719	ERG,GABPA,HDAC2,HDAC3,POL2
Chr10	319924	321298	ERG,HDAC2,HDAC3,POL2
Chr10	366520	367520	POL2
Chr10	468189	469097	HDAC2
Chr10	557074	558042	GABPA
Chr10	592813	593410	BRD3,BRD4,ERG,GABPA,HDAC2
Chr10	658889	659838	ERG,FOXA1,GABPA,HDAC2,POL2
Chr10	924040	925084	ERG,GABPA,HDAC2,HDAC3
Chr10	944694	946061	ERG,GABPA,HDAC2,HDAC3,POL2
Chr10	962882	963788	POL2
Chr10	993000	993886	GABPA,HDAC2
Chr10	1103252	1104590	HDAC2,HDAC3,POL2
Chr10	1162008	1163515	ERG,GABPA,HDAC2,POL2
Chr10	1233455	1234911	POL2
Chr10	1362105	1364122	ERG,GABPA,HDAC2,HDAC3,POL2
Chr10	1366471	1368609	ERG,GABPA,HDAC2,HDAC3,POL2
Chr10	1461305	1463548	BRD2,BRD3,BRD4,ERG,GABPA,HDAC3
Chr10	1474321	1475041	HDAC3
Chr10	1692827	1693910	HDAC2
Chr10	1729052	1729720	ERG
Chr10	1768663	1769735	FOXA1,HDAC3,POL2
Chr10	1773067	1774138	ERG,HDAC2
Chr10	1824698	1825635	POL2
Chr10	2042543	2043152	FOXA1
Chr10	2861073	2862176	FOXA1,HDAC2,POL2
Chr10	3028105	3029177	ERG,GABPA,HDAC2,POL2
Chr10	3093847	3094596	GABPA
Chr10	3302303	3303631	BRD2,HDAC2,POL2
Chr10	3329223	3329916	HDAC2
Chr10	3329977	3330617	BRD2,BRD3,BRD4,HDAC2,POL2
Chr10	3509686	3510534	BRD3,BRD4,ERG,GABPA,POL2
Chr10	3514014	3515197	ERG,GABPA,HDAC2,HDAC3,POL2
Chr10	3528338	3529257	POL2
Chr10	3529528	3530373	HDAC2
Chr10	3746606	3747284	HDAC2
Chr10	3789854	3790857	ERG,FOXA1,HDAC2,HDAC3,POL2
Chr10	3825930	3827139	BRD2,BRD3,BRD4,FOXA1,HDAC1,HDAC2,POL2
Chr10	3827922	3828902	BRD3,BRD4,HDAC2,POL2
Chr10	3852047	3852935	ERG,GABPA,POL2
Chr10	3870487	3872205	BRD2,BRD3,BRD4
Chr10	3894053	3896648	BRD4,ERG,GABPA,HDAC3,POL2
Chr10	3928563	3929143	GABPA,POL2
Chr10	3977882	3979246	ERG,FOXA1,GABPA,HDAC2,HDAC3,POL2
Chr10	3997657	3998604	POL2
Chr10	4004755	4005622	ERG
Chr10	4100501	4101948	HDAC2,HDAC3,POL2
Chr10	4103236	4104351	ERG,GABPA,HDAC3,POL2
Chr10	4225367	4226477	HDAC2
Chr10	4257332	4258446	GABPA
Chr10	4395959	4396963	ERG,POL2
Chr10	4681922	4682887	GABPA,HDAC2
Chr10	4703908	4704761	HDAC2
Chr10	4720005	4720868	BRD2,ERG,HDAC2,POL2
Chr10	4778427	4779912	BRD3,BRD4,GABPA,POL2
Chr10	4893766	4894518	FOXA1
Chr10	4901145	4902527	ERG,HDAC2
Chr10	5085811	5086335	POL2
Chr10	5401811	5402792	ERG,HDAC2
Chr10	5544776	5546195	BRD2,BRD3,BRD4,ERG,GABPA,HDAC2,HDAC3,POL2
Chr10	5551975	5552850	HDAC2,HDAC3
Chr10	5554640	5556254	ERG,GABPA,HDAC2
Chr10	5589000	5590328	ERG,GABPA,HDAC2,POL2
Chr10	5595884	5597443	ERG,GABPA,HDAC2,HDAC3,POL2
Chr10	5615419	5617286	BRD4,ERG,GABPA,HDAC2,HDAC3,POL2
Chr10	5621392	5622206	ERG,HDAC2,POL2
Chr10	5786242	5787574	GABPA,HDAC2,HDAC3,POL2
Chr10	5787599	5789385	GABPA
Chr10	5831298	5832390	FOXA1,HDAC2,HDAC3
Chr10	5939280	5940273	GABPA,HDAC2
Chr10	5951704	5952880	HDAC2,POL2
Chr10	5991627	5992882	BRD4,ERG,GABPA,HDAC2,HDAC3,POL2
Chr10	6013211	6014169	ERG,GABPA,HDAC2,HDAC3
Chr10	6297047	6298341	ERG,FOXA1,GABPA,POL2
Chr10	6329100	6330145	HDAC3,POL2
Chr10	6376137	6377458	ERG,FOXA1,GABPA,POL2
Chr10	6403259	6405167	ERG,GABPA,POL2
Chr10	6406880	6408229	ERG,FOXA1,GABPA,HDAC2,HDAC3
Chr10	7124380	7125202	FOXA1
Chr10	7126290	7126917	FOXA1,POL2
Chr10	7226922	7227573	ERG,FOXA1,GABPA
Chr10	7244211	7245364	HDAC2,HDAC3
Chr10	7273330	7274541	ERG,HDAC2
Chr10	7275137	7276194	ERG,FOXA1,POL2
Chr10	7396240	7397364	HDAC2,HDAC3
Chr10	7455322	7455831	EZH2
Chr10	7597447	7598429	ERG,HDAC2,HDAC3
Chr10	7600933	7601978	HDAC3,POL2
Chr10	7859090	7859699	ERG,HDAC1,HDAC2
Chr10	7957556	7958677	POL2
Chr10	8021794	8022774	ERG
Chr10	8054326	8055310	GABPA
Chr10	8107709	8109667	GABPA,HDAC2,POL2
Chr10	8121009	8122005	ERG,GABPA,HDAC2
Chr10	8169930	8171124	ERG,FOXA1,HDAC2,HDAC3,POL2
Chr10	8179304	8180435	ERG,FOXA1,GABPA,HDAC2,HDAC3,POL2
Chr10	8185644	8187421	ERG,GABPA,HDAC2,POL2
Chr10	8362136	8363501	FOXA1,POL2
Chr10	8421748	8423167	ERG,GABPA,HDAC2,POL2
Chr10	8431087	8432846	ERG,HDAC2,HDAC3,POL2
Chr10	8626342	8627389	ERG,GABPA,HDAC2,POL2
Chr10	8655849	8656987	HDAC3,POL2
Chr10	8657895	8658985	ERG,GABPA,HDAC3
Chr10	8832000	8833054	ERG,FOXA1,POL2
Chr10	8914697	8915859	POL2
Chr10	8993254	8994250	ERG,HDAC2,HDAC3,POL2
Chr10	9102043	9103035	ERG,GABPA
Chr10	9139418	9140290	ERG,POL2
Chr10	9250869	9252029	ERG,GABPA
Chr10	10656324	10657082	ERG
Chr10	11586931	11587490	HDAC2
Chr10	11651627	11652434	HDAC2
Chr10	11939988	11940742	GABPA
Chr10	11982618	11983567	POL2
Chr10	12288856	12289385	BRD2,BRD3
Chr10	12446936	12448226	FOXA1,GABPA,HDAC2,HDAC3,POL2
Chr10	12572964	12574173	FOXA1,HDAC3,POL2
Chr10	12589081	12590392	BRD3,ERG,GABPA,HDAC2,HDAC3,POL2
Chr10	12647244	12648260	BRD3,BRD4,ERG,FOXA1,GABPA,POL2
Chr10	12670636	12671668	ERG,GABPA,HDAC2
Chr10	12719919	12720911	HDAC2
Chr10	12731524	12732448	FOXA1,GABPA,HDAC2,HDAC3,POL2
Chr10	12761888	12763621	FOXA1,HDAC2,HDAC3,POL2
Chr10	13441493	13442375	ERG,HDAC2,HDAC3,POL2
Chr10	13533444	13534455	FOXA1,HDAC2,POL2
Chr10	13549771	13551580	BRD3,GABPA,HDAC2,HDAC3,POL2
Chr10	13629042	13629988	BRD2,BRD3,ERG,GABPA,HDAC1,HDAC2,POL2
Chr10	13727628	13729072	ERG,EZH2,FOXA1,GABPA,HDAC2,HDAC3,POL2
Chr10	13759600	13761645	BRD2,BRD3,BRD4,ERG,GABPA,HDAC2,POL2
Chr10	13843346	13844577	FOXA1
Chr10	13845304	13846592	GABPA,HDAC2,POL2
Chr10	13898253	13900221	ERG,GABPA
Chr10	14024707	14025976	POL2
Chr10	14032201	14034347	ERG,EZH2,GABPA,HDAC2,HDAC3,POL2
Chr10	14053704	14054368	HDAC2
Chr10	14057599	14058829	ERG,FOXA1,GABPA,HDAC2
Chr10	14083411	14085172	POL2
Chr10	14115677	14117021	GABPA,POL2
Chr10	14123833	14125497	HDAC2
Chr10	14205046	14206324	ERG,GABPA,POL2
Chr10	14210959	14212447	HDAC2,HDAC3
Chr10	14234429	14236028	ERG,FOXA1,HDAC2,HDAC3,POL2
Chr10	14301559	14302980	FOXA1,HDAC2,HDAC3,POL2
Chr10	14445257	14445815	ERG
Chr10	14449242	14450036	ERG,FOXA1,GABPA
Chr10	14613683	14614725	ERG,EZH2,FOXA1,GABPA,HDAC2,HDAC3,POL2
Chr10	14619475	14620467	ERG,GABPA
Chr10	14622443	14623280	POL2
Chr10	14658935	14660217	GABPA
Chr10	14708168	14710093	ERG,HDAC2
Chr10	14728708	14730049	FOXA1,POL2
Chr10	15165437	15166434	ERG
Chr10	15174401	15175308	GABPA,POL2
Chr10	15183520	15184493	ERG
Chr10	15200171	15201314	GABPA,HDAC2
Chr10	15557141	15558083	ERG,GABPA,HDAC2,POL2
Chr10	15643525	15644702	ERG,POL2
Chr10	15645169	15646413	ERG,GABPA,POL2
Chr10	15752084	15753180	GABPA,HDAC2,HDAC3
Chr10	16352276	16352857	POL2
Chr10	16584374	16585393	ERG,FOXA1,GABPA,HDAC3,POL2
Chr10	16585875	16586876	GABPA,HDAC2
Chr10	16644433	16645221	FOXA1,HDAC2,POL2
Chr10	17034444	17035909	ERG,GABPA,HDAC2,HDAC3,POL2
Chr10	17038048	17038793	ERG,GABPA,POL2
Chr10	17146839	17147793	ERG,HDAC2
Chr10	17179021	17180346	ERG,FOXA1,GABPA,POL2
Chr10	17185732	17186746	FOXA1,POL2
Chr10	17484500	17486284	HDAC2
Chr10	17486875	17487864	ERG,GABPA
Chr10	17507500	17508358	ERG,GABPA,POL2
Chr10	17583768	17584729	ERG,HDAC2,POL2
Chr10	17658419	17658978	HDAC1,HDAC2
Chr10	18484079	18485012	ERG
Chr10	18614793	18615682	FOXA1
Chr10	18703114	18703639	BRD2,BRD4,FOXA1
Chr10	20207243	20208342	ERG,FOXA1
Chr10	20220212	20221491	ERG,GABPA,HDAC3
Chr10	20244854	20246169	ERG,EZH2,HDAC2,HDAC3
Chr10	20268561	20269447	POL2
Chr10	21167045	21167780	FOXA1
Chr10	21177223	21178416	ERG,GABPA,HDAC2,POL2
Chr10	21184194	21185404	ERG,GABPA,HDAC2,POL2
Chr10	21472747	21474324	HDAC2
Chr10	21529998	21531146	GABPA,POL2
Chr10	21581282	21583301	ERG,HDAC2,HDAC3,POL2
Chr10	21607053	21609201	ERG,GABPA,HDAC2,HDAC3,POL2
Chr10	22342737	22343327	GABPA
Chr10	22375334	22377157	FOXA1,HDAC2,POL2
Chr10	22456970	22458016	HDAC2
Chr10	22472739	22473673	POL2
Chr10	22755417	22756534	HDAC3,POL2
Chr10	22841461	22842503	POL2
Chr10	22859976	22860847	POL2
Chr10	22903928	22905351	ERG,GABPA,HDAC2,HDAC3,POL2
Chr10	22943878	22945034	ERG,FOXA1,GABPA,HDAC2,HDAC3,POL2
Chr10	23138131	23138826	GABPA,HDAC2,POL2
Chr10	23269168	23270782	HDAC2,POL2
Chr10	23359476	23360582	ERG,HDAC3,POL2
Chr10	23369968	23371086	ERG,POL2
Chr10	24084470	24085332	FOXA1
Chr10	24116394	24117604	ERG,FOXA1,HDAC2,POL2
Chr10	24158009	24159068	ERG,FOXA1,GABPA,HDAC2,POL2
Chr10	24173372	24174612	POL2
Chr10	24323612	24324340	ERG,GABPA,HDAC3
Chr10	24528799	24529376	FOXA1
Chr10	24551927	24552855	HDAC2
Chr10	24576884	24578233	GABPA,HDAC2
Chr10	24697474	24697995	GABPA
Chr10	24704896	24705817	BRD3,BRD4,GABPA
Chr10	24783085	24783791	ERG,FOXA1,GABPA,HDAC2,POL2
Chr10	25459536	25460133	ERG,FOXA1,POL2
Chr10	27773991	27774900	HDAC2
Chr10	28227525	28228926	ERG,GABPA,HDAC2,POL2
Chr10	28623140	28623852	POL2
Chr10	28698846	28700298	HDAC2,POL2
Chr10	29062847	29063600	POL2
Chr10	29107627	29108215	POL2
Chr10	29310881	29312167	BRD4,HDAC2,POL2
Chr10	29394443	29395949	ERG,GABPA,HDAC3,POL2
Chr10	29529701	29530911	ERG,EZH2,HDAC2,HDAC3
Chr10	29565249	29566628	GABPA,POL2
Chr10	29567932	29569365	POL2
Chr10	29592277	29594809	GABPA,HDAC2
Chr10	30235459	30236855	GABPA,HDAC2
Chr10	30316426	30317298	BRD2,BRD3,BRD4,ERG,HDAC2
Chr10	30477674	30478519	FOXA1,POL2
Chr10	31080174	31080697	POL2
Chr10	31092803	31093731	POL2
Chr10	31269577	31270624	ERG,GABPA,POL2
Chr10	31432250	31432842	ERG
Chr10	31550547	31552438	HDAC2,HDAC3,POL2
Chr10	32153915	32154740	HDAC2
Chr10	32235937	32237293	ERG,GABPA,POL2
Chr10	32288265	32289598	ERG
Chr10	32459730	32460428	GABPA,POL2
Chr10	32601900	32602841	ERG,HDAC3,POL2
Chr10	32648921	32649860	HDAC2
Chr10	33151153	33152020	HDAC2
Chr10	33241663	33242731	HDAC2,POL2
Chr10	33299108	33299753	GABPA
Chr10	33603559	33604386	ERG,GABPA
Chr10	33606380	33607291	ERG,GABPA
Chr10	33797795	33799150	ERG,FOXA1,GABPA,HDAC3,POL2
Chr10	33809780	33811027	GABPA
Chr10	33890951	33891726	ERG,POL2
Chr10	34088201	34088907	POL2
Chr10	34188662	34189165	POL2
Chr10	34389391	34390280	POL2
Chr10	34440626	34442126	ERG,HDAC2,POL2
Chr10	34473838	34475138	FOXA1,HDAC2
Chr10	34483020	34485345	BRD4,ERG,GABPA,HDAC2,HDAC3,POL2
Chr10	34504850	34506510	ERG,FOXA1,GABPA,HDAC2
Chr10	34704050	34704559	HDAC2
Chr10	34708818	34709944	HDAC2
Chr10	34757969	34759841	HDAC3,POL2
Chr10	34808737	34809647	GABPA,POL2
Chr10	34914854	34916119	GABPA,HDAC2,POL2
Chr10	34921361	34923039	BRD4,ERG,GABPA,HDAC2,HDAC3,POL2
Chr10	35142647	35143866	GABPA,HDAC2,POL2
Chr10	35293523	35294220	HDAC2
Chr10	35294410	35295645	ERG,GABPA,HDAC2,HDAC3,POL2
Chr10	35419140	35419967	POL2
Chr10	35713144	35714339	POL2
Chr10	35781140	35782112	BRD4,HDAC3
Chr10	35782155	35783171	HDAC3
Chr10	35835427	35836287	HDAC2
Chr10	35922046	35922717	ERG
Chr10	35978595	35980714	ERG,FOXA1,GABPA,HDAC2,HDAC3,POL2
Chr10	36054417	36055620	POL2
Chr10	36071482	36073530	HDAC2,HDAC3,POL2
Chr10	36178818	36180512	ERG,GABPA,HDAC2,HDAC3,POL2
Chr10	36187435	36188356	BRD4
Chr10	36403911	36404916	FOXA1
Chr10	36461474	36463196	ERG,GABPA,HDAC2,HDAC3,POL2
Chr10	36466353	36467685	ERG,GABPA,HDAC2,HDAC3,POL2
Chr10	36542932	36543960	GABPA
Chr10	36564677	36565191	ERG,POL2
Chr10	36709005	36709864	ERG
Chr10	36711465	36713565	ERG,GABPA,POL2
Chr10	36941276	36942523	HDAC3
Chr10	43689360	43690430	POL2
Chr10	43755811	43756779	HDAC2
Chr10	44460246	44461888	BRD4,GABPA
Chr10	45132007	45132897	FOXA1,GABPA,HDAC2,POL2
Chr10	45168686	45170879	ERG,GABPA,HDAC2,HDAC3,POL2
Chr10	45192302	45193377	ERG,EZH2,FOXA1,GABPA,HDAC2,POL2
Chr10	45247938	45248812	FOXA1,POL2
Chr10	45345581	45346454	ERG,GABPA,HDAC2,POL2
Chr10	45496913	45498090	BRD3,ERG,GABPA,POL2
Chr10	45852286	45853018	ERG
Chr10	46990323	46991438	FOXA1,GABPA,HDAC2,POL2
Chr10	46991675	46992454	HDAC1,HDAC2
Chr10	47100389	47102427	ERG,FOXA1,HDAC2,HDAC3
Chr10	47105655	47106737	ERG,FOXA1,HDAC2,HDAC3,POL2
Chr10	47130908	47132866	ERG,FOXA1,HDAC2
Chr10	48365118	48366429	HDAC2,HDAC3
Chr10	49495561	49496961	FOXA1,GABPA,POL2
Chr10	49572587	49573660	ERG,HDAC2,POL2
Chr10	49726002	49727254	BRD4,ERG,HDAC2,HDAC3,POL2
Chr10	50582882	50583456	POL2
Chr10	50695928	50696698	ERG
Chr10	50712810	50714038	ERG,GABPA,HDAC2,POL2
Chr10	50728631	50729909	HDAC2
Chr10	51547036	51547880	GABPA,HDAC3
Chr10	51632511	51633026	POL2
Chr10	52086035	52087021	HDAC2
Chr10	52330821	52331739	HDAC2
Chr10	52332229	52333289	HDAC2
Chr10	52339566	52340348	ERG,FOXA1,HDAC2,HDAC3,POL2
Chr10	52355937	52357344	HDAC2
Chr10	52380988	52381982	ERG,HDAC1,HDAC2,HDAC3,POL2
Chr10	52710116	52710851	HDAC2
Chr10	53125450	53126923	ERG,FOXA1,GABPA,POL2
Chr10	53127171	53127971	HDAC3
Chr10	53165115	53166091	ERG,GABPA,POL2
Chr10	53227890	53229111	FOXA1
Chr10	53229159	53229951	HDAC2
Chr10	53247959	53249295	HDAC2
Chr10	53256916	53257873	HDAC2
Chr10	53670281	53671668	HDAC2
Chr10	53678761	53679680	GABPA
Chr10	53870754	53871554	HDAC2
Chr10	53896546	53897526	ERG,FOXA1,POL2
Chr10	54375000	54376192	GABPA
Chr10	54412993	54413568	GABPA
Chr10	55124412	55125779	ERG,GABPA
Chr10	55163337	55164041	BRD4,ERG,GABPA,HDAC2,POL2
Chr10	57898772	57899825	ERG,FOXA1,HDAC2,HDAC3,POL2
Chr10	58143436	58144293	HDAC2
Chr10	58717875	58718647	HDAC2
Chr10	59398249	59398878	ERG
Chr10	59519121	59520193	ERG,EZH2,FOXA1,GABPA,HDAC3,POL2
Chr10	59608446	59609430	FOXA1,POL2
Chr10	59722552	59723184	HDAC3
Chr10	59756884	59758224	POL2
Chr10	59845873	59847161	GABPA
Chr10	60227435	60229184	ERG,FOXA1,HDAC2,HDAC3,POL2
Chr10	60268917	60269971	ERG,FOXA1,POL2
Chr10	60271659	60272762	BRD2,BRD3,ERG,HDAC1,HDAC2
Chr10	60273283	60273902	ERG,GABPA,HDAC1,HDAC2
Chr10	60407504	60408817	HDAC2
Chr10	60517624	60518287	ERG,GABPA,HDAC2
Chr10	60758326	60760105	ERG,GABPA,HDAC2,HDAC3,POL2
Chr10	60821655	60822441	ERG,FOXA1,GABPA
Chr10	61059751	61060845	FOXA1,HDAC2,POL2
Chr10	61096753	61097836	GABPA,HDAC2,POL2
Chr10	61110069	61111048	FOXA1
Chr10	61125791	61126684	ERG,GABPA
Chr10	61134986	61135905	FOXA1
Chr10	61155348	61156429	ERG
Chr10	61213406	61215066	POL2
Chr10	61296228	61297642	FOXA1,GABPA,HDAC2,POL2
Chr10	61345870	61347248	GABPA,POL2
Chr10	61368236	61368854	ERG
Chr10	61633492	61634426	ERG,HDAC2,POL2
Chr10	61664470	61665407	HDAC2
Chr10	61665950	61667326	BRD2,BRD3,BRD4,ERG,GABPA,HDAC2,POL2
Chr10	61709079	61710005	FOXA1
Chr10	61750934	61752274	GABPA,POL2
Chr10	61801366	61801984	HDAC2
Chr10	61866666	61867968	FOXA1
Chr10	61934771	61935858	ERG,GABPA,HDAC2,HDAC3
Chr10	61945710	61947111	BRD2,ERG,GABPA,HDAC2
Chr10	62026966	62028237	GABPA
Chr10	62042133	62043296	POL2
Chr10	62054815	62056210	HDAC3
Chr10	62128097	62130503	ERG,FOXA1,GABPA,HDAC2,HDAC3
Chr10	62134881	62136222	ERG,FOXA1,POL2
Chr10	62146835	62148372	ERG,EZH2,GABPA,HDAC2,HDAC3,POL2
Chr10	62240407	62241449	ERG,GABPA,HDAC2,POL2
Chr10	62256612	62258629	ERG,FOXA1,HDAC2,POL2
Chr10	62408318	62410820	HDAC2
Chr10	62422133	62423923	FOXA1,HDAC2
Chr10	62485143	62486816	FOXA1,GABPA,HDAC2,HDAC3
Chr10	62490419	62491738	HDAC2
Chr10	62516772	62517409	GABPA
Chr10	62526813	62527906	GABPA
Chr10	62682539	62683813	POL2
Chr10	62788985	62789872	HDAC2
Chr10	62835103	62836426	ERG,GABPA
Chr10	62884025	62885129	ERG,EZH2,HDAC2,HDAC3,POL2
Chr10	62938803	62940181	FOXA1,HDAC2
Chr10	63005972	63007128	POL2
Chr10	63053884	63054790	GABPA
Chr10	63492026	63493381	HDAC2
Chr10	63514162	63514918	ERG
Chr10	63595730	63598847	ERG,HDAC2
Chr10	63659716	63661279	ERG,HDAC1,HDAC2
Chr10	63682805	63683801	HDAC2
Chr10	63696861	63697911	FOXA1,HDAC2,HDAC3,POL2
Chr10	63701296	63702223	ERG
Chr10	63776440	63777284	ERG,HDAC3,POL2
Chr10	63778031	63778982	FOXA1,HDAC2
Chr10	64051471	64052434	ERG
Chr10	64164257	64165675	ERG,FOXA1,GABPA,HDAC2,HDAC3,POL2
Chr10	64962200	64963149	HDAC2
Chr10	65024284	65025086	FOXA1
Chr10	65331996	65333318	ERG,HDAC2,HDAC3
Chr10	65387007	65388642	ERG,GABPA,HDAC2,POL2
Chr10	65441765	65442990	ERG,GABPA,HDAC3,POL2
Chr10	65471240	65472687	BRD4,FOXA1,GABPA,HDAC3,POL2
Chr10	65472818	65473399	HDAC3
Chr10	65558503	65559770	ERG,GABPA,POL2
Chr10	65876464	65876973	POL2
Chr10	66332952	66334674	ERG,FOXA1,GABPA,HDAC2,HDAC3,POL2
Chr10	66555569	66556517	POL2
Chr10	66626947	66627822	ERG,FOXA1,POL2
Chr10	68110069	68111074	FOXA1,HDAC2,POL2
Chr10	68385349	68386711	GABPA,HDAC2,HDAC3,POL2
Chr10	68396861	68398003	HDAC2
Chr10	68415618	68416933	ERG,GABPA,POL2
Chr10	68571995	68573424	ERG,HDAC2,HDAC3,POL2
Chr10	68620018	68621073	ERG,POL2
Chr10	68739576	68740499	ERG,POL2
Chr10	68874441	68875397	FOXA1,HDAC2
Chr10	69251155	69252981	POL2
Chr10	69280994	69281550	HDAC2
Chr10	69306994	69307943	ERG,POL2
Chr10	69457405	69458047	HDAC2
Chr10	69676595	69677489	ERG,GABPA
Chr10	69715942	69717337	FOXA1,HDAC2,HDAC3,POL2
Chr10	69865375	69867056	POL2
Chr10	69885458	69886312	ERG,GABPA,HDAC3
Chr10	70393545	70394487	FOXA1,POL2
Chr10	70982199	70983581	ERG,POL2
Chr10	71074482	71075699	ERG,FOXA1,HDAC2,HDAC3
Chr10	71077257	71077821	BRD2,BRD3,BRD4,ERG,GABPA,HDAC2,POL2
Chr10	71078259	71079073	BRD2,BRD3,BRD4,ERG,HDAC2,POL2
Chr10	71144595	71145388	HDAC2,HDAC3
Chr10	71145430	71147267	FOXA1,HDAC2,HDAC3,POL2
Chr10	71409369	71410203	FOXA1
Chr10	71421763	71422528	ERG,FOXA1,GABPA
Chr10	71517536	71518421	ERG,GABPA
Chr10	71605453	71606214	ERG,GABPA,POL2
Chr10	71671541	71672442	GABPA,POL2
Chr10	71951621	71952757	FOXA1,GABPA,HDAC2
Chr10	71987313	71988653	GABPA
Chr10	72013425	72014736	HDAC2
Chr10	72659681	72660793	HDAC2
Chr10	73000878	73001811	GABPA,POL2
Chr10	73263857	73265068	ERG,GABPA
Chr10	73272322	73273853	ERG,FOXA1,GABPA,HDAC2,POL2
Chr10	73349333	73350594	ERG,GABPA,HDAC2
Chr10	73362411	73363577	ERG,GABPA,HDAC2,POL2
Chr10	73364055	73364652	GABPA
Chr10	73855668	73856641	ERG,GABPA,HDAC2
Chr10	73857373	73858562	ERG,FOXA1,HDAC2,HDAC3,POL2
Chr10	73878863	73879904	POL2
Chr10	73889964	73890981	ERG,HDAC2
Chr10	74002749	74004433	BRD4
Chr10	74007731	74009170	ERG,GABPA,HDAC2,HDAC3,POL2
Chr10	74014512	74016288	BRD2,BRD3,BRD4,ERG,GABPA,HDAC2,HDAC3
Chr10	74543952	74544523	ERG,POL2
Chr10	74559595	74561167	ERG,GABPA
Chr10	74856295	74856957	BRD2,BRD3,BRD4,GABPA,HDAC2,POL2
Chr10	74877365	74878103	POL2
Chr10	75023119	75023840	ERG
Chr10	75091702	75092561	GABPA,POL2
Chr10	75335247	75337377	POL2
Chr10	75346048	75347575	ERG,POL2
Chr10	75347973	75349379	ERG
Chr10	75349500	75350111	ERG
Chr10	75815534	75816884	ERG,HDAC2
Chr10	75831980	75833574	GABPA
Chr10	75922701	75923658	HDAC2
Chr10	76143203	76145046	ERG,GABPA
Chr10	76179503	76182217	ERG,GABPA,POL2
Chr10	76345544	76346187	ERG,GABPA
Chr10	76545152	76546315	POL2
Chr10	76580727	76582160	ERG,HDAC2,POL2
Chr10	76583485	76584238	FOXA1,HDAC2
Chr10	76635294	76636478	ERG,FOXA1,HDAC2,HDAC3,POL2
Chr10	76656652	76657527	GABPA
Chr10	76707240	76708754	HDAC2,POL2
Chr10	76719585	76721186	EZH2,FOXA1,GABPA,HDAC2,HDAC3,POL2
Chr10	76748635	76749430	ERG,GABPA,POL2
Chr10	76779802	76783237	ERG,GABPA,HDAC2,HDAC3,POL2
Chr10	76886655	76888081	ERG,FOXA1,GABPA,HDAC3,POL2
Chr10	77266791	77268474	ERG,GABPA,HDAC2,HDAC3
Chr10	77364162	77365846	GABPA,HDAC3,POL2
Chr10	77492595	77493832	FOXA1,HDAC3,POL2
Chr10	77498342	77500210	ERG,HDAC2,POL2
Chr10	77531848	77533285	ERG,HDAC2,HDAC3,POL2
Chr10	77623487	77624857	ERG
Chr10	77663913	77664779	HDAC2
Chr10	77792832	77794488	ERG,GABPA,HDAC2,HDAC3,POL2
Chr10	77810610	77811850	ERG,FOXA1,HDAC3,POL2
Chr10	77846291	77847549	ERG
Chr10	77874340	77875339	BRD4,ERG,FOXA1,HDAC2
Chr10	77955426	77956498	GABPA
Chr10	77961422	77962409	POL2
Chr10	77965511	77966686	ERG
Chr10	78041575	78042983	ERG,HDAC2
[truncated: 16,332 more rows]
