# Supplementary material for: An AR-ERG transcriptional signature defined by long-range chromatin interactomes in prostate cancer cells
Source: HighWire-hosted journal article supplement (doi:10.1101/gr.230243.117), 2019-01-03
Supplement: Supplemental_Table_S8.xlsx [file Supplemental_Table_S8.xlsx]

## Sheet: Sheet1
Table.S8: Percentage of AR and ERG binding sites (with or without chromatin looping) overlapping with other TF ChIP-seq peaks
	AR	ERG	POL2	EZH2	FOXA1	BRD2	BRD4	HDAC2	GABPA	HDAC1	BRD3	HDAC3
AR_anchor	1	0.3017	0.3107	0.0207	0.1584	0.0189	0.0376	0.2962	0.2307	0.0052	0.0308	0.1537
AR_alone	1	0.1022	0.0907	0.0015	0.0648	0.0103	0.0197	0.062	0.0733	0.0046	0.0175	0.0105
ERG_anchor	0.5694	1	0.6167	0.0322	0.1925	0.2147	0.2752	0.577	0.6605	0.1067	0.2538	0.2219
ERG_alone	0.3668	1	0.41	0.0145	0.1165	0.2064	0.2583	0.3484	0.5103	0.0836	0.242	0.0384
