# Supplementary material for: An AR-ERG transcriptional signature defined by long-range chromatin interactomes in prostate cancer cells
Source: HighWire-hosted journal article supplement (doi:10.1101/gr.230243.117), 2019-01-03
Supplement: Supplemental_Table_S9.xlsx [file Supplemental_Table_S9.xlsx]

## Sheet: Sheet1
Table.S9: Gene pairs connected by AR-ERG co-associated chromatin loops
Gene1	Gene2
ABCB10	TAF5L
ACOX2	FAM107A
ADAM15	PMVK
ADAM9	TM2D2
ADNP	BCAS4
AKR1D1	CREB3L2
ATG12	AP3S1
ATG4B	THAP4
ATP5S	ATL1
BBS1	DPP3
BBS1	CTD-3074O7.11
BCL2L1	AL160175.1
BIRC5	TMEM235
BIRC5	AC087645.1
C10orf25	ZNF22
C1orf204	VSIG8
C2orf61	RP11-761B3.1
C8orf44	C8orf44-SGK3
CALM2	C2orf61
CALM2	RP11-761B3.1
CAMKK2	WDR66
CAPG	SH2D6
CAPG	MAT2A
CARS2	ING1
CCDC173	KLHL23
CDC37L1	PPAPDC2
CDH26	C20orf197
CDKN2C	FAF1
CENPO	PTRHD1
CHD1L	FMO5
CHD1L	PRKAB2
CKAP4	TCP11L2
CLDN8	KRTAP20-4
CLDN8	KRTAP27-1
CNOT8	FAXDC2
COPS6	AP4M1
COX11	STXBP4
COX17	PLA1A
CRISP3	RHAG
CSTL1	CST9
CTD-3222D19.2	SMIM7
CTD-3222D19.2	CTC-429P9.4
DAK	TMEM216
DBI	C2orf76
DNAJC2	PSMC2
DPP3	CTD-3074O7.11
EDEM1	AC026202.1
ELL2	RFESD
ELL2	RGMB
ERRFI1	RERE
FAM213A	MAT1A
FAM35A	GLUD1
FFAR1	KRTDAP
FMO5	PRKAB2
G3BP2	USO1
GDPD5	MOGAT2
GNRH1	DOCK5
HMGXB3	TIGD6
HOXC8	HOXC4
HSPA9	ETF1
IGHMBP2	MRPL21
IMP3	EDC3
INHA	OBSL1
INPP5K	PITPNA
IRGM	SMIM3
IRGM	AC010441.1
ITPR3	UQCC2
ITSN1	CRYZL1
JPH4	AP1G2
JTB	RAB13
KHNYN	NFATC4
KHNYN	CBLN3
KLRC3	NKG2-E
KRT4	KRT2
KRTAP20-4	KRTAP27-1
L2HGDH	ATP5S
L2HGDH	ATL1
LACTB2	XKR9
LAMA3	ANKRD29
LRP12	RP11-127H5.1
LRP2BP	ANKRD37
LRRC8A	CCBL1
LSM6	RP11-6L6.2
MARK2	NAA40
MC3R	FAM210B
MCEE	MPHOSPH10
MCM7	COPS6
MCM7	AP4M1
MED23	ENPP3
MED26	CTD-3222D19.2
MED26	SMIM7
MED26	CTC-429P9.4
MKS1	LPO
MRPL38	CDK3
MTAP	RP11-145E5.5
NBN	DECR1
NFATC4	CBLN3
NKX3-1	FP15737
NMD3	B3GALNT1
OSBPL6	PDE11A
OSBPL6	RBM45
PDE11A	RBM45
PF4	IL8
PFKFB2	C1orf116
PHOSPHO2	CCDC173
PHOSPHO2	KLHL23
PKP2	DNM1L
PLOD3	ZNHIT1
PMP22	CDRT4
PPAPDC1B	WHSC1L1
PPHLN1	GXYLT1
PRAME	LL22NC03-63E9.3
PRR4	TAS2R14
PSMA1	PDE3B
RALBP1	TWSG1
RALY	ZNF341
RAPGEF5	CDCA7L
RBX1	EP300
RGMB	RFESD
RGP1	NPR2
RHCE	TMEM57
RNF24	PANK2
S100A11	TCHHL1
SELK	ACTR8
SERINC3	PKIG
SGK3	VCPIP1
SGK3	C8orf44
SGK3	C8orf44-SGK3
SH2D6	MAT2A
SLC22A2	SLC22A3
SLC36A1	SLC36A3
SLK	ITPRIP
SMIM3	AC010441.1
SMIM7	CTC-429P9.4
SNRPB2	OTOR
SNX25	LRP2BP
SNX25	ANKRD37
SNX33	IMP3
SNX33	EDC3
SPARCL1	HSD17B11
SPATA5L1	GATM
SPRYD3	IGFBP6
ST6GALNAC1	CYGB
SWT1	TRMT1L
SYMPK	FOXA3
TBXAS1	HIPK2
TMEM235	AC087645.1
TMEM38A	MED26
TMEM38A	CTD-3222D19.2
TMEM38A	SMIM7
TMEM38A	CTC-429P9.4
TRIO	DNAH5
TRIP6	SRRT
TTF1	C9orf171
UQCC2	IP6K3
URB2	ABCB10
URB2	TAF5L
VCPIP1	C8orf44
VCPIP1	C8orf44-SGK3
WDR38	NR6A1
YAF2	PPHLN1
YAF2	GXYLT1
ZCRB1	GXYLT1
ZFAND1	CHMP4C
ZMYND8	AL031666.2
ZNF189	MRPL50
ZNF280D	TCF12
ZNF354A	ZNF354B
ZNF649	ZNF350
