# Supplementary material for: An AR-ERG transcriptional signature defined by long-range chromatin interactomes in prostate cancer cells
Source: HighWire-hosted journal article supplement (doi:10.1101/gr.230243.117), 2019-01-03
Supplement: Supplemental_Table_S10.xlsx [file Supplemental_Table_S10.xlsx]

## Sheet: Sheet1
Table.S10: Clinical differential lncRNA associated with coding genes through AR-ERG chromatin looping.
clinicalLincRNA	interacting coding gene
PCAT-71	UTRN
PCAT-75	TBXAS1
PCAT-45	CACNA1D
PCAT-94	GNAI1
PCAT-34	ACPP
PCAT-27	ACPP
PCAT-30	TNFRSF19
PCAT-49	OXSR1
PCAT-116	AP001816.1
PCAT-13	GSTCD
PCAT-90	FNIP2
PCAT-62	ZNF19
PCAT-113	CAMK2N1
PCAT-61	PMEPA1
PCAT-43	PMEPA1
PCAT-76	PMEPA1
PCAT-31	BICD1
PCAT-73	DNAH5
PCAT-32	DNAH5
PCAT-8	DNAH5
PCAT-18	ZNF773
PCAT-96	SLC25A45
PCAT-23	B3GAT1
PCAT-25	B3GAT1
PCAT-37	KLF4
PCAT-56	RPLP1
PCAT-59	RPLP1
PCAT-17	RPLP1
PCAT-118	SSFA2
PCAT-81	FAM117B
