# Supplementary material for: An AR-ERG transcriptional signature defined by long-range chromatin interactomes in prostate cancer cells
Source: HighWire-hosted journal article supplement (doi:10.1101/gr.230243.117), 2019-01-03
Supplement: Supplemental_Table_S11.xlsx [file Supplemental_Table_S11.xlsx]

## Sheet: Sheet1
Table.S11: Prostate cancer GWAS SNPs associate target genes through AR/ERG chromatin looping. The 1st column is the anchor region defined by AR or ERG ChIA-PET data, and the 2nd column is the list of target genes (separated by comma).
AR/ERG interaction anchor	Target Genes	Prostate Cancer SNP
chr1-204463738-204464350	ENSG00000133056.9|PIK3C2B	rs3014606;rs2926534
chr1-204475632-204476354	ENSG00000133056.9|PIK3C2B	rs4951389
chr10-51543189-51544334	ENSG00000138293.15|NCOA4	rs4631830;rs7075009
chr10-51547036-51547880	ENSG00000138294.9|MSMB	rs7075697
chr10-104417856-104418883	ENSG00000166272.12|WBP1L,ENSG00000171206.9|TRIM8,ENSG00000272933.1|RP11-47A8.5	rs12773833;rs12773600;rs12773833;rs12773600;rs12773600;rs12773833
chr10-122835896-122836903	ENSG00000107669.13|ATE1,ENSG00000203805.6|PPAPDC1A,ENSG00000222979.1|RN7SKP167	rs2420911;rs4567370;rs2420911;rs2420911;rs2420911;rs73361168;rs2420911;rs73361168;rs2420911;rs2420911;rs73361168;rs2420911;rs73361168;rs2420911;rs73361168;rs2420911
chr11-2214187-2215119	ENSG00000110651.7|CD81,ENSG00000185940.9|KRTAP5-5,ENSG00000238184.1|AC129929.5,ENSG00000110651.7|CD81,ENSG00000238184.1|AC129929.5	rs7937915;rs7947138;rs7125284;rs7107385;rs7107390;rs7107784;rs7107390;rs7107385;rs7125284;rs7947138;rs7937915
chr11-58925466-58926033	ENSG00000166801.11|FAM111A,ENSG00000245571.2|AP001258.4	rs12362905;rs17153415;rs10896930
chr11-68985136-68985882	ENSG00000260895.1|RP11-554A11.7	rs7929962;rs11351679;rs11351679;rs7929962
chr12-48389447-48390277	ENSG00000139219.13|COL2A1	rs1793959
chr12-53270651-53271721	ENSG00000105486.9|LIG1,ENSG00000128585.13|MKLN1,ENSG00000170477.8|KRT4,ENSG00000182898.3|TCHHL1,ENSG00000185453.8|C19orf68,ENSG00000258946.1|RP11-58E21.4,ENSG00000265009.1|AC078864.1,ENSG00000265804.1|AC078864.2,ENSG00000272724.1|RP1-288H2.4,ENSG00000167768.4|KRT1,ENSG00000170477.8|KRT4,ENSG00000170477.8|KRT4,ENSG00000170477.8|KRT4,ENSG00000172819.12|RARG,ENSG00000172867.3|KRT2,ENSG00000170477.8|…	rs4919737;rs4919740;rs4919737;rs4919740;rs4919737;rs4919740;rs4919737;rs4919740;rs4919740;rs4919740;rs4919740;rs73108429
chr12-53273034-53274754	ENSG00000170477.8|KRT4,ENSG00000170477.8|KRT4,ENSG00000172819.12|RARG,ENSG00000172867.3|KRT2	rs902773;rs902774;rs902772;rs73108440;rs17746508;rs902772;rs902773;rs73108440;rs112162741;rs7301750;rs902774;rs902773;rs902772;rs112162741;rs902774;rs112162741
chr12-53298564-53299371	ENSG00000111057.6|KRT18,ENSG00000170421.7|KRT8,ENSG00000265039.1|AC107016.2	rs137898974
chr12-53300298-53301525	ENSG00000111057.6|KRT18,ENSG00000130714.11|POMT1,ENSG00000135968.15|GCC2,ENSG00000148335.10|NTMT1,ENSG00000165119.14|HNRNPK,ENSG00000170421.7|KRT8,ENSG00000172830.8|SSH3,ENSG00000172932.10|ANKRD13D,ENSG00000173020.6|ADRBK1,ENSG00000178966.11|RMI1,ENSG00000265039.1|AC107016.2,ENSG00000111057.6|KRT18,ENSG00000170421.7|KRT8,ENSG00000265039.1|AC107016.2	rs55958994;rs55958994;rs55958994;rs55958994
chr12-53309059-53310604	ENSG00000105486.9|LIG1,ENSG00000128585.13|MKLN1,ENSG00000170477.8|KRT4,ENSG00000182898.3|TCHHL1,ENSG00000185453.8|C19orf68,ENSG00000258946.1|RP11-58E21.4,ENSG00000265009.1|AC078864.1,ENSG00000265804.1|AC078864.2,ENSG00000272724.1|RP1-288H2.4,ENSG00000111057.6|KRT18,ENSG00000170421.7|KRT8,ENSG00000265039.1|AC107016.2,ENSG00000170477.8|KRT4,ENSG00000172867.3|KRT2,ENSG00000196876.9|SCN8A	rs4919743;rs4919743;rs4919743;rs4919743;rs4919743
chr14-53386199-53387441	ENSG00000073712.9|FERMT2	rs4901313;rs4901313;rs4901313;rs4901313;rs4901313
chr16-71627511-71628592	ENSG00000187008.2|PKD1L3,ENSG00000199301.1|RNU6-208P,ENSG00000223224.1|SNORD71,ENSG00000223224.1|SNORD71	rs11648240;rs11648240;rs11648240
chr16-71697415-71698315	ENSG00000187008.2|PKD1L3,ENSG00000199301.1|RNU6-208P,ENSG00000223224.1|SNORD71,ENSG00000199301.1|RNU6-208P,ENSG00000223224.1|SNORD71	rs1035545;rs1035545
chr16-71791625-71792939	ENSG00000140829.7|DHX38,ENSG00000140830.4|TXNL4B,ENSG00000187008.2|PKD1L3,ENSG00000199301.1|RNU6-208P,ENSG00000223224.1|SNORD71,ENSG00000254823.1|RP11-109E10.1,ENSG00000187008.2|PKD1L3,ENSG00000199301.1|RNU6-208P,ENSG00000223224.1|SNORD71	rs7185997;rs9939455;rs7185997;rs9939455;rs7185997;rs7185997;rs7185997;rs7185997;rs7185997;rs7185997;rs7185997
chr16-71929535-71930261	ENSG00000102967.7|DHODH,ENSG00000102984.10|ZNF821	rs13332180
chr17-617632-618148	ENSG00000167695.10|FAM57A	rs2474694
chr17-618663-619741	ENSG00000167693.12|NXN,ENSG00000167695.10|FAM57A,ENSG00000167695.10|FAM57A,ENSG00000167695.10|FAM57A,ENSG00000167699.9|GLOD4,ENSG00000171861.6|RNMTL1	rs684232;rs461251;rs461251;rs461251
chr17-36074834-36075733	ENSG00000108753.8|HNF1B,ENSG00000108753.8|HNF1B,ENSG00000237184.1|AC091199.1	rs11649743
chr17-36103006-36103631	ENSG00000108753.8|HNF1B	rs11263763
chr17-47446878-47447820	ENSG00000198740.4|ZNF652,ENSG00000248714.2|RP11-1079K10.3,ENSG00000262039.1|RP11-81K2.1	rs79768864;rs200644650
chr17-47450699-47451858	ENSG00000198740.4|ZNF652,ENSG00000248714.2|RP11-1079K10.3,ENSG00000198740.4|ZNF652,ENSG00000248714.2|RP11-1079K10.3,ENSG00000262039.1|RP11-81K2.1	rs68145088
chr17-47453882-47454742	ENSG00000198740.4|ZNF652,ENSG00000248714.2|RP11-1079K10.3,ENSG00000262039.1|RP11-81K2.1	rs7216993;rs60676526;rs7216993;rs60676526;rs73324344
chr17-47467960-47469233	ENSG00000163746.7|PLSCR2,ENSG00000198740.4|ZNF652,ENSG00000248714.2|RP11-1079K10.3,ENSG00000262039.1|RP11-81K2.1,ENSG00000197977.3|ELOVL2,ENSG00000198740.4|ZNF652,ENSG00000248714.2|RP11-1079K10.3,ENSG00000262039.1|RP11-81K2.1,ENSG00000198740.4|ZNF652,ENSG00000212565.1|SNORA68,ENSG00000248714.2|RP11-1079K10.3,ENSG00000262039.1|RP11-81K2.1,ENSG00000198740.4|ZNF652,ENSG00000248714.2|RP11-1079K10.3,E…	rs77653195;rs16948071;rs57030023;rs57030023;rs16948071;rs77653195;rs77653195;rs16948071;rs57030023;rs77653195;rs16948071;rs57030023;rs77653195;rs57030023;rs16948071;rs77653195;rs16948071;rs57030023;rs16948071;rs57030023;rs57030023;rs16948071;rs77653195;rs16948071;rs57030023;rs57030023;rs16948071;rs77653195;rs57030023;rs16948071;rs77653195;rs77653195;rs16948071;rs57030023;rs57030023;rs16948071;rs1…
chr17-47471715-47473123	ENSG00000198740.4|ZNF652,ENSG00000248714.2|RP11-1079K10.3	rs11653775;rs11653701;rs11653701;rs11653775;rs11653701;rs11653775;rs11653701;rs11653775;rs11653701;rs11653775;rs11653775;rs11653701;rs11653775
chr17-47644858-47645913	ENSG00000262837.1|RP11-304F15.7	rs143721305;rs143721305
chr17-69111945-69113362	ENSG00000263680.2|RP11-57A1.1	rs1859963;rs1859963;rs1859963;rs1859963
chr18-76770988-76772445	ENSG00000199728.1|RNU6-655P,ENSG00000264595.1|RP11-94B19.5	rs4799269;rs4799269;rs4799269;rs4799269;rs4799269;rs4799269;rs4799269;rs4799269;rs4799269;rs4799269;rs4799269
chr19-41984613-41985782	ENSG00000007129.13|CEACAM21,ENSG00000268027.1|AC006129.2,ENSG00000268355.1|AC006129.1	rs11672691;rs887391
chr19-42022357-42023508	ENSG00000268355.1|AC006129.1	rs10406988;rs10406988
chr19-42037115-42038514	ENSG00000007129.13|CEACAM21,ENSG00000160191.13|PDE9A,ENSG00000268027.1|AC006129.2,ENSG00000268355.1|AC006129.1,ENSG00000007129.13|CEACAM21,ENSG00000163875.11|MEAF6,ENSG00000263675.1|MIR5581,ENSG00000268027.1|AC006129.2,ENSG00000268355.1|AC006129.1,ENSG00000007129.13|CEACAM21,ENSG00000268027.1|AC006129.2,ENSG00000268355.1|AC006129.1,ENSG00000268355.1|AC006129.1	rs12462897;rs12462897;rs12462897;rs12462897;rs12462897;rs12462897
chr19-42041785-42042606	ENSG00000270164.1|AC006129.4	rs2286754
chr2-10724438-10725349	ENSG00000206633.1|SNORA80B,ENSG00000217258.2|AC007249.3,ENSG00000217258.2|AC007249.3	rs34235474
chr2-85738088-85738974	ENSG00000042493.11|CAPG,ENSG00000142409.4|ZNF787,ENSG00000152292.12|SH2D6,ENSG00000168906.8|MAT2A,ENSG00000168906.8|MAT2A	rs7591175;rs7591175;rs7591175
chr2-85763909-85768069	ENSG00000042493.11|CAPG,ENSG00000142409.4|ZNF787,ENSG00000152292.12|SH2D6,ENSG00000168874.8|ATOH8,ENSG00000168906.8|MAT2A,ENSG00000042493.11|CAPG,ENSG00000142409.4|ZNF787,ENSG00000152292.12|SH2D6,ENSG00000168906.8|MAT2A,ENSG00000042493.11|CAPG,ENSG00000152292.12|SH2D6,ENSG00000168906.8|MAT2A,ENSG00000168906.8|MAT2A	rs1446668;rs3755015;rs3755014;rs1446668;rs1446668;rs1446668;rs1446668;rs1446668;rs1446668;rs1446668;rs1446668;rs1446668;rs2028900;rs2028900;rs2028900
chr2-85769550-85770729	ENSG00000042493.11|CAPG,ENSG00000152292.12|SH2D6,ENSG00000168906.8|MAT2A	rs1078004
chr2-85775045-85777085	ENSG00000042493.11|CAPG,ENSG00000152292.12|SH2D6,ENSG00000168874.8|ATOH8,ENSG00000168906.8|MAT2A,ENSG00000042493.11|CAPG,ENSG00000152292.12|SH2D6,ENSG00000168906.8|MAT2A	rs5832649;rs5832649;rs5832649;rs5832649;rs5832649
chr2-85802966-85803871	ENSG00000168874.8|ATOH8,ENSG00000168906.8|MAT2A	rs6757263
chr2-173313221-173314048	ENSG00000091409.10|ITGA6,ENSG00000272764.1|RP11-318E3.9	rs1574256;rs1574259
chr2-173330625-173331577	ENSG00000091409.10|ITGA6	rs116108611
chr2-238357979-238358753	ENSG00000115648.9|MLPH,ENSG00000222032.1|AC112721.2,ENSG00000264676.1|RN7SL204P,ENSG00000222032.1|AC112721.2	rs60079197;rs60079197;rs60079197;rs60079197
chr2-238376451-238377631	ENSG00000115648.9|MLPH,ENSG00000222032.1|AC112721.2,ENSG00000264676.1|RN7SL204P,ENSG00000222032.1|AC112721.2	rs12474519;rs12474519;rs12474519;rs12474519;rs12474519;rs12474519
chr2-238384007-238385550	ENSG00000115648.9|MLPH,ENSG00000222032.1|AC112721.2,ENSG00000264676.1|RN7SL204P	rs6729659;rs6722471
chr2-238386701-238387412	ENSG00000115648.9|MLPH	rs7584330
chr2-238392703-238393432	ENSG00000115648.9|MLPH,ENSG00000222032.1|AC112721.2,ENSG00000264676.1|RN7SL204P	rs13386290
chr2-238394350-238394915	ENSG00000115648.9|MLPH,ENSG00000222032.1|AC112721.2,ENSG00000264676.1|RN7SL204P	rs7606177
chr2-238395454-238396429	ENSG00000115648.9|MLPH	rs58057291
chr2-238434159-238435445	ENSG00000115648.9|MLPH,ENSG00000222032.1|AC112721.2,ENSG00000264676.1|RN7SL204P,ENSG00000222032.1|AC112721.2	rs7570882;rs7570882;rs7570882
chr20-49511372-49512570	ENSG00000000419.8|DPM1,ENSG00000101126.11|ADNP,ENSG00000124217.3|MOCS3,ENSG00000124243.13|BCAS4,ENSG00000124243.13|BCAS4	rs6091233;rs6091234;rs6091233;rs6091233;rs6091233;rs6091234;rs6091234;rs6091233;rs6091234;rs6091233;rs6091234;rs6091233;rs6091234;rs6091233;rs6091234
chr20-49530805-49531657	ENSG00000124243.13|BCAS4	rs41274692
chr20-49531681-49532527	ENSG00000124243.13|BCAS4	rs72029440
chr20-62338465-62339259	ENSG00000101150.13|TPD52L2,ENSG00000101246.15|ARFRP1,ENSG00000197114.7|ZGPAT,ENSG00000198276.9|UCKL1,ENSG00000243509.4|TNFRSF6B,ENSG00000273154.1|RP4-583P15.15,ENSG00000101246.15|ARFRP1,ENSG00000197114.7|ZGPAT,ENSG00000198276.9|UCKL1,ENSG00000243509.4|TNFRSF6B,ENSG00000273154.1|RP4-583P15.15	rs6062498
chr22-40436537-40438010	ENSG00000100354.16|TNRC6B,ENSG00000133477.12|FAM83F,ENSG00000100359.16|SGSM3,ENSG00000133477.12|FAM83F,ENSG00000128272.10|ATF4,ENSG00000133477.12|FAM83F,ENSG00000133477.12|FAM83F	rs11704416;rs11704416;rs11704416;rs11704416;rs11704416;rs11704416;rs11704416;rs11704416;rs11704416;rs11704416;rs11704416;rs11704416;rs11704416;rs11704416;rs11704416;rs11704416;rs11704416
chr22-40453535-40455340	ENSG00000133477.12|FAM83F	rs7290298;rs7291691;rs75942214;rs75942214;rs7291691
chr3-113294392-113295048	ENSG00000163611.7|SPICE1	rs1567780
chr4-95543825-95545505	ENSG00000138696.6|BMPR1B,ENSG00000138696.6|BMPR1B,ENSG00000249599.1|RP11-168E14.1,ENSG00000138696.6|BMPR1B,ENSG00000249599.1|RP11-168E14.1,ENSG00000249951.1|RP11-554D13.1	rs12649976;rs6853490;rs6853490;rs12649976;rs12649976;rs6853490;rs12649976;rs6853490;rs12649976;rs6853490;rs12649976;rs6853490;rs12649976;rs6853490;rs6853490;rs12649976;rs12649976;rs6853490;rs12649976;rs6853490;rs12649976;rs6853490;rs12649976;rs6853490;rs6853490;rs6853490;rs6853490;rs6853490;rs6853490
chr4-95547400-95548218	ENSG00000138696.6|BMPR1B	rs72041848
chr4-95569916-95570427	ENSG00000138696.6|BMPR1B,ENSG00000249599.1|RP11-168E14.1	rs35964087
chr4-95570888-95572639	ENSG00000138696.6|BMPR1B,ENSG00000138696.6|BMPR1B,ENSG00000249599.1|RP11-168E14.1	rs2136486;rs2136486;rs2136486;rs2136486;rs2136486;rs2136486;rs2136486
chr4-95572962-95575244	ENSG00000138696.6|BMPR1B,ENSG00000138696.6|BMPR1B,ENSG00000249599.1|RP11-168E14.1	rs12511111;rs13110828;rs12511169;rs12511111;rs11445839;rs13110828;rs12511169;rs12511169;rs13110828;rs11445839;rs11445839;rs13110828;rs12511169;rs11445839;rs13110828;rs13110828;rs11445839
chr4-95589121-95590040	ENSG00000138696.6|BMPR1B,ENSG00000138696.6|BMPR1B,ENSG00000249599.1|RP11-168E14.1	rs3762876;rs3762876;rs3762876;rs3762876
chr4-95591021-95592014	ENSG00000138696.6|BMPR1B,ENSG00000249599.1|RP11-168E14.1	rs998071
chr4-95592197-95592896	ENSG00000138696.6|BMPR1B,ENSG00000249599.1|RP11-168E14.1	rs1472962;rs1472963
chr4-95594921-95595651	ENSG00000138696.6|BMPR1B,ENSG00000249599.1|RP11-168E14.1,ENSG00000249951.1|RP11-554D13.1	rs7681843
chr4-106061426-106062448	ENSG00000251259.1|AC004069.2	rs7679673
chr6-11216980-11219695	ENSG00000114120.7|SLC25A36,ENSG00000172201.6|ID4,ENSG00000172197.9|MBOAT1,ENSG00000172201.6|ID4,ENSG00000172201.6|ID4,ENSG00000173821.15|RNF213,ENSG00000172201.6|ID4,ENSG00000197977.3|ELOVL2,ENSG00000173821.15|RNF213,ENSG00000181045.10|SLC26A11,ENSG00000181523.8|SGSH,ENSG00000197977.3|ELOVL2	rs2018334;rs2018334;rs2018334;rs2018334;rs2018334;rs2018334;rs2018334;rs2018334;rs2018334;rs2018334;rs2018334;rs2018334;rs2018334;rs2018334;rs2018334;rs2018334;rs2018334;rs2018334;rs4713266;rs4713266;rs4713266
chr6-41513266-41514722	ENSG00000137166.10|FOXP4	rs4714476;rs4714476;rs6935446;rs6935737;rs4714476;rs6935446;rs6935737
chr6-41536260-41536903	ENSG00000137166.10|FOXP4	rs4714485;rs1983891
chr6-76455780-76457401	ENSG00000196586.9|MYO6,ENSG00000196586.9|MYO6,ENSG00000252156.1|RNU6-155P,ENSG00000223169.1|RNA5SP209,ENSG00000239132.1|snoU13,ENSG00000252156.1|RNU6-155P	rs2842553;rs1321162;rs1321162;rs2842553;rs2842551;rs2842551
chr6-76566104-76567513	ENSG00000068024.12|HDAC4,ENSG00000222020.2|AC062017.1,ENSG00000223169.1|RNA5SP209,ENSG00000239132.1|snoU13,ENSG00000196586.9|MYO6,ENSG00000223169.1|RNA5SP209,ENSG00000239132.1|snoU13,ENSG00000223169.1|RNA5SP209,ENSG00000239132.1|snoU13,ENSG00000223169.1|RNA5SP209,ENSG00000239132.1|snoU13,ENSG00000252156.1|RNU6-155P	rs3798439;rs3798439;rs3798439;rs3798439;rs3798439;rs3798439;rs3798439
chr6-76576068-76576961	ENSG00000068024.12|HDAC4,ENSG00000222020.2|AC062017.1,ENSG00000223169.1|RNA5SP209,ENSG00000239132.1|snoU13,ENSG00000223169.1|RNA5SP209,ENSG00000239132.1|snoU13	rs6453845;rs6453845;rs6453845
chr6-109292321-109293304	ENSG00000199944.1|RNU6-653P,ENSG00000203801.4|LINC00222	rs1887414;rs4992384;rs4992383;rs4992382;rs4992384;rs1887414;rs4992383;rs4992382;rs1887414;rs4992384;rs4992383;rs4992382;rs4992382;rs4992383;rs4992384;rs1887414
chr6-109322990-109324307	ENSG00000135596.13|MICAL1,ENSG00000253037.1|AL109947.2,ENSG00000199944.1|RNU6-653P,ENSG00000203801.4|LINC00222	rs3839562;rs2273668;rs3839562;rs2273668;rs2273668;rs2273668;rs2273668;rs2273668;rs2273668;rs2273668
chr6-109344274-109345358	ENSG00000199944.1|RNU6-653P	rs76201299;rs141852184;rs141852184;rs76201299;rs76201299;rs141852184;rs76201299;rs141852184;rs141852184;rs76201299
chr6-109416415-109417286	ENSG00000080546.9|SESN1,ENSG00000183137.10|CEP57L1	rs1106853
chr6-109441421-109442193	ENSG00000135535.10|CD164,ENSG00000201023.1|Y_RNA	rs67570523
chr6-117208267-117210754	ENSG00000047936.6|ROS1,ENSG00000185002.5|RFX6,ENSG00000207461.1|RNU6-253P	rs339328;rs339331;rs339331;rs339331;rs339331;rs339331;rs339331;rs339331
chr6-117223556-117224508	ENSG00000185002.5|RFX6	rs339301;rs339301
chr6-117230633-117231778	ENSG00000185002.5|RFX6	rs6568967;rs6568967
chr6-117256259-117258736	ENSG00000185002.5|RFX6	rs678230;rs55915982;rs56234303;rs665401;rs675495;rs63749614;rs678230;rs55915982;rs56234303;rs665401;rs675495;rs63749614;rs678230;rs113767551;rs662657;rs1761881;rs6907088;rs678230;rs113767551;rs662657
chr6-160832833-160834003	ENSG00000112499.8|SLC22A2,ENSG00000112499.8|SLC22A2,ENSG00000146477.4|SLC22A3	rs9364554;rs9364554
chr7-20998296-20999650	ENSG00000004846.12|ABCB5,ENSG00000164651.12|SP8,ENSG00000239396.2|RN7SL414P,ENSG00000164649.15|CDCA7L,ENSG00000164651.12|SP8	rs9655205;rs9655205;rs9655205;rs9655205;rs9655205;rs9655205;rs9655205;rs9655205;rs9655205;rs9655205;rs9655205
chr7-27941121-27942012	ENSG00000164181.9|ELOVL7	rs11345518
chr7-27958727-27960313	ENSG00000005020.8|SKAP2,ENSG00000106052.9|TAX1BP1,ENSG00000005073.5|HOXA11,ENSG00000106052.9|TAX1BP1,ENSG00000206623.1|RNU6-979P,ENSG00000100906.6|NFKBIA,ENSG00000106052.9|TAX1BP1,ENSG00000106052.9|TAX1BP1,ENSG00000164181.9|ELOVL7	rs2040668
chr7-27961842-27962438	ENSG00000164181.9|ELOVL7	rs150160645
chr7-27975566-27977043	ENSG00000005020.8|SKAP2,ENSG00000164181.9|ELOVL7,ENSG00000005073.5|HOXA11,ENSG00000164181.9|ELOVL7,ENSG00000206623.1|RNU6-979P,ENSG00000035499.8|DEPDC1B,ENSG00000164181.9|ELOVL7,ENSG00000105879.7|CBLL1,ENSG00000164181.9|ELOVL7,ENSG00000106052.9|TAX1BP1,ENSG00000164181.9|ELOVL7,ENSG00000164181.9|ELOVL7,ENSG00000164181.9|ELOVL7,ENSG00000251869.1|SCARNA23	rs10486567;rs67152137;rs17156041;rs67152137;rs10486567;rs17156041;rs10486567;rs67152137;rs17156041;rs67152137;rs17156041;rs10486567;rs67152137;rs17156041;rs10486567;rs67152137;rs17156041;rs67152137;rs10486567;rs67152137;rs10486567;rs10486567;rs10486567;rs10486567;rs10486567
chr7-27983641-27984351	ENSG00000106052.9|TAX1BP1	rs11982766
chr7-47445534-47446294	ENSG00000221845.2|C7orf65	rs834601;rs700755
chr7-47481181-47481789	ENSG00000221845.2|C7orf65	rs11763044;rs13231464
chr7-97797538-97798347	ENSG00000239610.2|RN7SL13P	rs11762534
chr8-23430553-23431418	ENSG00000167034.9|NKX3-1,ENSG00000215298.3|FP15737	rs1810193
chr8-23438787-23439464	ENSG00000167034.9|NKX3-1,ENSG00000215298.3|FP15737	rs2928679
chr8-23500702-23503198	ENSG00000167034.9|NKX3-1,ENSG00000215298.3|FP15737	rs1398240;rs1398239;rs1398239;rs1398240;rs1398240;rs1398239;rs1398239;rs1398240;rs1398240;rs1398239;rs1398239;rs1398240;rs1398239;rs1398240;rs1398239;rs1398240;rs1398239;rs1398240;rs34703123;rs13256300;rs13256366;rs13256300;rs13256366;rs13256300;rs13256366
chr8-23528655-23530454	ENSG00000167034.9|NKX3-1,ENSG00000215298.3|FP15737	rs1160267;rs1160267;rs1160267;rs1160267;rs1160267;rs1160267;rs1160267;rs1160267
chr8-23537351-23539076	ENSG00000120889.8|TNFRSF10B,ENSG00000167034.9|NKX3-1,ENSG00000215298.3|FP15737,ENSG00000167034.9|NKX3-1,ENSG00000215298.3|FP15737	rs4872176;rs34783892;rs34783892;rs4872176;rs34783892;rs4872176;rs4872176;rs34783892;rs34783892;rs4872176;rs34783892;rs4872176;rs34783892;rs4872176;rs4872176;rs34783892;rs34783892
chr8-23543030-23543737	ENSG00000167034.9|NKX3-1,ENSG00000215298.3|FP15737	rs1866343
chr8-25893474-25894716	ENSG00000006652.9|IFRD1,ENSG00000266099.1|MIR5700,ENSG00000135541.16|AHI1,ENSG00000231028.4|LINC00271	rs141811748;rs141811748;rs141811748;rs141811748;rs141811748;rs141811748
chr8-128333148-128333764	ENSG00000256249.1|RP11-324E6.6	rs622856;rs622853
chr8-128341675-128343333	ENSG00000136997.10|MYC,ENSG00000249375.3|CASC11,ENSG00000256249.1|RP11-324E6.6,ENSG00000196917.4|HCAR1,ENSG00000256249.1|RP11-324E6.6,ENSG00000256249.1|RP11-324E6.6	rs35049703;rs35049703;rs35049703
chr8-128519287-128522580	ENSG00000136997.10|MYC,ENSG00000249375.3|CASC11,ENSG00000136997.10|MYC,ENSG00000249375.3|CASC11,ENSG00000256249.1|RP11-324E6.6,ENSG00000254223.1|RP11-419K12.1,ENSG00000256249.1|RP11-324E6.6	rs7812429;rs7812429;rs7812429;rs7812429;rs7812429;rs7812429;rs7812429;rs7812894;rs10099413;rs7814837;rs7814837;rs10099413;rs10099413;rs7814837;rs7814837;rs10099413;rs10099413;rs7814837;rs10099413;rs10099413;rs7814837
chr8-128530809-128533067	ENSG00000256249.1|RP11-324E6.6	rs71566637;rs11986220;rs11988857;rs10090154;rs10090154;rs11988857;rs11986220;rs71566637;rs71566637;rs11986220;rs11988857;rs11986220;rs71566637;rs71566637;rs11986220;rs11988857;rs10090154;rs71566637;rs11986220;rs11988857;rs11986220;rs71566637;rs71566637;rs11986220;rs11988857;rs10090154;rs11986220;rs71566637;rs11988857;rs10090154;rs11988857;rs11986220;rs71566637;rs71566637;rs11986220;rs11988857;rs7…
