# Supplementary material for: An AR-ERG transcriptional signature defined by long-range chromatin interactomes in prostate cancer cells
Source: HighWire-hosted journal article supplement (doi:10.1101/gr.230243.117), 2019-01-03
Supplement: Supplemental_Table_S12.xlsx [file Supplemental_Table_S12.xlsx]

## Sheet: GWASLoopGene
Table.S12: The enrichment statistics of gene sets annotations, using the target genes linked to prostate cancer GWAS SNPs through AR/ERG ChIA-PET looping.
Category	Term	Count	%	PValue	Genes	List Total	Pop Hits	Pop Total	Fold Enrichment	Bonferroni	Benjamini	FDR
SP_PIR_KEYWORDS	chromosomal rearrangement	14	5.9322	6.55531e-05	ENSG00000182185, ENSG00000136997, ENSG00000120008, ENSG00000173821, ENSG00000108821, ENSG00000172493, ENSG00000153814, ENSG00000124243, ENSG00000047936, ENSG00000110092, ENSG00000118689, ENSG00000047932, ENSG00000136848, ENSG00000115970	223	264	16396	3.89904	0.017673	0.017673	0.0862545
SP_PIR_KEYWORDS	Proto-oncogene	12	5.08475	0.000178731	ENSG00000153814, ENSG00000124243, ENSG00000136997, ENSG00000172927, ENSG00000120008, ENSG00000047936, ENSG00000110092, ENSG00000173821, ENSG00000118689, ENSG00000167085, ENSG00000128512, ENSG00000172493	223	216	16396	4.0847	0.0474562	0.0240165	0.235012
OMIM_DISEASE	Multiple newly identified loci associated with prostate cancer susceptibility	4	1.69492	0.000254163	ENSG00000146477, ENSG00000108753, ENSG00000142515, ENSG00000164715	57	7	2787	27.9398	0.0312749	0.0312749	0.293523
SP_PIR_KEYWORDS	phosphoprotein	119	50.4237	0.000498167	ENSG00000118690, ENSG00000170579, ENSG00000197081, ENSG00000140829, ENSG00000000419, ENSG00000184743, ENSG00000163785, ENSG00000073712, ENSG00000101868, ENSG00000063169, ENSG00000177311, ENSG00000134317, ENSG00000137166, ENSG00000106052, ENSG00000140830, ENSG00000108753, ENSG00000118689, ENSG00000115970, ENSG00000091138, ENSG00000115486, ENSG00000175003, ENSG00000140836, ENSG00000157423, ENSG0000…	223	6890	16396	1.26987	0.126751	0.044173	0.653764
BBID	61.Myc_network	4	1.69492	0.000527945	ENSG00000123933, ENSG00000136997, ENSG00000115758, ENSG00000177369	6	13	315	16.1538	0.00526692	0.00526692	0.316596
KEGG_PATHWAY	hsa05215:Prostate cancer	7	2.9661	0.000863202	ENSG00000146592, ENSG00000066468, ENSG00000167034, ENSG00000105851, ENSG00000110092, ENSG00000142515, ENSG00000112242	58	88	4400	6.03448	0.0675591	0.0675591	0.916117
GOTERM_BP_FAT	GO:0042127~regulation of cell proliferation	23	9.74576	0.00108671	ENSG00000064300, ENSG00000123933, ENSG00000066468, ENSG00000136997, ENSG00000115758, ENSG00000185950, ENSG00000068024, ENSG00000125398, ENSG00000175029, ENSG00000172201, ENSG00000080546, ENSG00000005020, ENSG00000136205, ENSG00000041515, ENSG00000167034, ENSG00000198625, ENSG00000147862, ENSG00000170477, ENSG00000110092, ENSG00000167085, ENSG00000172819, ENSG00000070193, ENSG00000112242	176	724	11767	2.12394	0.755646	0.755646	1.75898
UP_SEQ_FEATURE	zinc finger region:C2H2-type 9; atypical	3	1.27119	0.00177943	ENSG00000101493, ENSG00000101126, ENSG00000140836	223	5	16383	44.0798	0.757294	0.757294	2.69463
INTERPRO	IPR003054:Type II keratin	4	1.69492	0.00201357	ENSG00000185640, ENSG00000170477, ENSG00000172867, ENSG00000170421	208	18	14459	15.4476	0.594644	0.594644	2.81726
OMIM_DISEASE	Multiple loci identified in a genome-wide association study of prostate cancer	3	1.27119	0.00231895	ENSG00000153814, ENSG00000108753, ENSG00000175029	57	4	2787	36.6711	0.25189	0.135066	2.64905
UP_SEQ_FEATURE	site:Stutter	4	1.69492	0.00236018	ENSG00000185640, ENSG00000170477, ENSG00000172867, ENSG00000170421	223	20	16383	14.6933	0.84719	0.609091	3.55929
KEGG_PATHWAY	hsa05222:Small cell lung cancer	6	2.54237	0.00350209	ENSG00000136997, ENSG00000105851, ENSG00000110092, ENSG00000187498, ENSG00000091409, ENSG00000112242	58	80	4400	5.68966	0.247359	0.132451	3.66981
GOTERM_BP_FAT	GO:0008285~negative regulation of cell proliferation	13	5.50847	0.00401745	ENSG00000005020, ENSG00000123933, ENSG00000041515, ENSG00000167034, ENSG00000198625, ENSG00000147862, ENSG00000170477, ENSG00000068024, ENSG00000167085, ENSG00000172819, ENSG00000070193, ENSG00000175029, ENSG00000080546	176	332	11767	2.61793	0.994577	0.926359	6.35908
INTERPRO	IPR004749:Organic cation transport protein	3	1.27119	0.00539598	ENSG00000146477, ENSG00000112499, ENSG00000175003	208	8	14459	26.0679	0.911428	0.70239	7.38425
KEGG_PATHWAY	hsa05200:Pathways in cancer	11	4.66102	0.00629013	ENSG00000136997, ENSG00000066468, ENSG00000167034, ENSG00000105851, ENSG00000110092, ENSG00000142515, ENSG00000187498, ENSG00000070193, ENSG00000091409, ENSG00000175029, ENSG00000112242	58	314	4400	2.65759	0.40017	0.156647	6.50364
GOTERM_BP_FAT	GO:0010629~negative regulation of gene expression	15	6.35593	0.0104459	ENSG00000142655, ENSG00000136997, ENSG00000123933, ENSG00000068024, ENSG00000183955, ENSG00000125398, ENSG00000175029, ENSG00000172201, ENSG00000140836, ENSG00000153814, ENSG00000137166, ENSG00000198625, ENSG00000197114, ENSG00000167085, ENSG00000172819	176	470	11767	2.13376	0.999999	0.989288	15.7506
GOTERM_MF_FAT	GO:0030695~GTPase regulator activity	13	5.50847	0.0108653	ENSG00000102606, ENSG00000035499, ENSG00000153317, ENSG00000115648, ENSG00000057608, ENSG00000159842, ENSG00000106069, ENSG00000006607, ENSG00000203734, ENSG00000047932, ENSG00000136848, ENSG00000128512, ENSG00000011454	164	389	11269	2.29634	0.983374	0.983374	14.0107
GOTERM_BP_FAT	GO:0016481~negative regulation of transcription	14	5.9322	0.0111335	ENSG00000142655, ENSG00000123933, ENSG00000068024, ENSG00000183955, ENSG00000125398, ENSG00000175029, ENSG00000172201, ENSG00000140836, ENSG00000153814, ENSG00000137166, ENSG00000198625, ENSG00000197114, ENSG00000172819, ENSG00000167085	176	426	11767	2.19721	1	0.973417	16.701
GOTERM_MF_FAT	GO:0060589~nucleoside-triphosphatase regulator activity	13	5.50847	0.012846	ENSG00000102606, ENSG00000035499, ENSG00000153317, ENSG00000115648, ENSG00000057608, ENSG00000159842, ENSG00000106069, ENSG00000006607, ENSG00000203734, ENSG00000047932, ENSG00000136848, ENSG00000128512, ENSG00000011454	164	398	11269	2.24441	0.99216	0.911454	16.3596
UP_SEQ_FEATURE	short sequence motif:Di-lysine motif	3	1.27119	0.0129226	ENSG00000197977, ENSG00000121073, ENSG00000164181	223	13	16383	16.9538	0.999968	0.968153	18.0852
GOTERM_BP_FAT	GO:0055085~transmembrane transport	16	6.77966	0.0136526	ENSG00000146477, ENSG00000091138, ENSG00000142655, ENSG00000181045, ENSG00000147454, ENSG00000114120, ENSG00000160190, ENSG00000184209, ENSG00000112499, ENSG00000175003, ENSG00000115840, ENSG00000112337, ENSG00000001626, ENSG00000004846, ENSG00000026559, ENSG00000121073, ENSG00000177370	176	535	11767	1.99949	1	0.97165	20.0977
PIR_SUPERFAMILY	PIRSF002282:cytoskeletal keratin	4	1.69492	0.0136899	ENSG00000185640, ENSG00000170477, ENSG00000172867, ENSG00000170421	84	38	6241	7.8208	0.768033	0.768033	14.3308
GOTERM_MF_FAT	GO:0005083~small GTPase regulator activity	10	4.23729	0.0142099	ENSG00000159842, ENSG00000006607, ENSG00000102606, ENSG00000203734, ENSG00000047932, ENSG00000115648, ENSG00000153317, ENSG00000057608, ENSG00000128512, ENSG00000011454	164	263	11269	2.61268	0.995332	0.832869	17.9422
UP_SEQ_FEATURE	domain:PH	9	3.81356	0.0142949	ENSG00000005020, ENSG00000159842, ENSG00000102606, ENSG00000040199, ENSG00000185950, ENSG00000205356, ENSG00000136848, ENSG00000153317, ENSG00000073712	223	233	16383	2.83776	0.999989	0.942823	19.8145
UP_SEQ_FEATURE	compositionally biased region:Poly-Pro	12	5.08475	0.0147304	ENSG00000163746, ENSG00000063169, ENSG00000125520, ENSG00000185950, ENSG00000068615, ENSG00000125398, ENSG00000172201, ENSG00000164715, ENSG00000140836, ENSG00000172493, ENSG00000122574, ENSG00000140577	223	380	16383	2.31999	0.999992	0.905538	20.3563
GOTERM_CC_FAT	GO:0005624~membrane fraction	20	8.47458	0.0147817	ENSG00000146477, ENSG00000091138, ENSG00000133056, ENSG00000197977, ENSG00000115486, ENSG00000197081, ENSG00000000419, ENSG00000163785, ENSG00000112499, ENSG00000118640, ENSG00000175003, ENSG00000163110, ENSG00000041515, ENSG00000112337, ENSG00000047936, ENSG00000118689, ENSG00000047932, ENSG00000167080, ENSG00000121073, ENSG00000101246	160	766	10979	1.79161	0.966472	0.966472	17.3583
KEGG_PATHWAY	hsa05220:Chronic myeloid leukemia	5	2.11864	0.0148726	ENSG00000136997, ENSG00000105851, ENSG00000110092, ENSG00000175029, ENSG00000112242	58	74	4400	5.12582	0.702913	0.261721	14.7595
UP_SEQ_FEATURE	region of interest:Coil 2	4	1.69492	0.0156743	ENSG00000185640, ENSG00000170477, ENSG00000172867, ENSG00000170421	223	39	16383	7.53501	0.999996	0.876719	21.5185
UP_SEQ_FEATURE	region of interest:Linker 12	4	1.69492	0.0156743	ENSG00000185640, ENSG00000170477, ENSG00000172867, ENSG00000170421	223	39	16383	7.53501	0.999996	0.876719	21.5185
GOTERM_CC_FAT	GO:0045095~keratin filament	4	1.69492	0.0161551	ENSG00000185640, ENSG00000170477, ENSG00000172867, ENSG00000170421	160	37	10979	7.41824	0.975607	0.843816	18.8211
GOTERM_MF_FAT	GO:0015101~organic cation transmembrane transporter activity	3	1.27119	0.0168827	ENSG00000146477, ENSG00000112499, ENSG00000175003	164	14	11269	14.7243	0.998313	0.797349	20.9635
GOTERM_BP_FAT	GO:0048705~skeletal system morphogenesis	6	2.54237	0.0173058	ENSG00000136997, ENSG00000138696, ENSG00000163785, ENSG00000125398, ENSG00000005073, ENSG00000108821	176	101	11767	3.97176	1	0.976966	24.7932
GOTERM_BP_FAT	GO:0060350~endochondral bone morphogenesis	3	1.27119	0.0177963	ENSG00000125398, ENSG00000005073, ENSG00000108821	176	14	11767	14.3267	1	0.96401	25.4035
SP_PIR_KEYWORDS	GTPase activation	7	2.9661	0.0179626	ENSG00000159842, ENSG00000106069, ENSG00000035499, ENSG00000136848, ENSG00000153317, ENSG00000057608, ENSG00000011454	223	153	16396	3.36387	0.992775	0.708454	21.2266
UP_SEQ_FEATURE	compositionally biased region:Poly-Ser	13	5.50847	0.018029	ENSG00000168887, ENSG00000063169, ENSG00000006607, ENSG00000145934, ENSG00000136205, ENSG00000040199, ENSG00000125520, ENSG00000185950, ENSG00000205356, ENSG00000070193, ENSG00000005073, ENSG00000140836, ENSG00000172493	223	443	16383	2.1559	0.999999	0.873342	24.3491
SP_PIR_KEYWORDS	alternative splicing	112	47.4576	0.0180341	ENSG00000170579, ENSG00000186047, ENSG00000187498, ENSG00000184209, ENSG00000184743, ENSG00000163785, ENSG00000073712, ENSG00000140832, ENSG00000063169, ENSG00000134317, ENSG00000106052, ENSG00000108753, ENSG00000115970, ENSG00000101670, ENSG00000164651, ENSG00000172197, ENSG00000007129, ENSG00000175003, ENSG00000140836, ENSG00000157423, ENSG00000106069, ENSG00000203805, ENSG00000091409, ENSG0000…	223	7023	16396	1.17254	0.992917	0.628427	21.3021
SP_PIR_KEYWORDS	coiled coil	37	15.678	0.0192226	ENSG00000185640, ENSG00000163492, ENSG00000187498, ENSG00000183955, ENSG00000196586, ENSG00000172867, ENSG00000184743, ENSG00000118640, ENSG00000076356, ENSG00000155085, ENSG00000167100, ENSG00000106052, ENSG00000138162, ENSG00000141252, ENSG00000047932, ENSG00000139697, ENSG00000115970, ENSG00000011454, ENSG00000101752, ENSG00000151474, ENSG00000068024, ENSG00000115648, ENSG00000115761, ENSG0000…	223	1874	16396	1.45166	0.994905	0.58518	22.5467
KEGG_PATHWAY	hsa04512:ECM-receptor interaction	5	2.11864	0.0201205	ENSG00000189056, ENSG00000187498, ENSG00000091409, ENSG00000137809, ENSG00000108821	58	81	4400	4.68284	0.807254	0.280556	19.4762
GOTERM_CC_FAT	GO:0005626~insoluble fraction	20	8.47458	0.0205281	ENSG00000146477, ENSG00000091138, ENSG00000133056, ENSG00000197977, ENSG00000115486, ENSG00000197081, ENSG00000000419, ENSG00000163785, ENSG00000112499, ENSG00000118640, ENSG00000175003, ENSG00000163110, ENSG00000041515, ENSG00000112337, ENSG00000047936, ENSG00000118689, ENSG00000047932, ENSG00000167080, ENSG00000121073, ENSG00000101246	160	793	10979	1.73061	0.991166	0.793276	23.3213
GOTERM_BP_FAT	GO:0010558~negative regulation of macromolecule biosynthetic process	15	6.35593	0.0205619	ENSG00000142655, ENSG00000123933, ENSG00000068024, ENSG00000183955, ENSG00000125398, ENSG00000175029, ENSG00000172201, ENSG00000140836, ENSG00000153814, ENSG00000137166, ENSG00000159217, ENSG00000198625, ENSG00000197114, ENSG00000167085, ENSG00000172819	176	512	11767	1.95873	1	0.965464	28.7589
UP_SEQ_FEATURE	compositionally biased region:Poly-Leu	6	2.54237	0.022263	ENSG00000101868, ENSG00000159842, ENSG00000181523, ENSG00000127914, ENSG00000137809, ENSG00000115970	223	118	16383	3.73558	1	0.893263	29.2003
SP_PIR_KEYWORDS	keratin	4	1.69492	0.0228975	ENSG00000185640, ENSG00000170477, ENSG00000172867, ENSG00000170421	223	45	16396	6.53553	0.998165	0.593461	26.281
UP_SEQ_FEATURE	region of interest:Coil 1A	4	1.69492	0.0229445	ENSG00000185640, ENSG00000170477, ENSG00000172867, ENSG00000170421	223	45	16383	6.53034	1	0.871314	29.9534
UP_SEQ_FEATURE	region of interest:Coil 1B	4	1.69492	0.0229445	ENSG00000185640, ENSG00000170477, ENSG00000172867, ENSG00000170421	223	45	16383	6.53034	1	0.871314	29.9534
UP_SEQ_FEATURE	region of interest:Linker 1	4	1.69492	0.0229445	ENSG00000185640, ENSG00000170477, ENSG00000172867, ENSG00000170421	223	45	16383	6.53034	1	0.871314	29.9534
UP_SEQ_FEATURE	region of interest:Rod	4	1.69492	0.024306	ENSG00000185640, ENSG00000170477, ENSG00000172867, ENSG00000170421	223	46	16383	6.38838	1	0.858605	31.4356
GOTERM_BP_FAT	GO:0031327~negative regulation of cellular biosynthetic process	15	6.35593	0.0252086	ENSG00000142655, ENSG00000123933, ENSG00000068024, ENSG00000183955, ENSG00000125398, ENSG00000175029, ENSG00000172201, ENSG00000140836, ENSG00000153814, ENSG00000137166, ENSG00000159217, ENSG00000198625, ENSG00000197114, ENSG00000167085, ENSG00000172819	176	526	11767	1.9066	1	0.97469	34.0792
GOTERM_BP_FAT	GO:0045892~negative regulation of transcription, DNA-dependent	11	4.66102	0.0252274	ENSG00000153814, ENSG00000123933, ENSG00000142655, ENSG00000137166, ENSG00000198625, ENSG00000197114, ENSG00000068024, ENSG00000172819, ENSG00000125398, ENSG00000175029, ENSG00000140836	176	329	11767	2.23537	1	0.963535	34.0999
GOTERM_BP_FAT	GO:0008284~positive regulation of cell proliferation	12	5.08475	0.025277	ENSG00000064300, ENSG00000136997, ENSG00000066468, ENSG00000115758, ENSG00000136205, ENSG00000198625, ENSG00000185950, ENSG00000110092, ENSG00000068024, ENSG00000070193, ENSG00000112242, ENSG00000172201	176	377	11767	2.1281	1	0.951022	34.1547
UP_SEQ_FEATURE	domain:FERM	4	1.69492	0.0257103	ENSG00000172159, ENSG00000006607, ENSG00000151474, ENSG00000073712	223	47	16383	6.25246	1	0.847785	32.9336
UP_SEQ_FEATURE	zinc finger region:C2H2-type	4	1.69492	0.0257103	ENSG00000146592, ENSG00000137166, ENSG00000105879, ENSG00000125520	223	47	16383	6.25246	1	0.847785	32.9336
UP_SEQ_FEATURE	domain:SH3	7	2.9661	0.0257106	ENSG00000005020, ENSG00000111859, ENSG00000102606, ENSG00000150672, ENSG00000153317, ENSG00000128512, ENSG00000108798	223	166	16383	3.09798	1	0.821935	32.9339
GOTERM_BP_FAT	GO:0045596~negative regulation of cell differentiation	8	3.38983	0.0258727	ENSG00000064300, ENSG00000101752, ENSG00000110092, ENSG00000068024, ENSG00000070193, ENSG00000125398, ENSG00000172201, ENSG00000140836	176	194	11767	2.75703	1	0.941048	34.8084
GOTERM_BP_FAT	GO:0045934~negative regulation of nucleobase, nucleoside, nucleotide and nucleic acid metabolic process	14	5.9322	0.0261795	ENSG00000142655, ENSG00000123933, ENSG00000068024, ENSG00000183955, ENSG00000125398, ENSG00000175029, ENSG00000172201, ENSG00000140836, ENSG00000153814, ENSG00000137166, ENSG00000198625, ENSG00000197114, ENSG00000172819, ENSG00000167085	176	478	11767	1.95818	1	0.928971	35.1427
UP_SEQ_FEATURE	site:Breakpoint for translocation to form GOPC-ROS1 fusion protein	2	0.847458	0.0269185	ENSG00000047936, ENSG00000047932	223	2	16383	73.4664	1	0.811514	34.1978
UP_SEQ_FEATURE	region of interest:Head	4	1.69492	0.0271574	ENSG00000185640, ENSG00000170477, ENSG00000172867, ENSG00000170421	223	48	16383	6.1222	1	0.790593	34.4452
OMIM_DISEASE	Genome-wide association analysis of susceptibility and clinical phenotype in multiple sclerosis	4	1.69492	0.0273829	ENSG00000189056, ENSG00000197081, ENSG00000114120, ENSG00000118689	57	33	2787	5.92663	0.968902	0.68553	27.4632
KEGG_PATHWAY	hsa05213:Endometrial cancer	4	1.69492	0.0276803	ENSG00000136997, ENSG00000105851, ENSG00000110092, ENSG00000118689	58	51	4400	5.94997	0.897071	0.315422	25.8557
INTERPRO	IPR011993:Pleckstrin homology-type	10	4.23729	0.0278973	ENSG00000005020, ENSG00000172159, ENSG00000006607, ENSG00000136205, ENSG00000203734, ENSG00000151474, ENSG00000185950, ENSG00000153317, ENSG00000011454, ENSG00000073712	208	298	14459	2.3327	0.999997	0.985378	33.0449
INTERPRO	IPR019748:FERM central domain	4	1.69492	0.0279707	ENSG00000172159, ENSG00000006607, ENSG00000151474, ENSG00000073712	208	46	14459	6.04473	0.999997	0.958305	33.1166
INTERPRO	IPR016044:Filament	4	1.69492	0.0279707	ENSG00000185640, ENSG00000170477, ENSG00000172867, ENSG00000170421	208	46	14459	6.04473	0.999997	0.958305	33.1166
GOTERM_BP_FAT	GO:0051253~negative regulation of RNA metabolic process	11	4.66102	0.0281083	ENSG00000153814, ENSG00000123933, ENSG00000142655, ENSG00000137166, ENSG00000198625, ENSG00000197114, ENSG00000068024, ENSG00000172819, ENSG00000125398, ENSG00000175029, ENSG00000140836	176	335	11767	2.19534	1	0.928588	37.2078
GOTERM_BP_FAT	GO:0045893~positive regulation of transcription, DNA-dependent	13	5.50847	0.0282548	ENSG00000177311, ENSG00000146592, ENSG00000136997, ENSG00000108753, ENSG00000147862, ENSG00000101096, ENSG00000068024, ENSG00000118689, ENSG00000172819, ENSG00000196586, ENSG00000125398, ENSG00000112242, ENSG00000172493	176	433	11767	2.00728	1	0.915952	37.3622
GOTERM_BP_FAT	GO:0048608~reproductive structure development	6	2.54237	0.028463	ENSG00000102230, ENSG00000138696, ENSG00000167034, ENSG00000110092, ENSG00000118689, ENSG00000125398	176	115	11767	3.48824	1	0.903571	37.5808
GOTERM_BP_FAT	GO:0060349~bone morphogenesis	3	1.27119	0.0287834	ENSG00000125398, ENSG00000005073, ENSG00000108821	176	18	11767	11.143	1	0.892095	37.9159
GOTERM_BP_FAT	GO:0051172~negative regulation of nitrogen compound metabolic process	14	5.9322	0.0290031	ENSG00000142655, ENSG00000123933, ENSG00000068024, ENSG00000183955, ENSG00000125398, ENSG00000175029, ENSG00000172201, ENSG00000140836, ENSG00000153814, ENSG00000137166, ENSG00000198625, ENSG00000197114, ENSG00000172819, ENSG00000167085	176	485	11767	1.92992	1	0.879861	38.1448
KEGG_PATHWAY	hsa05223:Non-small cell lung cancer	4	1.69492	0.0291107	ENSG00000105851, ENSG00000110092, ENSG00000118689, ENSG00000112242	58	52	4400	5.83554	0.908642	0.289547	27.01
GOTERM_BP_FAT	GO:0051254~positive regulation of RNA metabolic process	13	5.50847	0.029136	ENSG00000177311, ENSG00000146592, ENSG00000136997, ENSG00000108753, ENSG00000147862, ENSG00000101096, ENSG00000068024, ENSG00000118689, ENSG00000172819, ENSG00000196586, ENSG00000125398, ENSG00000112242, ENSG00000172493	176	435	11767	1.99805	1	0.866934	38.2828
GOTERM_BP_FAT	GO:0009890~negative regulation of biosynthetic process	15	6.35593	0.0293776	ENSG00000142655, ENSG00000123933, ENSG00000068024, ENSG00000183955, ENSG00000125398, ENSG00000175029, ENSG00000172201, ENSG00000140836, ENSG00000153814, ENSG00000137166, ENSG00000159217, ENSG00000198625, ENSG00000197114, ENSG00000167085, ENSG00000172819	176	537	11767	1.86754	1	0.855169	38.533
INTERPRO	IPR018039:Intermediate filament protein, conserved site	4	1.69492	0.0295711	ENSG00000185640, ENSG00000170477, ENSG00000172867, ENSG00000170421	208	47	14459	5.91612	0.999999	0.932087	34.661
INTERPRO	IPR001664:Intermediate filament protein	4	1.69492	0.0295711	ENSG00000185640, ENSG00000170477, ENSG00000172867, ENSG00000170421	208	47	14459	5.91612	0.999999	0.932087	34.661
GOTERM_MF_FAT	GO:0016564~transcription repressor activity	10	4.23729	0.0308001	ENSG00000153814, ENSG00000123933, ENSG00000142655, ENSG00000137166, ENSG00000068024, ENSG00000167085, ENSG00000183955, ENSG00000175029, ENSG00000172201, ENSG00000140836	164	301	11269	2.28284	0.999992	0.90428	35.0957
SP_PIR_KEYWORDS	Intermediate filament	4	1.69492	0.0316904	ENSG00000185640, ENSG00000170477, ENSG00000172867, ENSG00000170421	223	51	16396	5.76664	0.999843	0.665433	34.5511
UP_SEQ_FEATURE	region of interest:Tail	4	1.69492	0.0317541	ENSG00000185640, ENSG00000170477, ENSG00000172867, ENSG00000170421	223	51	16383	5.76207	1	0.819182	39.0383
GOTERM_MF_FAT	GO:0005096~GTPase activator activity	8	3.38983	0.0321724	ENSG00000159842, ENSG00000106069, ENSG00000035499, ENSG00000136848, ENSG00000153317, ENSG00000057608, ENSG00000128512, ENSG00000011454	164	209	11269	2.63018	0.999995	0.870469	36.354
SP_PIR_KEYWORDS	myogenesis	3	1.27119	0.0323665	ENSG00000168899, ENSG00000111913, ENSG00000140836	223	21	16396	10.5035	0.99987	0.630043	35.1501
INTERPRO	IPR019749:Band 4.1 domain	4	1.69492	0.032914	ENSG00000172159, ENSG00000006607, ENSG00000151474, ENSG00000073712	208	49	14459	5.67465	1	0.917828	37.7807
INTERPRO	IPR019747:FERM conserved site	4	1.69492	0.032914	ENSG00000172159, ENSG00000006607, ENSG00000151474, ENSG00000073712	208	49	14459	5.67465	1	0.917828	37.7807
GOTERM_MF_FAT	GO:0030528~transcription regulator activity	29	12.2881	0.0343058	ENSG00000136997, ENSG00000142655, ENSG00000146592, ENSG00000183955, ENSG00000005073, ENSG00000153814, ENSG00000177311, ENSG00000137166, ENSG00000108753, ENSG00000147862, ENSG00000197114, ENSG00000101096, ENSG00000118689, ENSG00000172819, ENSG00000112242, ENSG00000168874, ENSG00000091138, ENSG00000123933, ENSG00000068024, ENSG00000127989, ENSG00000125398, ENSG00000172201, ENSG00000175029, ENSG0000…	164	1363	11269	1.46199	0.999998	0.845888	38.2653
KEGG_PATHWAY	hsa04510:Focal adhesion	7	2.9661	0.0380903	ENSG00000189056, ENSG00000105851, ENSG00000110092, ENSG00000187498, ENSG00000091409, ENSG00000137809, ENSG00000108821	58	194	4400	2.73729	0.956959	0.325107	33.8916
GOTERM_MF_FAT	GO:0043565~sequence-specific DNA binding	14	5.9322	0.0384494	ENSG00000136997, ENSG00000146592, ENSG00000068024, ENSG00000125398, ENSG00000005073, ENSG00000140836, ENSG00000137166, ENSG00000167034, ENSG00000108753, ENSG00000197114, ENSG00000101126, ENSG00000101096, ENSG00000118689, ENSG00000172819	164	520	11269	1.84998	1	0.840845	41.8264
GOTERM_CC_FAT	GO:0005654~nucleoplasm	20	8.47458	0.038998	ENSG00000068654, ENSG00000064300, ENSG00000136997, ENSG00000160049, ENSG00000179409, ENSG00000136982, ENSG00000068024, ENSG00000196586, ENSG00000175029, ENSG00000005073, ENSG00000140836, ENSG00000101868, ENSG00000153814, ENSG00000041515, ENSG00000108753, ENSG00000171206, ENSG00000110092, ENSG00000167085, ENSG00000172819, ENSG00000112242	160	852	10979	1.61077	0.999885	0.896418	39.9065
SMART	SM00295:B41	4	1.69492	0.0400493	ENSG00000172159, ENSG00000006607, ENSG00000151474, ENSG00000073712	127	49	8122	5.22063	0.992589	0.992589	37.4497
SP_PIR_KEYWORDS	lacrimo-auriculo-dento-digital syndrome	2	0.847458	0.0400746	ENSG00000066468, ENSG00000070193	223	3	16396	49.0164	0.999985	0.671254	41.6302
GOTERM_CC_FAT	GO:0019898~extrinsic to membrane	13	5.50847	0.0408168	ENSG00000172159, ENSG00000170579, ENSG00000151474, ENSG00000196586, ENSG00000057608, ENSG00000106069, ENSG00000164597, ENSG00000006607, ENSG00000040199, ENSG00000167083, ENSG00000141252, ENSG00000047932, ENSG00000128512	160	471	10979	1.89394	0.999925	0.850476	41.3465
INTERPRO	IPR001849:Pleckstrin homology	9	3.81356	0.0414889	ENSG00000005020, ENSG00000159842, ENSG00000006607, ENSG00000102606, ENSG00000185950, ENSG00000205356, ENSG00000136848, ENSG00000153317, ENSG00000073712	208	271	14459	2.3086	1	0.933593	45.1615
GOTERM_BP_FAT	GO:0015695~organic cation transport	3	1.27119	0.0418127	ENSG00000146477, ENSG00000112499, ENSG00000175003	176	22	11767	9.11699	1	0.928349	50.1984
UP_SEQ_FEATURE	splice variant	109	46.1864	0.0423346	ENSG00000170579, ENSG00000186047, ENSG00000187498, ENSG00000184209, ENSG00000184743, ENSG00000163785, ENSG00000073712, ENSG00000140832, ENSG00000063169, ENSG00000134317, ENSG00000106052, ENSG00000108753, ENSG00000115970, ENSG00000101670, ENSG00000164651, ENSG00000172197, ENSG00000007129, ENSG00000175003, ENSG00000140836, ENSG00000157423, ENSG00000203805, ENSG00000091409, ENSG00000115504, ENSG0000…	223	6999	16383	1.14414	1	0.883437	48.4927
GOTERM_CC_FAT	GO:0031981~nuclear lumen	29	12.2881	0.0424951	ENSG00000068654, ENSG00000064300, ENSG00000136997, ENSG00000179409, ENSG00000196586, ENSG00000005073, ENSG00000153814, ENSG00000101868, ENSG00000134317, ENSG00000137166, ENSG00000136205, ENSG00000041515, ENSG00000108753, ENSG00000147862, ENSG00000110092, ENSG00000172819, ENSG00000112242, ENSG00000005882, ENSG00000160049, ENSG00000136982, ENSG00000068024, ENSG00000115761, ENSG00000125398, ENSG0000…	160	1389	10979	1.43264	0.99995	0.807974	42.6469
GOTERM_BP_FAT	GO:0003002~regionalization	7	2.9661	0.0434619	ENSG00000101752, ENSG00000189056, ENSG00000138696, ENSG00000167034, ENSG00000108753, ENSG00000164651, ENSG00000005073	176	172	11767	2.72096	1	0.927023	51.5791
GOTERM_BP_FAT	GO:0035108~limb morphogenesis	5	2.11864	0.0450643	ENSG00000138696, ENSG00000164651, ENSG00000172819, ENSG00000070193, ENSG00000005073	176	90	11767	3.71433	1	0.925598	52.8862
GOTERM_BP_FAT	GO:0035107~appendage morphogenesis	5	2.11864	0.0450643	ENSG00000138696, ENSG00000164651, ENSG00000172819, ENSG00000070193, ENSG00000005073	176	90	11767	3.71433	1	0.925598	52.8862
GOTERM_BP_FAT	GO:0016055~Wnt receptor signaling pathway	6	2.54237	0.0458176	ENSG00000072803, ENSG00000110092, ENSG00000167693, ENSG00000172819, ENSG00000163785, ENSG00000147655	176	131	11767	3.0622	1	0.92055	53.4891
GOTERM_BP_FAT	GO:0030902~hindbrain development	4	1.69492	0.0461718	ENSG00000076356, ENSG00000041515, ENSG00000108753, ENSG00000147862	176	54	11767	4.95244	1	0.913755	53.7701
UP_SEQ_FEATURE	compositionally biased region:Poly-Lys	7	2.9661	0.0489604	ENSG00000101868, ENSG00000138162, ENSG00000035499, ENSG00000187008, ENSG00000164465, ENSG00000139697, ENSG00000115970	223	194	16383	2.65085	1	0.904399	53.6955
INTERPRO	IPR018980:FERM, C-terminal PH-like domain	3	1.27119	0.0493232	ENSG00000172159, ENSG00000006607, ENSG00000151474	208	25	14459	8.34173	1	0.941137	51.1852
INTERPRO	IPR019750:Band 4.1 subgroup	3	1.27119	0.0493232	ENSG00000172159, ENSG00000006607, ENSG00000151474	208	25	14459	8.34173	1	0.941137	51.1852
UP_SEQ_FEATURE	sequence variant	156	66.1017	0.0498044	ENSG00000118690, ENSG00000181523, ENSG00000170579, ENSG00000186047, ENSG00000197081, ENSG00000140829, ENSG00000187498, ENSG00000160190, ENSG00000000419, ENSG00000184209, ENSG00000163785, ENSG00000140832, ENSG00000101868, ENSG00000177311, ENSG00000063169, ENSG00000134317, ENSG00000137166, ENSG00000106052, ENSG00000108753, ENSG00000196917, ENSG00000124217, ENSG00000115970, ENSG00000101670, ENSG0000…	223	10547	16383	1.08664	1	0.895269	54.3217
GOTERM_BP_FAT	GO:0006644~phospholipid metabolic process	7	2.9661	0.0498842	ENSG00000101670, ENSG00000133056, ENSG00000102230, ENSG00000105851, ENSG00000101126, ENSG00000000419, ENSG00000172197	176	178	11767	2.62925	1	0.921973	56.6209
GOTERM_BP_FAT	GO:0048736~appendage development	5	2.11864	0.0514258	ENSG00000138696, ENSG00000164651, ENSG00000172819, ENSG00000070193, ENSG00000005073	176	94	11767	3.55627	1	0.920673	57.7555
GOTERM_BP_FAT	GO:0060173~limb development	5	2.11864	0.0514258	ENSG00000138696, ENSG00000164651, ENSG00000172819, ENSG00000070193, ENSG00000005073	176	94	11767	3.55627	1	0.920673	57.7555
UP_SEQ_FEATURE	domain:Leucine-zipper	5	2.11864	0.0514483	ENSG00000146592, ENSG00000136997, ENSG00000137166, ENSG00000179409, ENSG00000112242	223	103	16383	3.56633	1	0.890306	55.5189
SP_PIR_KEYWORDS	sh3 domain	7	2.9661	0.0528448	ENSG00000005020, ENSG00000111859, ENSG00000102606, ENSG00000150672, ENSG00000153317, ENSG00000128512, ENSG00000108798	223	198	16396	2.59936	1	0.738808	51.0642
UP_SEQ_FEATURE	region of interest:Interaction with GRB2	2	0.847458	0.0531155	ENSG00000203896, ENSG00000133056	223	4	16383	36.7332	1	0.885763	56.703
KEGG_PATHWAY	hsa05218:Melanoma	4	1.69492	0.0531391	ENSG00000105851, ENSG00000110092, ENSG00000070193, ENSG00000112242	58	66	4400	4.5977	0.988	0.388248	44.1177
GOTERM_MF_FAT	GO:0003714~transcription corepressor activity	6	2.54237	0.0537961	ENSG00000153814, ENSG00000123933, ENSG00000142655, ENSG00000183955, ENSG00000175029, ENSG00000172201	164	141	11269	2.92398	1	0.900146	53.422
GOTERM_BP_FAT	GO:0048598~embryonic morphogenesis	9	3.81356	0.0549715	ENSG00000136997, ENSG00000137166, ENSG00000101752, ENSG00000164651, ENSG00000172819, ENSG00000196586, ENSG00000070193, ENSG00000101246, ENSG00000005073	176	277	11767	2.17228	1	0.926979	60.2603
GOTERM_BP_FAT	GO:0007548~sex differentiation	6	2.54237	0.0550296	ENSG00000102230, ENSG00000138696, ENSG00000108753, ENSG00000110092, ENSG00000118689, ENSG00000125398	176	138	11767	2.90687	1	0.920302	60.3002
GOTERM_BP_FAT	GO:0045807~positive regulation of endocytosis	3	1.27119	0.0566123	ENSG00000105879, ENSG00000101752, ENSG00000070193	176	26	11767	7.71438	1	0.919348	61.3716
GOTERM_MF_FAT	GO:0004582~dolichyl-phosphate beta-D-mannosyltransferase activity	2	0.847458	0.056622	ENSG00000101126, ENSG00000000419	164	4	11269	34.3567	1	0.887613	55.3077
KEGG_PATHWAY	hsa04115:p53 signaling pathway	4	1.69492	0.0571638	ENSG00000198625, ENSG00000110092, ENSG00000120889, ENSG00000080546	58	68	4400	4.46247	0.991502	0.379226	46.5978
UP_SEQ_FEATURE	compositionally biased region:Poly-Gly	8	3.38983	0.0572718	ENSG00000063169, ENSG00000136997, ENSG00000185950, ENSG00000112242, ENSG00000120889, ENSG00000005073, ENSG00000140836, ENSG00000140577	223	253	16383	2.32305	1	0.892762	59.5279
SP_PIR_KEYWORDS	polymorphism	150	63.5593	0.0574137	ENSG00000118690, ENSG00000181523, ENSG00000170579, ENSG00000186047, ENSG00000197081, ENSG00000140829, ENSG00000187498, ENSG00000160190, ENSG00000184209, ENSG00000163785, ENSG00000140832, ENSG00000101868, ENSG00000177311, ENSG00000063169, ENSG00000134317, ENSG00000137166, ENSG00000106052, ENSG00000108753, ENSG00000196917, ENSG00000124217, ENSG00000115970, ENSG00000101670, ENSG00000185002, ENSG0000…	223	10135	16396	1.08818	1	0.738215	54.0819
GOTERM_BP_FAT	GO:0001547~antral ovarian follicle growth	2	0.847458	0.0581817	ENSG00000138696, ENSG00000118689	176	4	11767	33.429	1	0.918406	62.4072
GOTERM_BP_FAT	GO:0000320~re-entry into mitotic cell cycle	2	0.847458	0.0581817	ENSG00000198625, ENSG00000110092	176	4	11767	33.429	1	0.918406	62.4072
GOTERM_BP_FAT	GO:0019348~dolichol metabolic process	2	0.847458	0.0581817	ENSG00000101126, ENSG00000000419	176	4	11767	33.429	1	0.918406	62.4072
OMIM_DISEASE	LADD syndrome	2	0.847458	0.0590975	ENSG00000066468, ENSG00000070193	57	3	2787	32.5965	0.999507	0.850972	50.5613
INTERPRO	IPR001331:Guanine-nucleotide dissociation stimulator, CDC24, conserved site	4	1.69492	0.0591376	ENSG00000159842, ENSG00000006607, ENSG00000102606, ENSG00000203734	208	62	14459	4.4848	1	0.951895	57.8638
GOTERM_BP_FAT	GO:0019637~organophosphate metabolic process	7	2.9661	0.0592158	ENSG00000101670, ENSG00000133056, ENSG00000102230, ENSG00000105851, ENSG00000101126, ENSG00000000419, ENSG00000172197	176	186	11767	2.51616	1	0.915599	63.0752
SMART	SM00233:PH	9	3.81356	0.0594936	ENSG00000005020, ENSG00000159842, ENSG00000006607, ENSG00000102606, ENSG00000185950, ENSG00000205356, ENSG00000136848, ENSG00000153317, ENSG00000073712	127	271	8122	2.12389	0.999364	0.974782	50.5449
OMIM_DISEASE	Meta-analysis of genome-wide association data and large-scale replication identifies additional susceptibility loci for type 2 diabetes	3	1.27119	0.0597995	ENSG00000153814, ENSG00000145996, ENSG00000115970	57	20	2787	7.33421	0.999551	0.785952	50.9862
UP_SEQ_FEATURE	domain:DH	4	1.69492	0.0603236	ENSG00000159842, ENSG00000006607, ENSG00000102606, ENSG00000203734	223	66	16383	4.45251	1	0.894431	61.4914
GOTERM_MF_FAT	GO:0005548~phospholipid transporter activity	3	1.27119	0.0615104	ENSG00000163746, ENSG00000166377, ENSG00000054793	164	28	11269	7.36215	1	0.88516	58.4034
GOTERM_BP_FAT	GO:0007389~pattern specification process	8	3.38983	0.0616077	ENSG00000101752, ENSG00000189056, ENSG00000138696, ENSG00000167034, ENSG00000108753, ENSG00000164651, ENSG00000070193, ENSG00000005073	176	235	11767	2.27602	1	0.917688	64.578
GOTERM_BP_FAT	GO:0006928~cell motion	12	5.08475	0.0624811	ENSG00000076356, ENSG00000064300, ENSG00000102606, ENSG00000167642, ENSG00000189056, ENSG00000138696, ENSG00000136205, ENSG00000179242, ENSG00000172867, ENSG00000091409, ENSG00000137809, ENSG00000108798	176	438	11767	1.83172	1	0.914504	65.1123
GOTERM_BP_FAT	GO:0045944~positive regulation of transcription from RNA polymerase II promoter	10	4.23729	0.0636239	ENSG00000177311, ENSG00000136997, ENSG00000108753, ENSG00000147862, ENSG00000101096, ENSG00000068024, ENSG00000118689, ENSG00000172819, ENSG00000196586, ENSG00000125398	176	336	11767	1.98982	1	0.912331	65.8
GOTERM_BP_FAT	GO:0060284~regulation of cell development	7	2.9661	0.0642701	ENSG00000064300, ENSG00000101752, ENSG00000179242, ENSG00000068024, ENSG00000172201, ENSG00000005073, ENSG00000140836	176	190	11767	2.46319	1	0.908501	66.1831
GOTERM_BP_FAT	GO:0008406~gonad development	5	2.11864	0.065542	ENSG00000102230, ENSG00000138696, ENSG00000110092, ENSG00000118689, ENSG00000125398	176	102	11767	3.27735	1	0.906933	66.9256
GOTERM_MF_FAT	GO:0004714~transmembrane receptor protein tyrosine kinase activity	4	1.69492	0.0677632	ENSG00000066468, ENSG00000047936, ENSG00000197081, ENSG00000163785	164	65	11269	4.22852	1	0.888392	62.0734
INTERPRO	IPR018979:FERM, N-terminal	3	1.27119	0.0682968	ENSG00000172159, ENSG00000006607, ENSG00000151474	208	30	14459	6.95144	1	0.957963	63.3208
INTERPRO	IPR005829:Sugar transporter, conserved site	3	1.27119	0.0682968	ENSG00000146477, ENSG00000112499, ENSG00000175003	208	30	14459	6.95144	1	0.957963	63.3208
GOTERM_BP_FAT	GO:0051056~regulation of small GTPase mediated signal transduction	8	3.38983	0.06846	ENSG00000159842, ENSG00000006607, ENSG00000102606, ENSG00000189056, ENSG00000203734, ENSG00000136848, ENSG00000153317, ENSG00000011454	176	241	11767	2.21935	1	0.910955	68.5715
GOTERM_MF_FAT	GO:0003700~transcription factor activity	19	8.05085	0.0686583	ENSG00000146592, ENSG00000091138, ENSG00000136997, ENSG00000125398, ENSG00000005073, ENSG00000140836, ENSG00000172493, ENSG00000177311, ENSG00000137166, ENSG00000125520, ENSG00000167034, ENSG00000108753, ENSG00000147862, ENSG00000197114, ENSG00000101126, ENSG00000101096, ENSG00000118689, ENSG00000172819, ENSG00000112242	164	855	11269	1.52696	1	0.871497	62.5735
INTERPRO	IPR001452:Src homology-3 domain	7	2.9661	0.0691721	ENSG00000005020, ENSG00000111859, ENSG00000102606, ENSG00000150672, ENSG00000153317, ENSG00000128512, ENSG00000108798	208	201	14459	2.4209	1	0.946032	63.8064
GOTERM_BP_FAT	GO:0016093~polyprenol metabolic process	2	0.847458	0.0721933	ENSG00000101126, ENSG00000000419	176	5	11767	26.7432	1	0.917094	70.5654
GOTERM_BP_FAT	GO:0060351~cartilage development involved in endochondral bone morphogenesis	2	0.847458	0.0721933	ENSG00000005073, ENSG00000108821	176	5	11767	26.7432	1	0.917094	70.5654
GOTERM_BP_FAT	GO:0016090~prenol metabolic process	2	0.847458	0.0721933	ENSG00000101126, ENSG00000000419	176	5	11767	26.7432	1	0.917094	70.5654
INTERPRO	IPR000219:Dbl homology (DH) domain	4	1.69492	0.0737255	ENSG00000159842, ENSG00000006607, ENSG00000102606, ENSG00000203734	208	68	14459	4.08908	1	0.942683	66.2373
GOTERM_BP_FAT	GO:0006357~regulation of transcription from RNA polymerase II promoter	16	6.77966	0.0747841	ENSG00000136997, ENSG00000123933, ENSG00000068024, ENSG00000196586, ENSG00000125398, ENSG00000172201, ENSG00000140836, ENSG00000153814, ENSG00000177311, ENSG00000137166, ENSG00000108753, ENSG00000198625, ENSG00000147862, ENSG00000101096, ENSG00000118689, ENSG00000172819	176	671	11767	1.59423	1	0.919411	71.8786
GOTERM_MF_FAT	GO:0005275~amine transmembrane transporter activity	4	1.69492	0.0753982	ENSG00000146477, ENSG00000115840, ENSG00000123643, ENSG00000112499	164	68	11269	4.04197	1	0.877518	66.1471
GOTERM_BP_FAT	GO:0035295~tube development	7	2.9661	0.0755437	ENSG00000101752, ENSG00000136205, ENSG00000167034, ENSG00000147862, ENSG00000001626, ENSG00000070193, ENSG00000005073	176	198	11767	2.36367	1	0.916502	72.2531
PIR_SUPERFAMILY	PIRSF005409:Synaptobrevin_euk	2	0.847458	0.0772184	ENSG00000168899, ENSG00000118640	84	6	6241	24.7659	0.9998	0.985867	59.4142
SP_PIR_KEYWORDS	guanine-nucleotide releasing factor	5	2.11864	0.0783426	ENSG00000159842, ENSG00000006607, ENSG00000102606, ENSG00000203734, ENSG00000128512	223	119	16396	3.08927	1	0.81858	65.8319
UP_SEQ_FEATURE	zinc finger region:C2H2-type 5; atypical	2	0.847458	0.0786103	ENSG00000101126, ENSG00000140836	223	6	16383	24.4888	1	0.940983	71.5126
GOTERM_BP_FAT	GO:0045941~positive regulation of transcription	13	5.50847	0.0799372	ENSG00000177311, ENSG00000146592, ENSG00000136997, ENSG00000108753, ENSG00000147862, ENSG00000101096, ENSG00000068024, ENSG00000118689, ENSG00000172819, ENSG00000196586, ENSG00000125398, ENSG00000112242, ENSG00000172493	176	512	11767	1.69757	1	0.923527	74.3287
GOTERM_BP_FAT	GO:0051216~cartilage development	4	1.69492	0.0804674	ENSG00000138696, ENSG00000125398, ENSG00000005073, ENSG00000108821	176	68	11767	3.93282	1	0.920213	74.5691
GOTERM_BP_FAT	GO:0006650~glycerophospholipid metabolic process	5	2.11864	0.0814697	ENSG00000133056, ENSG00000102230, ENSG00000105851, ENSG00000101126, ENSG00000000419	176	110	11767	3.039	1	0.918166	75.0178
GOTERM_MF_FAT	GO:0015103~inorganic anion transmembrane transporter activity	3	1.27119	0.0820333	ENSG00000091138, ENSG00000181045, ENSG00000112337	164	33	11269	6.24667	1	0.882328	69.3536
INTERPRO	IPR016444:Synaptobrevin, metazoa/fungi	2	0.847458	0.0828956	ENSG00000168899, ENSG00000118640	208	6	14459	23.1715	1	0.949313	70.6792
INTERPRO	IPR002076:GNS1/SUR4 membrane protein	2	0.847458	0.0828956	ENSG00000197977, ENSG00000164181	208	6	14459	23.1715	1	0.949313	70.6792
SP_PIR_KEYWORDS	mitochondrion inner membrane	6	2.54237	0.0831132	ENSG00000115840, ENSG00000147454, ENSG00000114120, ENSG00000167085, ENSG00000102967, ENSG00000177370	223	171	16396	2.57981	1	0.814711	68.088
GOTERM_BP_FAT	GO:0030384~phosphoinositide metabolic process	4	1.69492	0.0832467	ENSG00000133056, ENSG00000105851, ENSG00000101126, ENSG00000000419	176	69	11767	3.87582	1	0.918178	75.795
GOTERM_MF_FAT	GO:0008047~enzyme activator activity	9	3.81356	0.088052	ENSG00000159842, ENSG00000106069, ENSG00000035499, ENSG00000136848, ENSG00000153317, ENSG00000057608, ENSG00000128512, ENSG00000120889, ENSG00000011454	164	316	11269	1.95703	1	0.884708	72.0162
GOTERM_BP_FAT	GO:0010605~negative regulation of macromolecule metabolic process	16	6.77966	0.0880561	ENSG00000123933, ENSG00000142655, ENSG00000136997, ENSG00000068024, ENSG00000183955, ENSG00000125398, ENSG00000175029, ENSG00000172201, ENSG00000140836, ENSG00000153814, ENSG00000137166, ENSG00000159217, ENSG00000198625, ENSG00000197114, ENSG00000167085, ENSG00000172819	176	688	11767	1.55484	1	0.925502	77.7863
SMART	SM00325:RhoGEF	4	1.69492	0.0884522	ENSG00000159842, ENSG00000006607, ENSG00000102606, ENSG00000203734	127	68	8122	3.76193	0.999985	0.975386	65.4622
GOTERM_MF_FAT	GO:0005089~Rho guanyl-nucleotide exchange factor activity	4	1.69492	0.0889218	ENSG00000159842, ENSG00000006607, ENSG00000102606, ENSG00000203734	164	73	11269	3.76512	1	0.871813	72.3828
UP_SEQ_FEATURE	zinc finger region:C2H2-type 8; atypical	2	0.847458	0.0911003	ENSG00000101126, ENSG00000140836	223	7	16383	20.9904	1	0.957749	76.893
GOTERM_BP_FAT	GO:0010628~positive regulation of gene expression	13	5.50847	0.0920765	ENSG00000177311, ENSG00000146592, ENSG00000136997, ENSG00000108753, ENSG00000147862, ENSG00000101096, ENSG00000068024, ENSG00000118689, ENSG00000172819, ENSG00000196586, ENSG00000125398, ENSG00000112242, ENSG00000172493	176	525	11767	1.65553	1	0.9303	79.3318
SMART	SM00326:SH3	7	2.9661	0.092121	ENSG00000005020, ENSG00000111859, ENSG00000102606, ENSG00000150672, ENSG00000153317, ENSG00000128512, ENSG00000108798	127	201	8122	2.22721	0.999991	0.94494	67.0246
UP_SEQ_FEATURE	topological domain:Vesicular	3	1.27119	0.0935548	ENSG00000168899, ENSG00000170743, ENSG00000118640	223	38	16383	5.79998	1	0.955999	77.8318
GOTERM_CC_FAT	GO:0000267~cell fraction	21	8.89831	0.0957057	ENSG00000146477, ENSG00000091138, ENSG00000133056, ENSG00000197977, ENSG00000115486, ENSG00000197081, ENSG00000000419, ENSG00000163785, ENSG00000112499, ENSG00000118640, ENSG00000175003, ENSG00000163110, ENSG00000167642, ENSG00000041515, ENSG00000112337, ENSG00000047936, ENSG00000118689, ENSG00000047932, ENSG00000167080, ENSG00000121073, ENSG00000101246	160	1014	10979	1.4211	1	0.962247	72.4162
INTERPRO	IPR000341:Phosphoinositide 3-kinase, ras-binding	2	0.847458	0.0960306	ENSG00000133056, ENSG00000105851	208	7	14459	19.8613	1	0.960471	76.1026
GOTERM_BP_FAT	GO:0045137~development of primary sexual characteristics	5	2.11864	0.0968281	ENSG00000102230, ENSG00000138696, ENSG00000110092, ENSG00000118689, ENSG00000125398	176	117	11767	2.85718	1	0.936056	81.0282
KEGG_PATHWAY	hsa05219:Bladder cancer	3	1.27119	0.0981151	ENSG00000136997, ENSG00000110092, ENSG00000112242	58	41	4400	5.55088	0.999767	0.532535	66.7317
GOTERM_CC_FAT	GO:0005886~plasma membrane	53	22.4576	0.0982987	ENSG00000066468, ENSG00000111859, ENSG00000138696, ENSG00000170579, ENSG00000181045, ENSG00000197081, ENSG00000184209, ENSG00000163785, ENSG00000150672, ENSG00000112499, ENSG00000073712, ENSG00000163746, ENSG00000196917, ENSG00000120903, ENSG00000146477, ENSG00000091138, ENSG00000179242, ENSG00000123643, ENSG00000187871, ENSG00000166747, ENSG00000108821, ENSG00000175003, ENSG00000168899, ENSG0000…	160	3053	10979	1.19122	1	0.947605	73.4118
COG_ONTOLOGY	Transcription	3	1.27119	0.100296	ENSG00000137166, ENSG00000068784, ENSG00000140836	23	45	1828	5.29855	0.746898	0.746898	50.328
GOTERM_BP_FAT	GO:0048589~developmental growth	4	1.69492	0.100759	ENSG00000138696, ENSG00000118689, ENSG00000070193, ENSG00000005073	176	75	11767	3.56576	1	0.939735	82.332
INTERPRO	IPR011701:Major facilitator superfamily MFS-1	4	1.69492	0.101161	ENSG00000146477, ENSG00000112337, ENSG00000160190, ENSG00000175003	208	78	14459	3.56484	1	0.958635	77.9552
GOTERM_CC_FAT	GO:0005882~intermediate filament	4	1.69492	0.10365	ENSG00000185640, ENSG00000170477, ENSG00000172867, ENSG00000170421	160	78	10979	3.51891	1	0.937468	75.3627
SMART	SM00144:PI3K_rbd	2	0.847458	0.103705	ENSG00000133056, ENSG00000105851	127	7	8122	18.2722	0.999998	0.927753	71.5443
GOTERM_MF_FAT	GO:0016563~transcription activator activity	10	4.23729	0.103814	ENSG00000167034, ENSG00000108753, ENSG00000147862, ENSG00000101096, ENSG00000068024, ENSG00000118689, ENSG00000167085, ENSG00000125398, ENSG00000112242, ENSG00000172493	164	383	11269	1.79408	1	0.898072	78.0071
GOTERM_BP_FAT	GO:0010557~positive regulation of macromolecule biosynthetic process	14	5.9322	0.104198	ENSG00000177311, ENSG00000146592, ENSG00000136997, ENSG00000108753, ENSG00000147862, ENSG00000185950, ENSG00000101096, ENSG00000068024, ENSG00000118689, ENSG00000172819, ENSG00000196586, ENSG00000125398, ENSG00000112242, ENSG00000172493	176	593	11767	1.57843	1	0.942279	83.403
INTERPRO	IPR002420:Phosphoinositide 3-kinase, C2	2	0.847458	0.108978	ENSG00000133056, ENSG00000105851	208	8	14459	17.3786	1	0.960475	80.5232
GOTERM_BP_FAT	GO:0001541~ovarian follicle development	3	1.27119	0.109267	ENSG00000102230, ENSG00000138696, ENSG00000118689	176	38	11767	5.27826	1	0.947155	84.8711
GOTERM_CC_FAT	GO:0030136~clathrin-coated vesicle	5	2.11864	0.11019	ENSG00000197081, ENSG00000170743, ENSG00000047932, ENSG00000196586, ENSG00000166747	160	126	10979	2.72297	1	0.93018	77.5675
UP_SEQ_FEATURE	short sequence motif:Nuclear export signal	3	1.27119	0.110701	ENSG00000125520, ENSG00000101096, ENSG00000068024	223	42	16383	5.2476	1	0.972328	83.4603
GOTERM_CC_FAT	GO:0045111~intermediate filament cytoskeleton	4	1.69492	0.112766	ENSG00000185640, ENSG00000170477, ENSG00000172867, ENSG00000170421	160	81	10979	3.38858	1	0.916252	78.3848
KEGG_PATHWAY	hsa04810:Regulation of actin cytoskeleton	6	2.54237	0.113491	ENSG00000066468, ENSG00000102606, ENSG00000105851, ENSG00000070193, ENSG00000091409, ENSG00000137809	58	199	4400	2.2873	0.999942	0.556533	72.3024
GOTERM_CC_FAT	GO:0017053~transcriptional repressor complex	3	1.27119	0.113861	ENSG00000153814, ENSG00000068024, ENSG00000175029	160	40	10979	5.14641	1	0.899416	78.7241
OMIM_DISEASE	Prostate cancer, susceptibility to	2	0.847458	0.114761	ENSG00000108753, ENSG00000140836	57	6	2787	16.2982	1	0.921097	75.5769
KEGG_PATHWAY	hsa04310:Wnt signaling pathway	5	2.11864	0.117148	ENSG00000136997, ENSG00000072803, ENSG00000101096, ENSG00000110092, ENSG00000175029	58	145	4400	2.61593	0.999959	0.539913	73.4961
UP_SEQ_FEATURE	domain:Helix-loop-helix motif	4	1.69492	0.117206	ENSG00000168874, ENSG00000123933, ENSG00000136997, ENSG00000172201	223	88	16383	3.33938	1	0.97454	85.2218
SMART	SM00142:PI3K_C2	2	0.847458	0.117622	ENSG00000133056, ENSG00000105851	127	8	8122	15.9882	1	0.918135	76.2232
UP_SEQ_FEATURE	compositionally biased region:Pro-rich	17	7.20339	0.117996	ENSG00000168874, ENSG00000105879, ENSG00000133056, ENSG00000168769, ENSG00000153317, ENSG00000168743, ENSG00000140832, ENSG00000167105, ENSG00000006607, ENSG00000198740, ENSG00000041515, ENSG00000152292, ENSG00000138162, ENSG00000136848, ENSG00000128512, ENSG00000163874, ENSG00000108798	223	853	16383	1.46416	1	0.971702	85.4232
GOTERM_BP_FAT	GO:0048193~Golgi vesicle transport	5	2.11864	0.118403	ENSG00000164597, ENSG00000047932, ENSG00000184743, ENSG00000118640, ENSG00000166747	176	126	11767	2.65309	1	0.956752	87.2141
GOTERM_BP_FAT	GO:0007162~negative regulation of cell adhesion	3	1.27119	0.118974	ENSG00000105879, ENSG00000167080, ENSG00000108821	176	40	11767	5.01435	1	0.954834	87.3488
INTERPRO	IPR001263:Phosphoinositide 3-kinase accessory region PIK	2	0.847458	0.121742	ENSG00000133056, ENSG00000105851	208	9	14459	15.4476	1	0.96732	84.1262
INTERPRO	IPR015433:Phosphatidylinositol Kinase	2	0.847458	0.121742	ENSG00000133056, ENSG00000105851	208	9	14459	15.4476	1	0.96732	84.1262
INTERPRO	IPR014352:FERM/acyl-CoA-binding protein, 3-helical bundle	3	1.27119	0.125933	ENSG00000172159, ENSG00000006607, ENSG00000151474	208	43	14459	4.84984	1	0.964915	85.1671
GOTERM_BP_FAT	GO:0008544~epidermis development	5	2.11864	0.126023	ENSG00000064300, ENSG00000172867, ENSG00000070193, ENSG00000125398, ENSG00000108821	176	129	11767	2.59139	1	0.960554	88.9033
UP_SEQ_FEATURE	domain:v-SNARE coiled-coil homology	2	0.847458	0.127568	ENSG00000168899, ENSG00000118640	223	10	16383	14.6933	1	0.976274	87.6696
GOTERM_MF_FAT	GO:0005088~Ras guanyl-nucleotide exchange factor activity	4	1.69492	0.128281	ENSG00000159842, ENSG00000006607, ENSG00000102606, ENSG00000203734	164	86	11269	3.19597	1	0.933439	84.9968
GOTERM_BP_FAT	GO:0031328~positive regulation of cellular biosynthetic process	14	5.9322	0.128729	ENSG00000177311, ENSG00000146592, ENSG00000136997, ENSG00000108753, ENSG00000147862, ENSG00000185950, ENSG00000101096, ENSG00000068024, ENSG00000118689, ENSG00000172819, ENSG00000196586, ENSG00000125398, ENSG00000112242, ENSG00000172493	176	616	11767	1.5195	1	0.961114	89.451
SP_PIR_KEYWORDS	dna-binding	29	12.2881	0.128761	ENSG00000182185, ENSG00000136997, ENSG00000146592, ENSG00000005073, ENSG00000101868, ENSG00000177311, ENSG00000134317, ENSG00000137166, ENSG00000108753, ENSG00000147862, ENSG00000197114, ENSG00000101096, ENSG00000118689, ENSG00000172819, ENSG00000112242, ENSG00000168874, ENSG00000185002, ENSG00000123933, ENSG00000020256, ENSG00000136982, ENSG00000164651, ENSG00000127989, ENSG00000125398, ENSG0000…	223	1656	16396	1.28757	1	0.917872	83.7064
INTERPRO	IPR001092:Basic helix-loop-helix dimerisation region bHLH	4	1.69492	0.128788	ENSG00000168874, ENSG00000123933, ENSG00000136997, ENSG00000172201	208	87	14459	3.19607	1	0.961258	85.8396
SMART	SM00145:PI3Ka	2	0.847458	0.131324	ENSG00000133056, ENSG00000105851	127	9	8122	14.2117	1	0.910495	80.1331
GOTERM_BP_FAT	GO:0008283~cell proliferation	10	4.23729	0.131948	ENSG00000101670, ENSG00000101868, ENSG00000136997, ENSG00000108753, ENSG00000198625, ENSG00000138162, ENSG00000185950, ENSG00000172867, ENSG00000070193, ENSG00000172201	176	393	11767	1.70122	1	0.962175	90.0694
SP_PIR_KEYWORDS	tyrosine-specific protein kinase	3	1.27119	0.132989	ENSG00000066468, ENSG00000047936, ENSG00000163785	223	47	16396	4.69306	1	0.911608	84.7172
GOTERM_BP_FAT	GO:0045935~positive regulation of nucleobase, nucleoside, nucleotide and nucleic acid metabolic process	13	5.50847	0.133744	ENSG00000177311, ENSG00000146592, ENSG00000136997, ENSG00000108753, ENSG00000147862, ENSG00000101096, ENSG00000068024, ENSG00000118689, ENSG00000172819, ENSG00000196586, ENSG00000125398, ENSG00000112242, ENSG00000172493	176	563	11767	1.54379	1	0.961781	90.3995
INTERPRO	IPR001388:Synaptobrevin	2	0.847458	0.134323	ENSG00000168899, ENSG00000118640	208	10	14459	13.9029	1	0.960484	87.0629
INTERPRO	IPR018045:Sulphate anion transporter, conserved site	2	0.847458	0.134323	ENSG00000091138, ENSG00000181045	208	10	14459	13.9029	1	0.960484	87.0629
SP_PIR_KEYWORDS	golgi apparatus	12	5.08475	0.134736	ENSG00000168899, ENSG00000111859, ENSG00000164597, ENSG00000127914, ENSG00000181045, ENSG00000139832, ENSG00000141252, ENSG00000047932, ENSG00000167080, ENSG00000196586, ENSG00000101246, ENSG00000166747	223	556	16396	1.58686	1	0.901286	85.1175
GOTERM_MF_FAT	GO:0008271~secondary active sulfate transmembrane transporter activity	2	0.847458	0.135634	ENSG00000091138, ENSG00000181045	164	10	11269	13.7427	1	0.934976	86.6541
GOTERM_MF_FAT	GO:0016303~1-phosphatidylinositol-3-kinase activity	2	0.847458	0.135634	ENSG00000133056, ENSG00000105851	164	10	11269	13.7427	1	0.934976	86.6541
SP_PIR_KEYWORDS	membrane	81	34.322	0.136433	ENSG00000066468, ENSG00000138696, ENSG00000170579, ENSG00000165406, ENSG00000181045, ENSG00000197081, ENSG00000114120, ENSG00000160190, ENSG00000184209, ENSG00000184743, ENSG00000163785, ENSG00000150672, ENSG00000118640, ENSG00000112499, ENSG00000166377, ENSG00000163746, ENSG00000140832, ENSG00000196917, ENSG00000120903, ENSG00000164181, ENSG00000146477, ENSG00000091138, ENSG00000179242, ENSG0000…	223	5310	16396	1.12156	1	0.891016	85.4972
SP_PIR_KEYWORDS	cell projection	6	2.54237	0.137946	ENSG00000111859, ENSG00000159217, ENSG00000175764, ENSG00000111913, ENSG00000047932, ENSG00000196586	223	201	16396	2.19477	1	0.880568	85.8282
SP_PIR_KEYWORDS	synapse	6	2.54237	0.137946	ENSG00000170579, ENSG00000170743, ENSG00000120903, ENSG00000150672, ENSG00000047932, ENSG00000175029	223	201	16396	2.19477	1	0.880568	85.8282
GOTERM_BP_FAT	GO:0021543~pallium development	3	1.27119	0.138985	ENSG00000189056, ENSG00000138162, ENSG00000172201	176	44	11767	4.5585	1	0.964696	91.3049
GOTERM_BP_FAT	GO:0050673~epithelial cell proliferation	2	0.847458	0.139202	ENSG00000108753, ENSG00000070193	176	10	11767	13.3716	1	0.962844	91.3406
GOTERM_BP_FAT	GO:0043616~keratinocyte proliferation	2	0.847458	0.139202	ENSG00000172867, ENSG00000070193	176	10	11767	13.3716	1	0.962844	91.3406
SP_PIR_KEYWORDS	cell junction	9	3.81356	0.139287	ENSG00000111859, ENSG00000170579, ENSG00000136205, ENSG00000170743, ENSG00000120903, ENSG00000150672, ENSG00000047932, ENSG00000175029, ENSG00000073712	223	376	16396	1.7599	1	0.86996	86.1155
UP_SEQ_FEATURE	domain:STAS	2	0.847458	0.139397	ENSG00000091138, ENSG00000181045	223	11	16383	13.3575	1	0.981281	89.999
GOTERM_BP_FAT	GO:0009891~positive regulation of biosynthetic process	14	5.9322	0.140342	ENSG00000177311, ENSG00000146592, ENSG00000136997, ENSG00000108753, ENSG00000147862, ENSG00000185950, ENSG00000101096, ENSG00000068024, ENSG00000118689, ENSG00000172819, ENSG00000196586, ENSG00000125398, ENSG00000112242, ENSG00000172493	176	626	11767	1.49523	1	0.961855	91.5257
INTERPRO	IPR000299:FERM domain	3	1.27119	0.140488	ENSG00000172159, ENSG00000006607, ENSG00000151474	208	46	14459	4.53355	1	0.960429	88.3096
GOTERM_CC_FAT	GO:0005794~Golgi apparatus	17	7.20339	0.141595	ENSG00000042832, ENSG00000111859, ENSG00000139832, ENSG00000181045, ENSG00000197081, ENSG00000196586, ENSG00000166747, ENSG00000118640, ENSG00000057608, ENSG00000168899, ENSG00000134317, ENSG00000164597, ENSG00000127914, ENSG00000141252, ENSG00000047932, ENSG00000167080, ENSG00000101246	160	825	10979	1.41396	1	0.931283	85.8391
GOTERM_BP_FAT	GO:0003006~reproductive developmental process	7	2.9661	0.142131	ENSG00000102230, ENSG00000138696, ENSG00000167034, ENSG00000108753, ENSG00000110092, ENSG00000118689, ENSG00000125398	176	237	11767	1.97471	1	0.9615	91.8091
UP_SEQ_FEATURE	repeat:Solcar 3	3	1.27119	0.142412	ENSG00000115840, ENSG00000147454, ENSG00000114120	223	49	16383	4.49794	1	0.98055	90.5231
GOTERM_BP_FAT	GO:0001708~cell fate specification	3	1.27119	0.144097	ENSG00000070193, ENSG00000125398, ENSG00000005073	176	45	11767	4.4572	1	0.961323	92.1102
GOTERM_MF_FAT	GO:0008201~heparin binding	4	1.69492	0.144822	ENSG00000101670, ENSG00000066468, ENSG00000070193, ENSG00000147655	164	91	11269	3.02037	1	0.938804	88.486
BIOCARTA	h_ptenPathway:PTEN dependent cell cycle arrest and apoptosis	2	0.847458	0.145959	ENSG00000005882, ENSG00000118689	13	17	1307	11.8281	0.996586	0.996586	75.5184
GOTERM_BP_FAT	GO:0030324~lung development	4	1.69492	0.146554	ENSG00000136205, ENSG00000147862, ENSG00000001626, ENSG00000070193	176	89	11767	3.00485	1	0.961612	92.4717
INTERPRO	IPR011547:Sulphate transporter	2	0.847458	0.146725	ENSG00000091138, ENSG00000181045	208	11	14459	12.639	1	0.960488	89.4565
INTERPRO	IPR002645:Sulphate transporter/antisigma-factor antagonist STAS	2	0.847458	0.146725	ENSG00000091138, ENSG00000181045	208	11	14459	12.639	1	0.960488	89.4565
GOTERM_MF_FAT	GO:0048407~platelet-derived growth factor binding	2	0.847458	0.148148	ENSG00000187498, ENSG00000108821	164	11	11269	12.4933	1	0.934983	89.0896
GOTERM_MF_FAT	GO:0035004~phosphoinositide 3-kinase activity	2	0.847458	0.148148	ENSG00000133056, ENSG00000105851	164	11	11269	12.4933	1	0.934983	89.0896
GOTERM_CC_FAT	GO:0005942~phosphoinositide 3-kinase complex	2	0.847458	0.148318	ENSG00000133056, ENSG00000105851	160	11	10979	12.4761	1	0.926799	87.1952
GOTERM_CC_FAT	GO:0044451~nucleoplasm part	12	5.08475	0.150399	ENSG00000153814, ENSG00000136997, ENSG00000108753, ENSG00000171206, ENSG00000179409, ENSG00000068024, ENSG00000172819, ENSG00000196586, ENSG00000175029, ENSG00000112242, ENSG00000005073, ENSG00000140836	160	533	10979	1.54489	1	0.916041	87.59
UP_SEQ_FEATURE	zinc finger region:B box-type 1	2	0.847458	0.151067	ENSG00000100505, ENSG00000171206	223	12	16383	12.2444	1	0.982902	91.8884
GOTERM_BP_FAT	GO:0001759~induction of an organ	2	0.847458	0.152015	ENSG00000070193, ENSG00000005073	176	11	11767	12.156	1	0.96453	93.2206
SMART	SM00353:HLH	4	1.69492	0.152409	ENSG00000168874, ENSG00000123933, ENSG00000136997, ENSG00000172201	127	87	8122	2.94036	1	0.916287	85.016
GOTERM_BP_FAT	GO:0060627~regulation of vesicle-mediated transport	4	1.69492	0.15358	ENSG00000105879, ENSG00000101752, ENSG00000047932, ENSG00000070193	176	91	11767	2.93881	1	0.96401	93.4219
KEGG_PATHWAY	hsa05221:Acute myeloid leukemia	3	1.27119	0.154274	ENSG00000136997, ENSG00000105851, ENSG00000110092	58	54	4400	4.21456	0.999999	0.62071	83.2328
UP_SEQ_FEATURE	repeat:Solcar 2	3	1.27119	0.156533	ENSG00000115840, ENSG00000147454, ENSG00000114120	223	52	16383	4.23844	1	0.983446	92.6536
UP_SEQ_FEATURE	repeat:Solcar 1	3	1.27119	0.156533	ENSG00000115840, ENSG00000147454, ENSG00000114120	223	52	16383	4.23844	1	0.983446	92.6536
GOTERM_BP_FAT	GO:0051173~positive regulation of nitrogen compound metabolic process	13	5.50847	0.15662	ENSG00000177311, ENSG00000146592, ENSG00000136997, ENSG00000108753, ENSG00000147862, ENSG00000101096, ENSG00000068024, ENSG00000118689, ENSG00000172819, ENSG00000196586, ENSG00000125398, ENSG00000112242, ENSG00000172493	176	581	11767	1.49596	1	0.964733	93.7972
GOTERM_BP_FAT	GO:0030323~respiratory tube development	4	1.69492	0.157132	ENSG00000136205, ENSG00000147862, ENSG00000001626, ENSG00000070193	176	92	11767	2.90687	1	0.963361	93.8584
SP_PIR_KEYWORDS	postsynaptic cell membrane	4	1.69492	0.157198	ENSG00000170579, ENSG00000120903, ENSG00000150672, ENSG00000047932	223	101	16396	2.91187	1	0.890863	89.4728
INTERPRO	IPR008266:Tyrosine protein kinase, active site	4	1.69492	0.158743	ENSG00000066468, ENSG00000047936, ENSG00000163785, ENSG00000164715	208	96	14459	2.89643	1	0.965506	91.3773
GOTERM_BP_FAT	GO:0000122~negative regulation of transcription from RNA polymerase II promoter	7	2.9661	0.159094	ENSG00000153814, ENSG00000123933, ENSG00000137166, ENSG00000198625, ENSG00000068024, ENSG00000172819, ENSG00000140836	176	246	11767	1.90246	1	0.963206	94.0875
GOTERM_BP_FAT	GO:0022411~cellular component disassembly	3	1.27119	0.159659	ENSG00000136997, ENSG00000160049, ENSG00000127989	176	48	11767	4.17862	1	0.961886	94.1521
GOTERM_CC_FAT	GO:0016323~basolateral plasma membrane	6	2.54237	0.159967	ENSG00000111859, ENSG00000102606, ENSG00000136205, ENSG00000001626, ENSG00000091409, ENSG00000073712	160	198	10979	2.07936	1	0.91659	89.2651
GOTERM_MF_FAT	GO:0015116~sulfate transmembrane transporter activity	2	0.847458	0.160482	ENSG00000091138, ENSG00000181045	164	12	11269	11.4522	1	0.942275	91.0808
GOTERM_BP_FAT	GO:0007398~ectoderm development	5	2.11864	0.161279	ENSG00000064300, ENSG00000172867, ENSG00000070193, ENSG00000125398, ENSG00000108821	176	142	11767	2.35415	1	0.961467	94.3334
UP_SEQ_FEATURE	compositionally biased region:Poly-Arg	5	2.11864	0.162116	ENSG00000105851, ENSG00000183955, ENSG00000026559, ENSG00000005073, ENSG00000137809	223	156	16383	2.35469	1	0.98401	93.365
SP_PIR_KEYWORDS	receptor	19	8.05085	0.163309	ENSG00000173612, ENSG00000064300, ENSG00000128915, ENSG00000066468, ENSG00000138696, ENSG00000197081, ENSG00000185950, ENSG00000187871, ENSG00000112706, ENSG00000163785, ENSG00000047936, ENSG00000196917, ENSG00000068615, ENSG00000172819, ENSG00000170866, ENSG00000091409, ENSG00000120889, ENSG00000137809, ENSG00000115970	223	1033	16396	1.35234	1	0.889688	90.4345
GOTERM_BP_FAT	GO:0032330~regulation of chondrocyte differentiation	2	0.847458	0.164638	ENSG00000125398, ENSG00000005073	176	12	11767	11.143	1	0.962508	94.6926
GOTERM_BP_FAT	GO:0045444~fat cell differentiation	3	1.27119	0.164914	ENSG00000110092, ENSG00000091409, ENSG00000175029	176	49	11767	4.09334	1	0.960991	94.7211
GOTERM_CC_FAT	GO:0005925~focal adhesion	4	1.69492	0.165936	ENSG00000111859, ENSG00000102606, ENSG00000136205, ENSG00000073712	160	97	10979	2.82964	1	0.912271	90.2017
GOTERM_BP_FAT	GO:0008654~phospholipid biosynthetic process	4	1.69492	0.16794	ENSG00000102230, ENSG00000101126, ENSG00000000419, ENSG00000172197	176	95	11767	2.81507	1	0.961764	95.0249
GOTERM_MF_FAT	GO:0019838~growth factor binding	4	1.69492	0.169069	ENSG00000064300, ENSG00000197081, ENSG00000187498, ENSG00000108821	164	98	11269	2.80463	1	0.944639	92.262
GOTERM_MF_FAT	GO:0005085~guanyl-nucleotide exchange factor activity	5	2.11864	0.169604	ENSG00000159842, ENSG00000006607, ENSG00000102606, ENSG00000203734, ENSG00000128512	164	149	11269	2.30582	1	0.938442	92.3305
GOTERM_CC_FAT	GO:0005912~adherens junction	5	2.11864	0.170067	ENSG00000111859, ENSG00000102606, ENSG00000136205, ENSG00000091409, ENSG00000073712	160	149	10979	2.30264	1	0.905693	90.8052
GOTERM_BP_FAT	GO:0048634~regulation of muscle development	3	1.27119	0.170199	ENSG00000064300, ENSG00000068024, ENSG00000140836	176	50	11767	4.01148	1	0.961898	95.2408
GOTERM_CC_FAT	GO:0030054~cell junction	11	4.66102	0.170302	ENSG00000111859, ENSG00000102606, ENSG00000170579, ENSG00000136205, ENSG00000170743, ENSG00000120903, ENSG00000150672, ENSG00000047932, ENSG00000091409, ENSG00000175029, ENSG00000073712	160	488	10979	1.54673	1	0.893576	90.8385
INTERPRO	IPR018108:Mitochondrial substrate/solute carrier	3	1.27119	0.170559	ENSG00000115840, ENSG00000147454, ENSG00000114120	208	52	14459	4.01045	1	0.969521	92.9442
INTERPRO	IPR014847:FERM adjacent (FA)	2	0.847458	0.171001	ENSG00000172159, ENSG00000006607	208	13	14459	10.6945	1	0.965287	92.9973
GOTERM_BP_FAT	GO:0016477~cell migration	7	2.9661	0.173268	ENSG00000076356, ENSG00000102606, ENSG00000189056, ENSG00000136205, ENSG00000172867, ENSG00000091409, ENSG00000137809	176	252	11767	1.85717	1	0.96267	95.5201
GOTERM_BP_FAT	GO:0035023~regulation of Rho protein signal transduction	4	1.69492	0.175263	ENSG00000159842, ENSG00000006607, ENSG00000102606, ENSG00000203734	176	97	11767	2.75703	1	0.962593	95.6933
GOTERM_BP_FAT	GO:0046854~phosphoinositide phosphorylation	2	0.847458	0.177074	ENSG00000133056, ENSG00000105851	176	13	11767	10.2858	1	0.96238	95.8451
BIOCARTA	h_eif4Pathway:Regulation of eIF4e and p70 S6 Kinase	2	0.847458	0.177333	ENSG00000005882, ENSG00000177369	13	21	1307	9.57509	0.999113	0.970212	82.4668
BIOCARTA	h_igf1mtorpathway:Skeletal muscle hypertrophy is regulated via AKT/mTOR pathway	2	0.847458	0.177333	ENSG00000005882, ENSG00000177369	13	21	1307	9.57509	0.999113	0.970212	82.4668
BBID	107.mRNA_translation-protein_synthesis	2	0.847458	0.177551	ENSG00000005882, ENSG00000177369	6	12	315	8.75	0.858391	0.623691	69.0789
GOTERM_BP_FAT	GO:0046578~regulation of Ras protein signal transduction	6	2.54237	0.177679	ENSG00000159842, ENSG00000006607, ENSG00000102606, ENSG00000203734, ENSG00000153317, ENSG00000011454	176	200	11767	2.00574	1	0.961241	95.8947
GOTERM_CC_FAT	GO:0030135~coated vesicle	5	2.11864	0.178609	ENSG00000197081, ENSG00000170743, ENSG00000047932, ENSG00000196586, ENSG00000166747	160	152	10979	2.2572	1	0.893863	91.9458
GOTERM_BP_FAT	GO:0060541~respiratory system development	4	1.69492	0.178958	ENSG00000136205, ENSG00000147862, ENSG00000001626, ENSG00000070193	176	98	11767	2.7289	1	0.960631	95.9977
SP_PIR_KEYWORDS	repressor	9	3.81356	0.179115	ENSG00000123933, ENSG00000137166, ENSG00000198740, ENSG00000167034, ENSG00000197114, ENSG00000068024, ENSG00000183955, ENSG00000175029, ENSG00000164649	223	402	16396	1.64607	1	0.903106	92.5582
GOTERM_CC_FAT	GO:0005924~cell-substrate adherens junction	4	1.69492	0.180233	ENSG00000111859, ENSG00000102606, ENSG00000136205, ENSG00000073712	160	101	10979	2.71757	1	0.884408	92.1473
SP_PIR_KEYWORDS	heparin-binding	3	1.27119	0.180384	ENSG00000101670, ENSG00000066468, ENSG00000147655	223	57	16396	3.86972	1	0.895065	92.7082
INTERPRO	IPR006539:ATPase, P-type, phospholipid-translocating, flippase	2	0.847458	0.18288	ENSG00000166377, ENSG00000054793	208	14	14459	9.93063	1	0.969195	94.2931
GOTERM_BP_FAT	GO:0046486~glycerolipid metabolic process	5	2.11864	0.184577	ENSG00000133056, ENSG00000102230, ENSG00000105851, ENSG00000101126, ENSG00000000419	176	150	11767	2.2286	1	0.963322	96.422
GOTERM_BP_FAT	GO:0051050~positive regulation of transport	6	2.54237	0.1846	ENSG00000101670, ENSG00000105879, ENSG00000176358, ENSG00000101752, ENSG00000185950, ENSG00000070193	176	203	11767	1.9761	1	0.961812	96.4237
UP_SEQ_FEATURE	domain:PI3K/PI4K	2	0.847458	0.185139	ENSG00000133056, ENSG00000105851	223	15	16383	9.79552	1	0.990443	95.6723
UP_SEQ_FEATURE	region of interest:Dimerization	2	0.847458	0.185139	ENSG00000108753, ENSG00000112242	223	15	16383	9.79552	1	0.990443	95.6723
UP_SEQ_FEATURE	propeptide:Activation peptide	3	1.27119	0.185484	ENSG00000167751, ENSG00000096088, ENSG00000142515	223	58	16383	3.79998	1	0.989226	95.7004
GOTERM_BP_FAT	GO:0043627~response to estrogen stimulus	4	1.69492	0.186412	ENSG00000114120, ENSG00000196917, ENSG00000110092, ENSG00000001626	176	100	11767	2.67432	1	0.961633	96.5512
KEGG_PATHWAY	hsa05214:Glioma	3	1.27119	0.186632	ENSG00000105851, ENSG00000110092, ENSG00000112242	58	61	4400	3.73092	1	0.672244	88.9363
GOTERM_BP_FAT	GO:0022402~cell cycle process	12	5.08475	0.187045	ENSG00000101868, ENSG00000182185, ENSG00000136997, ENSG00000111859, ENSG00000140830, ENSG00000198625, ENSG00000138162, ENSG00000136982, ENSG00000110092, ENSG00000183955, ENSG00000172201, ENSG00000080546	176	544	11767	1.47481	1	0.960578	96.5947
GOTERM_BP_FAT	GO:0046834~lipid phosphorylation	2	0.847458	0.189327	ENSG00000133056, ENSG00000105851	176	14	11767	9.55114	1	0.96077	96.7474
GOTERM_MF_FAT	GO:0042626~ATPase activity, coupled to transmembrane movement of substances	4	1.69492	0.190717	ENSG00000166377, ENSG00000054793, ENSG00000001626, ENSG00000184209, ENSG00000004846	164	104	11269	2.64282	1	0.952737	94.6269
INTERPRO	IPR017871:ABC transporter, conserved site	3	1.27119	0.191151	ENSG00000101126, ENSG00000001626, ENSG00000184209, ENSG00000004846	208	56	14459	3.72399	1	0.970401	95.0597
BIOCARTA	h_mTORPathway:mTOR Signaling Pathway	2	0.847458	0.19262	ENSG00000005882, ENSG00000177369	13	23	1307	8.74247	0.999548	0.923275	85.1679
GOTERM_BP_FAT	GO:0009991~response to extracellular stimulus	6	2.54237	0.193335	ENSG00000146477, ENSG00000101670, ENSG00000110092, ENSG00000172819, ENSG00000091409, ENSG00000108821	176	206	11767	1.94732	1	0.962213	97.0002
GOTERM_BP_FAT	GO:0001655~urogenital system development	4	1.69492	0.193946	ENSG00000115758, ENSG00000167034, ENSG00000108753, ENSG00000005073	176	102	11767	2.62188	1	0.961191	97.037
GOTERM_BP_FAT	GO:0007411~axon guidance	4	1.69492	0.193946	ENSG00000064300, ENSG00000189056, ENSG00000138696, ENSG00000179242	176	102	11767	2.62188	1	0.961191	97.037
GOTERM_MF_FAT	GO:0005319~lipid transporter activity	3	1.27119	0.194116	ENSG00000163746, ENSG00000166377, ENSG00000054793	164	56	11269	3.68108	1	0.950085	94.9305
SP_PIR_KEYWORDS	Transcription	31	13.1356	0.194224	ENSG00000068654, ENSG00000136997, ENSG00000146592, ENSG00000183955, ENSG00000005073, ENSG00000164649, ENSG00000153814, ENSG00000177311, ENSG00000134317, ENSG00000137166, ENSG00000108753, ENSG00000147862, ENSG00000197114, ENSG00000101096, ENSG00000118689, ENSG00000172819, ENSG00000112242, ENSG00000168874, ENSG00000123933, ENSG00000020256, ENSG00000068024, ENSG00000127989, ENSG00000125398, ENSG0000…	223	1881	16396	1.21173	1	0.904586	94.1726
GOTERM_MF_FAT	GO:0016820~hydrolase activity, acting on acid anhydrides, catalyzing transmembrane movement of substances	4	1.69492	0.194393	ENSG00000166377, ENSG00000054793, ENSG00000001626, ENSG00000184209, ENSG00000004846	164	105	11269	2.61765	1	0.9447	94.9545
GOTERM_MF_FAT	GO:0043492~ATPase activity, coupled to movement of substances	4	1.69492	0.194393	ENSG00000166377, ENSG00000054793, ENSG00000001626, ENSG00000184209, ENSG00000004846	164	105	11269	2.61765	1	0.9447	94.9545
INTERPRO	IPR018936:Phosphatidylinositol 3- and 4-kinase, conserved site	2	0.847458	0.194589	ENSG00000133056, ENSG00000105851	208	15	14459	9.26859	1	0.968647	95.3493
INTERPRO	IPR000403:Phosphatidylinositol 3- and 4-kinase, catalytic	2	0.847458	0.194589	ENSG00000133056, ENSG00000105851	208	15	14459	9.26859	1	0.968647	95.3493
UP_SEQ_FEATURE	domain:Rho-GAP	3	1.27119	0.1953	ENSG00000159842, ENSG00000106069, ENSG00000035499	223	60	16383	3.67332	1	0.990616	96.4299
UP_SEQ_FEATURE	zinc finger region:B box-type 2	2	0.847458	0.196191	ENSG00000100505, ENSG00000171206	223	16	16383	9.1833	1	0.989632	96.4901
GOTERM_MF_FAT	GO:0004012~phospholipid-translocating ATPase activity	2	0.847458	0.196428	ENSG00000166377, ENSG00000054793	164	15	11269	9.16179	1	0.940861	95.1278
GOTERM_MF_FAT	GO:0015247~aminophospholipid transporter activity	2	0.847458	0.196428	ENSG00000166377, ENSG00000054793	164	15	11269	9.16179	1	0.940861	95.1278
GOTERM_CC_FAT	GO:0070013~intracellular organelle lumen	30	12.7119	0.196554	ENSG00000068654, ENSG00000064300, ENSG00000136997, ENSG00000179409, ENSG00000196586, ENSG00000005073, ENSG00000153814, ENSG00000101868, ENSG00000134317, ENSG00000137166, ENSG00000136205, ENSG00000041515, ENSG00000108753, ENSG00000147862, ENSG00000110092, ENSG00000172819, ENSG00000112242, ENSG00000005882, ENSG00000160049, ENSG00000136982, ENSG00000068024, ENSG00000127989, ENSG00000115761, ENSG0000…	160	1703	10979	1.20879	1	0.896484	93.9297
GOTERM_CC_FAT	GO:0031941~filamentous actin	2	0.847458	0.196648	ENSG00000196586, ENSG00000073712	160	15	10979	9.14917	1	0.885888	93.9388
GOTERM_CC_FAT	GO:0044430~cytoskeletal part	16	6.77966	0.197576	ENSG00000111859, ENSG00000136997, ENSG00000185640, ENSG00000170579, ENSG00000175764, ENSG00000150672, ENSG00000196586, ENSG00000172867, ENSG00000073712, ENSG00000170421, ENSG00000041515, ENSG00000127914, ENSG00000138162, ENSG00000170477, ENSG00000047932, ENSG00000011454	160	812	10979	1.35209	1	0.876452	94.0279
GOTERM_BP_FAT	GO:0008624~induction of apoptosis by extracellular signals	4	1.69492	0.197741	ENSG00000159842, ENSG00000064300, ENSG00000102606, ENSG00000120889	176	103	11767	2.59643	1	0.962449	97.2567
GOTERM_MF_FAT	GO:0004713~protein tyrosine kinase activity	5	2.11864	0.198522	ENSG00000066468, ENSG00000047936, ENSG00000197081, ENSG00000163785, ENSG00000164715	164	159	11269	2.1608	1	0.937101	95.3003
KEGG_PATHWAY	hsa04722:Neurotrophin signaling pathway	4	1.69492	0.199216	ENSG00000064300, ENSG00000105851, ENSG00000185950, ENSG00000118689	58	119	4400	2.54999	1	0.675251	90.6301
GOTERM_CC_FAT	GO:0031974~membrane-enclosed lumen	31	13.1356	0.200218	ENSG00000068654, ENSG00000064300, ENSG00000136997, ENSG00000197081, ENSG00000179409, ENSG00000196586, ENSG00000005073, ENSG00000153814, ENSG00000101868, ENSG00000134317, ENSG00000137166, ENSG00000136205, ENSG00000041515, ENSG00000108753, ENSG00000147862, ENSG00000110092, ENSG00000172819, ENSG00000112242, ENSG00000005882, ENSG00000160049, ENSG00000136982, ENSG00000068024, ENSG00000127989, ENSG0000…	160	1772	10979	1.20044	1	0.869653	94.2748
SP_PIR_KEYWORDS	differentiation	9	3.81356	0.20139	ENSG00000168874, ENSG00000064300, ENSG00000168899, ENSG00000167693, ENSG00000111913, ENSG00000168743, ENSG00000175029, ENSG00000163874, ENSG00000122574	223	414	16396	1.59836	1	0.904881	94.8191
GOTERM_BP_FAT	GO:0008272~sulfate transport	2	0.847458	0.201397	ENSG00000091138, ENSG00000181045	176	15	11767	8.91439	1	0.963558	97.4538
GOTERM_CC_FAT	GO:0030055~cell-substrate junction	4	1.69492	0.202268	ENSG00000111859, ENSG00000102606, ENSG00000136205, ENSG00000073712	160	107	10979	2.56519	1	0.862165	94.4599
GOTERM_BP_FAT	GO:0009582~detection of abiotic stimulus	3	1.27119	0.202435	ENSG00000064300, ENSG00000136997, ENSG00000167083	176	56	11767	3.58168	1	0.962886	97.5072
UP_SEQ_FEATURE	compositionally biased region:Arg-rich	4	1.69492	0.204738	ENSG00000140832, ENSG00000168883, ENSG00000184209, ENSG00000004846, ENSG00000136848	223	115	16383	2.55535	1	0.990626	97.0209
GOTERM_CC_FAT	GO:0043235~receptor complex	4	1.69492	0.206002	ENSG00000138696, ENSG00000120903, ENSG00000091409, ENSG00000137809	160	108	10979	2.54144	1	0.857429	94.7829
SP_PIR_KEYWORDS	growth factor receptor	2	0.847458	0.206946	ENSG00000066468, ENSG00000197081	223	17	16396	8.64996	1	0.903269	95.274
GOTERM_BP_FAT	GO:0006892~post-Golgi vesicle-mediated transport	3	1.27119	0.207877	ENSG00000047932, ENSG00000118640, ENSG00000166747	176	57	11767	3.51884	1	0.965117	97.7708
GOTERM_BP_FAT	GO:0030100~regulation of endocytosis	3	1.27119	0.207877	ENSG00000105879, ENSG00000101752, ENSG00000070193	176	57	11767	3.51884	1	0.965117	97.7708
GOTERM_BP_FAT	GO:0009953~dorsal/ventral pattern formation	3	1.27119	0.207877	ENSG00000138696, ENSG00000164651, ENSG00000005073	176	57	11767	3.51884	1	0.965117	97.7708
GOTERM_MF_FAT	GO:0000030~mannosyltransferase activity	2	0.847458	0.208067	ENSG00000101126, ENSG00000000419	164	16	11269	8.58918	1	0.940508	96.0173
GOTERM_BP_FAT	GO:0007049~cell cycle	15	6.35593	0.20884	ENSG00000182185, ENSG00000111859, ENSG00000136997, ENSG00000168769, ENSG00000136982, ENSG00000183955, ENSG00000172201, ENSG00000080546, ENSG00000101868, ENSG00000140830, ENSG00000198625, ENSG00000138162, ENSG00000110092, ENSG00000112242, ENSG00000011454	176	738	11767	1.3589	1	0.964429	97.8147
SMART	SM00146:PI3Kc	2	0.847458	0.209215	ENSG00000133056, ENSG00000105851	127	15	8122	8.52703	1	0.95627	93.2426
GOTERM_CC_FAT	GO:0005856~cytoskeleton	22	9.32203	0.210781	ENSG00000172159, ENSG00000111859, ENSG00000136997, ENSG00000185640, ENSG00000170579, ENSG00000175764, ENSG00000151474, ENSG00000172867, ENSG00000150672, ENSG00000196586, ENSG00000115648, ENSG00000073712, ENSG00000170421, ENSG00000163110, ENSG00000006607, ENSG00000041515, ENSG00000127914, ENSG00000138162, ENSG00000170477, ENSG00000111913, ENSG00000047932, ENSG00000011454	160	1202	10979	1.25592	1	0.85449	95.1709
INTERPRO	IPR013111:EGF, extracellular	3	1.27119	0.21205	ENSG00000145934, ENSG00000189056, ENSG00000168743	208	60	14459	3.47572	1	0.974818	96.5915
SP_PIR_KEYWORDS	transcription regulation	30	12.7119	0.212742	ENSG00000136997, ENSG00000146592, ENSG00000183955, ENSG00000005073, ENSG00000164649, ENSG00000153814, ENSG00000177311, ENSG00000134317, ENSG00000137166, ENSG00000108753, ENSG00000147862, ENSG00000197114, ENSG00000101096, ENSG00000118689, ENSG00000172819, ENSG00000112242, ENSG00000168874, ENSG00000123933, ENSG00000020256, ENSG00000068024, ENSG00000127989, ENSG00000125398, ENSG00000175029, ENSG0000…	223	1834	16396	1.20269	1	0.902085	95.7089
GOTERM_BP_FAT	GO:0001502~cartilage condensation	2	0.847458	0.213289	ENSG00000138696, ENSG00000125398	176	16	11767	8.35724	1	0.965932	98.0068
GOTERM_BP_FAT	GO:0045168~cell-cell signaling involved in cell fate specification	2	0.847458	0.213289	ENSG00000070193, ENSG00000005073	176	16	11767	8.35724	1	0.965932	98.0068
GOTERM_BP_FAT	GO:0051148~negative regulation of muscle cell differentiation	2	0.847458	0.213289	ENSG00000068024, ENSG00000140836	176	16	11767	8.35724	1	0.965932	98.0068
GOTERM_BP_FAT	GO:0031128~developmental induction	2	0.847458	0.213289	ENSG00000070193, ENSG00000005073	176	16	11767	8.35724	1	0.965932	98.0068
GOTERM_BP_FAT	GO:0022602~ovulation cycle process	3	1.27119	0.213335	ENSG00000102230, ENSG00000138696, ENSG00000118689	176	58	11767	3.45817	1	0.9647	98.0087
SP_PIR_KEYWORDS	transport	26	11.0169	0.214704	ENSG00000142655, ENSG00000181045, ENSG00000197081, ENSG00000114120, ENSG00000187008, ENSG00000160190, ENSG00000184209, ENSG00000196586, ENSG00000112499, ENSG00000164597, ENSG00000141252, ENSG00000120903, ENSG00000047932, ENSG00000121073, ENSG00000004846, ENSG00000177370, ENSG00000146477, ENSG00000091138, ENSG00000139832, ENSG00000147454, ENSG00000123643, ENSG00000166747, ENSG00000175003, ENSG0000…	223	1560	16396	1.22541	1	0.89637	95.8475
SP_PIR_KEYWORDS	activator	10	4.23729	0.216143	ENSG00000177311, ENSG00000146592, ENSG00000136997, ENSG00000108753, ENSG00000147862, ENSG00000101096, ENSG00000118689, ENSG00000112242, ENSG00000140836, ENSG00000140577	223	488	16396	1.50665	1	0.890079	95.9466
OMIM_DISEASE	Diabetes mellitus, noninsulin-dependent	2	0.847458	0.216561	ENSG00000108753, ENSG00000185950	57	12	2787	8.14912	1	0.987199	94.0534
GOTERM_BP_FAT	GO:0045597~positive regulation of cell differentiation	6	2.54237	0.216729	ENSG00000064300, ENSG00000138696, ENSG00000179242, ENSG00000118689, ENSG00000005073, ENSG00000140836	176	215	11767	1.8658	1	0.965538	98.1444
INTERPRO	IPR000198:RhoGAP	3	1.27119	0.217311	ENSG00000159842, ENSG00000106069, ENSG00000035499	208	61	14459	3.41874	1	0.974241	96.9003
UP_SEQ_FEATURE	domain:PLAT	2	0.847458	0.217849	ENSG00000101670, ENSG00000187008	223	18	16383	8.16293	1	0.992429	97.6914
GOTERM_BP_FAT	GO:0048754~branching morphogenesis of a tube	3	1.27119	0.218807	ENSG00000167034, ENSG00000070193, ENSG00000005073	176	59	11767	3.39956	1	0.965565	98.2231
SP_PIR_KEYWORDS	translation regulation	3	1.27119	0.219838	ENSG00000159217, ENSG00000177369, ENSG00000158615	223	65	16396	3.39345	1	0.886758	96.1911
GOTERM_CC_FAT	GO:0070161~anchoring junction	5	2.11864	0.220043	ENSG00000111859, ENSG00000102606, ENSG00000136205, ENSG00000091409, ENSG00000073712	160	166	10979	2.06683	1	0.858273	95.8482
INTERPRO	IPR011991:Winged helix repressor DNA-binding	5	2.11864	0.220311	ENSG00000185002, ENSG00000137166, ENSG00000035499, ENSG00000118689, ENSG00000112242	208	168	14459	2.06888	1	0.972579	97.0646
GOTERM_MF_FAT	GO:0016779~nucleotidyltransferase activity	4	1.69492	0.220583	ENSG00000068654, ENSG00000101868, ENSG00000102230, ENSG00000124217	164	112	11269	2.45405	1	0.946089	96.8042
INTERPRO	IPR011598:Helix-loop-helix DNA-binding	3	1.27119	0.222583	ENSG00000168874, ENSG00000123933, ENSG00000136997	208	62	14459	3.3636	1	0.970545	97.1836
INTERPRO	IPR001245:Tyrosine protein kinase	4	1.69492	0.223863	ENSG00000066468, ENSG00000047936, ENSG00000163785, ENSG00000164715	208	114	14459	2.4391	1	0.96795	97.2486
INTERPRO	IPR015880:Zinc finger, C2H2-like	14	5.9322	0.224086	ENSG00000153814, ENSG00000177311, ENSG00000146592, ENSG00000137166, ENSG00000105879, ENSG00000198740, ENSG00000168883, ENSG00000101493, ENSG00000106052, ENSG00000125520, ENSG00000020256, ENSG00000101126, ENSG00000164651, ENSG00000140836	208	714	14459	1.36303	1	0.964671	97.2598
GOTERM_BP_FAT	GO:0042471~ear morphogenesis	3	1.27119	0.224291	ENSG00000136997, ENSG00000196586, ENSG00000070193	176	60	11767	3.3429	1	0.967571	98.4161
GOTERM_BP_FAT	GO:0008585~female gonad development	3	1.27119	0.224291	ENSG00000102230, ENSG00000138696, ENSG00000118689	176	60	11767	3.3429	1	0.967571	98.4161
GOTERM_BP_FAT	GO:0060070~Wnt receptor signaling pathway through beta-catenin	2	0.847458	0.225005	ENSG00000110092, ENSG00000172819	176	17	11767	7.86564	1	0.966815	98.4398
GOTERM_BP_FAT	GO:0016575~histone deacetylation	2	0.847458	0.225005	ENSG00000068024, ENSG00000167085	176	17	11767	7.86564	1	0.966815	98.4398
SP_PIR_KEYWORDS	magnesium	9	3.81356	0.227607	ENSG00000068654, ENSG00000166377, ENSG00000066468, ENSG00000138696, ENSG00000054793, ENSG00000168906, ENSG00000163785, ENSG00000137809, ENSG00000163874	223	430	16396	1.53889	1	0.888667	96.6612
GOTERM_BP_FAT	GO:0040007~growth	5	2.11864	0.227652	ENSG00000066468, ENSG00000138696, ENSG00000118689, ENSG00000070193, ENSG00000005073	176	164	11767	2.03835	1	0.967161	98.5245
UP_SEQ_FEATURE	repeat:FG-GAP 2	2	0.847458	0.228459	ENSG00000091409, ENSG00000137809	223	19	16383	7.7333	1	0.993456	98.1277
UP_SEQ_FEATURE	region of interest:Heparin-binding	2	0.847458	0.228459	ENSG00000101670, ENSG00000066468	223	19	16383	7.7333	1	0.993456	98.1277
UP_SEQ_FEATURE	repeat:FG-GAP 7	2	0.847458	0.228459	ENSG00000091409, ENSG00000137809	223	19	16383	7.7333	1	0.993456	98.1277
UP_SEQ_FEATURE	repeat:FG-GAP 5	2	0.847458	0.228459	ENSG00000091409, ENSG00000137809	223	19	16383	7.7333	1	0.993456	98.1277
UP_SEQ_FEATURE	repeat:FG-GAP 4	2	0.847458	0.228459	ENSG00000091409, ENSG00000137809	223	19	16383	7.7333	1	0.993456	98.1277
UP_SEQ_FEATURE	repeat:FG-GAP 3	2	0.847458	0.228459	ENSG00000091409, ENSG00000137809	223	19	16383	7.7333	1	0.993456	98.1277
UP_SEQ_FEATURE	repeat:FG-GAP 6	2	0.847458	0.228459	ENSG00000091409, ENSG00000137809	223	19	16383	7.7333	1	0.993456	98.1277
UP_SEQ_FEATURE	repeat:FG-GAP 1	2	0.847458	0.228459	ENSG00000091409, ENSG00000137809	223	19	16383	7.7333	1	0.993456	98.1277
INTERPRO	IPR000798:Ezrin/radixin/moesin ERM	2	0.847458	0.228725	ENSG00000172159, ENSG00000006607	208	18	14459	7.72382	1	0.964002	97.4831
INTERPRO	IPR000413:Integrin alpha chain	2	0.847458	0.228725	ENSG00000091409, ENSG00000137809	208	18	14459	7.72382	1	0.964002	97.4831
INTERPRO	IPR001024:Lipoxygenase, LH2	2	0.847458	0.228725	ENSG00000101670, ENSG00000187008	208	18	14459	7.72382	1	0.964002	97.4831
INTERPRO	IPR013649:Integrin alpha-2	2	0.847458	0.228725	ENSG00000091409, ENSG00000137809	208	18	14459	7.72382	1	0.964002	97.4831
INTERPRO	IPR018184:Integrin alpha chain, C-terminal cytoplasmic region, conserved site	2	0.847458	0.228725	ENSG00000091409, ENSG00000137809	208	18	14459	7.72382	1	0.964002	97.4831
GOTERM_BP_FAT	GO:0042981~regulation of apoptosis	15	6.35593	0.228788	ENSG00000064300, ENSG00000136997, ENSG00000160049, ENSG00000102606, ENSG00000105851, ENSG00000197081, ENSG00000187871, ENSG00000125398, ENSG00000159842, ENSG00000106052, ENSG00000101126, ENSG00000118689, ENSG00000167085, ENSG00000172819, ENSG00000120889	176	752	11767	1.3336	1	0.966657	98.5595
GOTERM_BP_FAT	GO:0021537~telencephalon development	3	1.27119	0.229785	ENSG00000189056, ENSG00000138162, ENSG00000172201	176	61	11767	3.2881	1	0.966077	98.5896
GOTERM_CC_FAT	GO:0044431~Golgi apparatus part	7	2.9661	0.229791	ENSG00000168899, ENSG00000164597, ENSG00000197081, ENSG00000047932, ENSG00000167080, ENSG00000118640, ENSG00000166747	160	284	10979	1.69131	1	0.862525	96.4657
GOTERM_CC_FAT	GO:0043228~non-membrane-bounded organelle	39	16.5254	0.231574	ENSG00000172159, ENSG00000068654, ENSG00000136997, ENSG00000111859, ENSG00000185640, ENSG00000170579, ENSG00000179409, ENSG00000183955, ENSG00000196586, ENSG00000150672, ENSG00000172867, ENSG00000073712, ENSG00000101868, ENSG00000134317, ENSG00000137166, ENSG00000163110, ENSG00000006607, ENSG00000041515, ENSG00000136205, ENSG00000108753, ENSG00000147862, ENSG00000138162, ENSG00000047932, ENSG0000…	160	2333	10979	1.14708	1	0.855914	96.569
GOTERM_CC_FAT	GO:0043232~intracellular non-membrane-bounded organelle	39	16.5254	0.231574	ENSG00000172159, ENSG00000068654, ENSG00000136997, ENSG00000111859, ENSG00000185640, ENSG00000170579, ENSG00000179409, ENSG00000183955, ENSG00000196586, ENSG00000150672, ENSG00000172867, ENSG00000073712, ENSG00000101868, ENSG00000134317, ENSG00000137166, ENSG00000163110, ENSG00000006607, ENSG00000041515, ENSG00000136205, ENSG00000108753, ENSG00000147862, ENSG00000138162, ENSG00000047932, ENSG0000…	160	2333	10979	1.14708	1	0.855914	96.569
UP_SEQ_FEATURE	transmembrane region	61	25.8475	0.232117	ENSG00000066468, ENSG00000138696, ENSG00000165406, ENSG00000181045, ENSG00000197081, ENSG00000114120, ENSG00000160190, ENSG00000184209, ENSG00000184743, ENSG00000163785, ENSG00000112499, ENSG00000118640, ENSG00000163746, ENSG00000140832, ENSG00000166377, ENSG00000196917, ENSG00000120903, ENSG00000164181, ENSG00000146477, ENSG00000091138, ENSG00000179242, ENSG00000115486, ENSG00000123643, ENSG0000…	223	4049	16383	1.1068	1	0.993258	98.2593
GOTERM_CC_FAT	GO:0043233~organelle lumen	30	12.7119	0.232552	ENSG00000068654, ENSG00000064300, ENSG00000136997, ENSG00000179409, ENSG00000196586, ENSG00000005073, ENSG00000153814, ENSG00000101868, ENSG00000134317, ENSG00000137166, ENSG00000136205, ENSG00000041515, ENSG00000108753, ENSG00000147862, ENSG00000110092, ENSG00000172819, ENSG00000112242, ENSG00000005882, ENSG00000160049, ENSG00000136982, ENSG00000068024, ENSG00000127989, ENSG00000115761, ENSG0000…	160	1741	10979	1.1824	1	0.848304	96.6245
KEGG_PATHWAY	hsa05212:Pancreatic cancer	3	1.27119	0.234273	ENSG00000105851, ENSG00000110092, ENSG00000112242	58	71	4400	3.20544	1	0.719684	94.1851
GOTERM_BP_FAT	GO:0046474~glycerophospholipid biosynthetic process	3	1.27119	0.235289	ENSG00000102230, ENSG00000101126, ENSG00000000419	176	62	11767	3.23506	1	0.968005	98.7454
GOTERM_MF_FAT	GO:0015405~P-P-bond-hydrolysis-driven transmembrane transporter activity	4	1.69492	0.23586	ENSG00000166377, ENSG00000054793, ENSG00000001626, ENSG00000184209, ENSG00000004846	164	116	11269	2.36943	1	0.952965	97.5689
GOTERM_MF_FAT	GO:0015399~primary active transmembrane transporter activity	4	1.69492	0.23586	ENSG00000166377, ENSG00000054793, ENSG00000001626, ENSG00000184209, ENSG00000004846	164	116	11269	2.36943	1	0.952965	97.5689
GOTERM_BP_FAT	GO:0035272~exocrine system development	2	0.847458	0.236548	ENSG00000167034, ENSG00000070193	176	18	11767	7.42866	1	0.967593	98.7787
GOTERM_BP_FAT	GO:0006309~DNA fragmentation involved in apoptosis	2	0.847458	0.236548	ENSG00000136997, ENSG00000160049	176	18	11767	7.42866	1	0.967593	98.7787
GOTERM_BP_FAT	GO:0048870~cell motility	7	2.9661	0.238319	ENSG00000076356, ENSG00000102606, ENSG00000189056, ENSG00000136205, ENSG00000172867, ENSG00000091409, ENSG00000137809	176	280	11767	1.67145	1	0.967461	98.8241
GOTERM_BP_FAT	GO:0051674~localization of cell	7	2.9661	0.238319	ENSG00000076356, ENSG00000102606, ENSG00000189056, ENSG00000136205, ENSG00000172867, ENSG00000091409, ENSG00000137809	176	280	11767	1.67145	1	0.967461	98.8241
GOTERM_BP_FAT	GO:0043067~regulation of programmed cell death	15	6.35593	0.239056	ENSG00000064300, ENSG00000136997, ENSG00000160049, ENSG00000102606, ENSG00000105851, ENSG00000197081, ENSG00000187871, ENSG00000125398, ENSG00000159842, ENSG00000106052, ENSG00000101126, ENSG00000118689, ENSG00000167085, ENSG00000172819, ENSG00000120889	176	759	11767	1.3213	1	0.966774	98.8425
INTERPRO	IPR013519:Integrin alpha beta-propellor	2	0.847458	0.239781	ENSG00000091409, ENSG00000137809	208	19	14459	7.31731	1	0.967012	97.949
GOTERM_BP_FAT	GO:0035239~tube morphogenesis	4	1.69492	0.240542	ENSG00000101752, ENSG00000167034, ENSG00000070193, ENSG00000005073	176	114	11767	2.34589	1	0.966498	98.8789
GOTERM_BP_FAT	GO:0050678~regulation of epithelial cell proliferation	3	1.27119	0.2408	ENSG00000167034, ENSG00000170477, ENSG00000070193	176	63	11767	3.18371	1	0.96555	98.8851
GOTERM_BP_FAT	GO:0042698~ovulation cycle	3	1.27119	0.2408	ENSG00000102230, ENSG00000138696, ENSG00000118689	176	63	11767	3.18371	1	0.96555	98.8851
GOTERM_BP_FAT	GO:0009581~detection of external stimulus	3	1.27119	0.2408	ENSG00000064300, ENSG00000136997, ENSG00000167083	176	63	11767	3.18371	1	0.96555	98.8851
GOTERM_BP_FAT	GO:0010941~regulation of cell death	15	6.35593	0.243513	ENSG00000064300, ENSG00000136997, ENSG00000160049, ENSG00000102606, ENSG00000105851, ENSG00000197081, ENSG00000187871, ENSG00000125398, ENSG00000159842, ENSG00000106052, ENSG00000101126, ENSG00000118689, ENSG00000167085, ENSG00000172819, ENSG00000120889	176	762	11767	1.3161	1	0.965957	98.9484
SP_PIR_KEYWORDS	transmembrane	61	25.8475	0.243907	ENSG00000066468, ENSG00000138696, ENSG00000165406, ENSG00000181045, ENSG00000197081, ENSG00000114120, ENSG00000160190, ENSG00000184209, ENSG00000184743, ENSG00000163785, ENSG00000112499, ENSG00000118640, ENSG00000163746, ENSG00000140832, ENSG00000166377, ENSG00000196917, ENSG00000120903, ENSG00000164181, ENSG00000146477, ENSG00000091138, ENSG00000179242, ENSG00000115486, ENSG00000123643, ENSG0000…	223	4070	16396	1.10197	1	0.900192	97.4785
SMART	SM00324:RhoGAP	3	1.27119	0.244241	ENSG00000159842, ENSG00000106069, ENSG00000035499	127	61	8122	3.14522	1	0.965279	95.9828
SP_PIR_KEYWORDS	Homeobox	5	2.11864	0.24431	ENSG00000167034, ENSG00000108753, ENSG00000101126, ENSG00000005073, ENSG00000140836	223	186	16396	1.97647	1	0.893647	97.4961
SMART	SM00308:LH2	2	0.847458	0.245521	ENSG00000101670, ENSG00000187008	127	18	8122	7.10586	1	0.953736	96.0602
SP_PIR_KEYWORDS	zinc-finger	26	11.0169	0.245592	ENSG00000146592, ENSG00000105879, ENSG00000168883, ENSG00000165406, ENSG00000173821, ENSG00000153814, ENSG00000101868, ENSG00000177311, ENSG00000137166, ENSG00000197114, ENSG00000172819, ENSG00000101752, ENSG00000020256, ENSG00000164651, ENSG00000153317, ENSG00000115648, ENSG00000140836, ENSG00000106069, ENSG00000101493, ENSG00000198740, ENSG00000125520, ENSG00000198625, ENSG00000100505, ENSG0000…	223	1592	16396	1.20078	1	0.888101	97.5515
GOTERM_BP_FAT	GO:0022403~cell cycle phase	9	3.81356	0.247431	ENSG00000101868, ENSG00000182185, ENSG00000111859, ENSG00000140830, ENSG00000138162, ENSG00000136982, ENSG00000110092, ENSG00000183955, ENSG00000172201	176	401	11767	1.50055	1	0.966997	99.0338
GOTERM_BP_FAT	GO:0048286~lung alveolus development	2	0.847458	0.247919	ENSG00000136205, ENSG00000070193	176	19	11767	7.03768	1	0.966209	99.044
SP_PIR_KEYWORDS	ectodermal dysplasia	2	0.847458	0.24908	ENSG00000066468, ENSG00000070193	223	21	16396	7.00235	1	0.885174	97.6964
SP_PIR_KEYWORDS	tumor suppressor	4	1.69492	0.250756	ENSG00000091138, ENSG00000168769, ENSG00000040199, ENSG00000136848	223	128	16396	2.29765	1	0.88024	97.7631
GOTERM_CC_FAT	GO:0005730~nucleolus	13	5.50847	0.251335	ENSG00000068654, ENSG00000005882, ENSG00000179409, ENSG00000115761, ENSG00000125398, ENSG00000101868, ENSG00000134317, ENSG00000137166, ENSG00000159217, ENSG00000136205, ENSG00000108753, ENSG00000147862, ENSG00000101126	160	662	10979	1.3475	1	0.864655	97.5421
GOTERM_BP_FAT	GO:0046660~female sex differentiation	3	1.27119	0.251838	ENSG00000102230, ENSG00000138696, ENSG00000118689	176	65	11767	3.08575	1	0.967233	99.1222
GOTERM_BP_FAT	GO:0046545~development of primary female sexual characteristics	3	1.27119	0.251838	ENSG00000102230, ENSG00000138696, ENSG00000118689	176	65	11767	3.08575	1	0.967233	99.1222
INTERPRO	IPR001356:Homeobox	5	2.11864	0.25189	ENSG00000167034, ENSG00000108753, ENSG00000101126, ENSG00000005073, ENSG00000140836	208	179	14459	1.94174	1	0.970218	98.3666
GOTERM_BP_FAT	GO:0048562~embryonic organ morphogenesis	4	1.69492	0.252485	ENSG00000136997, ENSG00000172819, ENSG00000196586, ENSG00000070193	176	117	11767	2.28574	1	0.966548	99.1345
GOTERM_BP_FAT	GO:0009952~anterior/posterior pattern formation	4	1.69492	0.252485	ENSG00000101752, ENSG00000167034, ENSG00000108753, ENSG00000005073	176	117	11767	2.28574	1	0.966548	99.1345
GOTERM_MF_FAT	GO:0015301~anion:anion antiporter activity	2	0.847458	0.25297	ENSG00000091138, ENSG00000181045	164	20	11269	6.87134	1	0.959914	98.2221
GOTERM_CC_FAT	GO:0014069~postsynaptic density	3	1.27119	0.253181	ENSG00000170579, ENSG00000150672, ENSG00000047932	160	67	10979	3.07248	1	0.858813	97.6186
GOTERM_BP_FAT	GO:0051130~positive regulation of cellular component organization	5	2.11864	0.253418	ENSG00000064300, ENSG00000105879, ENSG00000101752, ENSG00000179242, ENSG00000070193	176	172	11767	1.94355	1	0.966012	99.1519
SP_PIR_KEYWORDS	nucleotidyltransferase	3	1.27119	0.254897	ENSG00000068654, ENSG00000101868, ENSG00000102230	223	72	16396	3.06353	1	0.878287	97.9205
GOTERM_BP_FAT	GO:0048511~rhythmic process	4	1.69492	0.256486	ENSG00000102230, ENSG00000138696, ENSG00000168906, ENSG00000118689	176	118	11767	2.26637	1	0.966595	99.207
SP_PIR_KEYWORDS	nucleus	59	25	0.25673	ENSG00000111859, ENSG00000179409, ENSG00000140829, ENSG00000183955, ENSG00000184209, ENSG00000080546, ENSG00000101868, ENSG00000177311, ENSG00000134317, ENSG00000137166, ENSG00000108753, ENSG00000140830, ENSG00000147862, ENSG00000101096, ENSG00000118689, ENSG00000172819, ENSG00000185002, ENSG00000107669, ENSG00000164651, ENSG00000136982, ENSG00000125398, ENSG00000172201, ENSG00000140836, ENSG0000…	223	3945	16396	1.09961	1	0.873722	97.9869
SMART	SM00191:Int_alpha	2	0.847458	0.257251	ENSG00000091409, ENSG00000137809	127	19	8122	6.73187	1	0.9489	96.7088
INTERPRO	IPR017970:Homeobox, conserved site	5	2.11864	0.257472	ENSG00000167034, ENSG00000108753, ENSG00000101126, ENSG00000005073, ENSG00000140836	208	180	14459	1.93096	1	0.970093	98.5312
GOTERM_BP_FAT	GO:0001501~skeletal system development	7	2.9661	0.258117	ENSG00000136997, ENSG00000138696, ENSG00000068024, ENSG00000163785, ENSG00000125398, ENSG00000005073, ENSG00000108821	176	288	11767	1.62502	1	0.966432	99.235
GOTERM_BP_FAT	GO:0008633~activation of pro-apoptotic gene products	2	0.847458	0.259123	ENSG00000136997, ENSG00000120889	176	20	11767	6.6858	1	0.965951	99.2517
GOTERM_BP_FAT	GO:0009954~proximal/distal pattern formation	2	0.847458	0.259123	ENSG00000164651, ENSG00000005073	176	20	11767	6.6858	1	0.965951	99.2517
GOTERM_BP_FAT	GO:0022407~regulation of cell-cell adhesion	2	0.847458	0.259123	ENSG00000167080, ENSG00000091409	176	20	11767	6.6858	1	0.965951	99.2517
GOTERM_BP_FAT	GO:0006921~cell structure disassembly during apoptosis	2	0.847458	0.259123	ENSG00000136997, ENSG00000160049	176	20	11767	6.6858	1	0.965951	99.2517
SMART	SM00219:TyrKc	4	1.69492	0.260001	ENSG00000066468, ENSG00000047936, ENSG00000163785, ENSG00000164715	127	114	8122	2.24396	1	0.937927	96.846
UP_SEQ_FEATURE	domain:EGF-like 3	3	1.27119	0.260213	ENSG00000145934, ENSG00000189056, ENSG00000168743	223	73	16383	3.01917	1	0.996198	99.0173
GOTERM_BP_FAT	GO:0030258~lipid modification	3	1.27119	0.262891	ENSG00000133056, ENSG00000105851, ENSG00000167080	176	67	11767	2.99364	1	0.966886	99.3115
GOTERM_BP_FAT	GO:0001763~morphogenesis of a branching structure	3	1.27119	0.262891	ENSG00000167034, ENSG00000070193, ENSG00000005073	176	67	11767	2.99364	1	0.966886	99.3115
GOTERM_BP_FAT	GO:0010720~positive regulation of cell development	3	1.27119	0.262891	ENSG00000064300, ENSG00000179242, ENSG00000005073	176	67	11767	2.99364	1	0.966886	99.3115
UP_SEQ_FEATURE	zinc finger region:RING-type	5	2.11864	0.263437	ENSG00000105879, ENSG00000198625, ENSG00000100505, ENSG00000171206, ENSG00000173821	223	192	16383	1.91319	1	0.996012	99.0809
GOTERM_CC_FAT	GO:0045211~postsynaptic membrane	4	1.69492	0.267508	ENSG00000170579, ENSG00000120903, ENSG00000150672, ENSG00000047932	160	124	10979	2.21351	1	0.868391	98.1416
GOTERM_MF_FAT	GO:0032403~protein complex binding	5	2.11864	0.268542	ENSG00000005882, ENSG00000041515, ENSG00000185950, ENSG00000110092, ENSG00000091409	164	182	11269	1.88773	1	0.964934	98.6711
UP_SEQ_FEATURE	region of interest:Triple-helical region	2	0.847458	0.269487	ENSG00000187498, ENSG00000108821	223	23	16383	6.38838	1	0.996103	99.1901
UP_SEQ_FEATURE	repeat:TNFR-Cys 3	2	0.847458	0.269487	ENSG00000064300, ENSG00000120889	223	23	16383	6.38838	1	0.996103	99.1901
GOTERM_BP_FAT	GO:0048730~epidermis morphogenesis	2	0.847458	0.27016	ENSG00000064300, ENSG00000108821	176	21	11767	6.36742	1	0.969452	99.4143
SP_PIR_KEYWORDS	phosphotransferase	5	2.11864	0.271679	ENSG00000005882, ENSG00000066468, ENSG00000133056, ENSG00000047936, ENSG00000163785	223	195	16396	1.88525	1	0.884177	98.4593
GOTERM_BP_FAT	GO:0000904~cell morphogenesis involved in differentiation	6	2.54237	0.272319	ENSG00000064300, ENSG00000189056, ENSG00000138696, ENSG00000179242, ENSG00000163785, ENSG00000125398	176	235	11767	1.70701	1	0.969543	99.4419
GOTERM_BP_FAT	GO:0045664~regulation of neuron differentiation	4	1.69492	0.272572	ENSG00000064300, ENSG00000101752, ENSG00000179242, ENSG00000172201	176	122	11767	2.19206	1	0.968754	99.4451
UP_SEQ_FEATURE	DNA-binding region:Basic motif	4	1.69492	0.273045	ENSG00000168874, ENSG00000146592, ENSG00000123933, ENSG00000136997	223	134	16383	2.19303	1	0.995959	99.2486
GOTERM_BP_FAT	GO:0048545~response to steroid hormone stimulus	5	2.11864	0.273186	ENSG00000114120, ENSG00000196917, ENSG00000110092, ENSG00000001626, ENSG00000108821	176	178	11767	1.87803	1	0.968131	99.4527
GOTERM_BP_FAT	GO:0007264~small GTPase mediated signal transduction	7	2.9661	0.273251	ENSG00000159842, ENSG00000008853, ENSG00000006607, ENSG00000102606, ENSG00000139832, ENSG00000101246, ENSG00000057608	176	294	11767	1.59186	1	0.967242	99.4535
GOTERM_BP_FAT	GO:0007229~integrin-mediated signaling pathway	3	1.27119	0.273946	ENSG00000111859, ENSG00000091409, ENSG00000137809	176	69	11767	2.90687	1	0.966651	99.462
GOTERM_MF_FAT	GO:0047485~protein N-terminus binding	3	1.27119	0.274244	ENSG00000142655, ENSG00000163110, ENSG00000136848	164	71	11269	2.90338	1	0.964527	98.8073
GOTERM_MF_FAT	GO:0008134~transcription factor binding	10	4.23729	0.274833	ENSG00000153814, ENSG00000123933, ENSG00000142655, ENSG00000091138, ENSG00000167034, ENSG00000068024, ENSG00000172819, ENSG00000183955, ENSG00000175029, ENSG00000172201	164	488	11269	1.40806	1	0.961495	98.8206
PIR_SUPERFAMILY	PIRSF001135:trypsin	2	0.847458	0.275243	ENSG00000167751, ENSG00000142515	84	24	6241	6.19147	1	0.999989	97.3009
GOTERM_BP_FAT	GO:0007166~cell surface receptor linked signal transduction	23	9.74576	0.275487	ENSG00000173612, ENSG00000111859, ENSG00000066468, ENSG00000176358, ENSG00000138696, ENSG00000101752, ENSG00000072803, ENSG00000105851, ENSG00000167693, ENSG00000185950, ENSG00000187008, ENSG00000163785, ENSG00000147655, ENSG00000076356, ENSG00000047936, ENSG00000196917, ENSG00000167083, ENSG00000110092, ENSG00000172819, ENSG00000070193, ENSG00000091409, ENSG00000120889, ENSG00000137809	176	1287	11767	1.19482	1	0.966475	99.4803
GOTERM_BP_FAT	GO:0010604~positive regulation of macromolecule metabolic process	15	6.35593	0.275602	ENSG00000136997, ENSG00000146592, ENSG00000185950, ENSG00000068024, ENSG00000196586, ENSG00000125398, ENSG00000172493, ENSG00000177311, ENSG00000108753, ENSG00000147862, ENSG00000110092, ENSG00000101096, ENSG00000118689, ENSG00000172819, ENSG00000112242	176	783	11767	1.2808	1	0.965602	99.4816
SP_PIR_KEYWORDS	disease mutation	24	10.1695	0.276084	ENSG00000042832, ENSG00000066468, ENSG00000091138, ENSG00000181523, ENSG00000138696, ENSG00000115486, ENSG00000187498, ENSG00000000419, ENSG00000102967, ENSG00000196586, ENSG00000172867, ENSG00000115648, ENSG00000125398, ENSG00000108821, ENSG00000170421, ENSG00000167642, ENSG00000127914, ENSG00000170477, ENSG00000068615, ENSG00000001626, ENSG00000120903, ENSG00000167085, ENSG00000070193, ENSG0000…	223	1482	16396	1.19068	1	0.88274	98.5775
GOTERM_BP_FAT	GO:0051252~regulation of RNA metabolic process	28	11.8644	0.277363	ENSG00000136997, ENSG00000142655, ENSG00000146592, ENSG00000196586, ENSG00000005073, ENSG00000153814, ENSG00000177311, ENSG00000137166, ENSG00000108753, ENSG00000147862, ENSG00000197114, ENSG00000101096, ENSG00000118689, ENSG00000172819, ENSG00000112242, ENSG00000185002, ENSG00000123933, ENSG00000068024, ENSG00000125398, ENSG00000172201, ENSG00000175029, ENSG00000140836, ENSG00000172493, ENSG0000…	176	1608	11767	1.16419	1	0.965543	99.5018
KEGG_PATHWAY	hsa04350:TGF-beta signaling pathway	3	1.27119	0.277768	ENSG00000136997, ENSG00000138696, ENSG00000172201	58	80	4400	2.84483	1	0.76877	96.882
KEGG_PATHWAY	hsa04210:Apoptosis	3	1.27119	0.277768	ENSG00000160049, ENSG00000105851, ENSG00000120889	58	80	4400	2.84483	1	0.76877	96.882
GOTERM_BP_FAT	GO:0008610~lipid biosynthetic process	7	2.9661	0.278344	ENSG00000102230, ENSG00000197977, ENSG00000101126, ENSG00000000419, ENSG00000001626, ENSG00000172197, ENSG00000164181	176	296	11767	1.5811	1	0.9651	99.5128
UP_SEQ_FEATURE	repeat:TNFR-Cys 2	2	0.847458	0.279399	ENSG00000064300, ENSG00000120889	223	24	16383	6.1222	1	0.996083	99.3432
UP_SEQ_FEATURE	domain:EGF-like 8	2	0.847458	0.279399	ENSG00000145934, ENSG00000189056	223	24	16383	6.1222	1	0.996083	99.3432
UP_SEQ_FEATURE	repeat:TNFR-Cys 1	2	0.847458	0.279399	ENSG00000064300, ENSG00000120889	223	24	16383	6.1222	1	0.996083	99.3432
UP_SEQ_FEATURE	domain:C2	3	1.27119	0.280331	ENSG00000159842, ENSG00000133056, ENSG00000136848	223	77	16383	2.86233	1	0.995697	99.3561
GOTERM_BP_FAT	GO:0006917~induction of apoptosis	7	2.9661	0.280899	ENSG00000159842, ENSG00000064300, ENSG00000136997, ENSG00000160049, ENSG00000102606, ENSG00000118689, ENSG00000120889	176	297	11767	1.57578	1	0.96544	99.5402
GOTERM_BP_FAT	GO:0006476~protein amino acid deacetylation	2	0.847458	0.281033	ENSG00000068024, ENSG00000167085	176	22	11767	6.078	1	0.964586	99.5416
INTERPRO	IPR013517:FG-GAP	2	0.847458	0.282448	ENSG00000091409, ENSG00000137809	208	23	14459	6.04473	1	0.977912	99.0957
INTERPRO	IPR001140:ABC transporter, transmembrane region	2	0.847458	0.282448	ENSG00000001626, ENSG00000184209, ENSG00000004846	208	23	14459	6.04473	1	0.977912	99.0957
GOTERM_MF_FAT	GO:0005539~glycosaminoglycan binding	4	1.69492	0.282639	ENSG00000101670, ENSG00000066468, ENSG00000070193, ENSG00000147655	164	128	11269	2.14729	1	0.962298	98.9844
GOTERM_BP_FAT	GO:0012502~induction of programmed cell death	7	2.9661	0.28346	ENSG00000159842, ENSG00000064300, ENSG00000136997, ENSG00000160049, ENSG00000102606, ENSG00000118689, ENSG00000120889	176	298	11767	1.57049	1	0.964871	99.5662
GOTERM_MF_FAT	GO:0004864~phosphoprotein phosphatase inhibitor activity	2	0.847458	0.284978	ENSG00000167641, ENSG00000164715	164	23	11269	5.97508	1	0.96026	99.0292
SP_PIR_KEYWORDS	duplication	5	2.11864	0.286688	ENSG00000042832, ENSG00000064300, ENSG00000066468, ENSG00000179242, ENSG00000187498	223	200	16396	1.83812	1	0.887847	98.8286
GOTERM_CC_FAT	GO:0005681~spliceosome	4	1.69492	0.2872	ENSG00000140830, ENSG00000179409, ENSG00000140829, ENSG00000184209, ENSG00000004846	160	129	10979	2.12771	1	0.882835	98.689
GOTERM_BP_FAT	GO:0030155~regulation of cell adhesion	4	1.69492	0.288764	ENSG00000105879, ENSG00000167080, ENSG00000091409, ENSG00000108821	176	126	11767	2.12247	1	0.966527	99.6157
INTERPRO	IPR000008:C2 calcium-dependent membrane targeting	4	1.69492	0.289232	ENSG00000159842, ENSG00000133056, ENSG00000170743, ENSG00000136848	208	131	14459	2.12258	1	0.978155	99.2097
GOTERM_BP_FAT	GO:0030262~apoptotic nuclear changes	2	0.847458	0.291746	ENSG00000136997, ENSG00000160049	176	23	11767	5.81374	1	0.967047	99.6412
KEGG_PATHWAY	hsa05210:Colorectal cancer	3	1.27119	0.292276	ENSG00000136997, ENSG00000105851, ENSG00000110092	58	83	4400	2.742	1	0.770942	97.4884
SP_PIR_KEYWORDS	mrna splicing	5	2.11864	0.292847	ENSG00000168883, ENSG00000140830, ENSG00000179409, ENSG00000140829, ENSG00000184209, ENSG00000004846	223	202	16396	1.81992	1	0.888292	98.955
SP_PIR_KEYWORDS	heterodimer	3	1.27119	0.295077	ENSG00000064300, ENSG00000168906, ENSG00000091409	223	80	16396	2.75717	1	0.884857	98.9976
GOTERM_CC_FAT	GO:0030140~trans-Golgi network transport vesicle	2	0.847458	0.295653	ENSG00000197081, ENSG00000047932	160	24	10979	5.71823	1	0.884645	98.8747
GOTERM_BP_FAT	GO:0007409~axonogenesis	5	2.11864	0.295958	ENSG00000064300, ENSG00000189056, ENSG00000138696, ENSG00000179242, ENSG00000163785	176	185	11767	1.80697	1	0.968107	99.6745
GOTERM_BP_FAT	GO:0031667~response to nutrient levels	5	2.11864	0.295958	ENSG00000146477, ENSG00000101670, ENSG00000110092, ENSG00000172819, ENSG00000108821	176	185	11767	1.80697	1	0.968107	99.6745
GOTERM_BP_FAT	GO:0045017~glycerolipid biosynthetic process	3	1.27119	0.296028	ENSG00000102230, ENSG00000101126, ENSG00000000419	176	73	11767	2.74759	1	0.967302	99.675
GOTERM_BP_FAT	GO:0007584~response to nutrient	4	1.69492	0.29689	ENSG00000101670, ENSG00000110092, ENSG00000172819, ENSG00000108821	176	128	11767	2.08931	1	0.966851	99.6814
SP_PIR_KEYWORDS	trimer	2	0.847458	0.298626	ENSG00000187498, ENSG00000108821	223	26	16396	5.65574	1	0.882821	99.062
UP_SEQ_FEATURE	zinc finger region:C3H1-type	2	0.847458	0.298825	ENSG00000197114, ENSG00000163874	223	26	16383	5.65126	1	0.996848	99.5681
GOTERM_BP_FAT	GO:0031175~neuron projection development	6	2.54237	0.300356	ENSG00000064300, ENSG00000189056, ENSG00000138696, ENSG00000179242, ENSG00000163785, ENSG00000196586	176	246	11767	1.63068	1	0.96758	99.7061
SMART	SM00389:HOX	5	2.11864	0.301927	ENSG00000167034, ENSG00000108753, ENSG00000101126, ENSG00000005073, ENSG00000140836	127	179	8122	1.78639	1	0.954079	98.3853
GOTERM_BP_FAT	GO:0050680~negative regulation of epithelial cell proliferation	2	0.847458	0.3023	ENSG00000167034, ENSG00000170477	176	24	11767	5.5715	1	0.967622	99.7192
INTERPRO	IPR002113:Adenine nucleotide translocator 1	2	0.847458	0.302879	ENSG00000115840, ENSG00000114120	208	25	14459	5.56115	1	0.980598	99.3996
INTERPRO	IPR002067:Mitochondrial carrier protein	2	0.847458	0.302879	ENSG00000115840, ENSG00000114120	208	25	14459	5.56115	1	0.980598	99.3996
SP_PIR_KEYWORDS	ion transport	10	4.23729	0.302983	ENSG00000146477, ENSG00000181045, ENSG00000112337, ENSG00000147454, ENSG00000187008, ENSG00000120903, ENSG00000001626, ENSG00000026559, ENSG00000112499, ENSG00000175003	223	537	16396	1.36917	1	0.881671	99.1359
GOTERM_MF_FAT	GO:0019212~phosphatase inhibitor activity	2	0.847458	0.305556	ENSG00000167641, ENSG00000164715	164	25	11269	5.49707	1	0.96724	99.3515
GOTERM_MF_FAT	GO:0016831~carboxy-lyase activity	2	0.847458	0.305556	ENSG00000115758, ENSG00000115486	164	25	11269	5.49707	1	0.96724	99.3515
KEGG_PATHWAY	hsa05216:Thyroid cancer	2	0.847458	0.306656	ENSG00000136997, ENSG00000110092	58	28	4400	5.41872	1	0.773096	97.9819
GOTERM_BP_FAT	GO:0006355~regulation of transcription, DNA-dependent	27	11.4407	0.306661	ENSG00000136997, ENSG00000142655, ENSG00000146592, ENSG00000196586, ENSG00000005073, ENSG00000153814, ENSG00000177311, ENSG00000137166, ENSG00000108753, ENSG00000147862, ENSG00000197114, ENSG00000101096, ENSG00000118689, ENSG00000172819, ENSG00000112242, ENSG00000185002, ENSG00000123933, ENSG00000068024, ENSG00000125398, ENSG00000172201, ENSG00000175029, ENSG00000140836, ENSG00000172493, ENSG0000…	176	1569	11767	1.15052	1	0.968713	99.7465
UP_SEQ_FEATURE	domain:EGF-like 7	2	0.847458	0.308342	ENSG00000145934, ENSG00000189056	223	27	16383	5.44195	1	0.997154	99.6498
GOTERM_BP_FAT	GO:0043588~skin development	2	0.847458	0.312697	ENSG00000064300, ENSG00000108821	176	25	11767	5.34864	1	0.970447	99.7802
GOTERM_BP_FAT	GO:0050772~positive regulation of axonogenesis	2	0.847458	0.312697	ENSG00000064300, ENSG00000179242	176	25	11767	5.34864	1	0.970447	99.7802
GOTERM_BP_FAT	GO:0008543~fibroblast growth factor receptor signaling pathway	2	0.847458	0.312697	ENSG00000066468, ENSG00000070193	176	25	11767	5.34864	1	0.970447	99.7802
GOTERM_BP_FAT	GO:0048742~regulation of skeletal muscle fiber development	2	0.847458	0.312697	ENSG00000068024, ENSG00000140836	176	25	11767	5.34864	1	0.970447	99.7802
GOTERM_BP_FAT	GO:0032368~regulation of lipid transport	2	0.847458	0.312697	ENSG00000101670, ENSG00000185950	176	25	11767	5.34864	1	0.970447	99.7802
GOTERM_BP_FAT	GO:0000737~DNA catabolic process, endonucleolytic	2	0.847458	0.312697	ENSG00000136997, ENSG00000160049	176	25	11767	5.34864	1	0.970447	99.7802
GOTERM_BP_FAT	GO:0006417~regulation of translation	4	1.69492	0.313179	ENSG00000132394, ENSG00000159217, ENSG00000177369, ENSG00000158615	176	132	11767	2.026	1	0.969886	99.7827
SMART	SM00355:ZnF_C2H2	14	5.9322	0.313934	ENSG00000153814, ENSG00000177311, ENSG00000146592, ENSG00000137166, ENSG00000105879, ENSG00000198740, ENSG00000168883, ENSG00000101493, ENSG00000106052, ENSG00000125520, ENSG00000020256, ENSG00000101126, ENSG00000164651, ENSG00000140836	127	714	8122	1.25398	1	0.950917	98.6769
GOTERM_MF_FAT	GO:0001727~lipid kinase activity	2	0.847458	0.315623	ENSG00000133056, ENSG00000105851	164	26	11269	5.28565	1	0.968843	99.47
GOTERM_CC_FAT	GO:0005667~transcription factor complex	5	2.11864	0.316006	ENSG00000108753, ENSG00000172819, ENSG00000112242, ENSG00000005073, ENSG00000140836	160	196	10979	1.75048	1	0.897596	99.2269
INTERPRO	IPR017907:Zinc finger, RING-type, conserved site	6	2.54237	0.318258	ENSG00000105879, ENSG00000101752, ENSG00000198625, ENSG00000100505, ENSG00000171206, ENSG00000173821	208	262	14459	1.59193	1	0.983201	99.5624
GOTERM_MF_FAT	GO:0008509~anion transmembrane transporter activity	4	1.69492	0.32222	ENSG00000091138, ENSG00000181045, ENSG00000112337, ENSG00000001626	164	138	11269	1.99169	1	0.968964	99.5364
GOTERM_MF_FAT	GO:0005201~extracellular matrix structural constituent	3	1.27119	0.322434	ENSG00000187498, ENSG00000112706, ENSG00000108821	164	80	11269	2.57675	1	0.966446	99.5384
INTERPRO	IPR017940:ABC transporter integral membrane type 1	2	0.847458	0.322732	ENSG00000001626, ENSG00000184209, ENSG00000004846	208	27	14459	5.14922	1	0.982751	99.6014
INTERPRO	IPR001173:Glycosyl transferase, family 2	2	0.847458	0.322732	ENSG00000000419, ENSG00000167080	208	27	14459	5.14922	1	0.982751	99.6014
INTERPRO	IPR003593:ATPase, AAA+ type, core	4	1.69492	0.324473	ENSG00000182185, ENSG00000173821, ENSG00000001626, ENSG00000184209, ENSG00000004846	208	140	14459	1.98613	1	0.981573	99.6157
SP_PIR_KEYWORDS	dna replication	3	1.27119	0.325029	ENSG00000101868, ENSG00000147862, ENSG00000136982	223	86	16396	2.56481	1	0.897191	99.434
GOTERM_CC_FAT	GO:0008305~integrin complex	2	0.847458	0.325881	ENSG00000091409, ENSG00000137809	160	27	10979	5.08287	1	0.900283	99.3582
SP_PIR_KEYWORDS	hydroxylysine	2	0.847458	0.326778	ENSG00000187498, ENSG00000108821	223	29	16396	5.07067	1	0.893774	99.453
SP_PIR_KEYWORDS	triple helix	2	0.847458	0.326778	ENSG00000187498, ENSG00000108821	223	29	16396	5.07067	1	0.893774	99.453
SP_PIR_KEYWORDS	zinc	31	13.1356	0.328137	ENSG00000068654, ENSG00000146592, ENSG00000105879, ENSG00000168883, ENSG00000165406, ENSG00000173821, ENSG00000153814, ENSG00000101868, ENSG00000177311, ENSG00000137166, ENSG00000163110, ENSG00000136205, ENSG00000197114, ENSG00000172819, ENSG00000186094, ENSG00000101752, ENSG00000020256, ENSG00000164651, ENSG00000115648, ENSG00000153317, ENSG00000140836, ENSG00000106069, ENSG00000189056, ENSG0000…	223	2026	16396	1.12501	1	0.890041	99.4673
GOTERM_MF_FAT	GO:0042623~ATPase activity, coupled	6	2.54237	0.329321	ENSG00000166377, ENSG00000182185, ENSG00000054793, ENSG00000140829, ENSG00000001626, ENSG00000184209, ENSG00000004846	164	262	11269	1.57359	1	0.966778	99.5992
GOTERM_BP_FAT	GO:0006820~anion transport	4	1.69492	0.329492	ENSG00000091138, ENSG00000115840, ENSG00000181045, ENSG00000001626	176	136	11767	1.96641	1	0.975283	99.8532
GOTERM_BP_FAT	GO:0007423~sensory organ development	5	2.11864	0.330009	ENSG00000136997, ENSG00000138696, ENSG00000172819, ENSG00000196586, ENSG00000070193	176	195	11767	1.71431	1	0.974805	99.8551
SMART	SM00239:C2	4	1.69492	0.332149	ENSG00000159842, ENSG00000133056, ENSG00000170743, ENSG00000136848	127	131	8122	1.95276	1	0.951572	99.0285
GOTERM_BP_FAT	GO:0001756~somitogenesis	2	0.847458	0.333032	ENSG00000101752, ENSG00000167034	176	27	11767	4.95244	1	0.975189	99.8654
GOTERM_BP_FAT	GO:0006869~lipid transport	4	1.69492	0.333571	ENSG00000101670, ENSG00000166377, ENSG00000054793, ENSG00000001626	176	137	11767	1.95206	1	0.974725	99.8671
GOTERM_MF_FAT	GO:0019901~protein kinase binding	4	1.69492	0.334124	ENSG00000163110, ENSG00000185950, ENSG00000110092, ENSG00000118689	164	141	11269	1.94932	1	0.96625	99.6371
GOTERM_MF_FAT	GO:0001871~pattern binding	4	1.69492	0.334124	ENSG00000101670, ENSG00000066468, ENSG00000070193, ENSG00000147655	164	141	11269	1.94932	1	0.96625	99.6371
GOTERM_MF_FAT	GO:0030247~polysaccharide binding	4	1.69492	0.334124	ENSG00000101670, ENSG00000066468, ENSG00000070193, ENSG00000147655	164	141	11269	1.94932	1	0.96625	99.6371
GOTERM_BP_FAT	GO:0030326~embryonic limb morphogenesis	3	1.27119	0.334399	ENSG00000164651, ENSG00000172819, ENSG00000005073	176	80	11767	2.50717	1	0.97436	99.8698
GOTERM_BP_FAT	GO:0035113~embryonic appendage morphogenesis	3	1.27119	0.334399	ENSG00000164651, ENSG00000172819, ENSG00000005073	176	80	11767	2.50717	1	0.97436	99.8698
UP_SEQ_FEATURE	compositionally biased region:Poly-Ala	7	2.9661	0.335321	ENSG00000185950, ENSG00000136848, ENSG00000112242, ENSG00000172201, ENSG00000005073, ENSG00000115970, ENSG00000140836	223	349	16383	1.47354	1	0.998283	99.8097
GOTERM_BP_FAT	GO:0048666~neuron development	7	2.9661	0.335604	ENSG00000064300, ENSG00000006607, ENSG00000189056, ENSG00000138696, ENSG00000179242, ENSG00000163785, ENSG00000196586	176	318	11767	1.47172	1	0.974126	99.8736
KEGG_PATHWAY	hsa00240:Pyrimidine metabolism	3	1.27119	0.340314	ENSG00000068654, ENSG00000101868, ENSG00000102967	58	93	4400	2.44716	1	0.799018	98.8125
GOTERM_BP_FAT	GO:0045665~negative regulation of neuron differentiation	2	0.847458	0.342974	ENSG00000101752, ENSG00000172201	176	28	11767	4.77557	1	0.975971	99.8946
GOTERM_BP_FAT	GO:0030500~regulation of bone mineralization	2	0.847458	0.342974	ENSG00000138696, ENSG00000125398	176	28	11767	4.77557	1	0.975971	99.8946
UP_SEQ_FEATURE	compositionally biased region:Poly-Val	2	0.847458	0.345139	ENSG00000101670, ENSG00000068784	223	31	16383	4.73977	1	0.998454	99.8486
GOTERM_BP_FAT	GO:0046907~intracellular transport	12	5.08475	0.345199	ENSG00000157538, ENSG00000142655, ENSG00000164597, ENSG00000115840, ENSG00000147454, ENSG00000047932, ENSG00000184743, ENSG00000196586, ENSG00000070193, ENSG00000118640, ENSG00000166747, ENSG00000115648	176	635	11767	1.26346	1	0.97608	99.9003
GOTERM_BP_FAT	GO:0043583~ear development	3	1.27119	0.345261	ENSG00000136997, ENSG00000196586, ENSG00000070193	176	82	11767	2.44602	1	0.97549	99.9005
GOTERM_BP_FAT	GO:0030900~forebrain development	4	1.69492	0.345801	ENSG00000189056, ENSG00000147862, ENSG00000138162, ENSG00000172201	176	140	11767	1.91023	1	0.975051	99.9018
GOTERM_BP_FAT	GO:0051094~positive regulation of developmental process	6	2.54237	0.346069	ENSG00000064300, ENSG00000138696, ENSG00000179242, ENSG00000118689, ENSG00000005073, ENSG00000140836	176	260	11767	1.54288	1	0.97452	99.9025
OMIM_DISEASE	Genome-wide association analysis identifies 20 loci that influence adult height	2	0.847458	0.348064	ENSG00000177311, ENSG00000186047	57	21	2787	4.65664	1	0.99875	99.2897
GOTERM_MF_FAT	GO:0005099~Ras GTPase activator activity	3	1.27119	0.348892	ENSG00000057608, ENSG00000128512, ENSG00000011454	164	85	11269	2.42518	1	0.96974	99.7338
GOTERM_MF_FAT	GO:0003690~double-stranded DNA binding	3	1.27119	0.348892	ENSG00000136997, ENSG00000147862, ENSG00000127989	164	85	11269	2.42518	1	0.96974	99.7338
SP_PIR_KEYWORDS	s-adenosyl-l-methionine	3	1.27119	0.349739	ENSG00000145996, ENSG00000171861, ENSG00000183955	223	91	16396	2.42389	1	0.903795	99.6536
GOTERM_BP_FAT	GO:0048667~cell morphogenesis involved in neuron differentiation	5	2.11864	0.350464	ENSG00000064300, ENSG00000189056, ENSG00000138696, ENSG00000179242, ENSG00000163785	176	201	11767	1.66313	1	0.975361	99.9126
GOTERM_BP_FAT	GO:0048641~regulation of skeletal muscle tissue development	2	0.847458	0.352769	ENSG00000068024, ENSG00000140836	176	29	11767	4.61089	1	0.975508	99.9175
GOTERM_BP_FAT	GO:0010608~posttranscriptional regulation of gene expression	5	2.11864	0.353664	ENSG00000132394, ENSG00000159217, ENSG00000198625, ENSG00000177369, ENSG00000158615	176	202	11767	1.6549	1	0.975199	99.9194
UP_SEQ_FEATURE	domain:ABC transporter 1	2	0.847458	0.354029	ENSG00000001626, ENSG00000184209, ENSG00000004846	223	32	16383	4.59165	1	0.998577	99.8772
UP_SEQ_FEATURE	domain:ABC transporter 2	2	0.847458	0.354029	ENSG00000001626, ENSG00000184209, ENSG00000004846	223	32	16383	4.59165	1	0.998577	99.8772
UP_SEQ_FEATURE	domain:SH2	3	1.27119	0.355004	ENSG00000106069, ENSG00000136205, ENSG00000152292	223	92	16383	2.39564	1	0.998429	99.88
INTERPRO	IPR018957:Zinc finger, C3HC4 RING-type	5	2.11864	0.357487	ENSG00000101752, ENSG00000165406, ENSG00000100505, ENSG00000171206, ENSG00000173821	208	211	14459	1.64726	1	0.987772	99.8111
UP_SEQ_FEATURE	topological domain:Extracellular	31	13.1356	0.35765	ENSG00000064300, ENSG00000066468, ENSG00000138696, ENSG00000181045, ENSG00000187008, ENSG00000184209, ENSG00000163785, ENSG00000112499, ENSG00000140832, ENSG00000076356, ENSG00000166377, ENSG00000163746, ENSG00000167105, ENSG00000145934, ENSG00000047936, ENSG00000196917, ENSG00000120903, ENSG00000004846, ENSG00000137809, ENSG00000173612, ENSG00000203896, ENSG00000179242, ENSG00000054793, ENSG0000…	223	2053	16383	1.10933	1	0.998335	99.8874
GOTERM_BP_FAT	GO:0045449~regulation of transcription	38	16.1017	0.358064	ENSG00000136997, ENSG00000142655, ENSG00000146592, ENSG00000183955, ENSG00000196586, ENSG00000005073, ENSG00000164649, ENSG00000153814, ENSG00000177311, ENSG00000134317, ENSG00000137166, ENSG00000108753, ENSG00000147862, ENSG00000197114, ENSG00000101096, ENSG00000118689, ENSG00000172819, ENSG00000112242, ENSG00000168874, ENSG00000185002, ENSG00000123933, ENSG00000020256, ENSG00000068024, ENSG0000…	176	2332	11767	1.08945	1	0.976016	99.9279
INTERPRO	IPR001841:Zinc finger, RING-type	6	2.54237	0.358897	ENSG00000105879, ENSG00000101752, ENSG00000198625, ENSG00000100505, ENSG00000171206, ENSG00000173821	208	275	14459	1.51668	1	0.986828	99.8169
GOTERM_CC_FAT	GO:0005743~mitochondrial inner membrane	6	2.54237	0.35899	ENSG00000115840, ENSG00000147454, ENSG00000114120, ENSG00000167085, ENSG00000102967, ENSG00000177370	160	272	10979	1.51365	1	0.920727	99.6632
INTERPRO	IPR001368:TNFR/CD27/30/40/95 cysteine-rich region	2	0.847458	0.360764	ENSG00000064300, ENSG00000120889	208	31	14459	4.4848	1	0.985953	99.8243
GOTERM_BP_FAT	GO:0048812~neuron projection morphogenesis	5	2.11864	0.361025	ENSG00000064300, ENSG00000189056, ENSG00000138696, ENSG00000179242, ENSG00000163785	176	204	11767	1.63868	1	0.976363	99.9331
GOTERM_BP_FAT	GO:0015914~phospholipid transport	2	0.847458	0.362418	ENSG00000166377, ENSG00000054793	176	30	11767	4.4572	1	0.976224	99.9355
GOTERM_BP_FAT	GO:0043467~regulation of generation of precursor metabolites and energy	2	0.847458	0.362418	ENSG00000185950, ENSG00000068024	176	30	11767	4.4572	1	0.976224	99.9355
GOTERM_BP_FAT	GO:0070167~regulation of biomineral formation	2	0.847458	0.362418	ENSG00000138696, ENSG00000125398	176	30	11767	4.4572	1	0.976224	99.9355
SP_PIR_KEYWORDS	hydroxyproline	2	0.847458	0.36257	ENSG00000187498, ENSG00000108821	223	33	16396	4.45604	1	0.909433	99.7335
UP_SEQ_FEATURE	calcium-binding region:3	2	0.847458	0.3628	ENSG00000115840, ENSG00000115756	223	33	16383	4.45251	1	0.998335	99.9004
GOTERM_BP_FAT	GO:0006811~ion transport	13	5.50847	0.364295	ENSG00000146477, ENSG00000091138, ENSG00000115840, ENSG00000181045, ENSG00000123643, ENSG00000112337, ENSG00000147454, ENSG00000187008, ENSG00000120903, ENSG00000001626, ENSG00000026559, ENSG00000112499, ENSG00000175003	176	709	11767	1.22589	1	0.976236	99.9385
GOTERM_MF_FAT	GO:0003677~DNA binding	33	13.9831	0.366133	ENSG00000068654, ENSG00000182185, ENSG00000136997, ENSG00000146592, ENSG00000005073, ENSG00000101868, ENSG00000177311, ENSG00000134317, ENSG00000137166, ENSG00000108753, ENSG00000147862, ENSG00000197114, ENSG00000101096, ENSG00000118689, ENSG00000172819, ENSG00000112242, ENSG00000168874, ENSG00000185002, ENSG00000091138, ENSG00000123933, ENSG00000020256, ENSG00000164651, ENSG00000136982, ENSG0000…	164	2068	11269	1.09649	1	0.973685	99.8163
SMART	SM00382:AAA	4	1.69492	0.370458	ENSG00000182185, ENSG00000173821, ENSG00000001626, ENSG00000184209, ENSG00000004846	127	140	8122	1.82722	1	0.961863	99.5069
UP_SEQ_FEATURE	domain:Death	2	0.847458	0.371452	ENSG00000064300, ENSG00000120889	223	34	16383	4.32155	1	0.998461	99.9193
GOTERM_BP_FAT	GO:0009628~response to abiotic stimulus	7	2.9661	0.372786	ENSG00000042832, ENSG00000064300, ENSG00000136997, ENSG00000167083, ENSG00000110092, ENSG00000168906, ENSG00000108821	176	332	11767	1.40966	1	0.978208	99.9506
KEGG_PATHWAY	hsa04130:SNARE interactions in vesicular transport	2	0.847458	0.37581	ENSG00000168899, ENSG00000118640	58	36	4400	4.21456	1	0.823642	99.3414
GOTERM_BP_FAT	GO:0001822~kidney development	3	1.27119	0.37748	ENSG00000115758, ENSG00000108753, ENSG00000005073	176	88	11767	2.27925	1	0.979003	99.9563
GOTERM_BP_FAT	GO:0043066~negative regulation of apoptosis	7	2.9661	0.378118	ENSG00000064300, ENSG00000136997, ENSG00000160049, ENSG00000106052, ENSG00000105851, ENSG00000101126, ENSG00000187871	176	334	11767	1.40121	1	0.978668	99.957
GOTERM_BP_FAT	GO:0010876~lipid localization	4	1.69492	0.37829	ENSG00000101670, ENSG00000166377, ENSG00000054793, ENSG00000001626	176	148	11767	1.80697	1	0.978201	99.9572
INTERPRO	IPR000488:Death	2	0.847458	0.378976	ENSG00000064300, ENSG00000120889	208	33	14459	4.213	1	0.988278	99.8834
GOTERM_CC_FAT	GO:0030017~sarcomere	3	1.27119	0.380763	ENSG00000163110, ENSG00000068024, ENSG00000170421	160	91	10979	2.26216	1	0.930414	99.7836
GOTERM_BP_FAT	GO:0021987~cerebral cortex development	2	0.847458	0.38129	ENSG00000189056, ENSG00000138162	176	32	11767	4.17862	1	0.978527	99.9605
GOTERM_BP_FAT	GO:0031016~pancreas development	2	0.847458	0.38129	ENSG00000108753, ENSG00000070193	176	32	11767	4.17862	1	0.978527	99.9605
GOTERM_BP_FAT	GO:0051153~regulation of striated muscle cell differentiation	2	0.847458	0.38129	ENSG00000068024, ENSG00000140836	176	32	11767	4.17862	1	0.978527	99.9605
SP_PIR_KEYWORDS	cell cycle	8	3.38983	0.38159	ENSG00000111859, ENSG00000168769, ENSG00000140830, ENSG00000136982, ENSG00000110092, ENSG00000183955, ENSG00000112242, ENSG00000011454	223	439	16396	1.33986	1	0.91905	99.8211
GOTERM_MF_FAT	GO:0004428~inositol or phosphatidylinositol kinase activity	2	0.847458	0.382145	ENSG00000133056, ENSG00000105851	164	33	11269	4.16445	1	0.976757	99.871
GOTERM_BP_FAT	GO:0007605~sensory perception of sound	3	1.27119	0.382789	ENSG00000136997, ENSG00000196586, ENSG00000108821	176	89	11767	2.25364	1	0.978435	99.962
GOTERM_BP_FAT	GO:0015698~inorganic anion transport	3	1.27119	0.382789	ENSG00000091138, ENSG00000181045, ENSG00000001626	176	89	11767	2.25364	1	0.978435	99.962
GOTERM_BP_FAT	GO:0009894~regulation of catabolic process	3	1.27119	0.382789	ENSG00000198625, ENSG00000185950, ENSG00000068024	176	89	11767	2.25364	1	0.978435	99.962
GOTERM_CC_FAT	GO:0005829~cytosol	21	8.89831	0.384294	ENSG00000064300, ENSG00000115758, ENSG00000133056, ENSG00000160049, ENSG00000102606, ENSG00000177369, ENSG00000179409, ENSG00000105851, ENSG00000167693, ENSG00000196586, ENSG00000166747, ENSG00000159842, ENSG00000164597, ENSG00000163110, ENSG00000041515, ENSG00000127914, ENSG00000110092, ENSG00000101096, ENSG00000118689, ENSG00000124217, ENSG00000011454	160	1273	10979	1.13197	1	0.928122	99.7989
SMART	SM00208:TNFR	2	0.847458	0.384666	ENSG00000064300, ENSG00000120889	127	31	8122	4.12598	1	0.960729	99.6206
GOTERM_BP_FAT	GO:0043065~positive regulation of apoptosis	8	3.38983	0.385213	ENSG00000159842, ENSG00000064300, ENSG00000136997, ENSG00000160049, ENSG00000102606, ENSG00000118689, ENSG00000172819, ENSG00000120889	176	400	11767	1.33716	1	0.9786	99.9644
OMIM_DISEASE	Conduct disorder and ADHD: Evaluation of conduct problems as a categorical and quantitative trait in the international multicentre ADHD genetics study	2	0.847458	0.386878	ENSG00000187008, ENSG00000102967	57	24	2787	4.07456	1	0.99888	99.6507
KEGG_PATHWAY	hsa04650:Natural killer cell mediated cytotoxicity	3	1.27119	0.387392	ENSG00000105851, ENSG00000101096, ENSG00000120889	58	103	4400	2.20957	1	0.821962	99.4606
GOTERM_BP_FAT	GO:0030182~neuron differentiation	8	3.38983	0.387661	ENSG00000064300, ENSG00000006607, ENSG00000189056, ENSG00000138696, ENSG00000179242, ENSG00000163785, ENSG00000196586, ENSG00000172201	176	401	11767	1.33382	1	0.978772	99.9666
INTERPRO	IPR002909:Cell surface receptor IPT/TIG	2	0.847458	0.387887	ENSG00000076356, ENSG00000101096	208	34	14459	4.08908	1	0.988753	99.905
GOTERM_MF_FAT	GO:0008092~cytoskeletal protein binding	9	3.81356	0.388026	ENSG00000172159, ENSG00000006607, ENSG00000163110, ENSG00000041515, ENSG00000151474, ENSG00000196586, ENSG00000115648, ENSG00000011454, ENSG00000122574	164	478	11269	1.29377	1	0.976673	99.8869
SP_PIR_KEYWORDS	sugar transport	2	0.847458	0.388166	ENSG00000160190, ENSG00000121073	223	36	16396	4.0847	1	0.91965	99.8446
GOTERM_BP_FAT	GO:0043069~negative regulation of programmed cell death	7	2.9661	0.388787	ENSG00000064300, ENSG00000136997, ENSG00000160049, ENSG00000106052, ENSG00000105851, ENSG00000101126, ENSG00000187871	176	338	11767	1.38463	1	0.978583	99.9676
GOTERM_MF_FAT	GO:0003712~transcription cofactor activity	7	2.9661	0.39002	ENSG00000153814, ENSG00000123933, ENSG00000142655, ENSG00000091138, ENSG00000183955, ENSG00000175029, ENSG00000172201	164	348	11269	1.38217	1	0.97546	99.8919
GOTERM_BP_FAT	GO:0048568~embryonic organ development	4	1.69492	0.390381	ENSG00000136997, ENSG00000172819, ENSG00000196586, ENSG00000070193	176	151	11767	1.77107	1	0.978524	99.969
GOTERM_BP_FAT	GO:0034976~response to endoplasmic reticulum stress	2	0.847458	0.390517	ENSG00000158615, ENSG00000110092	176	33	11767	4.052	1	0.978065	99.9691
GOTERM_BP_FAT	GO:0006506~GPI anchor biosynthetic process	2	0.847458	0.390517	ENSG00000101126, ENSG00000000419	176	33	11767	4.052	1	0.978065	99.9691
GOTERM_BP_FAT	GO:0060548~negative regulation of cell death	7	2.9661	0.391455	ENSG00000064300, ENSG00000136997, ENSG00000160049, ENSG00000106052, ENSG00000105851, ENSG00000101126, ENSG00000187871	176	339	11767	1.38055	1	0.977827	99.9698
KEGG_PATHWAY	hsa04960:Aldosterone-regulated sodium reabsorption	2	0.847458	0.392011	ENSG00000105851, ENSG00000185950	58	38	4400	3.99274	1	0.813513	99.5024
GOTERM_BP_FAT	GO:0043068~positive regulation of programmed cell death	8	3.38983	0.392558	ENSG00000159842, ENSG00000064300, ENSG00000136997, ENSG00000160049, ENSG00000102606, ENSG00000118689, ENSG00000172819, ENSG00000120889	176	403	11767	1.32721	1	0.977636	99.9707
GOTERM_BP_FAT	GO:0051640~organelle localization	3	1.27119	0.393348	ENSG00000076356, ENSG00000138162, ENSG00000115648	176	91	11767	2.20411	1	0.977358	99.9713
SP_PIR_KEYWORDS	cell adhesion	7	2.9661	0.394189	ENSG00000111859, ENSG00000189056, ENSG00000179242, ENSG00000168743, ENSG00000091409, ENSG00000137809, ENSG00000073712	223	374	16396	1.37613	1	0.919902	99.8636
INTERPRO	IPR013785:Aldolase-type TIM barrel	2	0.847458	0.396671	ENSG00000145996, ENSG00000102967	208	35	14459	3.97225	1	0.989191	99.9226
GOTERM_BP_FAT	GO:0010942~positive regulation of cell death	8	3.38983	0.397457	ENSG00000159842, ENSG00000064300, ENSG00000136997, ENSG00000160049, ENSG00000102606, ENSG00000118689, ENSG00000172819, ENSG00000120889	176	405	11767	1.32065	1	0.978009	99.9744
GOTERM_BP_FAT	GO:0050767~regulation of neurogenesis	4	1.69492	0.398541	ENSG00000064300, ENSG00000101752, ENSG00000179242, ENSG00000172201	176	153	11767	1.74792	1	0.97782	99.9751
GOTERM_BP_FAT	GO:0040017~positive regulation of locomotion	3	1.27119	0.398597	ENSG00000105879, ENSG00000185950, ENSG00000070193	176	92	11767	2.18015	1	0.977345	99.9751
GOTERM_BP_FAT	GO:0015918~sterol transport	2	0.847458	0.399607	ENSG00000101670, ENSG00000001626	176	34	11767	3.93282	1	0.977136	99.9758
GOTERM_BP_FAT	GO:0030301~cholesterol transport	2	0.847458	0.399607	ENSG00000101670, ENSG00000001626	176	34	11767	3.93282	1	0.977136	99.9758
GOTERM_BP_FAT	GO:0006505~GPI anchor metabolic process	2	0.847458	0.399607	ENSG00000101126, ENSG00000000419	176	34	11767	3.93282	1	0.977136	99.9758
GOTERM_BP_FAT	GO:0009895~negative regulation of catabolic process	2	0.847458	0.399607	ENSG00000198625, ENSG00000068024	176	34	11767	3.93282	1	0.977136	99.9758
GOTERM_BP_FAT	GO:0006984~ER-nuclear signaling pathway	2	0.847458	0.399607	ENSG00000158615, ENSG00000110092	176	34	11767	3.93282	1	0.977136	99.9758
GOTERM_BP_FAT	GO:0048565~gut development	2	0.847458	0.399607	ENSG00000137166, ENSG00000070193	176	34	11767	3.93282	1	0.977136	99.9758
GOTERM_MF_FAT	GO:0015179~L-amino acid transmembrane transporter activity	2	0.847458	0.399942	ENSG00000115840, ENSG00000123643	164	35	11269	3.92648	1	0.976608	99.9138
UP_SEQ_FEATURE	topological domain:Cytoplasmic	39	16.5254	0.400241	ENSG00000064300, ENSG00000066468, ENSG00000138696, ENSG00000181045, ENSG00000197081, ENSG00000187008, ENSG00000184209, ENSG00000184743, ENSG00000163785, ENSG00000112499, ENSG00000118640, ENSG00000140832, ENSG00000076356, ENSG00000166377, ENSG00000163746, ENSG00000167105, ENSG00000145934, ENSG00000047936, ENSG00000196917, ENSG00000170743, ENSG00000120903, ENSG00000004846, ENSG00000137809, ENSG0000…	223	2673	16383	1.0719	1	0.999095	99.9607
GOTERM_CC_FAT	GO:0005581~collagen	2	0.847458	0.400333	ENSG00000187498, ENSG00000108821	160	35	10979	3.92107	1	0.933563	99.8566
INTERPRO	IPR011333:BTB/POZ fold	4	1.69492	0.401435	ENSG00000008853, ENSG00000177311, ENSG00000121067, ENSG00000026559	208	160	14459	1.73786	1	0.988983	99.9308
SMART	SM00005:DEATH	2	0.847458	0.403683	ENSG00000064300, ENSG00000120889	127	33	8122	3.87592	1	0.961809	99.7354
GOTERM_BP_FAT	GO:0051260~protein homooligomerization	3	1.27119	0.403825	ENSG00000142655, ENSG00000047932, ENSG00000184743	176	93	11767	2.15671	1	0.977822	99.9784
GOTERM_BP_FAT	GO:0009725~response to hormone stimulus	7	2.9661	0.404789	ENSG00000114120, ENSG00000196917, ENSG00000185950, ENSG00000110092, ENSG00000168906, ENSG00000001626, ENSG00000108821	176	344	11767	1.36048	1	0.977606	99.979
UP_SEQ_FEATURE	DNA-binding region:Fork-head	2	0.847458	0.404905	ENSG00000137166, ENSG00000118689	223	38	16383	3.86665	1	0.999082	99.9651
INTERPRO	IPR001609:Myosin head, motor region	2	0.847458	0.405329	ENSG00000041515, ENSG00000196586	208	36	14459	3.86191	1	0.988642	99.9369
INTERPRO	IPR008250:ATPase, P-type, ATPase-associated region	2	0.847458	0.405329	ENSG00000166377, ENSG00000054793	208	36	14459	3.86191	1	0.988642	99.9369
INTERPRO	IPR018303:ATPase, P-type phosphorylation site	2	0.847458	0.405329	ENSG00000166377, ENSG00000054793	208	36	14459	3.86191	1	0.988642	99.9369
INTERPRO	IPR001757:ATPase, P-type, K/Mg/Cd/Cu/Zn/Na/Ca/Na/H-transporter	2	0.847458	0.405329	ENSG00000166377, ENSG00000054793	208	36	14459	3.86191	1	0.988642	99.9369
INTERPRO	IPR000210:BTB/POZ-like	4	1.69492	0.405337	ENSG00000008853, ENSG00000177311, ENSG00000121067, ENSG00000026559	208	161	14459	1.72707	1	0.987642	99.937
GOTERM_BP_FAT	GO:0010906~regulation of glucose metabolic process	2	0.847458	0.408562	ENSG00000185950, ENSG00000068024	176	35	11767	3.82045	1	0.978158	99.9811
GOTERM_BP_FAT	GO:0050954~sensory perception of mechanical stimulus	3	1.27119	0.409032	ENSG00000136997, ENSG00000196586, ENSG00000108821	176	94	11767	2.13376	1	0.977814	99.9813
GOTERM_BP_FAT	GO:0043933~macromolecular complex subunit organization	12	5.08475	0.410304	ENSG00000005020, ENSG00000101670, ENSG00000142655, ENSG00000136997, ENSG00000168883, ENSG00000198625, ENSG00000179409, ENSG00000127989, ENSG00000047932, ENSG00000184743, ENSG00000118640, ENSG00000112242	176	669	11767	1.19925	1	0.977689	99.982
GOTERM_MF_FAT	GO:0008270~zinc ion binding	33	13.9831	0.412648	ENSG00000068654, ENSG00000146592, ENSG00000105879, ENSG00000168883, ENSG00000165406, ENSG00000173821, ENSG00000153814, ENSG00000101868, ENSG00000177311, ENSG00000137166, ENSG00000163110, ENSG00000106052, ENSG00000136205, ENSG00000197114, ENSG00000172819, ENSG00000186094, ENSG00000101752, ENSG00000020256, ENSG00000164651, ENSG00000068024, ENSG00000115648, ENSG00000153317, ENSG00000140836, ENSG0000…	164	2109	11269	1.07517	1	0.978452	99.9359
SMART	SM00429:IPT	2	0.847458	0.412971	ENSG00000076356, ENSG00000101096	127	34	8122	3.76193	1	0.959078	99.779
UP_SEQ_FEATURE	active site:4-aspartylphosphate intermediate	2	0.847458	0.412988	ENSG00000166377, ENSG00000054793	223	39	16383	3.76751	1	0.99914	99.9717
SP_PIR_KEYWORDS	metal-binding	40	16.9492	0.413835	ENSG00000068654, ENSG00000146592, ENSG00000181523, ENSG00000105879, ENSG00000138696, ENSG00000168883, ENSG00000168769, ENSG00000165406, ENSG00000173821, ENSG00000166377, ENSG00000153814, ENSG00000101868, ENSG00000177311, ENSG00000137166, ENSG00000163110, ENSG00000136205, ENSG00000040199, ENSG00000197114, ENSG00000170743, ENSG00000172819, ENSG00000145996, ENSG00000186094, ENSG00000101752, ENSG0000…	223	2762	16396	1.0648	1	0.928755	99.9116
INTERPRO	IPR011042:Six-bladed beta-propeller, TolB-like	2	0.847458	0.413864	ENSG00000145934, ENSG00000047936	208	37	14459	3.75754	1	0.988108	99.9486
KEGG_PATHWAY	hsa04142:Lysosome	3	1.27119	0.414973	ENSG00000181523, ENSG00000197081, ENSG00000166747	58	109	4400	2.08795	1	0.823944	99.6698
GOTERM_BP_FAT	GO:0022404~molting cycle process	2	0.847458	0.417384	ENSG00000064300, ENSG00000125398	176	36	11767	3.71433	1	0.979103	99.9852
GOTERM_BP_FAT	GO:0022405~hair cycle process	2	0.847458	0.417384	ENSG00000064300, ENSG00000125398	176	36	11767	3.71433	1	0.979103	99.9852
GOTERM_BP_FAT	GO:0001942~hair follicle development	2	0.847458	0.417384	ENSG00000064300, ENSG00000125398	176	36	11767	3.71433	1	0.979103	99.9852
INTERPRO	IPR007087:Zinc finger, C2H2-type	12	5.08475	0.419657	ENSG00000153814, ENSG00000177311, ENSG00000146592, ENSG00000137166, ENSG00000105879, ENSG00000198740, ENSG00000101493, ENSG00000125520, ENSG00000020256, ENSG00000101126, ENSG00000164651, ENSG00000140836	208	700	14459	1.19168	1	0.988112	99.9554
SP_PIR_KEYWORDS	integrin	2	0.847458	0.420709	ENSG00000091409, ENSG00000137809	223	40	16396	3.67623	1	0.929473	99.9243
SP_PIR_KEYWORDS	Fatty acid biosynthesis	2	0.847458	0.420709	ENSG00000197977, ENSG00000164181	223	40	16396	3.67623	1	0.929473	99.9243
UP_SEQ_FEATURE	domain:EGF-like 5	2	0.847458	0.420961	ENSG00000145934, ENSG00000189056	223	40	16383	3.67332	1	0.999192	99.9771
SP_PIR_KEYWORDS	SH2 domain	3	1.27119	0.42175	ENSG00000106069, ENSG00000136205, ENSG00000152292	223	106	16396	2.08089	1	0.926746	99.9261
INTERPRO	IPR006020:Phosphotyrosine interaction region	2	0.847458	0.422277	ENSG00000136205, ENSG00000011454	208	38	14459	3.65865	1	0.98759	99.9582
INTERPRO	IPR018122:Transcription factor, fork head, conserved site	2	0.847458	0.422277	ENSG00000137166, ENSG00000118689	208	38	14459	3.65865	1	0.98759	99.9582
INTERPRO	IPR005834:Haloacid dehalogenase-like hydrolase	2	0.847458	0.422277	ENSG00000166377, ENSG00000054793	208	38	14459	3.65865	1	0.98759	99.9582
INTERPRO	IPR001766:Transcription factor, fork head	2	0.847458	0.422277	ENSG00000137166, ENSG00000118689	208	38	14459	3.65865	1	0.98759	99.9582
GOTERM_CC_FAT	GO:0019866~organelle inner membrane	6	2.54237	0.422388	ENSG00000115840, ENSG00000147454, ENSG00000114120, ENSG00000167085, ENSG00000102967, ENSG00000177370	160	294	10979	1.40038	1	0.941811	99.9112
COG_ONTOLOGY	Amino acid transport and metabolism	2	0.847458	0.423954	ENSG00000115758, ENSG00000186094	23	45	1828	3.53237	0.999231	0.972269	97.4054
SMART	SM00184:RING	6	2.54237	0.424253	ENSG00000105879, ENSG00000101752, ENSG00000198625, ENSG00000100505, ENSG00000171206, ENSG00000173821	127	275	8122	1.39533	1	0.957352	99.8231
GOTERM_BP_FAT	GO:0042303~molting cycle	2	0.847458	0.426075	ENSG00000064300, ENSG00000125398	176	37	11767	3.61394	1	0.980821	99.9884
GOTERM_BP_FAT	GO:0048477~oogenesis	2	0.847458	0.426075	ENSG00000138696, ENSG00000118689	176	37	11767	3.61394	1	0.980821	99.9884
GOTERM_BP_FAT	GO:0010675~regulation of cellular carbohydrate metabolic process	2	0.847458	0.426075	ENSG00000185950, ENSG00000068024	176	37	11767	3.61394	1	0.980821	99.9884
GOTERM_BP_FAT	GO:0042633~hair cycle	2	0.847458	0.426075	ENSG00000064300, ENSG00000125398	176	37	11767	3.61394	1	0.980821	99.9884
GOTERM_BP_FAT	GO:0046489~phosphoinositide biosynthetic process	2	0.847458	0.426075	ENSG00000101126, ENSG00000000419	176	37	11767	3.61394	1	0.980821	99.9884
GOTERM_CC_FAT	GO:0044456~synapse part	5	2.11864	0.427749	ENSG00000170579, ENSG00000170743, ENSG00000120903, ENSG00000150672, ENSG00000047932	160	230	10979	1.49171	1	0.940875	99.9212
SP_PIR_KEYWORDS	phospholipid biosynthesis	2	0.847458	0.428571	ENSG00000102230, ENSG00000172197	223	41	16396	3.58657	1	0.927517	99.9368
UP_SEQ_FEATURE	domain:CH	2	0.847458	0.428827	ENSG00000102606, ENSG00000115504	223	41	16383	3.58373	1	0.999239	99.9814
INTERPRO	IPR018029:C2 membrane targeting protein	3	1.27119	0.430453	ENSG00000159842, ENSG00000133056, ENSG00000170743	208	102	14459	2.04454	1	0.988017	99.9658
SMART	SM00242:MYSc	2	0.847458	0.43112	ENSG00000041515, ENSG00000196586	127	36	8122	3.55293	1	0.953895	99.8459
GOTERM_MF_FAT	GO:0034062~RNA polymerase activity	2	0.847458	0.434022	ENSG00000068654, ENSG00000101868	164	39	11269	3.52376	1	0.982179	99.9616
GOTERM_MF_FAT	GO:0003899~DNA-directed RNA polymerase activity	2	0.847458	0.434022	ENSG00000068654, ENSG00000101868	164	39	11269	3.52376	1	0.982179	99.9616
GOTERM_BP_FAT	GO:0048729~tissue morphogenesis	4	1.69492	0.434217	ENSG00000064300, ENSG00000101752, ENSG00000005073, ENSG00000108821	176	162	11767	1.65081	1	0.982288	99.9908
GOTERM_CC_FAT	GO:0005884~actin filament	2	0.847458	0.434435	ENSG00000196586, ENSG00000073712	160	39	10979	3.51891	1	0.940683	99.9322
GOTERM_BP_FAT	GO:0006109~regulation of carbohydrate metabolic process	2	0.847458	0.434638	ENSG00000185950, ENSG00000068024	176	38	11767	3.51884	1	0.98199	99.9909
UP_SEQ_FEATURE	domain:EGF-like 6	2	0.847458	0.436586	ENSG00000145934, ENSG00000189056	223	42	16383	3.4984	1	0.999283	99.9849
SP_PIR_KEYWORDS	nucleotide-binding	24	10.1695	0.437611	ENSG00000008853, ENSG00000182185, ENSG00000005882, ENSG00000066468, ENSG00000133056, ENSG00000138696, ENSG00000139832, ENSG00000054793, ENSG00000105851, ENSG00000140829, ENSG00000184209, ENSG00000196586, ENSG00000184743, ENSG00000163785, ENSG00000166377, ENSG00000132394, ENSG00000041515, ENSG00000127914, ENSG00000047936, ENSG00000001626, ENSG00000168906, ENSG00000004846, ENSG00000124217, ENSG0000…	223	1620	16396	1.08925	1	0.929591	99.9488
GOTERM_CC_FAT	GO:0044459~plasma membrane part	31	13.1356	0.438016	ENSG00000064300, ENSG00000142655, ENSG00000111859, ENSG00000102606, ENSG00000138696, ENSG00000170579, ENSG00000197081, ENSG00000150672, ENSG00000163785, ENSG00000196586, ENSG00000112499, ENSG00000073712, ENSG00000136205, ENSG00000047936, ENSG00000120903, ENSG00000170743, ENSG00000047932, ENSG00000137809, ENSG00000146477, ENSG00000091138, ENSG00000179242, ENSG00000166747, ENSG00000175029, ENSG0000…	160	1992	10979	1.06786	1	0.938921	99.9375
KEGG_PATHWAY	hsa02010:ABC transporters	2	0.847458	0.438175	ENSG00000001626, ENSG00000184209, ENSG00000004846	58	44	4400	3.44828	1	0.834075	99.7855
GOTERM_BP_FAT	GO:0030030~cell projection organization	7	2.9661	0.43934	ENSG00000064300, ENSG00000189056, ENSG00000138696, ENSG00000179242, ENSG00000163785, ENSG00000196586, ENSG00000091409	176	357	11767	1.31094	1	0.982641	99.9921
GOTERM_BP_FAT	GO:0000278~mitotic cell cycle	7	2.9661	0.43934	ENSG00000101868, ENSG00000111859, ENSG00000140830, ENSG00000136982, ENSG00000110092, ENSG00000183955, ENSG00000172201	176	357	11767	1.31094	1	0.982641	99.9921
SP_PIR_KEYWORDS	tyrosine-protein kinase	3	1.27119	0.440278	ENSG00000066468, ENSG00000047936, ENSG00000163785	223	110	16396	2.00522	1	0.927977	99.9519
GOTERM_BP_FAT	GO:0007155~cell adhesion	11	4.66102	0.440553	ENSG00000111859, ENSG00000105879, ENSG00000189056, ENSG00000138696, ENSG00000179242, ENSG00000125398, ENSG00000164465, ENSG00000168743, ENSG00000091409, ENSG00000137809, ENSG00000073712	176	619	11767	1.18811	1	0.982524	99.9924
GOTERM_MF_FAT	GO:0030246~carbohydrate binding	6	2.54237	0.441321	ENSG00000101670, ENSG00000066468, ENSG00000197081, ENSG00000187008, ENSG00000070193, ENSG00000147655	164	301	11269	1.3697	1	0.982454	99.9679
GOTERM_CC_FAT	GO:0030016~myofibril	3	1.27119	0.441345	ENSG00000163110, ENSG00000068024, ENSG00000170421	160	103	10979	1.9986	1	0.937059	99.9421
GOTERM_BP_FAT	GO:0016071~mRNA metabolic process	7	2.9661	0.441986	ENSG00000168883, ENSG00000121067, ENSG00000159217, ENSG00000140830, ENSG00000179409, ENSG00000140829, ENSG00000184209, ENSG00000004846	176	358	11767	1.30728	1	0.982456	99.9927
GOTERM_BP_FAT	GO:0022610~biological adhesion	11	4.66102	0.442577	ENSG00000111859, ENSG00000105879, ENSG00000189056, ENSG00000138696, ENSG00000179242, ENSG00000125398, ENSG00000164465, ENSG00000168743, ENSG00000091409, ENSG00000137809, ENSG00000073712	176	620	11767	1.18619	1	0.982205	99.9928
GOTERM_MF_FAT	GO:0046914~transition metal ion binding	39	16.5254	0.442948	ENSG00000068654, ENSG00000146592, ENSG00000105879, ENSG00000138696, ENSG00000168883, ENSG00000168769, ENSG00000165406, ENSG00000173821, ENSG00000153814, ENSG00000101868, ENSG00000177311, ENSG00000137166, ENSG00000163110, ENSG00000106052, ENSG00000136205, ENSG00000040199, ENSG00000197114, ENSG00000172819, ENSG00000145996, ENSG00000186094, ENSG00000101752, ENSG00000147454, ENSG00000020256, ENSG0000…	164	2546	11269	1.05256	1	0.981487	99.9692
GOTERM_BP_FAT	GO:0051591~response to cAMP	2	0.847458	0.443073	ENSG00000168906, ENSG00000108821	176	39	11767	3.42861	1	0.981932	99.9929
GOTERM_BP_FAT	GO:0051147~regulation of muscle cell differentiation	2	0.847458	0.443073	ENSG00000068024, ENSG00000140836	176	39	11767	3.42861	1	0.981932	99.9929
SP_PIR_KEYWORDS	serine proteinase	2	0.847458	0.443979	ENSG00000167751, ENSG00000142515	223	43	16396	3.41975	1	0.926994	99.9559
UP_SEQ_FEATURE	metal ion-binding site:Magnesium	3	1.27119	0.445263	ENSG00000166377, ENSG00000054793, ENSG00000168906	223	111	16383	1.98558	1	0.999338	99.9881
KEGG_PATHWAY	hsa04930:Type II diabetes mellitus	2	0.847458	0.445527	ENSG00000105851, ENSG00000185950	58	45	4400	3.37165	1	0.829532	99.8136
SP_PIR_KEYWORDS	protein transport	8	3.38983	0.445863	ENSG00000142655, ENSG00000164597, ENSG00000139832, ENSG00000141252, ENSG00000047932, ENSG00000196586, ENSG00000177370, ENSG00000166747	223	467	16396	1.25952	1	0.924972	99.9578
SP_PIR_KEYWORDS	mrna processing	5	2.11864	0.447213	ENSG00000168883, ENSG00000140830, ENSG00000179409, ENSG00000140829, ENSG00000184209, ENSG00000004846	223	253	16396	1.45306	1	0.922642	99.9591
GOTERM_CC_FAT	GO:0016021~integral to membrane	65	27.5424	0.448215	ENSG00000066468, ENSG00000138696, ENSG00000165406, ENSG00000181045, ENSG00000197081, ENSG00000114120, ENSG00000205356, ENSG00000160190, ENSG00000184209, ENSG00000184743, ENSG00000163785, ENSG00000112499, ENSG00000118640, ENSG00000163746, ENSG00000140832, ENSG00000166377, ENSG00000196917, ENSG00000120903, ENSG00000172819, ENSG00000164181, ENSG00000146477, ENSG00000091138, ENSG00000179242, ENSG0000…	160	4332	10979	1.0296	1	0.937131	99.9506
SMART	SM00339:FH	2	0.847458	0.448712	ENSG00000137166, ENSG00000118689	127	38	8122	3.36593	1	0.955263	99.8926
SMART	SM00462:PTB	2	0.847458	0.448712	ENSG00000136205, ENSG00000011454	127	38	8122	3.36593	1	0.955263	99.8926
GOTERM_BP_FAT	GO:0051329~interphase of mitotic cell cycle	3	1.27119	0.449855	ENSG00000101868, ENSG00000110092, ENSG00000172201	176	102	11767	1.96641	1	0.983026	99.9942
GOTERM_BP_FAT	GO:0051606~detection of stimulus	3	1.27119	0.449855	ENSG00000064300, ENSG00000136997, ENSG00000167083	176	102	11767	1.96641	1	0.983026	99.9942
INTERPRO	IPR000980:SH2 motif	3	1.27119	0.449887	ENSG00000106069, ENSG00000136205, ENSG00000152292	208	106	14459	1.96739	1	0.99011	99.9791
GOTERM_BP_FAT	GO:0006888~ER to Golgi vesicle-mediated transport	2	0.847458	0.451383	ENSG00000047932, ENSG00000184743	176	40	11767	3.3429	1	0.982984	99.9944
GOTERM_BP_FAT	GO:0050768~negative regulation of neurogenesis	2	0.847458	0.451383	ENSG00000064300, ENSG00000172201	176	40	11767	3.3429	1	0.982984	99.9944
GOTERM_BP_FAT	GO:0035282~segmentation	2	0.847458	0.451383	ENSG00000101752, ENSG00000167034	176	40	11767	3.3429	1	0.982984	99.9944
GOTERM_MF_FAT	GO:0019899~enzyme binding	9	3.81356	0.452287	ENSG00000163110, ENSG00000197081, ENSG00000185950, ENSG00000110092, ENSG00000068024, ENSG00000118689, ENSG00000115648, ENSG00000128512, ENSG00000140836	164	507	11269	1.21976	1	0.982248	99.9756
GOTERM_BP_FAT	GO:0006915~apoptosis	10	4.23729	0.452453	ENSG00000159842, ENSG00000064300, ENSG00000136997, ENSG00000160049, ENSG00000106052, ENSG00000198625, ENSG00000118689, ENSG00000120889, ENSG00000163874, ENSG00000170421	176	559	11767	1.19603	1	0.982847	99.9946
GOTERM_CC_FAT	GO:0044449~contractile fiber part	3	1.27119	0.455989	ENSG00000163110, ENSG00000068024, ENSG00000170421	160	106	10979	1.94204	1	0.937717	99.9588
SP_PIR_KEYWORDS	developmental protein	11	4.66102	0.457458	ENSG00000168874, ENSG00000064300, ENSG00000134317, ENSG00000168899, ENSG00000189056, ENSG00000167693, ENSG00000111913, ENSG00000168743, ENSG00000005073, ENSG00000163874, ENSG00000122574	223	689	16396	1.17383	1	0.92564	99.9681
SMART	SM00225:BTB	4	1.69492	0.457832	ENSG00000008853, ENSG00000177311, ENSG00000121067, ENSG00000026559	127	161	8122	1.58889	1	0.953154	99.9113
GOTERM_MF_FAT	GO:0019205~nucleobase, nucleoside, nucleotide kinase activity	2	0.847458	0.458314	ENSG00000155085, ENSG00000150672	164	42	11269	3.27207	1	0.982285	99.979
GOTERM_BP_FAT	GO:0044271~nitrogen compound biosynthetic process	6	2.54237	0.459466	ENSG00000166377, ENSG00000115758, ENSG00000054793, ENSG00000168906, ENSG00000102967, ENSG00000124217	176	299	11767	1.34163	1	0.983934	99.9956
KEGG_PATHWAY	hsa04630:Jak-STAT signaling pathway	3	1.27119	0.45957	ENSG00000136997, ENSG00000105851, ENSG00000110092	58	119	4400	1.91249	1	0.831401	99.8582
GOTERM_MF_FAT	GO:0019900~kinase binding	4	1.69492	0.459797	ENSG00000163110, ENSG00000185950, ENSG00000110092, ENSG00000118689	164	173	11269	1.58875	1	0.981343	99.9798
KEGG_PATHWAY	hsa04110:Cell cycle	3	1.27119	0.463926	ENSG00000136997, ENSG00000110092, ENSG00000112242	58	120	4400	1.89655	1	0.824734	99.8699
GOTERM_BP_FAT	GO:0051325~interphase	3	1.27119	0.464754	ENSG00000101868, ENSG00000110092, ENSG00000172201	176	105	11767	1.91023	1	0.984632	99.9963
GOTERM_MF_FAT	GO:0005097~Rab GTPase activator activity	2	0.847458	0.466178	ENSG00000057608, ENSG00000011454	164	43	11269	3.19597	1	0.981492	99.9829
SP_PIR_KEYWORDS	Serine protease	3	1.27119	0.467449	ENSG00000167751, ENSG00000189056, ENSG00000142515	223	116	16396	1.9015	1	0.928398	99.975
GOTERM_BP_FAT	GO:0048858~cell projection morphogenesis	5	2.11864	0.467579	ENSG00000064300, ENSG00000189056, ENSG00000138696, ENSG00000179242, ENSG00000163785	176	236	11767	1.41648	1	0.984842	99.9966
GOTERM_BP_FAT	GO:0030111~regulation of Wnt receptor signaling pathway	2	0.847458	0.467635	ENSG00000110092, ENSG00000070193	176	42	11767	3.18371	1	0.984525	99.9966
GOTERM_BP_FAT	GO:0012501~programmed cell death	10	4.23729	0.469465	ENSG00000159842, ENSG00000064300, ENSG00000136997, ENSG00000160049, ENSG00000106052, ENSG00000198625, ENSG00000118689, ENSG00000120889, ENSG00000163874, ENSG00000170421	176	567	11767	1.17915	1	0.984548	99.9968
SP_PIR_KEYWORDS	Spliceosome	3	1.27119	0.471902	ENSG00000179409, ENSG00000140829, ENSG00000184209, ENSG00000004846	223	117	16396	1.88525	1	0.928014	99.9776
UP_SEQ_FEATURE	domain:EGF-like 1	3	1.27119	0.472315	ENSG00000145934, ENSG00000189056, ENSG00000168743	223	117	16383	1.88375	1	0.999598	99.9945
GOTERM_BP_FAT	GO:0006468~protein amino acid phosphorylation	11	4.66102	0.472841	ENSG00000005882, ENSG00000066468, ENSG00000189056, ENSG00000138696, ENSG00000127914, ENSG00000105851, ENSG00000047936, ENSG00000110092, ENSG00000163785, ENSG00000164715, ENSG00000108798	176	635	11767	1.15817	1	0.984865	99.9971
SP_PIR_KEYWORDS	autophosphorylation	2	0.847458	0.473566	ENSG00000066468, ENSG00000047936	223	47	16396	3.12871	1	0.926084	99.9785
GOTERM_MF_FAT	GO:0004672~protein kinase activity	10	4.23729	0.473733	ENSG00000005882, ENSG00000066468, ENSG00000189056, ENSG00000138696, ENSG00000127914, ENSG00000047936, ENSG00000197081, ENSG00000110092, ENSG00000163785, ENSG00000164715	164	585	11269	1.17459	1	0.981906	99.9859
GOTERM_CC_FAT	GO:0030018~Z disc	2	0.847458	0.474363	ENSG00000163110, ENSG00000170421	160	44	10979	3.11903	1	0.943597	99.9734
GOTERM_BP_FAT	GO:0015837~amine transport	3	1.27119	0.474555	ENSG00000146477, ENSG00000115840, ENSG00000123643	176	107	11767	1.87452	1	0.984867	99.9973
GOTERM_BP_FAT	GO:0006720~isoprenoid metabolic process	2	0.847458	0.475581	ENSG00000101126, ENSG00000000419	176	43	11767	3.10967	1	0.984741	99.9973
GOTERM_BP_FAT	GO:0010721~negative regulation of cell development	2	0.847458	0.475581	ENSG00000064300, ENSG00000172201	176	43	11767	3.10967	1	0.984741	99.9973
GOTERM_BP_FAT	GO:0043433~negative regulation of transcription factor activity	2	0.847458	0.475581	ENSG00000142655, ENSG00000068024	176	43	11767	3.10967	1	0.984741	99.9973
SP_PIR_KEYWORDS	palmitate	4	1.69492	0.475967	ENSG00000163746, ENSG00000091844, ENSG00000203896, ENSG00000150672	223	190	16396	1.54789	1	0.924589	99.9798
SP_PIR_KEYWORDS	atp-binding	19	8.05085	0.47743	ENSG00000182185, ENSG00000005882, ENSG00000066468, ENSG00000133056, ENSG00000138696, ENSG00000054793, ENSG00000105851, ENSG00000140829, ENSG00000184209, ENSG00000163785, ENSG00000196586, ENSG00000166377, ENSG00000041515, ENSG00000127914, ENSG00000047936, ENSG00000001626, ENSG00000168906, ENSG00000004846, ENSG00000124217, ENSG00000164715	223	1286	16396	1.08629	1	0.922569	99.9805
GOTERM_CC_FAT	GO:0031224~intrinsic to membrane	67	28.3898	0.47768	ENSG00000066468, ENSG00000138696, ENSG00000165406, ENSG00000181045, ENSG00000197081, ENSG00000114120, ENSG00000205356, ENSG00000160190, ENSG00000184209, ENSG00000184743, ENSG00000163785, ENSG00000150672, ENSG00000112499, ENSG00000118640, ENSG00000163746, ENSG00000140832, ENSG00000166377, ENSG00000196917, ENSG00000120903, ENSG00000172819, ENSG00000164181, ENSG00000146477, ENSG00000091138, ENSG0000…	160	4501	10979	1.02143	1	0.942022	99.9755
GOTERM_BP_FAT	GO:0007242~intracellular signaling cascade	19	8.05085	0.479697	ENSG00000008853, ENSG00000173612, ENSG00000133056, ENSG00000160049, ENSG00000102606, ENSG00000139832, ENSG00000035499, ENSG00000105851, ENSG00000187871, ENSG00000196586, ENSG00000057608, ENSG00000159842, ENSG00000106069, ENSG00000006607, ENSG00000136205, ENSG00000110092, ENSG00000172819, ENSG00000101246, ENSG00000120889	176	1172	11767	1.08387	1	0.985192	99.9977
SP_PIR_KEYWORDS	myosin	2	0.847458	0.480714	ENSG00000041515, ENSG00000196586	223	48	16396	3.06353	1	0.92163	99.9821
KEGG_PATHWAY	hsa04150:mTOR signaling pathway	2	0.847458	0.480891	ENSG00000105851, ENSG00000177369	58	50	4400	3.03448	1	0.829706	99.9077
UP_SEQ_FEATURE	compositionally biased region:Poly-Thr	2	0.847458	0.480986	ENSG00000170579, ENSG00000040199	223	48	16383	3.0611	1	0.999629	99.9957
GOTERM_BP_FAT	GO:0060429~epithelium development	4	1.69492	0.481014	ENSG00000101752, ENSG00000170477, ENSG00000172867, ENSG00000005073	176	174	11767	1.53696	1	0.985124	99.9978
GOTERM_BP_FAT	GO:0018108~peptidyl-tyrosine phosphorylation	2	0.847458	0.483409	ENSG00000189056, ENSG00000108798	176	44	11767	3.039	1	0.985254	99.9979
GOTERM_BP_FAT	GO:0009119~ribonucleoside metabolic process	2	0.847458	0.483409	ENSG00000168906, ENSG00000102967	176	44	11767	3.039	1	0.985254	99.9979
GOTERM_BP_FAT	GO:0060348~bone development	3	1.27119	0.484247	ENSG00000125398, ENSG00000005073, ENSG00000108821	176	109	11767	1.84013	1	0.985101	99.998
GOTERM_BP_FAT	GO:0040012~regulation of locomotion	4	1.69492	0.484446	ENSG00000105879, ENSG00000185950, ENSG00000070193, ENSG00000108798	176	175	11767	1.52818	1	0.984829	99.998
SP_PIR_KEYWORDS	wnt signaling pathway	3	1.27119	0.485125	ENSG00000072803, ENSG00000167693, ENSG00000147655	223	120	16396	1.83812	1	0.92138	99.984
GOTERM_BP_FAT	GO:0006397~mRNA processing	6	2.54237	0.488215	ENSG00000168883, ENSG00000121067, ENSG00000140830, ENSG00000179409, ENSG00000140829, ENSG00000184209, ENSG00000004846	176	309	11767	1.29821	1	0.985216	99.9982
GOTERM_MF_FAT	GO:0030165~PDZ domain binding	2	0.847458	0.489097	ENSG00000001626, ENSG00000128512	164	46	11269	2.98754	1	0.983894	99.9907
GOTERM_CC_FAT	GO:0043292~contractile fiber	3	1.27119	0.489287	ENSG00000163110, ENSG00000068024, ENSG00000170421	160	113	10979	1.82174	1	0.944459	99.9816
GOTERM_BP_FAT	GO:0055088~lipid homeostasis	2	0.847458	0.491121	ENSG00000101670, ENSG00000185950	176	45	11767	2.97146	1	0.98544	99.9984
GOTERM_BP_FAT	GO:0042398~cellular amino acid derivative biosynthetic process	2	0.847458	0.491121	ENSG00000115758, ENSG00000168906	176	45	11767	2.97146	1	0.98544	99.9984
GOTERM_BP_FAT	GO:0006997~nucleus organization	2	0.847458	0.491121	ENSG00000136997, ENSG00000160049	176	45	11767	2.97146	1	0.98544	99.9984
GOTERM_BP_FAT	GO:0032582~negative regulation of gene-specific transcription	2	0.847458	0.491121	ENSG00000142655, ENSG00000068024	176	45	11767	2.97146	1	0.98544	99.9984
SP_PIR_KEYWORDS	cytoplasm	44	18.6441	0.491379	ENSG00000111859, ENSG00000133056, ENSG00000072803, ENSG00000179409, ENSG00000167693, ENSG00000196586, ENSG00000164649, ENSG00000073712, ENSG00000005020, ENSG00000164597, ENSG00000041515, ENSG00000040199, ENSG00000138162, ENSG00000101096, ENSG00000118689, ENSG00000047932, ENSG00000124217, ENSG00000011454, ENSG00000091844, ENSG00000186094, ENSG00000101752, ENSG00000160049, ENSG00000107669, ENSG0000…	223	3137	16396	1.03127	1	0.922228	99.9863
GOTERM_MF_FAT	GO:0019904~protein domain specific binding	6	2.54237	0.49188	ENSG00000170579, ENSG00000138162, ENSG00000185950, ENSG00000001626, ENSG00000128512, ENSG00000122574	164	319	11269	1.29242	1	0.983344	99.9913
GOTERM_BP_FAT	GO:0051960~regulation of nervous system development	4	1.69492	0.491968	ENSG00000064300, ENSG00000101752, ENSG00000179242, ENSG00000172201	176	177	11767	1.51091	1	0.985295	99.9984
INTERPRO	IPR013069:BTB/POZ	3	1.27119	0.492206	ENSG00000008853, ENSG00000177311, ENSG00000121067	208	115	14459	1.81342	1	0.994176	99.9933
SMART	SM00252:SH2	3	1.27119	0.492222	ENSG00000106069, ENSG00000136205, ENSG00000152292	127	106	8122	1.80998	1	0.961342	99.9582
INTERPRO	IPR001993:Mitochondrial substrate carrier	2	0.847458	0.492784	ENSG00000115840, ENSG00000114120	208	47	14459	2.95806	1	0.993708	99.9934
GOTERM_MF_FAT	GO:0019888~protein phosphatase regulator activity	2	0.847458	0.496517	ENSG00000167641, ENSG00000164715	164	47	11269	2.92398	1	0.983169	99.9924
GOTERM_BP_FAT	GO:0018212~peptidyl-tyrosine modification	2	0.847458	0.498718	ENSG00000189056, ENSG00000108798	176	46	11767	2.90687	1	0.986189	99.9987
GOTERM_BP_FAT	GO:0008584~male gonad development	2	0.847458	0.498718	ENSG00000110092, ENSG00000125398	176	46	11767	2.90687	1	0.986189	99.9987
UP_SEQ_FEATURE	zinc finger region:C2H2-type 1	8	3.38983	0.499162	ENSG00000153814, ENSG00000177311, ENSG00000198740, ENSG00000101493, ENSG00000020256, ENSG00000101126, ENSG00000164651, ENSG00000140836	223	491	16383	1.19701	1	0.999727	99.9975
INTERPRO	IPR003439:ABC transporter-like	2	0.847458	0.50007	ENSG00000001626, ENSG00000184209, ENSG00000004846	208	48	14459	2.89643	1	0.993852	99.9946
GOTERM_MF_FAT	GO:0016887~ATPase activity	6	2.54237	0.500157	ENSG00000166377, ENSG00000182185, ENSG00000054793, ENSG00000140829, ENSG00000001626, ENSG00000184209, ENSG00000004846	164	322	11269	1.28037	1	0.982807	99.9931
GOTERM_CC_FAT	GO:0015629~actin cytoskeleton	5	2.11864	0.500927	ENSG00000163110, ENSG00000041515, ENSG00000196586, ENSG00000115648, ENSG00000073712	160	253	10979	1.3561	1	0.946841	99.9863
KEGG_PATHWAY	hsa00562:Inositol phosphate metabolism	2	0.847458	0.501036	ENSG00000133056, ENSG00000105851	58	53	4400	2.86272	1	0.837413	99.9394
GOTERM_BP_FAT	GO:0009719~response to endogenous stimulus	7	2.9661	0.502006	ENSG00000114120, ENSG00000196917, ENSG00000185950, ENSG00000110092, ENSG00000168906, ENSG00000001626, ENSG00000108821	176	381	11767	1.22836	1	0.986466	99.9989
KEGG_PATHWAY	hsa04910:Insulin signaling pathway	3	1.27119	0.502213	ENSG00000105851, ENSG00000177369, ENSG00000185950	58	129	4400	1.76423	1	0.828942	99.9409
GOTERM_MF_FAT	GO:0005070~SH3/SH2 adaptor activity	2	0.847458	0.50383	ENSG00000005020, ENSG00000106069	164	48	11269	2.86306	1	0.98246	99.9938
GOTERM_BP_FAT	GO:0032990~cell part morphogenesis	5	2.11864	0.503869	ENSG00000064300, ENSG00000189056, ENSG00000138696, ENSG00000179242, ENSG00000163785	176	247	11767	1.3534	1	0.986501	99.9989
GOTERM_CC_FAT	GO:0005798~Golgi-associated vesicle	2	0.847458	0.504279	ENSG00000197081, ENSG00000047932	160	48	10979	2.85911	1	0.945472	99.9875
GOTERM_BP_FAT	GO:0006260~DNA replication	4	1.69492	0.505959	ENSG00000101868, ENSG00000147862, ENSG00000136982, ENSG00000167085	176	181	11767	1.47752	1	0.986575	99.999
GOTERM_BP_FAT	GO:0009451~RNA modification	2	0.847458	0.506202	ENSG00000145996, ENSG00000124217	176	47	11767	2.84502	1	0.986342	99.999
GOTERM_BP_FAT	GO:0031346~positive regulation of cell projection organization	2	0.847458	0.506202	ENSG00000064300, ENSG00000179242	176	47	11767	2.84502	1	0.986342	99.999
INTERPRO	IPR012287:Homeodomain-related	4	1.69492	0.508819	ENSG00000167034, ENSG00000108753, ENSG00000005073, ENSG00000140836	208	189	14459	1.4712	1	0.994125	99.9958
UP_SEQ_FEATURE	nucleotide phosphate-binding region:GTP	5	2.11864	0.510496	ENSG00000008853, ENSG00000132394, ENSG00000139832, ENSG00000184743, ENSG00000101246	223	274	16383	1.34063	1	0.999764	99.9983
GOTERM_BP_FAT	GO:0000279~M phase	6	2.54237	0.510827	ENSG00000182185, ENSG00000111859, ENSG00000140830, ENSG00000138162, ENSG00000136982, ENSG00000183955	176	317	11767	1.26545	1	0.986837	99.9991
GOTERM_MF_FAT	GO:0019208~phosphatase regulator activity	2	0.847458	0.511038	ENSG00000167641, ENSG00000164715	164	49	11269	2.80463	1	0.98284	99.9949
GOTERM_BP_FAT	GO:0016567~protein ubiquitination	3	1.27119	0.512655	ENSG00000105879, ENSG00000101752, ENSG00000072803	176	115	11767	1.74412	1	0.986869	99.9992
GOTERM_BP_FAT	GO:0043087~regulation of GTPase activity	3	1.27119	0.512655	ENSG00000153317, ENSG00000057608, ENSG00000011454	176	115	11767	1.74412	1	0.986869	99.9992
GOTERM_BP_FAT	GO:0009260~ribonucleotide biosynthetic process	3	1.27119	0.512655	ENSG00000166377, ENSG00000054793, ENSG00000102967	176	115	11767	1.74412	1	0.986869	99.9992
GOTERM_BP_FAT	GO:0009314~response to radiation	4	1.69492	0.515223	ENSG00000136997, ENSG00000167083, ENSG00000110092, ENSG00000168906	176	182	11767	1.46941	1	0.987021	99.9993
UP_SEQ_FEATURE	domain:IQ	2	0.847458	0.515313	ENSG00000041515, ENSG00000196586	223	53	16383	2.77232	1	0.999762	99.9985
UP_SEQ_FEATURE	domain:EF-hand 4	2	0.847458	0.515313	ENSG00000115840, ENSG00000115756	223	53	16383	2.77232	1	0.999762	99.9985
GOTERM_MF_FAT	GO:0030955~potassium ion binding	3	1.27119	0.516113	ENSG00000068024, ENSG00000168906, ENSG00000026559	164	119	11269	1.73227	1	0.982801	99.9956
GOTERM_CC_FAT	GO:0031012~extracellular matrix	6	2.54237	0.5177	ENSG00000167642, ENSG00000189056, ENSG00000187498, ENSG00000112706, ENSG00000168743, ENSG00000108821	160	328	10979	1.25522	1	0.948637	99.9912
GOTERM_BP_FAT	GO:0043392~negative regulation of DNA binding	2	0.847458	0.520839	ENSG00000142655, ENSG00000068024	176	49	11767	2.7289	1	0.987648	99.9994
GOTERM_BP_FAT	GO:0016202~regulation of striated muscle tissue development	2	0.847458	0.520839	ENSG00000068024, ENSG00000140836	176	49	11767	2.7289	1	0.987648	99.9994
GOTERM_MF_FAT	GO:0015300~solute:solute antiporter activity	2	0.847458	0.525142	ENSG00000091138, ENSG00000181045	164	51	11269	2.69464	1	0.983543	99.9966
GOTERM_MF_FAT	GO:0015662~ATPase activity, coupled to transmembrane movement of ions, phosphorylative mechanism	2	0.847458	0.525142	ENSG00000166377, ENSG00000054793	164	51	11269	2.69464	1	0.983543	99.9966
GOTERM_MF_FAT	GO:0010843~promoter binding	2	0.847458	0.525142	ENSG00000068024, ENSG00000140836	164	51	11269	2.69464	1	0.983543	99.9966
GOTERM_BP_FAT	GO:0015031~protein transport	12	5.08475	0.526958	ENSG00000142655, ENSG00000164597, ENSG00000139832, ENSG00000141252, ENSG00000047932, ENSG00000196586, ENSG00000070193, ENSG00000177370, ENSG00000166747, ENSG00000115648, ENSG00000057608, ENSG00000108821	176	730	11767	1.09903	1	0.988324	99.9995
GOTERM_BP_FAT	GO:0042472~inner ear morphogenesis	2	0.847458	0.527995	ENSG00000196586, ENSG00000070193	176	50	11767	2.67432	1	0.988238	99.9995
SP_PIR_KEYWORDS	Apoptosis	6	2.54237	0.529368	ENSG00000064300, ENSG00000160049, ENSG00000106052, ENSG00000118689, ENSG00000120889, ENSG00000163874	223	355	16396	1.24267	1	0.939688	99.9951
INTERPRO	IPR011989:Armadillo-like helical	3	1.27119	0.532427	ENSG00000118690, ENSG00000111913, ENSG00000166747	208	124	14459	1.6818	1	0.99551	99.9979
GOTERM_MF_FAT	GO:0016881~acid-amino acid ligase activity	4	1.69492	0.534477	ENSG00000105879, ENSG00000101752, ENSG00000072803, ENSG00000175764	164	195	11269	1.40951	1	0.98432	99.9974
GOTERM_MF_FAT	GO:0046982~protein heterodimerization activity	4	1.69492	0.534477	ENSG00000101868, ENSG00000005882, ENSG00000137166, ENSG00000108753	164	195	11269	1.40951	1	0.98432	99.9974
GOTERM_BP_FAT	GO:0051592~response to calcium ion	2	0.847458	0.535045	ENSG00000115840, ENSG00000110092	176	51	11767	2.62188	1	0.989016	99.9996
GOTERM_BP_FAT	GO:0032355~response to estradiol stimulus	2	0.847458	0.535045	ENSG00000114120, ENSG00000196917	176	51	11767	2.62188	1	0.989016	99.9996
GOTERM_BP_FAT	GO:0042476~odontogenesis	2	0.847458	0.535045	ENSG00000091409, ENSG00000108821	176	51	11767	2.62188	1	0.989016	99.9996
GOTERM_BP_FAT	GO:0045165~cell fate commitment	3	1.27119	0.535534	ENSG00000070193, ENSG00000125398, ENSG00000005073	176	120	11767	1.67145	1	0.988859	99.9996
SP_PIR_KEYWORDS	transferase	19	8.05085	0.536739	ENSG00000068654, ENSG00000005882, ENSG00000066468, ENSG00000133056, ENSG00000102230, ENSG00000138696, ENSG00000107669, ENSG00000105851, ENSG00000171861, ENSG00000000419, ENSG00000183955, ENSG00000163785, ENSG00000172197, ENSG00000101868, ENSG00000047936, ENSG00000168906, ENSG00000167080, ENSG00000124217, ENSG00000164715	223	1330	16396	1.05035	1	0.940887	99.996
GOTERM_MF_FAT	GO:0051015~actin filament binding	2	0.847458	0.538842	ENSG00000041515, ENSG00000196586	164	53	11269	2.59296	1	0.98418	99.9977
GOTERM_CC_FAT	GO:0045202~synapse	6	2.54237	0.539231	ENSG00000170579, ENSG00000170743, ENSG00000120903, ENSG00000150672, ENSG00000047932, ENSG00000175029	160	336	10979	1.22533	1	0.954925	99.9951
GOTERM_CC_FAT	GO:0031674~I band	2	0.847458	0.539305	ENSG00000163110, ENSG00000170421	160	53	10979	2.58939	1	0.952481	99.9951
GOTERM_BP_FAT	GO:0045184~establishment of protein localization	12	5.08475	0.539987	ENSG00000142655, ENSG00000164597, ENSG00000139832, ENSG00000141252, ENSG00000047932, ENSG00000196586, ENSG00000070193, ENSG00000177370, ENSG00000166747, ENSG00000115648, ENSG00000057608, ENSG00000108821	176	737	11767	1.0886	1	0.989253	99.9997
GOTERM_BP_FAT	GO:0008219~cell death	11	4.66102	0.540102	ENSG00000159842, ENSG00000064300, ENSG00000136997, ENSG00000160049, ENSG00000106052, ENSG00000198625, ENSG00000068615, ENSG00000118689, ENSG00000120889, ENSG00000163874, ENSG00000170421	176	669	11767	1.09931	1	0.989048	99.9997
UP_SEQ_FEATURE	repeat:ANK 7	2	0.847458	0.541139	ENSG00000101752, ENSG00000041515	223	57	16383	2.57777	1	0.999856	99.9994
UP_SEQ_FEATURE	domain:EGF-like 4	2	0.847458	0.541139	ENSG00000145934, ENSG00000189056	223	57	16383	2.57777	1	0.999856	99.9994
GOTERM_BP_FAT	GO:0009612~response to mechanical stimulus	2	0.847458	0.54199	ENSG00000136997, ENSG00000108821	176	52	11767	2.57146	1	0.989088	99.9997
GOTERM_BP_FAT	GO:0006497~protein amino acid lipidation	2	0.847458	0.54199	ENSG00000101126, ENSG00000000419	176	52	11767	2.57146	1	0.989088	99.9997
GOTERM_BP_FAT	GO:0006919~activation of caspase activity	2	0.847458	0.54199	ENSG00000136997, ENSG00000120889	176	52	11767	2.57146	1	0.989088	99.9997
GOTERM_MF_FAT	GO:0015171~amino acid transmembrane transporter activity	2	0.847458	0.545544	ENSG00000115840, ENSG00000123643	164	54	11269	2.54494	1	0.984477	99.9981
GOTERM_BP_FAT	GO:0010033~response to organic substance	11	4.66102	0.545905	ENSG00000042832, ENSG00000136997, ENSG00000108753, ENSG00000114120, ENSG00000196917, ENSG00000185950, ENSG00000110092, ENSG00000068024, ENSG00000168906, ENSG00000001626, ENSG00000108821	176	672	11767	1.0944	1	0.989403	99.9997
GOTERM_BP_FAT	GO:0016265~death	11	4.66102	0.547834	ENSG00000159842, ENSG00000064300, ENSG00000136997, ENSG00000160049, ENSG00000106052, ENSG00000198625, ENSG00000068615, ENSG00000118689, ENSG00000120889, ENSG00000163874, ENSG00000170421	176	673	11767	1.09277	1	0.989449	99.9998
GOTERM_BP_FAT	GO:0006916~anti-apoptosis	4	1.69492	0.548614	ENSG00000064300, ENSG00000136997, ENSG00000106052, ENSG00000187871	176	192	11767	1.39287	1	0.989341	99.9998
GOTERM_BP_FAT	GO:0042542~response to hydrogen peroxide	2	0.847458	0.548832	ENSG00000158615, ENSG00000108821	176	53	11767	2.52294	1	0.989156	99.9998
GOTERM_MF_FAT	GO:0003924~GTPase activity	4	1.69492	0.551367	ENSG00000132394, ENSG00000167083, ENSG00000184743, ENSG00000101246	164	198	11269	1.38815	1	0.984621	99.9985
GOTERM_BP_FAT	GO:0010035~response to inorganic substance	4	1.69492	0.553358	ENSG00000115840, ENSG00000158615, ENSG00000110092, ENSG00000108821	176	194	11767	1.37851	1	0.989553	99.9998
GOTERM_BP_FAT	GO:0050770~regulation of axonogenesis	2	0.847458	0.555572	ENSG00000064300, ENSG00000179242	176	54	11767	2.47622	1	0.989638	99.9998
SP_PIR_KEYWORDS	lysosome	3	1.27119	0.55604	ENSG00000181523, ENSG00000123643, ENSG00000197081	223	137	16396	1.61003	1	0.947394	99.9977
UP_SEQ_FEATURE	compositionally biased region:Gln-rich	3	1.27119	0.556472	ENSG00000137166, ENSG00000168769, ENSG00000127914	223	137	16383	1.60875	1	0.999889	99.9996
INTERPRO	IPR001806:Ras GTPase	3	1.27119	0.558014	ENSG00000008853, ENSG00000139832, ENSG00000101246	208	130	14459	1.60418	1	0.996705	99.9991
GOTERM_CC_FAT	GO:0030139~endocytic vesicle	2	0.847458	0.559128	ENSG00000133056, ENSG00000196586	160	56	10979	2.45067	1	0.957784	99.9972
UP_SEQ_FEATURE	zinc finger region:C2H2-type 2; degenerate	2	0.847458	0.559606	ENSG00000177311, ENSG00000198740	223	60	16383	2.44888	1	0.999883	99.9997
GOTERM_BP_FAT	GO:0006350~transcription	29	12.2881	0.560698	ENSG00000168874, ENSG00000068654, ENSG00000146592, ENSG00000123933, ENSG00000136997, ENSG00000020256, ENSG00000068024, ENSG00000183955, ENSG00000127989, ENSG00000125398, ENSG00000005073, ENSG00000164649, ENSG00000140836, ENSG00000153814, ENSG00000177311, ENSG00000134317, ENSG00000137166, ENSG00000198740, ENSG00000101493, ENSG00000125520, ENSG00000167034, ENSG00000108753, ENSG00000147862, ENSG0000…	176	1906	11767	1.01725	1	0.990097	99.9999
GOTERM_BP_FAT	GO:0009416~response to light stimulus	3	1.27119	0.562008	ENSG00000167083, ENSG00000110092, ENSG00000168906	176	126	11767	1.59186	1	0.990065	99.9999
GOTERM_BP_FAT	GO:0048732~gland development	3	1.27119	0.562008	ENSG00000167034, ENSG00000185950, ENSG00000070193	176	126	11767	1.59186	1	0.990065	99.9999
GOTERM_BP_FAT	GO:0043473~pigmentation	2	0.847458	0.562212	ENSG00000136997, ENSG00000115648	176	55	11767	2.4312	1	0.989893	99.9999
GOTERM_BP_FAT	GO:0016310~phosphorylation	12	5.08475	0.563858	ENSG00000005882, ENSG00000066468, ENSG00000133056, ENSG00000189056, ENSG00000138696, ENSG00000127914, ENSG00000105851, ENSG00000047936, ENSG00000110092, ENSG00000163785, ENSG00000164715, ENSG00000108798	176	750	11767	1.06973	1	0.989905	99.9999
GOTERM_MF_FAT	GO:0043566~structure-specific DNA binding	3	1.27119	0.563941	ENSG00000136997, ENSG00000147862, ENSG00000127989	164	130	11269	1.58569	1	0.985928	99.999
COG_ONTOLOGY	Translation, ribosomal structure and biogenesis	2	0.847458	0.56782	ENSG00000145996, ENSG00000171861	23	68	1828	2.3376	0.999982	0.973624	99.6129
GOTERM_BP_FAT	GO:0031329~regulation of cellular catabolic process	2	0.847458	0.568753	ENSG00000185950, ENSG00000068024	176	56	11767	2.38778	1	0.990327	99.9999
GOTERM_BP_FAT	GO:0000082~G1/S transition of mitotic cell cycle	2	0.847458	0.568753	ENSG00000110092, ENSG00000172201	176	56	11767	2.38778	1	0.990327	99.9999
GOTERM_BP_FAT	GO:0008643~carbohydrate transport	2	0.847458	0.568753	ENSG00000160190, ENSG00000121073	176	56	11767	2.38778	1	0.990327	99.9999
GOTERM_BP_FAT	GO:0051100~negative regulation of binding	2	0.847458	0.568753	ENSG00000142655, ENSG00000068024	176	56	11767	2.38778	1	0.990327	99.9999
GOTERM_BP_FAT	GO:0022604~regulation of cell morphogenesis	3	1.27119	0.570592	ENSG00000064300, ENSG00000179242, ENSG00000073712	176	128	11767	1.56698	1	0.990364	99.9999
GOTERM_BP_FAT	GO:0032446~protein modification by small protein conjugation	3	1.27119	0.570592	ENSG00000105879, ENSG00000101752, ENSG00000072803	176	128	11767	1.56698	1	0.990364	99.9999
GOTERM_CC_FAT	GO:0005938~cell cortex	3	1.27119	0.572977	ENSG00000111859, ENSG00000196586, ENSG00000073712	160	132	10979	1.55952	1	0.96058	99.9981
INTERPRO	IPR011029:DEATH-like	2	0.847458	0.573649	ENSG00000064300, ENSG00000120889	208	59	14459	2.35642	1	0.997193	99.9994
GOTERM_CC_FAT	GO:0005887~integral to plasma membrane	16	6.77966	0.574665	ENSG00000146477, ENSG00000064300, ENSG00000168899, ENSG00000138696, ENSG00000179242, ENSG00000112337, ENSG00000197081, ENSG00000047936, ENSG00000120903, ENSG00000167085, ENSG00000026559, ENSG00000163785, ENSG00000112499, ENSG00000091409, ENSG00000137809, ENSG00000175003	160	1058	10979	1.03771	1	0.959045	99.9982
GOTERM_BP_FAT	GO:0042158~lipoprotein biosynthetic process	2	0.847458	0.575197	ENSG00000101126, ENSG00000000419	176	57	11767	2.34589	1	0.990736	99.9999
GOTERM_BP_FAT	GO:0043280~positive regulation of caspase activity	2	0.847458	0.575197	ENSG00000136997, ENSG00000120889	176	57	11767	2.34589	1	0.990736	99.9999
GOTERM_BP_FAT	GO:0010952~positive regulation of peptidase activity	2	0.847458	0.575197	ENSG00000136997, ENSG00000120889	176	57	11767	2.34589	1	0.990736	99.9999
GOTERM_BP_FAT	GO:0016192~vesicle-mediated transport	9	3.81356	0.576869	ENSG00000042832, ENSG00000168899, ENSG00000164597, ENSG00000197081, ENSG00000047932, ENSG00000184743, ENSG00000196586, ENSG00000118640, ENSG00000166747	176	550	11767	1.09404	1	0.990753	99.9999
SP_PIR_KEYWORDS	hydroxylation	2	0.847458	0.577041	ENSG00000187498, ENSG00000108821	223	63	16396	2.33412	1	0.954023	99.9988
SP_PIR_KEYWORDS	angiogenesis	2	0.847458	0.577041	ENSG00000187498, ENSG00000163874	223	63	16396	2.33412	1	0.954023	99.9988
GOTERM_BP_FAT	GO:0000902~cell morphogenesis	6	2.54237	0.578661	ENSG00000064300, ENSG00000189056, ENSG00000138696, ENSG00000179242, ENSG00000163785, ENSG00000125398	176	342	11767	1.17295	1	0.990784	99.9999
GOTERM_BP_FAT	GO:0007507~heart development	4	1.69492	0.581358	ENSG00000137166, ENSG00000101752, ENSG00000167034, ENSG00000125398	176	202	11767	1.32392	1	0.990923	99.9999
GOTERM_BP_FAT	GO:0006308~DNA catabolic process	2	0.847458	0.581546	ENSG00000136997, ENSG00000160049	176	58	11767	2.30545	1	0.990766	99.9999
GOTERM_BP_FAT	GO:0050769~positive regulation of neurogenesis	2	0.847458	0.581546	ENSG00000064300, ENSG00000179242	176	58	11767	2.30545	1	0.990766	99.9999
GOTERM_CC_FAT	GO:0016459~myosin complex	2	0.847458	0.584247	ENSG00000041515, ENSG00000196586	160	60	10979	2.28729	1	0.960345	99.9987
SP_PIR_KEYWORDS	ligase	5	2.11864	0.584445	ENSG00000105879, ENSG00000101752, ENSG00000165406, ENSG00000115486, ENSG00000175764	223	301	16396	1.22134	1	0.955041	99.999
GOTERM_BP_FAT	GO:0008380~RNA splicing	5	2.11864	0.584993	ENSG00000168883, ENSG00000140830, ENSG00000179409, ENSG00000140829, ENSG00000184209, ENSG00000004846	176	274	11767	1.22004	1	0.990994	99.9999
GOTERM_CC_FAT	GO:0031252~cell leading edge	3	1.27119	0.585254	ENSG00000111859, ENSG00000196586, ENSG00000108798	160	135	10979	1.52486	1	0.958625	99.9987
SP_PIR_KEYWORDS	cytoplasmic vesicle	4	1.69492	0.587273	ENSG00000165406, ENSG00000170743, ENSG00000196586, ENSG00000166747	223	224	16396	1.31294	1	0.954318	99.9991
GOTERM_BP_FAT	GO:0046546~development of primary male sexual characteristics	2	0.847458	0.5878	ENSG00000110092, ENSG00000125398	176	59	11767	2.26637	1	0.991144	99.9999
GOTERM_BP_FAT	GO:0060562~epithelial tube morphogenesis	2	0.847458	0.5878	ENSG00000101752, ENSG00000005073	176	59	11767	2.26637	1	0.991144	99.9999
GOTERM_BP_FAT	GO:0070271~protein complex biogenesis	8	3.38983	0.588697	ENSG00000005020, ENSG00000142655, ENSG00000136997, ENSG00000198625, ENSG00000047932, ENSG00000184743, ENSG00000118640, ENSG00000112242	176	486	11767	1.10054	1	0.991075	99.9999
GOTERM_BP_FAT	GO:0006461~protein complex assembly	8	3.38983	0.588697	ENSG00000005020, ENSG00000142655, ENSG00000136997, ENSG00000198625, ENSG00000047932, ENSG00000184743, ENSG00000118640, ENSG00000112242	176	486	11767	1.10054	1	0.991075	99.9999
UP_SEQ_FEATURE	disulfide bond	28	11.8644	0.590726	ENSG00000064300, ENSG00000066468, ENSG00000197081, ENSG00000187498, ENSG00000187008, ENSG00000168743, ENSG00000147655, ENSG00000167751, ENSG00000145934, ENSG00000196917, ENSG00000120903, ENSG00000124217, ENSG00000137809, ENSG00000101670, ENSG00000042832, ENSG00000115486, ENSG00000123643, ENSG00000007129, ENSG00000164465, ENSG00000108821, ENSG00000167642, ENSG00000189056, ENSG00000096088, ENSG0000…	223	2047	16383	1.00491	1	0.99994	99.9999
GOTERM_BP_FAT	GO:0065003~macromolecular complex assembly	10	4.23729	0.592154	ENSG00000005020, ENSG00000142655, ENSG00000136997, ENSG00000168883, ENSG00000198625, ENSG00000179409, ENSG00000047932, ENSG00000184743, ENSG00000118640, ENSG00000112242	176	627	11767	1.06632	1	0.991298	100
SP_PIR_KEYWORDS	gtp-binding	5	2.11864	0.592295	ENSG00000008853, ENSG00000132394, ENSG00000139832, ENSG00000184743, ENSG00000101246	223	304	16396	1.20929	1	0.954458	99.9993
SP_PIR_KEYWORDS	cytoskeleton	9	3.81356	0.592565	ENSG00000111859, ENSG00000127914, ENSG00000138162, ENSG00000175764, ENSG00000151474, ENSG00000111913, ENSG00000091409, ENSG00000011454, ENSG00000073712	223	613	16396	1.07948	1	0.952772	99.9993
GOTERM_CC_FAT	GO:0031966~mitochondrial membrane	6	2.54237	0.593543	ENSG00000115840, ENSG00000147454, ENSG00000114120, ENSG00000167085, ENSG00000102967, ENSG00000177370	160	357	10979	1.15326	1	0.959532	99.999
SP_PIR_KEYWORDS	chloride	2	0.847458	0.594055	ENSG00000091138, ENSG00000001626	223	66	16396	2.22802	1	0.951558	99.9993
UP_SEQ_FEATURE	metal ion-binding site:Zinc 2	2	0.847458	0.594348	ENSG00000189056, ENSG00000020256	223	66	16383	2.22625	1	0.999938	99.9999
GOTERM_MF_FAT	GO:0031420~alkali metal ion binding	4	1.69492	0.595442	ENSG00000112337, ENSG00000068024, ENSG00000168906, ENSG00000026559	164	212	11269	1.29648	1	0.989806	99.9996
GOTERM_BP_FAT	GO:0010817~regulation of hormone levels	3	1.27119	0.595612	ENSG00000042832, ENSG00000189056, ENSG00000108753	176	134	11767	1.49682	1	0.991518	100
KEGG_PATHWAY	hsa04662:B cell receptor signaling pathway	2	0.847458	0.596176	ENSG00000105851, ENSG00000101096	58	69	4400	2.1989	1	0.892011	99.9936
GOTERM_CC_FAT	GO:0031253~cell projection membrane	2	0.847458	0.596267	ENSG00000091138, ENSG00000196586	160	62	10979	2.21351	1	0.958476	99.9991
INTERPRO	IPR011511:Variant SH3	2	0.847458	0.597643	ENSG00000150672, ENSG00000128512	208	63	14459	2.20681	1	0.997929	99.9998
GOTERM_BP_FAT	GO:0006605~protein targeting	4	1.69492	0.598008	ENSG00000142655, ENSG00000196586, ENSG00000070193, ENSG00000115648	176	207	11767	1.29194	1	0.991618	100
UP_SEQ_FEATURE	DNA-binding region:Homeobox	3	1.27119	0.598554	ENSG00000167034, ENSG00000101126, ENSG00000005073	223	148	16383	1.48918	1	0.999937	99.9999
GOTERM_BP_FAT	GO:0006351~transcription, DNA-dependent	5	2.11864	0.59934	ENSG00000146592, ENSG00000136997, ENSG00000127989, ENSG00000112242, ENSG00000140836	176	279	11767	1.19817	1	0.991602	100
UP_SEQ_FEATURE	zinc finger region:C4-type	2	0.847458	0.599867	ENSG00000101868, ENSG00000153317	223	67	16383	2.19303	1	0.999931	99.9999
GOTERM_BP_FAT	GO:0009116~nucleoside metabolic process	2	0.847458	0.600031	ENSG00000168906, ENSG00000102967	176	61	11767	2.19206	1	0.991516	100
GOTERM_BP_FAT	GO:0007292~female gamete generation	2	0.847458	0.600031	ENSG00000138696, ENSG00000118689	176	61	11767	2.19206	1	0.991516	100
GOTERM_BP_FAT	GO:0033273~response to vitamin	2	0.847458	0.600031	ENSG00000110092, ENSG00000172819	176	61	11767	2.19206	1	0.991516	100
GOTERM_MF_FAT	GO:0022890~inorganic cation transmembrane transporter activity	3	1.27119	0.600503	ENSG00000146477, ENSG00000123643, ENSG00000147454	164	139	11269	1.48302	1	0.989824	99.9997
GOTERM_BP_FAT	GO:0042493~response to drug	4	1.69492	0.601287	ENSG00000110092, ENSG00000068024, ENSG00000168906, ENSG00000001626	176	208	11767	1.28573	1	0.991492	100
KEGG_PATHWAY	hsa04370:VEGF signaling pathway	2	0.847458	0.601491	ENSG00000105851, ENSG00000101096	58	70	4400	2.16749	1	0.888287	99.9945
GOTERM_CC_FAT	GO:0031967~organelle envelope	9	3.81356	0.601735	ENSG00000101868, ENSG00000115840, ENSG00000147454, ENSG00000197081, ENSG00000114120, ENSG00000167085, ENSG00000102967, ENSG00000196586, ENSG00000177370	160	577	10979	1.07031	1	0.95843	99.9992
INTERPRO	IPR002219:Protein kinase C-like, phorbol ester/diacylglycerol binding	2	0.847458	0.603429	ENSG00000106069, ENSG00000136205	208	64	14459	2.17233	1	0.997939	99.9998
SP_PIR_KEYWORDS	mitochondrion	11	4.66102	0.604273	ENSG00000005882, ENSG00000115840, ENSG00000147454, ENSG00000114120, ENSG00000111913, ENSG00000068615, ENSG00000167085, ENSG00000102967, ENSG00000127989, ENSG00000177370, ENSG00000167699	223	773	16396	1.04628	1	0.953812	99.9995
SP_PIR_KEYWORDS	extracellular matrix	4	1.69492	0.605219	ENSG00000189056, ENSG00000187498, ENSG00000168743, ENSG00000108821	223	230	16396	1.27869	1	0.952443	99.9995
UP_SEQ_FEATURE	metal ion-binding site:Zinc 1	2	0.847458	0.605311	ENSG00000189056, ENSG00000020256	223	68	16383	2.16078	1	0.999932	99.9999
GOTERM_CC_FAT	GO:0031975~envelope	9	3.81356	0.605687	ENSG00000101868, ENSG00000115840, ENSG00000147454, ENSG00000197081, ENSG00000114120, ENSG00000167085, ENSG00000102967, ENSG00000196586, ENSG00000177370	160	579	10979	1.06661	1	0.957864	99.9993
GOTERM_BP_FAT	GO:0008104~protein localization	13	5.50847	0.60573	ENSG00000142655, ENSG00000139832, ENSG00000196586, ENSG00000166747, ENSG00000115648, ENSG00000108821, ENSG00000057608, ENSG00000164597, ENSG00000141252, ENSG00000068615, ENSG00000070193, ENSG00000047932, ENSG00000177370	176	843	11767	1.03102	1	0.991816	100
GOTERM_BP_FAT	GO:0042063~gliogenesis	2	0.847458	0.60601	ENSG00000102606, ENSG00000189056	176	62	11767	2.15671	1	0.991689	100
KEGG_PATHWAY	hsa04070:Phosphatidylinositol signaling system	2	0.847458	0.606736	ENSG00000133056, ENSG00000105851	58	71	4400	2.13696	1	0.884659	99.9952
SP_PIR_KEYWORDS	disulfide bond	29	12.2881	0.606786	ENSG00000064300, ENSG00000066468, ENSG00000197081, ENSG00000187498, ENSG00000187008, ENSG00000168743, ENSG00000147655, ENSG00000167751, ENSG00000145934, ENSG00000196917, ENSG00000120903, ENSG00000124217, ENSG00000137809, ENSG00000101670, ENSG00000042832, ENSG00000173612, ENSG00000115486, ENSG00000123643, ENSG00000007129, ENSG00000164465, ENSG00000108821, ENSG00000167642, ENSG00000189056, ENSG0000…	223	2139	16396	0.996828	1	0.951318	99.9995
GOTERM_MF_FAT	GO:0015297~antiporter activity	2	0.847458	0.607462	ENSG00000091138, ENSG00000181045	164	64	11269	2.14729	1	0.990089	99.9998
GOTERM_BP_FAT	GO:0007067~mitosis	4	1.69492	0.607791	ENSG00000111859, ENSG00000140830, ENSG00000136982, ENSG00000183955	176	210	11767	1.27348	1	0.991725	100
GOTERM_BP_FAT	GO:0000280~nuclear division	4	1.69492	0.607791	ENSG00000111859, ENSG00000140830, ENSG00000136982, ENSG00000183955	176	210	11767	1.27348	1	0.991725	100
GOTERM_BP_FAT	GO:0009968~negative regulation of signal transduction	4	1.69492	0.607791	ENSG00000091844, ENSG00000064300, ENSG00000197114, ENSG00000110092	176	210	11767	1.27348	1	0.991725	100
GOTERM_BP_FAT	GO:0032774~RNA biosynthetic process	5	2.11864	0.607806	ENSG00000146592, ENSG00000136997, ENSG00000127989, ENSG00000112242, ENSG00000140836	176	282	11767	1.18542	1	0.991569	100
SP_PIR_KEYWORDS	ATP	4	1.69492	0.60816	ENSG00000066468, ENSG00000047936, ENSG00000168906, ENSG00000163785	223	231	16396	1.27315	1	0.950118	99.9996
SP_PIR_KEYWORDS	translocation	2	0.847458	0.610388	ENSG00000142655, ENSG00000177370	223	69	16396	2.13115	1	0.949271	99.9996
UP_SEQ_FEATURE	short sequence motif:PDZ-binding	2	0.847458	0.610682	ENSG00000170579, ENSG00000001626	223	69	16383	2.12946	1	0.999933	99.9999
UP_SEQ_FEATURE	short sequence motif:Nuclear localization signal	5	2.11864	0.610895	ENSG00000132394, ENSG00000125520, ENSG00000198625, ENSG00000101096, ENSG00000118689	223	311	16383	1.18113	1	0.999925	99.9999
GOTERM_BP_FAT	GO:0009259~ribonucleotide metabolic process	3	1.27119	0.611681	ENSG00000166377, ENSG00000054793, ENSG00000102967	176	138	11767	1.45343	1	0.991832	100
GOTERM_BP_FAT	GO:0031099~regeneration	2	0.847458	0.611901	ENSG00000110092, ENSG00000070193	176	63	11767	2.12247	1	0.991701	100
KEGG_PATHWAY	hsa05412:Arrhythmogenic right ventricular cardiomyopathy (ARVC)	2	0.847458	0.611915	ENSG00000091409, ENSG00000137809	58	72	4400	2.10728	1	0.881126	99.9958
GOTERM_BP_FAT	GO:0006974~response to DNA damage stimulus	6	2.54237	0.61193	ENSG00000101868, ENSG00000182185, ENSG00000110092, ENSG00000118689, ENSG00000196586, ENSG00000080546	176	355	11767	1.12999	1	0.991548	100
GOTERM_MF_FAT	GO:0000287~magnesium ion binding	7	2.9661	0.612042	ENSG00000068654, ENSG00000166377, ENSG00000138696, ENSG00000054793, ENSG00000168906, ENSG00000137809, ENSG00000163874	164	438	11269	1.09816	1	0.990061	99.9998
GOTERM_CC_FAT	GO:0030133~transport vesicle	2	0.847458	0.613653	ENSG00000197081, ENSG00000047932	160	65	10979	2.11135	1	0.958775	99.9995
GOTERM_CC_FAT	GO:0031226~intrinsic to plasma membrane	16	6.77966	0.613721	ENSG00000146477, ENSG00000064300, ENSG00000168899, ENSG00000138696, ENSG00000179242, ENSG00000112337, ENSG00000197081, ENSG00000047936, ENSG00000120903, ENSG00000167085, ENSG00000026559, ENSG00000163785, ENSG00000112499, ENSG00000091409, ENSG00000137809, ENSG00000175003	160	1084	10979	1.01282	1	0.95685	99.9995
UP_SEQ_FEATURE	domain:F-box	2	0.847458	0.61598	ENSG00000072803, ENSG00000203734	223	70	16383	2.09904	1	0.999926	100
GOTERM_BP_FAT	GO:0007169~transmembrane receptor protein tyrosine kinase signaling pathway	4	1.69492	0.617416	ENSG00000066468, ENSG00000047936, ENSG00000185950, ENSG00000070193	176	213	11767	1.25555	1	0.991984	100
GOTERM_BP_FAT	GO:0005996~monosaccharide metabolic process	4	1.69492	0.617416	ENSG00000005882, ENSG00000136997, ENSG00000185950, ENSG00000167080	176	213	11767	1.25555	1	0.991984	100
OMIM_DISEASE	A Genome-Wide Association Study Identifies Protein Quantitative Trait Loci (pQTLs)	2	0.847458	0.61789	ENSG00000152292, ENSG00000150672	57	47	2787	2.08063	1	0.999994	99.9985
GOTERM_MF_FAT	GO:0060090~molecular adaptor activity	2	0.847458	0.6188	ENSG00000005020, ENSG00000106069	164	66	11269	2.08222	1	0.99031	99.9998
GOTERM_MF_FAT	GO:0004842~ubiquitin-protein ligase activity	3	1.27119	0.619805	ENSG00000105879, ENSG00000101752, ENSG00000072803	164	144	11269	1.43153	1	0.989852	99.9998
GOTERM_BP_FAT	GO:0000087~M phase of mitotic cell cycle	4	1.69492	0.620589	ENSG00000111859, ENSG00000140830, ENSG00000136982, ENSG00000183955	176	214	11767	1.24968	1	0.992167	100
INTERPRO	IPR001478:PDZ/DHR/GLGF	3	1.27119	0.621307	ENSG00000163110, ENSG00000150672, ENSG00000047932	208	146	14459	1.42838	1	0.998334	99.9999
GOTERM_BP_FAT	GO:0006839~mitochondrial transport	2	0.847458	0.62342	ENSG00000115840, ENSG00000147454	176	65	11767	2.05717	1	0.992312	100
GOTERM_MF_FAT	GO:0031404~chloride ion binding	2	0.847458	0.624346	ENSG00000091138, ENSG00000001626	164	67	11269	2.05115	1	0.989842	99.9999
GOTERM_CC_FAT	GO:0042995~cell projection	10	4.23729	0.62444	ENSG00000091138, ENSG00000111859, ENSG00000102606, ENSG00000189056, ENSG00000175764, ENSG00000111913, ENSG00000047932, ENSG00000196586, ENSG00000128512, ENSG00000108798	160	661	10979	1.03811	1	0.958821	99.9996
INTERPRO	IPR001715:Calponin-like actin-binding	2	0.847458	0.625754	ENSG00000102606, ENSG00000115504	208	68	14459	2.04454	1	0.998307	99.9999
INTERPRO	IPR001810:Cyclin-like F-box	2	0.847458	0.625754	ENSG00000072803, ENSG00000203734	208	68	14459	2.04454	1	0.998307	99.9999
KEGG_PATHWAY	hsa04062:Chemokine signaling pathway	3	1.27119	0.627148	ENSG00000105851, ENSG00000167083, ENSG00000118689	58	162	4400	1.40485	1	0.884652	99.9973
GOTERM_BP_FAT	GO:0016044~membrane organization	6	2.54237	0.629208	ENSG00000163746, ENSG00000197081, ENSG00000068615, ENSG00000196586, ENSG00000118640, ENSG00000166747	176	362	11767	1.10814	1	0.992747	100
GOTERM_MF_FAT	GO:0032553~ribonucleotide binding	25	10.5932	0.629315	ENSG00000008853, ENSG00000182185, ENSG00000066468, ENSG00000133056, ENSG00000138696, ENSG00000105851, ENSG00000140829, ENSG00000184209, ENSG00000184743, ENSG00000163785, ENSG00000196586, ENSG00000166377, ENSG00000155085, ENSG00000041515, ENSG00000047936, ENSG00000004846, ENSG00000101246, ENSG00000124217, ENSG00000005882, ENSG00000139832, ENSG00000054793, ENSG00000132394, ENSG00000127914, ENSG0000…	164	1736	11269	0.989537	1	0.989892	99.9999
GOTERM_MF_FAT	GO:0032555~purine ribonucleotide binding	25	10.5932	0.629315	ENSG00000008853, ENSG00000182185, ENSG00000066468, ENSG00000133056, ENSG00000138696, ENSG00000105851, ENSG00000140829, ENSG00000184209, ENSG00000184743, ENSG00000163785, ENSG00000196586, ENSG00000166377, ENSG00000155085, ENSG00000041515, ENSG00000047936, ENSG00000004846, ENSG00000101246, ENSG00000124217, ENSG00000005882, ENSG00000139832, ENSG00000054793, ENSG00000132394, ENSG00000127914, ENSG0000…	164	1736	11269	0.989537	1	0.989892	99.9999
GOTERM_CC_FAT	GO:0005792~microsome	4	1.69492	0.630667	ENSG00000133056, ENSG00000197977, ENSG00000167080, ENSG00000121073	160	223	10979	1.23083	1	0.959181	99.9997
GOTERM_MF_FAT	GO:0008236~serine-type peptidase activity	3	1.27119	0.63104	ENSG00000167751, ENSG00000189056, ENSG00000142515	164	147	11269	1.40231	1	0.989535	99.9999
GOTERM_BP_FAT	GO:0043434~response to peptide hormone stimulus	3	1.27119	0.631081	ENSG00000185950, ENSG00000001626, ENSG00000108821	176	143	11767	1.40261	1	0.992792	100
GOTERM_MF_FAT	GO:0016879~ligase activity, forming carbon-nitrogen bonds	4	1.69492	0.632794	ENSG00000105879, ENSG00000101752, ENSG00000072803, ENSG00000175764	164	224	11269	1.22703	1	0.98918	99.9999
SMART	SM00109:C1	2	0.847458	0.633799	ENSG00000106069, ENSG00000136205	127	64	8122	1.99852	1	0.990308	99.999
UP_SEQ_FEATURE	lipid moiety-binding region:S-palmitoyl cysteine	3	1.27119	0.634157	ENSG00000163746, ENSG00000203896, ENSG00000150672	223	158	16383	1.39493	1	0.999948	100
GOTERM_BP_FAT	GO:0010975~regulation of neuron projection development	2	0.847458	0.6346	ENSG00000064300, ENSG00000179242	176	67	11767	1.99576	1	0.992995	100
GOTERM_BP_FAT	GO:0046661~male sex differentiation	2	0.847458	0.6346	ENSG00000110092, ENSG00000125398	176	67	11767	1.99576	1	0.992995	100
GOTERM_BP_FAT	GO:0048839~inner ear development	2	0.847458	0.6346	ENSG00000196586, ENSG00000070193	176	67	11767	1.99576	1	0.992995	100
GOTERM_BP_FAT	GO:0022618~ribonucleoprotein complex assembly	2	0.847458	0.6346	ENSG00000168883, ENSG00000179409	176	67	11767	1.99576	1	0.992995	100
GOTERM_BP_FAT	GO:0006006~glucose metabolic process	3	1.27119	0.63487	ENSG00000005882, ENSG00000136997, ENSG00000185950	176	144	11767	1.39287	1	0.992888	100
GOTERM_BP_FAT	GO:0048285~organelle fission	4	1.69492	0.636186	ENSG00000111859, ENSG00000140830, ENSG00000136982, ENSG00000183955	176	219	11767	1.22115	1	0.99288	100
GOTERM_MF_FAT	GO:0017171~serine hydrolase activity	3	1.27119	0.638386	ENSG00000167751, ENSG00000189056, ENSG00000142515	164	149	11269	1.38349	1	0.989337	99.9999
GOTERM_BP_FAT	GO:0016053~organic acid biosynthetic process	3	1.27119	0.638629	ENSG00000197977, ENSG00000168906, ENSG00000164181	176	145	11767	1.38327	1	0.992981	100
GOTERM_BP_FAT	GO:0046394~carboxylic acid biosynthetic process	3	1.27119	0.638629	ENSG00000197977, ENSG00000168906, ENSG00000164181	176	145	11767	1.38327	1	0.992981	100
GOTERM_BP_FAT	GO:0042113~B cell activation	2	0.847458	0.640065	ENSG00000005020, ENSG00000068024	176	68	11767	1.96641	1	0.992986	100
GOTERM_CC_FAT	GO:0030027~lamellipodium	2	0.847458	0.640993	ENSG00000111859, ENSG00000108798	160	70	10979	1.96054	1	0.960991	99.9998
SP_PIR_KEYWORDS	calcium	10	4.23729	0.644243	ENSG00000163746, ENSG00000181523, ENSG00000189056, ENSG00000115840, ENSG00000179242, ENSG00000170743, ENSG00000168743, ENSG00000115756, ENSG00000091409, ENSG00000137809	223	720	16396	1.02118	1	0.96049	99.9999
UP_SEQ_FEATURE	compositionally biased region:Ser-rich	6	2.54237	0.645103	ENSG00000179242, ENSG00000170477, ENSG00000151474, ENSG00000164651, ENSG00000128512, ENSG00000170421	223	405	16383	1.08839	1	0.999957	100
GOTERM_MF_FAT	GO:0003779~actin binding	5	2.11864	0.645162	ENSG00000163110, ENSG00000041515, ENSG00000196586, ENSG00000115648, ENSG00000122574	164	304	11269	1.13015	1	0.989652	99.9999
GOTERM_BP_FAT	GO:0001568~blood vessel development	4	1.69492	0.64533	ENSG00000101752, ENSG00000070193, ENSG00000163874, ENSG00000108821	176	222	11767	1.20465	1	0.993347	100
GOTERM_BP_FAT	GO:0006366~transcription from RNA polymerase II promoter	4	1.69492	0.64533	ENSG00000146592, ENSG00000136997, ENSG00000112242, ENSG00000140836	176	222	11767	1.20465	1	0.993347	100
GOTERM_MF_FAT	GO:0042625~ATPase activity, coupled to transmembrane movement of ions	2	0.847458	0.645741	ENSG00000166377, ENSG00000054793	164	71	11269	1.93559	1	0.989165	99.9999
GOTERM_BP_FAT	GO:0007346~regulation of mitotic cell cycle	3	1.27119	0.646055	ENSG00000136997, ENSG00000041515, ENSG00000110092	176	147	11767	1.36445	1	0.993288	100
SP_PIR_KEYWORDS	signal	36	15.2542	0.646069	ENSG00000064300, ENSG00000066468, ENSG00000181523, ENSG00000138696, ENSG00000197081, ENSG00000187498, ENSG00000187008, ENSG00000163785, ENSG00000168743, ENSG00000147655, ENSG00000076356, ENSG00000167105, ENSG00000167751, ENSG00000047936, ENSG00000120903, ENSG00000137809, ENSG00000101670, ENSG00000042832, ENSG00000173612, ENSG00000176358, ENSG00000179242, ENSG00000187871, ENSG00000112706, ENSG0000…	223	2707	16396	0.977794	1	0.959659	99.9999
KEGG_PATHWAY	hsa05410:Hypertrophic cardiomyopathy (HCM)	2	0.847458	0.646332	ENSG00000091409, ENSG00000137809	58	79	4400	1.92056	1	0.890907	99.9985
GOTERM_CC_FAT	GO:0031410~cytoplasmic vesicle	9	3.81356	0.64783	ENSG00000133056, ENSG00000101752, ENSG00000165406, ENSG00000197081, ENSG00000170743, ENSG00000001626, ENSG00000047932, ENSG00000196586, ENSG00000166747	160	601	10979	1.02757	1	0.961596	99.9998
UP_SEQ_FEATURE	signal peptide	36	15.2542	0.648023	ENSG00000064300, ENSG00000066468, ENSG00000181523, ENSG00000138696, ENSG00000197081, ENSG00000187498, ENSG00000187008, ENSG00000163785, ENSG00000168743, ENSG00000147655, ENSG00000076356, ENSG00000167105, ENSG00000167751, ENSG00000047936, ENSG00000120903, ENSG00000137809, ENSG00000101670, ENSG00000042832, ENSG00000173612, ENSG00000176358, ENSG00000179242, ENSG00000187871, ENSG00000112706, ENSG0000…	223	2707	16383	0.977019	1	0.999955	100
KEGG_PATHWAY	hsa04010:MAPK signaling pathway	4	1.69492	0.648056	ENSG00000136997, ENSG00000066468, ENSG00000101096, ENSG00000070193	58	254	4400	1.19468	1	0.885696	99.9985
GOTERM_CC_FAT	GO:0005578~proteinaceous extracellular matrix	5	2.11864	0.648762	ENSG00000189056, ENSG00000187498, ENSG00000112706, ENSG00000168743, ENSG00000108821	160	305	10979	1.1249	1	0.960193	99.9998
SMART	SM00256:FBOX	2	0.847458	0.650712	ENSG00000072803, ENSG00000203734	127	67	8122	1.90904	1	0.990674	99.9994
GOTERM_BP_FAT	GO:0030278~regulation of ossification	2	0.847458	0.650753	ENSG00000138696, ENSG00000125398	176	70	11767	1.91023	1	0.993587	100
GOTERM_BP_FAT	GO:0000302~response to reactive oxygen species	2	0.847458	0.650753	ENSG00000158615, ENSG00000108821	176	70	11767	1.91023	1	0.993587	100
GOTERM_BP_FAT	GO:0009309~amine biosynthetic process	2	0.847458	0.650753	ENSG00000115758, ENSG00000168906	176	70	11767	1.91023	1	0.993587	100
GOTERM_CC_FAT	GO:0042598~vesicular fraction	4	1.69492	0.651451	ENSG00000133056, ENSG00000197977, ENSG00000167080, ENSG00000121073	160	230	10979	1.19337	1	0.959404	99.9999
GOTERM_BP_FAT	GO:0006575~cellular amino acid derivative metabolic process	3	1.27119	0.653361	ENSG00000115758, ENSG00000102230, ENSG00000168906	176	149	11767	1.34613	1	0.993697	100
GOTERM_CC_FAT	GO:0005740~mitochondrial envelope	6	2.54237	0.653387	ENSG00000115840, ENSG00000147454, ENSG00000114120, ENSG00000167085, ENSG00000102967, ENSG00000177370	160	382	10979	1.07778	1	0.958358	99.9999
GOTERM_BP_FAT	GO:0048469~cell maturation	2	0.847458	0.655978	ENSG00000006607, ENSG00000118689	176	71	11767	1.88332	1	0.993806	100
SMART	SM00033:CH	2	0.847458	0.656176	ENSG00000102606, ENSG00000115504	127	68	8122	1.88096	1	0.989699	99.9995
INTERPRO	IPR008160:Collagen triple helix repeat	2	0.847458	0.656919	ENSG00000187498, ENSG00000108821	208	74	14459	1.87877	1	0.998937	100
GOTERM_BP_FAT	GO:0001944~vasculature development	4	1.69492	0.657269	ENSG00000101752, ENSG00000070193, ENSG00000163874, ENSG00000108821	176	226	11767	1.18333	1	0.993801	100
GOTERM_MF_FAT	GO:0042802~identical protein binding	9	3.81356	0.657359	ENSG00000005882, ENSG00000137166, ENSG00000160049, ENSG00000106052, ENSG00000108753, ENSG00000100505, ENSG00000171206, ENSG00000184743, ENSG00000108821	164	607	11269	1.01882	1	0.990114	100
GOTERM_MF_FAT	GO:0005524~ATP binding	20	8.47458	0.663272	ENSG00000182185, ENSG00000005882, ENSG00000066468, ENSG00000133056, ENSG00000138696, ENSG00000054793, ENSG00000105851, ENSG00000140829, ENSG00000184209, ENSG00000163785, ENSG00000196586, ENSG00000166377, ENSG00000155085, ENSG00000041515, ENSG00000127914, ENSG00000047936, ENSG00000001626, ENSG00000168906, ENSG00000004846, ENSG00000124217, ENSG00000164715	164	1408	11269	0.976043	1	0.990327	100
INTERPRO	IPR013151:Immunoglobulin	3	1.27119	0.664051	ENSG00000066468, ENSG00000170866, ENSG00000007129	208	158	14459	1.31989	1	0.998975	100
SP_PIR_KEYWORDS	lipid degradation	2	0.847458	0.664873	ENSG00000101670, ENSG00000100523	223	80	16396	1.83812	1	0.964604	99.9999
GOTERM_MF_FAT	GO:0042803~protein homodimerization activity	5	2.11864	0.665287	ENSG00000005882, ENSG00000137166, ENSG00000108753, ENSG00000100505, ENSG00000171206	164	312	11269	1.10118	1	0.990064	100
GOTERM_MF_FAT	GO:0043167~ion binding	55	23.3051	0.665821	ENSG00000181523, ENSG00000105879, ENSG00000138696, ENSG00000168769, ENSG00000165406, ENSG00000115756, ENSG00000163746, ENSG00000101868, ENSG00000166377, ENSG00000177311, ENSG00000137166, ENSG00000106052, ENSG00000172819, ENSG00000091138, ENSG00000179242, ENSG00000164651, ENSG00000115648, ENSG00000140836, ENSG00000106069, ENSG00000198625, ENSG00000100505, ENSG00000168906, ENSG00000091409, ENSG0000…	164	3880	11269	0.97403	1	0.989611	100
GOTERM_MF_FAT	GO:0035257~nuclear hormone receptor binding	2	0.847458	0.665924	ENSG00000138162, ENSG00000172819	164	75	11269	1.83236	1	0.98909	100
SMART	SM00228:PDZ	3	1.27119	0.665991	ENSG00000163110, ENSG00000150672, ENSG00000047932	127	146	8122	1.3141	1	0.989301	99.9997
GOTERM_BP_FAT	GO:0006633~fatty acid biosynthetic process	2	0.847458	0.666197	ENSG00000197977, ENSG00000164181	176	73	11767	1.83172	1	0.994426	100
GOTERM_BP_FAT	GO:0000375~RNA splicing, via transesterification reactions	3	1.27119	0.667614	ENSG00000168883, ENSG00000179409, ENSG00000140829	176	153	11767	1.31094	1	0.994433	100
GOTERM_BP_FAT	GO:0000377~RNA splicing, via transesterification reactions with bulged adenosine as nucleophile	3	1.27119	0.667614	ENSG00000168883, ENSG00000179409, ENSG00000140829	176	153	11767	1.31094	1	0.994433	100
GOTERM_BP_FAT	GO:0000398~nuclear mRNA splicing, via spliceosome	3	1.27119	0.667614	ENSG00000168883, ENSG00000179409, ENSG00000140829	176	153	11767	1.31094	1	0.994433	100
GOTERM_BP_FAT	GO:0006396~RNA processing	8	3.38983	0.667663	ENSG00000168883, ENSG00000121067, ENSG00000140830, ENSG00000179409, ENSG00000140829, ENSG00000171861, ENSG00000184209, ENSG00000004846, ENSG00000124217	176	524	11767	1.02073	1	0.994331	100
SP_PIR_KEYWORDS	blocked amino end	2	0.847458	0.669433	ENSG00000187498, ENSG00000115756	223	81	16396	1.81542	1	0.964755	100
GOTERM_BP_FAT	GO:0010769~regulation of cell morphogenesis involved in differentiation	2	0.847458	0.671192	ENSG00000064300, ENSG00000179242	176	74	11767	1.80697	1	0.994506	100
KEGG_PATHWAY	hsa04012:ErbB signaling pathway	2	0.847458	0.673433	ENSG00000136997, ENSG00000105851	58	85	4400	1.78499	1	0.896296	99.9993
UP_SEQ_FEATURE	active site:Charge relay system	3	1.27119	0.673579	ENSG00000101670, ENSG00000167751, ENSG00000142515	223	170	16383	1.29647	1	0.999975	100
GOTERM_BP_FAT	GO:0032989~cellular component morphogenesis	6	2.54237	0.673721	ENSG00000064300, ENSG00000189056, ENSG00000138696, ENSG00000179242, ENSG00000163785, ENSG00000125398	176	381	11767	1.05288	1	0.9946	100
INTERPRO	IPR005225:Small GTP-binding protein	3	1.27119	0.674114	ENSG00000008853, ENSG00000139832, ENSG00000101246	208	161	14459	1.2953	1	0.999066	100
UP_SEQ_FEATURE	domain:Peptidase S1	2	0.847458	0.674223	ENSG00000167751, ENSG00000142515	223	82	16383	1.79186	1	0.999972	100
SP_PIR_KEYWORDS	cell division	4	1.69492	0.674319	ENSG00000111859, ENSG00000110092, ENSG00000183955, ENSG00000164649	223	255	16396	1.15333	1	0.965027	100
GOTERM_BP_FAT	GO:0016337~cell-cell adhesion	4	1.69492	0.674636	ENSG00000105879, ENSG00000138696, ENSG00000179242, ENSG00000125398	176	232	11767	1.15272	1	0.994569	100
GOTERM_BP_FAT	GO:0010648~negative regulation of cell communication	4	1.69492	0.674636	ENSG00000091844, ENSG00000064300, ENSG00000197114, ENSG00000110092	176	232	11767	1.15272	1	0.994569	100
GOTERM_BP_FAT	GO:0043281~regulation of caspase activity	2	0.847458	0.676113	ENSG00000136997, ENSG00000120889	176	75	11767	1.78288	1	0.994582	100
SP_PIR_KEYWORDS	immune response	3	1.27119	0.67628	ENSG00000203896, ENSG00000165406, ENSG00000170866	223	171	16396	1.28991	1	0.964371	100
GOTERM_BP_FAT	GO:0070647~protein modification by small protein conjugation or removal	3	1.27119	0.677993	ENSG00000105879, ENSG00000101752, ENSG00000072803	176	156	11767	1.28573	1	0.994627	100
GOTERM_CC_FAT	GO:0009986~cell surface	5	2.11864	0.6785	ENSG00000173612, ENSG00000066468, ENSG00000070193, ENSG00000091409, ENSG00000057608	160	317	10979	1.08231	1	0.965267	100
UP_SEQ_FEATURE	domain:EGF-like 2	2	0.847458	0.67866	ENSG00000145934, ENSG00000189056	223	83	16383	1.77027	1	0.999972	100
GOTERM_BP_FAT	GO:0051336~regulation of hydrolase activity	5	2.11864	0.678965	ENSG00000136997, ENSG00000153317, ENSG00000057608, ENSG00000120889, ENSG00000011454	176	309	11767	1.08184	1	0.994602	100
GOTERM_BP_FAT	GO:0031960~response to corticosteroid stimulus	2	0.847458	0.680961	ENSG00000110092, ENSG00000108821	176	76	11767	1.75942	1	0.994656	100
GOTERM_BP_FAT	GO:0030334~regulation of cell migration	3	1.27119	0.681394	ENSG00000105879, ENSG00000185950, ENSG00000108798	176	157	11767	1.27754	1	0.99459	100
KEGG_PATHWAY	hsa05414:Dilated cardiomyopathy	2	0.847458	0.682004	ENSG00000091409, ENSG00000137809	58	87	4400	1.74396	1	0.896013	99.9995
SP_PIR_KEYWORDS	collagen	2	0.847458	0.682745	ENSG00000187498, ENSG00000108821	223	84	16396	1.75059	1	0.965186	100
UP_SEQ_FEATURE	active site:Nucleophile	3	1.27119	0.682882	ENSG00000101670, ENSG00000186094, ENSG00000102967	223	173	16383	1.27398	1	0.999972	100
GOTERM_MF_FAT	GO:0019787~small conjugating protein ligase activity	3	1.27119	0.683372	ENSG00000105879, ENSG00000101752, ENSG00000072803	164	162	11269	1.27247	1	0.990791	100
SP_PIR_KEYWORDS	Protease	6	2.54237	0.683804	ENSG00000167751, ENSG00000186094, ENSG00000167642, ENSG00000189056, ENSG00000096088, ENSG00000142515	223	424	16396	1.04044	1	0.964267	100
INTERPRO	IPR000048:IQ calmodulin-binding region	2	0.847458	0.6855	ENSG00000041515, ENSG00000196586	208	80	14459	1.73786	1	0.999174	100
GOTERM_BP_FAT	GO:0042157~lipoprotein metabolic process	2	0.847458	0.685736	ENSG00000101126, ENSG00000000419	176	77	11767	1.73657	1	0.994824	100
GOTERM_BP_FAT	GO:0042770~DNA damage response, signal transduction	2	0.847458	0.685736	ENSG00000110092, ENSG00000196586	176	77	11767	1.73657	1	0.994824	100
GOTERM_MF_FAT	GO:0032559~adenyl ribonucleotide binding	20	8.47458	0.686533	ENSG00000182185, ENSG00000005882, ENSG00000066468, ENSG00000133056, ENSG00000138696, ENSG00000054793, ENSG00000105851, ENSG00000140829, ENSG00000184209, ENSG00000163785, ENSG00000196586, ENSG00000166377, ENSG00000155085, ENSG00000041515, ENSG00000127914, ENSG00000047936, ENSG00000001626, ENSG00000168906, ENSG00000004846, ENSG00000124217, ENSG00000164715	164	1427	11269	0.963047	1	0.990699	100
GOTERM_CC_FAT	GO:0044429~mitochondrial part	8	3.38983	0.68852	ENSG00000005882, ENSG00000115840, ENSG00000147454, ENSG00000114120, ENSG00000167085, ENSG00000102967, ENSG00000127989, ENSG00000177370	160	549	10979	0.999909	1	0.966943	100
SP_PIR_KEYWORDS	kinase	9	3.81356	0.689455	ENSG00000005882, ENSG00000066468, ENSG00000133056, ENSG00000138696, ENSG00000127914, ENSG00000105851, ENSG00000047936, ENSG00000163785, ENSG00000164715	223	669	16396	0.989121	1	0.964854	100
INTERPRO	IPR001314:Peptidase S1A, chymotrypsin	2	0.847458	0.690027	ENSG00000167751, ENSG00000142515	208	81	14459	1.71641	1	0.999167	100
GOTERM_BP_FAT	GO:0052548~regulation of endopeptidase activity	2	0.847458	0.690441	ENSG00000136997, ENSG00000120889	176	78	11767	1.71431	1	0.995076	100
GOTERM_BP_FAT	GO:0045786~negative regulation of cell cycle	2	0.847458	0.690441	ENSG00000064300, ENSG00000041515	176	78	11767	1.71431	1	0.995076	100
GOTERM_BP_FAT	GO:0033554~cellular response to stress	8	3.38983	0.692463	ENSG00000101868, ENSG00000182185, ENSG00000158615, ENSG00000110092, ENSG00000187871, ENSG00000118689, ENSG00000196586, ENSG00000080546	176	537	11767	0.996022	1	0.99513	100
UP_SEQ_FEATURE	compositionally biased region:Glu-rich	4	1.69492	0.692516	ENSG00000198740, ENSG00000155085, ENSG00000127914, ENSG00000196586	223	262	16383	1.12162	1	0.999976	100
GOTERM_CC_FAT	GO:0016604~nuclear body	3	1.27119	0.69379	ENSG00000136997, ENSG00000171206, ENSG00000179409	160	165	10979	1.24761	1	0.967144	100
GOTERM_CC_FAT	GO:0031982~vesicle	9	3.81356	0.694219	ENSG00000133056, ENSG00000101752, ENSG00000165406, ENSG00000197081, ENSG00000170743, ENSG00000001626, ENSG00000047932, ENSG00000196586, ENSG00000166747	160	627	10979	0.984958	1	0.965848	100
KEGG_PATHWAY	hsa04666:Fc gamma R-mediated phagocytosis	2	0.847458	0.694449	ENSG00000105851, ENSG00000153317	58	90	4400	1.68582	1	0.898388	99.9997
GOTERM_BP_FAT	GO:0048015~phosphoinositide-mediated signaling	2	0.847458	0.695075	ENSG00000133056, ENSG00000105851	176	79	11767	1.69261	1	0.995226	100
GOTERM_BP_FAT	GO:0003001~generation of a signal involved in cell-cell signaling	2	0.847458	0.695075	ENSG00000108753, ENSG00000196586	176	79	11767	1.69261	1	0.995226	100
SP_PIR_KEYWORDS	cell membrane	21	8.89831	0.695744	ENSG00000173612, ENSG00000066468, ENSG00000203896, ENSG00000133056, ENSG00000101752, ENSG00000170579, ENSG00000179242, ENSG00000181045, ENSG00000123643, ENSG00000184209, ENSG00000167695, ENSG00000150672, ENSG00000196586, ENSG00000185942, ENSG00000175003, ENSG00000168899, ENSG00000196917, ENSG00000167083, ENSG00000120903, ENSG00000004846, ENSG00000047932, ENSG00000091409	223	1614	16396	0.956641	1	0.965657	100
UP_SEQ_FEATURE	domain:EF-hand 3	2	0.847458	0.695813	ENSG00000115840, ENSG00000115756	223	87	16383	1.68888	1	0.999976	100
GOTERM_CC_FAT	GO:0005815~microtubule organizing center	4	1.69492	0.698431	ENSG00000127914, ENSG00000138162, ENSG00000175764, ENSG00000011454	160	247	10979	1.11123	1	0.965757	100
GOTERM_MF_FAT	GO:0043168~anion binding	2	0.847458	0.698533	ENSG00000091138, ENSG00000001626	164	82	11269	1.67594	1	0.991634	100
INTERPRO	IPR018114:Peptidase S1/S6, chymotrypsin/Hap, active site	2	0.847458	0.698889	ENSG00000167751, ENSG00000142515	208	83	14459	1.67505	1	0.99923	100
UP_SEQ_FEATURE	repeat:ANK 6	2	0.847458	0.699957	ENSG00000101752, ENSG00000041515	223	88	16383	1.66969	1	0.999976	100
GOTERM_BP_FAT	GO:0034613~cellular protein localization	6	2.54237	0.704203	ENSG00000142655, ENSG00000068615, ENSG00000196586, ENSG00000070193, ENSG00000166747, ENSG00000115648	176	395	11767	1.01556	1	0.995757	100
GOTERM_MF_FAT	GO:0008565~protein transporter activity	2	0.847458	0.707254	ENSG00000177370, ENSG00000166747	164	84	11269	1.63603	1	0.992165	100
GOTERM_MF_FAT	GO:0051427~hormone receptor binding	2	0.847458	0.707254	ENSG00000138162, ENSG00000172819	164	84	11269	1.63603	1	0.992165	100
GOTERM_MF_FAT	GO:0046872~metal ion binding	53	22.4576	0.70737	ENSG00000181523, ENSG00000105879, ENSG00000138696, ENSG00000168769, ENSG00000165406, ENSG00000115756, ENSG00000163746, ENSG00000101868, ENSG00000166377, ENSG00000177311, ENSG00000137166, ENSG00000106052, ENSG00000172819, ENSG00000179242, ENSG00000164651, ENSG00000115648, ENSG00000140836, ENSG00000106069, ENSG00000198625, ENSG00000100505, ENSG00000168906, ENSG00000091409, ENSG00000068654, ENSG0000…	164	3789	11269	0.961154	1	0.991772	100
GOTERM_BP_FAT	GO:0006865~amino acid transport	2	0.847458	0.708569	ENSG00000115840, ENSG00000123643	176	82	11767	1.63068	1	0.995954	100
GOTERM_BP_FAT	GO:0052547~regulation of peptidase activity	2	0.847458	0.708569	ENSG00000136997, ENSG00000120889	176	82	11767	1.63068	1	0.995954	100
GOTERM_BP_FAT	GO:0006352~transcription initiation	2	0.847458	0.708569	ENSG00000136997, ENSG00000112242	176	82	11767	1.63068	1	0.995954	100
SP_PIR_KEYWORDS	host-virus interaction	4	1.69492	0.708955	ENSG00000101868, ENSG00000177369, ENSG00000170421, ENSG00000140577	223	269	16396	1.0933	1	0.968604	100
SP_PIR_KEYWORDS	zymogen	3	1.27119	0.709084	ENSG00000167751, ENSG00000096088, ENSG00000142515	223	182	16396	1.21195	1	0.967515	100
GOTERM_BP_FAT	GO:0070727~cellular macromolecule localization	6	2.54237	0.710473	ENSG00000142655, ENSG00000068615, ENSG00000196586, ENSG00000070193, ENSG00000166747, ENSG00000115648	176	398	11767	1.00791	1	0.995995	100
SP_PIR_KEYWORDS	endoplasmic reticulum	9	3.81356	0.711292	ENSG00000133056, ENSG00000102230, ENSG00000197977, ENSG00000181045, ENSG00000115486, ENSG00000000419, ENSG00000121073, ENSG00000184743, ENSG00000164181	223	683	16396	0.968846	1	0.967068	100
GOTERM_BP_FAT	GO:0006796~phosphate metabolic process	13	5.50847	0.711339	ENSG00000005882, ENSG00000066468, ENSG00000133056, ENSG00000189056, ENSG00000138696, ENSG00000127914, ENSG00000112337, ENSG00000105851, ENSG00000047936, ENSG00000110092, ENSG00000163785, ENSG00000164715, ENSG00000108798	176	911	11767	0.954065	1	0.995973	100
GOTERM_BP_FAT	GO:0006793~phosphorus metabolic process	13	5.50847	0.711339	ENSG00000005882, ENSG00000066468, ENSG00000133056, ENSG00000189056, ENSG00000138696, ENSG00000127914, ENSG00000112337, ENSG00000105851, ENSG00000047936, ENSG00000110092, ENSG00000163785, ENSG00000164715, ENSG00000108798	176	911	11767	0.954065	1	0.995973	100
GOTERM_BP_FAT	GO:0007167~enzyme linked receptor protein signaling pathway	5	2.11864	0.712166	ENSG00000066468, ENSG00000138696, ENSG00000047936, ENSG00000185950, ENSG00000070193	176	323	11767	1.03495	1	0.995948	100
GOTERM_BP_FAT	GO:0007160~cell-matrix adhesion	2	0.847458	0.712934	ENSG00000091409, ENSG00000137809	176	83	11767	1.61104	1	0.99592	100
GOTERM_BP_FAT	GO:0006754~ATP biosynthetic process	2	0.847458	0.712934	ENSG00000166377, ENSG00000054793	176	83	11767	1.61104	1	0.99592	100
GOTERM_BP_FAT	GO:0044265~cellular macromolecule catabolic process	10	4.23729	0.714623	ENSG00000064300, ENSG00000136997, ENSG00000105879, ENSG00000101752, ENSG00000160049, ENSG00000168883, ENSG00000121067, ENSG00000072803, ENSG00000165406, ENSG00000107669	176	696	11767	0.960603	1	0.995949	100
GOTERM_MF_FAT	GO:0017076~purine nucleotide binding	25	10.5932	0.715339	ENSG00000008853, ENSG00000182185, ENSG00000066468, ENSG00000133056, ENSG00000138696, ENSG00000105851, ENSG00000140829, ENSG00000184209, ENSG00000184743, ENSG00000163785, ENSG00000196586, ENSG00000166377, ENSG00000155085, ENSG00000041515, ENSG00000047936, ENSG00000004846, ENSG00000101246, ENSG00000124217, ENSG00000005882, ENSG00000139832, ENSG00000054793, ENSG00000132394, ENSG00000127914, ENSG0000…	164	1813	11269	0.94751	1	0.99223	100
SMART	SM00015:IQ	2	0.847458	0.715486	ENSG00000041515, ENSG00000196586	127	80	8122	1.59882	1	0.993447	99.9999
GOTERM_BP_FAT	GO:0006259~DNA metabolic process	7	2.9661	0.716578	ENSG00000101868, ENSG00000182185, ENSG00000136997, ENSG00000160049, ENSG00000147862, ENSG00000136982, ENSG00000167085	176	476	11767	0.983205	1	0.995995	100
SP_PIR_KEYWORDS	Endocytosis	2	0.847458	0.719563	ENSG00000196586, ENSG00000166747	223	93	16396	1.58118	1	0.968514	100
GOTERM_MF_FAT	GO:0030674~protein binding, bridging	2	0.847458	0.719868	ENSG00000005020, ENSG00000106069	164	87	11269	1.57962	1	0.992321	100
GOTERM_BP_FAT	GO:0031344~regulation of cell projection organization	2	0.847458	0.721469	ENSG00000064300, ENSG00000179242	176	85	11767	1.57313	1	0.996219	100
GOTERM_BP_FAT	GO:0006576~biogenic amine metabolic process	2	0.847458	0.721469	ENSG00000115758, ENSG00000102230	176	85	11767	1.57313	1	0.996219	100
KEGG_PATHWAY	hsa04660:T cell receptor signaling pathway	2	0.847458	0.721656	ENSG00000105851, ENSG00000101096	58	97	4400	1.56417	1	0.910103	99.9999
SP_PIR_KEYWORDS	lipid synthesis	2	0.847458	0.723382	ENSG00000197977, ENSG00000164181	223	94	16396	1.56435	1	0.968599	100
GOTERM_BP_FAT	GO:0030335~positive regulation of cell migration	2	0.847458	0.725641	ENSG00000105879, ENSG00000185950	176	86	11767	1.55484	1	0.996392	100
GOTERM_BP_FAT	GO:0051259~protein oligomerization	3	1.27119	0.725993	ENSG00000142655, ENSG00000047932, ENSG00000184743	176	171	11767	1.17295	1	0.996344	100
GOTERM_MF_FAT	GO:0001882~nucleoside binding	21	8.89831	0.726217	ENSG00000182185, ENSG00000005882, ENSG00000066468, ENSG00000133056, ENSG00000138696, ENSG00000054793, ENSG00000105851, ENSG00000140829, ENSG00000184209, ENSG00000196586, ENSG00000163785, ENSG00000166377, ENSG00000101868, ENSG00000155085, ENSG00000041515, ENSG00000127914, ENSG00000047936, ENSG00000001626, ENSG00000168906, ENSG00000004846, ENSG00000124217, ENSG00000164715	164	1534	11269	0.940666	1	0.992605	100
UP_SEQ_FEATURE	binding site:ATP	7	2.9661	0.726382	ENSG00000005882, ENSG00000066468, ENSG00000138696, ENSG00000047936, ENSG00000168906, ENSG00000163785, ENSG00000164715	223	529	16383	0.972145	1	0.999988	100
GOTERM_MF_FAT	GO:0017124~SH3 domain binding	2	0.847458	0.727976	ENSG00000128512, ENSG00000122574	164	89	11269	1.54412	1	0.992418	100
GOTERM_CC_FAT	GO:0000151~ubiquitin ligase complex	2	0.847458	0.72845	ENSG00000105879, ENSG00000072803	160	89	10979	1.54199	1	0.973342	100
GOTERM_MF_FAT	GO:0015294~solute:cation symporter activity	2	0.847458	0.731942	ENSG00000123643, ENSG00000112337	164	90	11269	1.52696	1	0.992465	100
GOTERM_MF_FAT	GO:0017016~Ras GTPase binding	2	0.847458	0.731942	ENSG00000115648, ENSG00000128512	164	90	11269	1.52696	1	0.992465	100
GOTERM_MF_FAT	GO:0000166~nucleotide binding	29	12.2881	0.73262	ENSG00000008853, ENSG00000182185, ENSG00000066468, ENSG00000133056, ENSG00000138696, ENSG00000105851, ENSG00000140829, ENSG00000173821, ENSG00000184209, ENSG00000184743, ENSG00000163785, ENSG00000196586, ENSG00000166377, ENSG00000101868, ENSG00000155085, ENSG00000041515, ENSG00000047936, ENSG00000004846, ENSG00000124217, ENSG00000101246, ENSG00000005882, ENSG00000139832, ENSG00000054793, ENSG0000…	164	2118	11269	0.940835	1	0.992168	100
GOTERM_CC_FAT	GO:0000139~Golgi membrane	3	1.27119	0.733064	ENSG00000167080, ENSG00000118640, ENSG00000166747	160	178	10979	1.1565	1	0.973433	100
GOTERM_MF_FAT	GO:0005525~GTP binding	5	2.11864	0.733751	ENSG00000008853, ENSG00000132394, ENSG00000139832, ENSG00000184743, ENSG00000101246	164	342	11269	1.00458	1	0.991916	100
KEGG_PATHWAY	hsa04060:Cytokine-cytokine receptor interaction	3	1.27119	0.734847	ENSG00000064300, ENSG00000138696, ENSG00000120889	58	198	4400	1.14943	1	0.913162	99.9999
GOTERM_MF_FAT	GO:0043169~cation binding	53	22.4576	0.735599	ENSG00000181523, ENSG00000105879, ENSG00000138696, ENSG00000168769, ENSG00000165406, ENSG00000115756, ENSG00000163746, ENSG00000101868, ENSG00000166377, ENSG00000177311, ENSG00000137166, ENSG00000106052, ENSG00000172819, ENSG00000179242, ENSG00000164651, ENSG00000115648, ENSG00000140836, ENSG00000106069, ENSG00000198625, ENSG00000100505, ENSG00000168906, ENSG00000091409, ENSG00000068654, ENSG0000…	164	3824	11269	0.952356	1	0.991743	100
INTERPRO	IPR001254:Peptidase S1 and S6, chymotrypsin/Hap	2	0.847458	0.735746	ENSG00000167751, ENSG00000142515	208	92	14459	1.51118	1	0.999608	100
GOTERM_BP_FAT	GO:0009165~nucleotide biosynthetic process	3	1.27119	0.737733	ENSG00000166377, ENSG00000054793, ENSG00000102967	176	175	11767	1.14614	1	0.996917	100
INTERPRO	IPR000742:EGF-like, type 3	3	1.27119	0.740615	ENSG00000145934, ENSG00000189056, ENSG00000168743	208	183	14459	1.13958	1	0.999611	100
INTERPRO	IPR012335:Thioredoxin fold	2	0.847458	0.743306	ENSG00000140830, ENSG00000167693	208	94	14459	1.47903	1	0.999595	100
GOTERM_BP_FAT	GO:0009206~purine ribonucleoside triphosphate biosynthetic process	2	0.847458	0.74559	ENSG00000166377, ENSG00000054793	176	91	11767	1.46941	1	0.997243	100
GOTERM_BP_FAT	GO:0002009~morphogenesis of an epithelium	2	0.847458	0.74559	ENSG00000101752, ENSG00000005073	176	91	11767	1.46941	1	0.997243	100
GOTERM_BP_FAT	GO:0030855~epithelial cell differentiation	2	0.847458	0.74559	ENSG00000170477, ENSG00000172867	176	91	11767	1.46941	1	0.997243	100
GOTERM_MF_FAT	GO:0008135~translation factor activity, nucleic acid binding	2	0.847458	0.74724	ENSG00000132394, ENSG00000177369	164	94	11269	1.46199	1	0.992641	100
GOTERM_CC_FAT	GO:0044421~extracellular region part	11	4.66102	0.747657	ENSG00000101670, ENSG00000042832, ENSG00000167642, ENSG00000189056, ENSG00000096088, ENSG00000101126, ENSG00000187498, ENSG00000112706, ENSG00000070193, ENSG00000168743, ENSG00000108821	160	812	10979	0.929564	1	0.976186	100
GOTERM_MF_FAT	GO:0046983~protein dimerization activity	7	2.9661	0.747992	ENSG00000101868, ENSG00000146592, ENSG00000005882, ENSG00000137166, ENSG00000108753, ENSG00000100505, ENSG00000171206	164	507	11269	0.948706	1	0.992373	100
GOTERM_BP_FAT	GO:0009145~purine nucleoside triphosphate biosynthetic process	2	0.847458	0.749403	ENSG00000166377, ENSG00000054793	176	92	11767	1.45343	1	0.997365	100
GOTERM_BP_FAT	GO:0009201~ribonucleoside triphosphate biosynthetic process	2	0.847458	0.749403	ENSG00000166377, ENSG00000054793	176	92	11767	1.45343	1	0.997365	100
GOTERM_BP_FAT	GO:0031589~cell-substrate adhesion	2	0.847458	0.749403	ENSG00000091409, ENSG00000137809	176	92	11767	1.45343	1	0.997365	100
GOTERM_CC_FAT	GO:0034702~ion channel complex	3	1.27119	0.74971	ENSG00000120903, ENSG00000001626, ENSG00000026559	160	184	10979	1.11878	1	0.975655	100
GOTERM_BP_FAT	GO:0051270~regulation of cell motion	3	1.27119	0.751806	ENSG00000105879, ENSG00000185950, ENSG00000108798	176	180	11767	1.1143	1	0.997421	100
GOTERM_MF_FAT	GO:0032561~guanyl ribonucleotide binding	5	2.11864	0.75213	ENSG00000008853, ENSG00000132394, ENSG00000139832, ENSG00000184743, ENSG00000101246	164	351	11269	0.978824	1	0.992467	100
GOTERM_MF_FAT	GO:0019001~guanyl nucleotide binding	5	2.11864	0.75213	ENSG00000008853, ENSG00000132394, ENSG00000139832, ENSG00000184743, ENSG00000101246	164	351	11269	0.978824	1	0.992467	100
SP_PIR_KEYWORDS	ionic channel	4	1.69492	0.753457	ENSG00000187008, ENSG00000120903, ENSG00000001626, ENSG00000026559	223	289	16396	1.01764	1	0.976101	100
INTERPRO	IPR006210:EGF-like	3	1.27119	0.756625	ENSG00000145934, ENSG00000189056, ENSG00000168743	208	189	14459	1.1034	1	0.999669	100
GOTERM_BP_FAT	GO:0051272~positive regulation of cell motion	2	0.847458	0.756859	ENSG00000105879, ENSG00000185950	176	94	11767	1.42251	1	0.997591	100
GOTERM_BP_FAT	GO:0042445~hormone metabolic process	2	0.847458	0.756859	ENSG00000042832, ENSG00000189056	176	94	11767	1.42251	1	0.997591	100
OMIM_DISEASE	Many sequence variants affecting diversity of adult human height	3	1.27119	0.756881	ENSG00000177311, ENSG00000186047, ENSG00000185250	57	133	2787	1.10289	1	1	100
GOTERM_BP_FAT	GO:0034404~nucleobase, nucleoside and nucleotide biosynthetic process	3	1.27119	0.757252	ENSG00000166377, ENSG00000054793, ENSG00000102967	176	182	11767	1.10205	1	0.99756	100
GOTERM_BP_FAT	GO:0034654~nucleobase, nucleoside, nucleotide and nucleic acid biosynthetic process	3	1.27119	0.757252	ENSG00000166377, ENSG00000054793, ENSG00000102967	176	182	11767	1.10205	1	0.99756	100
GOTERM_BP_FAT	GO:0051603~proteolysis involved in cellular protein catabolic process	8	3.38983	0.757963	ENSG00000064300, ENSG00000105879, ENSG00000101752, ENSG00000168883, ENSG00000121067, ENSG00000072803, ENSG00000165406, ENSG00000107669	176	575	11767	0.930198	1	0.997542	100
UP_SEQ_FEATURE	domain:Ig-like C2-type 3	2	0.847458	0.759109	ENSG00000066468, ENSG00000170866	223	104	16383	1.41281	1	0.999995	100
GOTERM_CC_FAT	GO:0016023~cytoplasmic membrane-bounded vesicle	7	2.9661	0.759216	ENSG00000133056, ENSG00000197081, ENSG00000170743, ENSG00000001626, ENSG00000047932, ENSG00000196586, ENSG00000166747	160	513	10979	0.936318	1	0.97706	100
GOTERM_BP_FAT	GO:0019318~hexose metabolic process	3	1.27119	0.759936	ENSG00000005882, ENSG00000136997, ENSG00000185950	176	183	11767	1.09603	1	0.997579	100
GOTERM_BP_FAT	GO:0009142~nucleoside triphosphate biosynthetic process	2	0.847458	0.760504	ENSG00000166377, ENSG00000054793	176	95	11767	1.40754	1	0.997555	100
GOTERM_BP_FAT	GO:0021700~developmental maturation	2	0.847458	0.760504	ENSG00000006607, ENSG00000118689	176	95	11767	1.40754	1	0.997555	100
GOTERM_BP_FAT	GO:0044257~cellular protein catabolic process	8	3.38983	0.762684	ENSG00000064300, ENSG00000105879, ENSG00000101752, ENSG00000168883, ENSG00000121067, ENSG00000072803, ENSG00000165406, ENSG00000107669	176	578	11767	0.92537	1	0.997601	100
GOTERM_BP_FAT	GO:0032318~regulation of Ras GTPase activity	2	0.847458	0.764095	ENSG00000153317, ENSG00000011454	176	96	11767	1.39287	1	0.997614	100
GOTERM_BP_FAT	GO:0007050~cell cycle arrest	2	0.847458	0.764095	ENSG00000136997, ENSG00000080546	176	96	11767	1.39287	1	0.997614	100
SMART	SM00020:Tryp_SPc	2	0.847458	0.764632	ENSG00000167751, ENSG00000142515	127	92	8122	1.39028	1	0.996301	100
SP_PIR_KEYWORDS	Symport	2	0.847458	0.765362	ENSG00000123643, ENSG00000112337	223	106	16396	1.38726	1	0.978255	100
INTERPRO	IPR017441:Protein kinase, ATP binding site	6	2.54237	0.767856	ENSG00000066468, ENSG00000138696, ENSG00000127914, ENSG00000047936, ENSG00000163785, ENSG00000164715	208	445	14459	0.937273	1	0.999719	100
GOTERM_MF_FAT	GO:0015631~tubulin binding	2	0.847458	0.768574	ENSG00000115648, ENSG00000011454	164	100	11269	1.37427	1	0.99379	100
GOTERM_MF_FAT	GO:0031267~small GTPase binding	2	0.847458	0.768574	ENSG00000115648, ENSG00000128512	164	100	11269	1.37427	1	0.99379	100
UP_SEQ_FEATURE	domain:PDZ	2	0.847458	0.768831	ENSG00000163110, ENSG00000047932	223	107	16383	1.3732	1	0.999996	100
KEGG_PATHWAY	hsa04514:Cell adhesion molecules (CAMs)	2	0.847458	0.769124	ENSG00000179242, ENSG00000091409	58	111	4400	1.36688	1	0.928537	100
GOTERM_MF_FAT	GO:0030554~adenyl nucleotide binding	20	8.47458	0.7693	ENSG00000182185, ENSG00000005882, ENSG00000066468, ENSG00000133056, ENSG00000138696, ENSG00000054793, ENSG00000105851, ENSG00000140829, ENSG00000184209, ENSG00000163785, ENSG00000196586, ENSG00000166377, ENSG00000155085, ENSG00000041515, ENSG00000127914, ENSG00000047936, ENSG00000001626, ENSG00000168906, ENSG00000004846, ENSG00000124217, ENSG00000164715	164	1502	11269	0.914959	1	0.993563	100
GOTERM_CC_FAT	GO:0048471~perinuclear region of cytoplasm	4	1.69492	0.769444	ENSG00000042832, ENSG00000041515, ENSG00000196586, ENSG00000166747	160	277	10979	0.990884	1	0.978619	100
GOTERM_BP_FAT	GO:0051090~regulation of transcription factor activity	2	0.847458	0.771117	ENSG00000142655, ENSG00000068024	176	98	11767	1.36445	1	0.997855	100
GOTERM_BP_FAT	GO:0046034~ATP metabolic process	2	0.847458	0.77455	ENSG00000166377, ENSG00000054793	176	99	11767	1.35067	1	0.997946	100
GOTERM_BP_FAT	GO:0032844~regulation of homeostatic process	2	0.847458	0.77455	ENSG00000136997, ENSG00000118689	176	99	11767	1.35067	1	0.997946	100
UP_SEQ_FEATURE	calcium-binding region:2	2	0.847458	0.775094	ENSG00000115840, ENSG00000115756	223	109	16383	1.34801	1	0.999997	100
GOTERM_CC_FAT	GO:0005764~lysosome	3	1.27119	0.775482	ENSG00000181523, ENSG00000123643, ENSG00000197081	160	194	10979	1.06111	1	0.979148	100
GOTERM_CC_FAT	GO:0000323~lytic vacuole	3	1.27119	0.775482	ENSG00000181523, ENSG00000123643, ENSG00000197081	160	194	10979	1.06111	1	0.979148	100
GOTERM_MF_FAT	GO:0005198~structural molecule activity	7	2.9661	0.777196	ENSG00000185640, ENSG00000170477, ENSG00000187498, ENSG00000112706, ENSG00000172867, ENSG00000108821, ENSG00000170421	164	525	11269	0.916179	1	0.994016	100
UP_SEQ_FEATURE	zinc finger region:C2H2-type 3	7	2.9661	0.777608	ENSG00000177311, ENSG00000198740, ENSG00000101493, ENSG00000020256, ENSG00000101126, ENSG00000164651, ENSG00000140836	223	562	16383	0.915062	1	0.999997	100
GOTERM_CC_FAT	GO:0005783~endoplasmic reticulum	12	5.08475	0.778991	ENSG00000042832, ENSG00000133056, ENSG00000102230, ENSG00000197977, ENSG00000181045, ENSG00000123643, ENSG00000115486, ENSG00000000419, ENSG00000001626, ENSG00000121073, ENSG00000184743, ENSG00000164181	160	912	10979	0.902878	1	0.979083	100
GOTERM_BP_FAT	GO:0046903~secretion	4	1.69492	0.780393	ENSG00000091138, ENSG00000108753, ENSG00000196586, ENSG00000112499	176	275	11767	0.972479	1	0.998121	100
GOTERM_BP_FAT	GO:0009100~glycoprotein metabolic process	3	1.27119	0.780504	ENSG00000181523, ENSG00000000419, ENSG00000167080	176	191	11767	1.05012	1	0.998087	100
INTERPRO	IPR015943:WD40/YVTN repeat-like	4	1.69492	0.782427	ENSG00000076356, ENSG00000072803, ENSG00000120008, ENSG00000115761	208	287	14459	0.968842	1	0.999783	100
GOTERM_BP_FAT	GO:0008361~regulation of cell size	3	1.27119	0.782964	ENSG00000066468, ENSG00000179242, ENSG00000172819	176	192	11767	1.04466	1	0.998137	100
UP_SEQ_FEATURE	mutagenesis site	24	10.1695	0.783104	ENSG00000173612, ENSG00000142655, ENSG00000115758, ENSG00000203896, ENSG00000123643, ENSG00000177369, ENSG00000068024, ENSG00000183955, ENSG00000184743, ENSG00000115648, ENSG00000175003, ENSG00000170421, ENSG00000159217, ENSG00000125520, ENSG00000198625, ENSG00000196917, ENSG00000110092, ENSG00000118689, ENSG00000203805, ENSG00000047932, ENSG00000136848, ENSG00000124217, ENSG00000137809, ENSG0000…	223	1940	16383	0.908862	1	0.999997	100
GOTERM_BP_FAT	GO:0032268~regulation of cellular protein metabolic process	6	2.54237	0.783583	ENSG00000132394, ENSG00000159217, ENSG00000177369, ENSG00000158615, ENSG00000110092, ENSG00000068024	176	437	11767	0.917958	1	0.998121	100
GOTERM_BP_FAT	GO:0006812~cation transport	7	2.9661	0.783706	ENSG00000146477, ENSG00000123643, ENSG00000112337, ENSG00000147454, ENSG00000026559, ENSG00000112499, ENSG00000175003	176	515	11767	0.908749	1	0.998088	100
GOTERM_CC_FAT	GO:0031988~membrane-bounded vesicle	7	2.9661	0.784488	ENSG00000133056, ENSG00000197081, ENSG00000170743, ENSG00000001626, ENSG00000047932, ENSG00000196586, ENSG00000166747	160	529	10979	0.907999	1	0.979514	100
GOTERM_BP_FAT	GO:0007268~synaptic transmission	4	1.69492	0.784544	ENSG00000146477, ENSG00000170579, ENSG00000127914, ENSG00000196586	176	277	11767	0.965458	1	0.998081	100
SP_PIR_KEYWORDS	DNA binding	4	1.69492	0.785003	ENSG00000101868, ENSG00000108753, ENSG00000005073, ENSG00000140836	223	305	16396	0.964258	1	0.98205	100
SP_PIR_KEYWORDS	P-loop	2	0.847458	0.786855	ENSG00000168906, ENSG00000196586	223	113	16396	1.30132	1	0.981763	100
SP_PIR_KEYWORDS	egf-like domain	3	1.27119	0.786883	ENSG00000145934, ENSG00000189056, ENSG00000168743	223	213	16396	1.03556	1	0.981067	100
GOTERM_CC_FAT	GO:0005635~nuclear envelope	3	1.27119	0.787484	ENSG00000101868, ENSG00000197081, ENSG00000196586	160	199	10979	1.03445	1	0.979356	100
GOTERM_BP_FAT	GO:0007517~muscle organ development	3	1.27119	0.787812	ENSG00000168899, ENSG00000111913, ENSG00000137809	176	194	11767	1.03389	1	0.998161	100
GOTERM_BP_FAT	GO:0006886~intracellular protein transport	5	2.11864	0.789527	ENSG00000142655, ENSG00000196586, ENSG00000070193, ENSG00000166747, ENSG00000115648	176	361	11767	0.92601	1	0.998185	100
GOTERM_BP_FAT	GO:0030163~protein catabolic process	8	3.38983	0.789624	ENSG00000064300, ENSG00000105879, ENSG00000101752, ENSG00000168883, ENSG00000121067, ENSG00000072803, ENSG00000165406, ENSG00000107669	176	596	11767	0.897422	1	0.998152	100
GOTERM_BP_FAT	GO:0009057~macromolecule catabolic process	10	4.23729	0.789641	ENSG00000064300, ENSG00000136997, ENSG00000105879, ENSG00000101752, ENSG00000160049, ENSG00000168883, ENSG00000121067, ENSG00000072803, ENSG00000165406, ENSG00000107669	176	748	11767	0.893823	1	0.998116	100
GOTERM_MF_FAT	GO:0001883~purine nucleoside binding	20	8.47458	0.789711	ENSG00000182185, ENSG00000005882, ENSG00000066468, ENSG00000133056, ENSG00000138696, ENSG00000054793, ENSG00000105851, ENSG00000140829, ENSG00000184209, ENSG00000163785, ENSG00000196586, ENSG00000166377, ENSG00000155085, ENSG00000041515, ENSG00000127914, ENSG00000047936, ENSG00000001626, ENSG00000168906, ENSG00000004846, ENSG00000124217, ENSG00000164715	164	1523	11269	0.902343	1	0.994845	100
SP_PIR_KEYWORDS	ubl conjugation pathway	6	2.54237	0.78979	ENSG00000105879, ENSG00000101752, ENSG00000121067, ENSG00000072803, ENSG00000165406, ENSG00000107669	223	485	16396	0.909583	1	0.981027	100
SP_PIR_KEYWORDS	lipoprotein	7	2.9661	0.793738	ENSG00000163746, ENSG00000091844, ENSG00000203896, ENSG00000139832, ENSG00000167083, ENSG00000150672, ENSG00000115756	223	574	16396	0.896642	1	0.981235	100
GOTERM_MF_FAT	GO:0051020~GTPase binding	2	0.847458	0.79426	ENSG00000115648, ENSG00000128512	164	108	11269	1.27247	1	0.994978	100
UP_SEQ_FEATURE	repeat:ANK 1	3	1.27119	0.795834	ENSG00000101752, ENSG00000041515, ENSG00000153317	223	217	16383	1.01566	1	0.999998	100
SMART	SM00181:EGF	3	1.27119	0.796345	ENSG00000145934, ENSG00000189056, ENSG00000168743	127	189	8122	1.01512	1	0.997439	100
UP_SEQ_FEATURE	repeat:ANK 2	3	1.27119	0.797931	ENSG00000101752, ENSG00000041515, ENSG00000153317	223	218	16383	1.01101	1	0.999998	100
SP_PIR_KEYWORDS	potassium	2	0.847458	0.798244	ENSG00000168906, ENSG00000026559	223	117	16396	1.25683	1	0.981582	100
INTERPRO	IPR000719:Protein kinase, core	6	2.54237	0.798403	ENSG00000066468, ENSG00000138696, ENSG00000127914, ENSG00000047936, ENSG00000163785, ENSG00000164715	208	464	14459	0.898893	1	0.999841	100
GOTERM_BP_FAT	GO:0051301~cell division	4	1.69492	0.79857	ENSG00000111859, ENSG00000110092, ENSG00000183955, ENSG00000164649	176	284	11767	0.941661	1	0.998386	100
GOTERM_BP_FAT	GO:0009152~purine ribonucleotide biosynthetic process	2	0.847458	0.803228	ENSG00000166377, ENSG00000054793	176	108	11767	1.23811	1	0.998501	100
KEGG_PATHWAY	hsa03040:Spliceosome	2	0.847458	0.803409	ENSG00000168883, ENSG00000140829	58	123	4400	1.23353	1	0.942976	100
UP_SEQ_FEATURE	calcium-binding region:1	2	0.847458	0.803966	ENSG00000115840, ENSG00000115756	223	119	16383	1.23473	1	0.999998	100
GOTERM_BP_FAT	GO:0007267~cell-cell signaling	7	2.9661	0.804675	ENSG00000146477, ENSG00000170579, ENSG00000108753, ENSG00000127914, ENSG00000196586, ENSG00000070193, ENSG00000005073	176	529	11767	0.884699	1	0.998515	100
UP_SEQ_FEATURE	zinc finger region:C2H2-type 7	5	2.11864	0.805474	ENSG00000177311, ENSG00000198740, ENSG00000101493, ENSG00000020256, ENSG00000101126	223	407	16383	0.902535	1	0.999998	100
UP_SEQ_FEATURE	repeat:WD 5	3	1.27119	0.80613	ENSG00000072803, ENSG00000120008, ENSG00000115761	223	222	16383	0.992789	1	0.999998	100
GOTERM_BP_FAT	GO:0045860~positive regulation of protein kinase activity	3	1.27119	0.806268	ENSG00000189056, ENSG00000110092, ENSG00000120889	176	202	11767	0.99294	1	0.998533	100
GOTERM_CC_FAT	GO:0005768~endosome	4	1.69492	0.806995	ENSG00000064300, ENSG00000197081, ENSG00000141252, ENSG00000118640	160	296	10979	0.92728	1	0.983039	100
SP_PIR_KEYWORDS	ank repeat	3	1.27119	0.807779	ENSG00000101752, ENSG00000041515, ENSG00000153317	223	223	16396	0.989121	1	0.983055	100
GOTERM_MF_FAT	GO:0022834~ligand-gated channel activity	2	0.847458	0.808854	ENSG00000120903, ENSG00000001626	164	113	11269	1.21617	1	0.995878	100
GOTERM_MF_FAT	GO:0015276~ligand-gated ion channel activity	2	0.847458	0.808854	ENSG00000120903, ENSG00000001626	164	113	11269	1.21617	1	0.995878	100
GOTERM_BP_FAT	GO:0009205~purine ribonucleoside triphosphate metabolic process	2	0.847458	0.809091	ENSG00000166377, ENSG00000054793	176	110	11767	1.2156	1	0.998588	100
GOTERM_CC_FAT	GO:0044420~extracellular matrix part	2	0.847458	0.809286	ENSG00000187498, ENSG00000108821	160	113	10979	1.21449	1	0.98279	100
KEGG_PATHWAY	hsa04360:Axon guidance	2	0.847458	0.811166	ENSG00000076356, ENSG00000101096	58	126	4400	1.20416	1	0.943455	100
UP_SEQ_FEATURE	repeat:ANK 5	2	0.847458	0.811885	ENSG00000101752, ENSG00000041515	223	122	16383	1.20437	1	0.999998	100
GOTERM_BP_FAT	GO:0009199~ribonucleoside triphosphate metabolic process	2	0.847458	0.811957	ENSG00000166377, ENSG00000054793	176	111	11767	1.20465	1	0.998643	100
GOTERM_BP_FAT	GO:0001654~eye development	2	0.847458	0.81478	ENSG00000138696, ENSG00000172819	176	112	11767	1.19389	1	0.998696	100
GOTERM_BP_FAT	GO:0019932~second-messenger-mediated signaling	3	1.27119	0.814953	ENSG00000173612, ENSG00000133056, ENSG00000105851	176	206	11767	0.97366	1	0.998674	100
INTERPRO	IPR013783:Immunoglobulin-like fold	5	2.11864	0.816532	ENSG00000066468, ENSG00000163492, ENSG00000101096, ENSG00000170866, ENSG00000007129	208	392	14459	0.886664	1	0.999894	100
GOTERM_BP_FAT	GO:0010324~membrane invagination	3	1.27119	0.819164	ENSG00000197081, ENSG00000196586, ENSG00000166747	176	208	11767	0.964297	1	0.998764	100
GOTERM_BP_FAT	GO:0006897~endocytosis	3	1.27119	0.819164	ENSG00000197081, ENSG00000196586, ENSG00000166747	176	208	11767	0.964297	1	0.998764	100
SP_PIR_KEYWORDS	cleavage on pair of basic residues	3	1.27119	0.819427	ENSG00000176358, ENSG00000179242, ENSG00000091409	223	229	16396	0.963205	1	0.984918	100
GOTERM_CC_FAT	GO:0031090~organelle membrane	13	5.50847	0.819552	ENSG00000142655, ENSG00000115840, ENSG00000147454, ENSG00000114120, ENSG00000000419, ENSG00000001626, ENSG00000167085, ENSG00000102967, ENSG00000167080, ENSG00000196586, ENSG00000177370, ENSG00000118640, ENSG00000166747	160	1025	10979	0.870287	1	0.984287	100
INTERPRO	IPR013753:Ras	2	0.847458	0.821479	ENSG00000008853, ENSG00000139832	208	119	14459	1.16831	1	0.999898	100
SP_PIR_KEYWORDS	motor protein	2	0.847458	0.821704	ENSG00000041515, ENSG00000196586	223	126	16396	1.16706	1	0.984817	100
SP_PIR_KEYWORDS	hydrolase	17	7.20339	0.822356	ENSG00000101670, ENSG00000186094, ENSG00000181523, ENSG00000054793, ENSG00000140829, ENSG00000068024, ENSG00000184743, ENSG00000166377, ENSG00000167751, ENSG00000189056, ENSG00000040199, ENSG00000100523, ENSG00000096088, ENSG00000001626, ENSG00000142515, ENSG00000203805, ENSG00000163874	223	1431	16396	0.873459	1	0.984383	100
GOTERM_BP_FAT	GO:0009144~purine nucleoside triphosphate metabolic process	2	0.847458	0.822999	ENSG00000166377, ENSG00000054793	176	115	11767	1.16275	1	0.99884	100
GOTERM_BP_FAT	GO:0033674~positive regulation of kinase activity	3	1.27119	0.82329	ENSG00000189056, ENSG00000110092, ENSG00000120889	176	210	11767	0.955114	1	0.998824	100
UP_SEQ_FEATURE	nucleotide phosphate-binding region:ATP	11	4.66102	0.824828	ENSG00000182185, ENSG00000005882, ENSG00000066468, ENSG00000138696, ENSG00000047936, ENSG00000140829, ENSG00000168906, ENSG00000184209, ENSG00000004846, ENSG00000163785, ENSG00000196586, ENSG00000164715	223	939	16383	0.860628	1	0.999999	100
GOTERM_BP_FAT	GO:0051101~regulation of DNA binding	2	0.847458	0.825658	ENSG00000142655, ENSG00000068024	176	116	11767	1.15272	1	0.998861	100
SP_PIR_KEYWORDS	actin-binding	3	1.27119	0.828649	ENSG00000041515, ENSG00000196586, ENSG00000122574	223	234	16396	0.942624	1	0.985138	100
GOTERM_CC_FAT	GO:0044463~cell projection part	3	1.27119	0.830041	ENSG00000091138, ENSG00000175764, ENSG00000196586	160	219	10979	0.939983	1	0.985782	100
GOTERM_CC_FAT	GO:0005813~centrosome	3	1.27119	0.830041	ENSG00000127914, ENSG00000138162, ENSG00000011454	160	219	10979	0.939983	1	0.985782	100
INTERPRO	IPR002110:Ankyrin	3	1.27119	0.830223	ENSG00000101752, ENSG00000041515, ENSG00000153317	208	222	14459	0.939384	1	0.999913	100
KEGG_PATHWAY	hsa04120:Ubiquitin mediated proteolysis	2	0.847458	0.830412	ENSG00000008853, ENSG00000072803	58	134	4400	1.13227	1	0.949927	100
GOTERM_BP_FAT	GO:0006486~protein amino acid glycosylation	2	0.847458	0.830856	ENSG00000000419, ENSG00000167080	176	118	11767	1.13319	1	0.998966	100
GOTERM_BP_FAT	GO:0043413~biopolymer glycosylation	2	0.847458	0.830856	ENSG00000000419, ENSG00000167080	176	118	11767	1.13319	1	0.998966	100
GOTERM_BP_FAT	GO:0070085~glycosylation	2	0.847458	0.830856	ENSG00000000419, ENSG00000167080	176	118	11767	1.13319	1	0.998966	100
UP_SEQ_FEATURE	domain:BTB	2	0.847458	0.831479	ENSG00000177311, ENSG00000121067	223	130	16383	1.13025	1	0.999999	100
GOTERM_BP_FAT	GO:0043632~modification-dependent macromolecule catabolic process	7	2.9661	0.833152	ENSG00000105879, ENSG00000101752, ENSG00000168883, ENSG00000121067, ENSG00000072803, ENSG00000165406, ENSG00000107669	176	550	11767	0.850919	1	0.998999	100
GOTERM_BP_FAT	GO:0019941~modification-dependent protein catabolic process	7	2.9661	0.833152	ENSG00000105879, ENSG00000101752, ENSG00000168883, ENSG00000121067, ENSG00000072803, ENSG00000165406, ENSG00000107669	176	550	11767	0.850919	1	0.998999	100
SP_PIR_KEYWORDS	methyltransferase	2	0.847458	0.835814	ENSG00000171861, ENSG00000183955	223	132	16396	1.11401	1	0.986065	100
GOTERM_BP_FAT	GO:0016570~histone modification	2	0.847458	0.8359	ENSG00000068024, ENSG00000167085	176	120	11767	1.1143	1	0.999042	100
UP_SEQ_FEATURE	compositionally biased region:Ala-rich	2	0.847458	0.836051	ENSG00000164651, ENSG00000183955	223	132	16383	1.11313	1	0.999999	100
GOTERM_BP_FAT	GO:0043009~chordate embryonic development	4	1.69492	0.836155	ENSG00000101752, ENSG00000167034, ENSG00000108753, ENSG00000108821	176	305	11767	0.876826	1	0.999027	100
UP_SEQ_FEATURE	zinc finger region:C2H2-type 4	6	2.54237	0.837404	ENSG00000177311, ENSG00000198740, ENSG00000101493, ENSG00000020256, ENSG00000101126, ENSG00000140836	223	520	16383	0.847689	1	0.999999	100
UP_SEQ_FEATURE	repeat:WD 4	3	1.27119	0.837773	ENSG00000072803, ENSG00000120008, ENSG00000115761	223	239	16383	0.922172	1	0.999999	100
GOTERM_BP_FAT	GO:0051347~positive regulation of transferase activity	3	1.27119	0.838965	ENSG00000189056, ENSG00000110092, ENSG00000120889	176	218	11767	0.920064	1	0.999071	100
GOTERM_MF_FAT	GO:0004252~serine-type endopeptidase activity	2	0.847458	0.839816	ENSG00000167751, ENSG00000142515	164	125	11269	1.09941	1	0.997581	100
GOTERM_BP_FAT	GO:0010038~response to metal ion	2	0.847458	0.840794	ENSG00000115840, ENSG00000110092	176	122	11767	1.09603	1	0.999092	100
GOTERM_BP_FAT	GO:0009792~embryonic development ending in birth or egg hatching	4	1.69492	0.841003	ENSG00000101752, ENSG00000167034, ENSG00000108753, ENSG00000108821	176	308	11767	0.868285	1	0.999078	100
SP_PIR_KEYWORDS	neurogenesis	2	0.847458	0.842446	ENSG00000168874, ENSG00000064300	223	135	16396	1.08925	1	0.986875	100
GOTERM_MF_FAT	GO:0004857~enzyme inhibitor activity	3	1.27119	0.842463	ENSG00000167642, ENSG00000167641, ENSG00000164715	164	226	11269	0.912125	1	0.997586	100
GOTERM_CC_FAT	GO:0016324~apical plasma membrane	2	0.847458	0.842562	ENSG00000091138, ENSG00000001626	160	126	10979	1.08919	1	0.987608	100
GOTERM_BP_FAT	GO:0009141~nucleoside triphosphate metabolic process	2	0.847458	0.843187	ENSG00000166377, ENSG00000054793	176	123	11767	1.08712	1	0.999107	100
GOTERM_BP_FAT	GO:0051051~negative regulation of transport	2	0.847458	0.843187	ENSG00000185950, ENSG00000047932	176	123	11767	1.08712	1	0.999107	100
INTERPRO	IPR013098:Immunoglobulin I-set	2	0.847458	0.843383	ENSG00000066468, ENSG00000163492	208	128	14459	1.08616	1	0.999936	100
GOTERM_BP_FAT	GO:0051240~positive regulation of multicellular organismal process	3	1.27119	0.844514	ENSG00000101670, ENSG00000176358, ENSG00000138696	176	221	11767	0.907574	1	0.999117	100
GOTERM_BP_FAT	GO:0016569~covalent chromatin modification	2	0.847458	0.845544	ENSG00000068024, ENSG00000167085	176	124	11767	1.07835	1	0.999121	100
GOTERM_BP_FAT	GO:0017038~protein import	2	0.847458	0.847865	ENSG00000142655, ENSG00000070193	176	125	11767	1.06973	1	0.999153	100
UP_SEQ_FEATURE	metal ion-binding site:Zinc	2	0.847458	0.84904	ENSG00000068654, ENSG00000186094	223	138	16383	1.06473	1	0.999999	100
GOTERM_BP_FAT	GO:0050878~regulation of body fluid levels	2	0.847458	0.850152	ENSG00000115486, ENSG00000112499	176	126	11767	1.06124	1	0.999183	100
GOTERM_BP_FAT	GO:0006508~proteolysis	12	5.08475	0.850307	ENSG00000064300, ENSG00000167751, ENSG00000105879, ENSG00000186094, ENSG00000101752, ENSG00000168883, ENSG00000121067, ENSG00000072803, ENSG00000165406, ENSG00000096088, ENSG00000107669, ENSG00000142515	176	955	11767	0.8401	1	0.999169	100
GOTERM_MF_FAT	GO:0008233~peptidase activity	6	2.54237	0.851464	ENSG00000167751, ENSG00000186094, ENSG00000167642, ENSG00000189056, ENSG00000096088, ENSG00000142515	164	497	11269	0.829538	1	0.997898	100
GOTERM_CC_FAT	GO:0030659~cytoplasmic vesicle membrane	2	0.847458	0.851588	ENSG00000001626, ENSG00000196586	160	130	10979	1.05567	1	0.988714	100
GOTERM_MF_FAT	GO:0005509~calcium ion binding	10	4.23729	0.852338	ENSG00000163746, ENSG00000181523, ENSG00000189056, ENSG00000115840, ENSG00000179242, ENSG00000170743, ENSG00000168743, ENSG00000115756, ENSG00000091409, ENSG00000137809	164	825	11269	0.83289	1	0.997825	100
SP_PIR_KEYWORDS	glycoprotein	42	17.7966	0.852909	ENSG00000064300, ENSG00000136997, ENSG00000066468, ENSG00000181523, ENSG00000197081, ENSG00000187008, ENSG00000187498, ENSG00000163785, ENSG00000112499, ENSG00000147655, ENSG00000076356, ENSG00000167751, ENSG00000145934, ENSG00000047936, ENSG00000196917, ENSG00000120903, ENSG00000137809, ENSG00000146477, ENSG00000101670, ENSG00000042832, ENSG00000173612, ENSG00000091844, ENSG00000179242, ENSG0000…	223	3458	16396	0.893012	1	0.98839	100
GOTERM_BP_FAT	GO:0051726~regulation of cell cycle	4	1.69492	0.853334	ENSG00000064300, ENSG00000136997, ENSG00000041515, ENSG00000110092	176	316	11767	0.846303	1	0.999214	100
GOTERM_MF_FAT	GO:0015293~symporter activity	2	0.847458	0.853372	ENSG00000123643, ENSG00000112337	164	131	11269	1.04906	1	0.99776	100
GOTERM_BP_FAT	GO:0032583~regulation of gene-specific transcription	2	0.847458	0.854624	ENSG00000142655, ENSG00000068024	176	128	11767	1.04466	1	0.999224	100
GOTERM_CC_FAT	GO:0005773~vacuole	3	1.27119	0.855124	ENSG00000181523, ENSG00000123643, ENSG00000197081	160	233	10979	0.883503	1	0.988831	100
UP_SEQ_FEATURE	compositionally biased region:Poly-Gln	2	0.847458	0.855146	ENSG00000136997, ENSG00000140836	223	141	16383	1.04208	1	0.999999	100
GOTERM_CC_FAT	GO:0012505~endomembrane system	9	3.81356	0.856721	ENSG00000101868, ENSG00000157538, ENSG00000197081, ENSG00000000419, ENSG00000001626, ENSG00000167080, ENSG00000196586, ENSG00000118640, ENSG00000166747	160	748	10979	0.825627	1	0.988606	100
GOTERM_BP_FAT	GO:0009150~purine ribonucleotide metabolic process	2	0.847458	0.85681	ENSG00000166377, ENSG00000054793	176	129	11767	1.03656	1	0.999251	100
GOTERM_CC_FAT	GO:0043005~neuron projection	4	1.69492	0.857226	ENSG00000102606, ENSG00000189056, ENSG00000047932, ENSG00000196586	160	327	10979	0.839373	1	0.98818	100
GOTERM_BP_FAT	GO:0030029~actin filament-based process	3	1.27119	0.858475	ENSG00000111859, ENSG00000196586, ENSG00000073712	176	229	11767	0.875868	1	0.999268	100
INTERPRO	IPR002048:Calcium-binding EF-hand	2	0.847458	0.858551	ENSG00000115840, ENSG00000115756	208	135	14459	1.02984	1	0.999958	100
SP_PIR_KEYWORDS	transmembrane protein	6	2.54237	0.858656	ENSG00000064300, ENSG00000066468, ENSG00000179242, ENSG00000047936, ENSG00000197081, ENSG00000091409	223	539	16396	0.818456	1	0.989002	100
UP_SEQ_FEATURE	repeat:WD 3	3	1.27119	0.858748	ENSG00000072803, ENSG00000120008, ENSG00000115761	223	252	16383	0.8746	1	0.999999	100
KEGG_PATHWAY	hsa00230:Purine metabolism	2	0.847458	0.859563	ENSG00000068654, ENSG00000101868	58	148	4400	1.02516	1	0.96103	100
GOTERM_BP_FAT	GO:0045859~regulation of protein kinase activity	4	1.69492	0.860614	ENSG00000189056, ENSG00000197114, ENSG00000110092, ENSG00000120889	176	321	11767	0.833121	1	0.999293	100
UP_SEQ_FEATURE	repeat:WD 7	2	0.847458	0.861005	ENSG00000072803, ENSG00000120008	223	144	16383	1.02037	1	0.999999	100
GOTERM_BP_FAT	GO:0007626~locomotory behavior	3	1.27119	0.861783	ENSG00000189056, ENSG00000196586, ENSG00000070193	176	231	11767	0.868285	1	0.999301	100
SP_PIR_KEYWORDS	zinc finger	2	0.847458	0.862686	ENSG00000101868, ENSG00000140836	223	145	16396	1.01413	1	0.989308	100
SP_PIR_KEYWORDS	Acyltransferase	2	0.847458	0.862686	ENSG00000107669, ENSG00000172197	223	145	16396	1.01413	1	0.989308	100
GOTERM_BP_FAT	GO:0007005~mitochondrion organization	2	0.847458	0.863173	ENSG00000136997, ENSG00000127989	176	132	11767	1.013	1	0.999312	100
GOTERM_MF_FAT	GO:0004518~nuclease activity	2	0.847458	0.863794	ENSG00000160049, ENSG00000163874	164	136	11269	1.01049	1	0.998131	100
GOTERM_MF_FAT	GO:0003774~motor activity	2	0.847458	0.863794	ENSG00000041515, ENSG00000196586	164	136	11269	1.01049	1	0.998131	100
GOTERM_MF_FAT	GO:0003682~chromatin binding	2	0.847458	0.863794	ENSG00000101868, ENSG00000101126	164	136	11269	1.01049	1	0.998131	100
SMART	SM00248:ANK	3	1.27119	0.863837	ENSG00000101752, ENSG00000041515, ENSG00000153317	127	222	8122	0.864226	1	0.99929	100
UP_SEQ_FEATURE	repeat:ANK 4	2	0.847458	0.864779	ENSG00000101752, ENSG00000041515	223	146	16383	1.00639	1	0.999999	100
GOTERM_BP_FAT	GO:0001525~angiogenesis	2	0.847458	0.867258	ENSG00000070193, ENSG00000163874	176	134	11767	0.99788	1	0.999371	100
SP_PIR_KEYWORDS	prenylation	2	0.847458	0.868238	ENSG00000139832, ENSG00000167083	223	148	16396	0.993577	1	0.989887	100
SP_PIR_KEYWORDS	manganese	2	0.847458	0.868238	ENSG00000138696, ENSG00000040199	223	148	16396	0.993577	1	0.989887	100
SP_PIR_KEYWORDS	iron	3	1.27119	0.8687	ENSG00000145996, ENSG00000168769, ENSG00000147454	223	259	16396	0.851637	1	0.989579	100
GOTERM_BP_FAT	GO:0007010~cytoskeleton organization	5	2.11864	0.868809	ENSG00000111859, ENSG00000170477, ENSG00000138162, ENSG00000170421, ENSG00000073712	176	414	11767	0.807463	1	0.999385	100
GOTERM_CC_FAT	GO:0044445~cytosolic part	2	0.847458	0.870061	ENSG00000133056, ENSG00000105851	160	139	10979	0.98732	1	0.990015	100
GOTERM_BP_FAT	GO:0019226~transmission of nerve impulse	4	1.69492	0.870275	ENSG00000146477, ENSG00000170579, ENSG00000127914, ENSG00000196586	176	328	11767	0.815341	1	0.999397	100
UP_SEQ_FEATURE	repeat:WD 1	3	1.27119	0.870398	ENSG00000072803, ENSG00000120008, ENSG00000115761	223	260	16383	0.847689	1	0.999999	100
UP_SEQ_FEATURE	repeat:WD 2	3	1.27119	0.870398	ENSG00000072803, ENSG00000120008, ENSG00000115761	223	260	16383	0.847689	1	0.999999	100
UP_SEQ_FEATURE	domain:Protein kinase	5	2.11864	0.87163	ENSG00000066468, ENSG00000138696, ENSG00000047936, ENSG00000163785, ENSG00000164715	223	458	16383	0.802035	1	0.999999	100
INTERPRO	IPR016040:NAD(P)-binding domain	2	0.847458	0.872257	ENSG00000124217, ENSG00000175029	208	142	14459	0.979076	1	0.999972	100
SP_PIR_KEYWORDS	wd repeat	3	1.27119	0.872883	ENSG00000072803, ENSG00000120008, ENSG00000115761	223	262	16396	0.841885	1	0.989935	100
GOTERM_BP_FAT	GO:0046942~carboxylic acid transport	2	0.847458	0.87316	ENSG00000115840, ENSG00000123643	176	137	11767	0.976029	1	0.999433	100
UP_SEQ_FEATURE	compositionally biased region:Poly-Glu	5	2.11864	0.874839	ENSG00000157423, ENSG00000197114, ENSG00000026559, ENSG00000115504, ENSG00000140836	223	461	16383	0.796815	1	0.999999	100
GOTERM_BP_FAT	GO:0015849~organic acid transport	2	0.847458	0.875068	ENSG00000115840, ENSG00000123643	176	138	11767	0.968956	1	0.999452	100
GOTERM_BP_FAT	GO:0006164~purine nucleotide biosynthetic process	2	0.847458	0.875068	ENSG00000166377, ENSG00000054793	176	138	11767	0.968956	1	0.999452	100
GOTERM_BP_FAT	GO:0043549~regulation of kinase activity	4	1.69492	0.875529	ENSG00000189056, ENSG00000197114, ENSG00000110092, ENSG00000120889	176	332	11767	0.805518	1	0.999448	100
GOTERM_CC_FAT	GO:0012506~vesicle membrane	2	0.847458	0.875696	ENSG00000001626, ENSG00000196586	160	142	10979	0.966461	1	0.99054	100
GOTERM_CC_FAT	GO:0005739~mitochondrion	12	5.08475	0.876089	ENSG00000005882, ENSG00000115840, ENSG00000147454, ENSG00000114120, ENSG00000111913, ENSG00000068615, ENSG00000167085, ENSG00000102967, ENSG00000127989, ENSG00000177370, ENSG00000167699, ENSG00000140836	160	1010	10979	0.815272	1	0.990171	100
UP_SEQ_FEATURE	domain:Ig-like C2-type 1	2	0.847458	0.877204	ENSG00000066468, ENSG00000170866	223	153	16383	0.960345	1	0.999999	100
GOTERM_CC_FAT	GO:0005819~spindle	2	0.847458	0.87752	ENSG00000136997, ENSG00000111859	160	143	10979	0.959703	1	0.989982	100
GOTERM_BP_FAT	GO:0051241~negative regulation of multicellular organismal process	2	0.847458	0.8788	ENSG00000064300, ENSG00000125398	176	140	11767	0.955114	1	0.999487	100
UP_SEQ_FEATURE	domain:Ig-like C2-type 2	2	0.847458	0.878884	ENSG00000066468, ENSG00000170866	223	154	16383	0.954109	1	0.999999	100
INTERPRO	IPR001680:WD40 repeat	3	1.27119	0.879115	ENSG00000072803, ENSG00000120008, ENSG00000115761	208	252	14459	0.827553	1	0.999976	100
SMART	SM00054:EFh	2	0.847458	0.880981	ENSG00000115840, ENSG00000115756	127	135	8122	0.947448	1	0.999454	100
GOTERM_BP_FAT	GO:0042325~regulation of phosphorylation	5	2.11864	0.886011	ENSG00000189056, ENSG00000167641, ENSG00000197114, ENSG00000110092, ENSG00000120889	176	429	11767	0.77923	1	0.99958	100
GOTERM_CC_FAT	GO:0015630~microtubule cytoskeleton	6	2.54237	0.886073	ENSG00000136997, ENSG00000111859, ENSG00000127914, ENSG00000138162, ENSG00000175764, ENSG00000011454	160	528	10979	0.779759	1	0.991056	100
UP_SEQ_FEATURE	zinc finger region:C2H2-type 8	4	1.69492	0.886548	ENSG00000177311, ENSG00000198740, ENSG00000101493, ENSG00000020256	223	375	16383	0.783641	1	1	100
GOTERM_BP_FAT	GO:0032535~regulation of cellular component size	3	1.27119	0.887177	ENSG00000066468, ENSG00000179242, ENSG00000172819	176	248	11767	0.808766	1	0.999586	100
SP_PIR_KEYWORDS	Immunoglobulin domain	4	1.69492	0.8873	ENSG00000066468, ENSG00000163492, ENSG00000170866, ENSG00000007129	223	376	16396	0.782177	1	0.991994	100
GOTERM_MF_FAT	GO:0005216~ion channel activity	4	1.69492	0.887334	ENSG00000187008, ENSG00000120903, ENSG00000001626, ENSG00000026559	164	351	11269	0.783059	1	0.998911	100
UP_SEQ_FEATURE	glycosylation site:N-linked (GlcNAc...)	39	16.5254	0.887581	ENSG00000064300, ENSG00000066468, ENSG00000181523, ENSG00000197081, ENSG00000187008, ENSG00000187498, ENSG00000163785, ENSG00000112499, ENSG00000147655, ENSG00000076356, ENSG00000167751, ENSG00000145934, ENSG00000047936, ENSG00000196917, ENSG00000120903, ENSG00000137809, ENSG00000146477, ENSG00000101670, ENSG00000042832, ENSG00000173612, ENSG00000179242, ENSG00000123643, ENSG00000115486, ENSG0000…	223	3295	16383	0.869556	1	1	100
INTERPRO	IPR007110:Immunoglobulin-like	4	1.69492	0.888044	ENSG00000066468, ENSG00000163492, ENSG00000170866, ENSG00000007129	208	356	14459	0.781061	1	0.999982	100
GOTERM_MF_FAT	GO:0030145~manganese ion binding	2	0.847458	0.889219	ENSG00000138696, ENSG00000040199	164	150	11269	0.916179	1	0.998907	100
SP_PIR_KEYWORDS	Secreted	15	6.35593	0.889344	ENSG00000101670, ENSG00000042832, ENSG00000066468, ENSG00000176358, ENSG00000187498, ENSG00000112706, ENSG00000168743, ENSG00000108821, ENSG00000147655, ENSG00000189056, ENSG00000096088, ENSG00000142515, ENSG00000170866, ENSG00000070193, ENSG00000213071	223	1360	16396	0.810934	1	0.992003	100
GOTERM_BP_FAT	GO:0048610~reproductive cellular process	2	0.847458	0.889344	ENSG00000110092, ENSG00000118689	176	146	11767	0.915862	1	0.999605	100
GOTERM_BP_FAT	GO:0051098~regulation of binding	2	0.847458	0.89101	ENSG00000142655, ENSG00000068024	176	147	11767	0.909632	1	0.999618	100
GOTERM_BP_FAT	GO:0009101~glycoprotein biosynthetic process	2	0.847458	0.89101	ENSG00000000419, ENSG00000167080	176	147	11767	0.909632	1	0.999618	100
GOTERM_BP_FAT	GO:0051338~regulation of transferase activity	4	1.69492	0.891331	ENSG00000189056, ENSG00000197114, ENSG00000110092, ENSG00000120889	176	345	11767	0.775165	1	0.999614	100
UP_SEQ_FEATURE	domain:EF-hand 2	2	0.847458	0.891523	ENSG00000115840, ENSG00000115756	223	162	16383	0.906992	1	1	100
UP_SEQ_FEATURE	domain:EF-hand 1	2	0.847458	0.891523	ENSG00000115840, ENSG00000115756	223	162	16383	0.906992	1	1	100
INTERPRO	IPR019775:WD40 repeat, conserved site	3	1.27119	0.892295	ENSG00000072803, ENSG00000120008, ENSG00000115761	208	262	14459	0.795967	1	0.999983	100
GOTERM_BP_FAT	GO:0007276~gamete generation	4	1.69492	0.893597	ENSG00000102230, ENSG00000138696, ENSG00000118689, ENSG00000122574	176	347	11767	0.770697	1	0.999634	100
GOTERM_BP_FAT	GO:0001775~cell activation	3	1.27119	0.896326	ENSG00000005020, ENSG00000068024, ENSG00000172867	176	255	11767	0.786564	1	0.999658	100
GOTERM_MF_FAT	GO:0004721~phosphoprotein phosphatase activity	2	0.847458	0.897106	ENSG00000040199, ENSG00000158615	164	155	11269	0.886625	1	0.999079	100
GOTERM_MF_FAT	GO:0005529~sugar binding	2	0.847458	0.897106	ENSG00000197081, ENSG00000187008	164	155	11269	0.886625	1	0.999079	100
SP_PIR_KEYWORDS	acetylation	29	12.2881	0.897701	ENSG00000136997, ENSG00000142655, ENSG00000105879, ENSG00000168883, ENSG00000168769, ENSG00000197081, ENSG00000179409, ENSG00000140829, ENSG00000000419, ENSG00000173821, ENSG00000184743, ENSG00000118640, ENSG00000167699, ENSG00000063169, ENSG00000157538, ENSG00000163110, ENSG00000138162, ENSG00000141252, ENSG00000139697, ENSG00000160049, ENSG00000115486, ENSG00000177369, ENSG00000166747, ENSG0000…	223	2526	16396	0.844107	1	0.992994	100
INTERPRO	IPR013087:Zinc finger, C2H2-type/integrase, DNA-binding	6	2.54237	0.89825	ENSG00000153814, ENSG00000177311, ENSG00000198740, ENSG00000020256, ENSG00000164651, ENSG00000140836	208	549	14459	0.75972	1	0.999985	100
GOTERM_MF_FAT	GO:0022838~substrate specific channel activity	4	1.69492	0.89833	ENSG00000187008, ENSG00000120903, ENSG00000001626, ENSG00000026559	164	361	11269	0.761367	1	0.99906	100
GOTERM_BP_FAT	GO:0006979~response to oxidative stress	2	0.847458	0.898975	ENSG00000158615, ENSG00000108821	176	152	11767	0.87971	1	0.999681	100
GOTERM_BP_FAT	GO:0019220~regulation of phosphate metabolic process	5	2.11864	0.901229	ENSG00000189056, ENSG00000167641, ENSG00000197114, ENSG00000110092, ENSG00000120889	176	444	11767	0.752905	1	0.999699	100
GOTERM_BP_FAT	GO:0051174~regulation of phosphorus metabolic process	5	2.11864	0.901229	ENSG00000189056, ENSG00000167641, ENSG00000197114, ENSG00000110092, ENSG00000120889	176	444	11767	0.752905	1	0.999699	100
INTERPRO	IPR013032:EGF-like region, conserved site	3	1.27119	0.901869	ENSG00000145934, ENSG00000189056, ENSG00000168743	208	270	14459	0.772382	1	0.999986	100
GOTERM_CC_FAT	GO:0030425~dendrite	2	0.847458	0.901891	ENSG00000189056, ENSG00000047932	160	158	10979	0.868592	1	0.99322	100
GOTERM_BP_FAT	GO:0043062~extracellular structure organization	2	0.847458	0.901997	ENSG00000196586, ENSG00000108821	176	154	11767	0.868285	1	0.999701	100
GOTERM_BP_FAT	GO:0009611~response to wounding	5	2.11864	0.90405	ENSG00000064300, ENSG00000138696, ENSG00000115486, ENSG00000068024, ENSG00000070193	176	447	11767	0.747852	1	0.999716	100
KEGG_PATHWAY	hsa04144:Endocytosis	2	0.847458	0.905172	ENSG00000066468, ENSG00000153317	58	177	4400	0.857199	1	0.977989	100
GOTERM_BP_FAT	GO:0016568~chromatin modification	3	1.27119	0.905939	ENSG00000068024, ENSG00000167085, ENSG00000183955	176	263	11767	0.762638	1	0.999729	100
SMART	SM00320:WD40	3	1.27119	0.906847	ENSG00000072803, ENSG00000120008, ENSG00000115761	127	252	8122	0.761342	1	0.999708	100
GOTERM_CC_FAT	GO:0005615~extracellular space	6	2.54237	0.908286	ENSG00000101670, ENSG00000042832, ENSG00000189056, ENSG00000096088, ENSG00000101126, ENSG00000070193	160	553	10979	0.744507	1	0.993847	100
GOTERM_MF_FAT	GO:0015267~channel activity	4	1.69492	0.908357	ENSG00000187008, ENSG00000120903, ENSG00000001626, ENSG00000026559	164	371	11269	0.740845	1	0.999274	100
GOTERM_MF_FAT	GO:0022803~passive transmembrane transporter activity	4	1.69492	0.908357	ENSG00000187008, ENSG00000120903, ENSG00000001626, ENSG00000026559	164	371	11269	0.740845	1	0.999274	100
SP_PIR_KEYWORDS	mitosis	2	0.847458	0.911616	ENSG00000111859, ENSG00000183955	223	177	16396	0.830787	1	0.994685	100
UP_SEQ_FEATURE	repeat:1	2	0.847458	0.911788	ENSG00000197081, ENSG00000101096	223	177	16383	0.830128	1	1	100
GOTERM_BP_FAT	GO:0009967~positive regulation of signal transduction	3	1.27119	0.912598	ENSG00000189056, ENSG00000070193, ENSG00000120889	176	269	11767	0.745628	1	0.999785	100
SP_PIR_KEYWORDS	nad	2	0.847458	0.912826	ENSG00000167693, ENSG00000175029	223	178	16396	0.82612	1	0.994622	100
GOTERM_CC_FAT	GO:0045177~apical part of cell	2	0.847458	0.912851	ENSG00000091138, ENSG00000001626	160	166	10979	0.826732	1	0.994209	100
GOTERM_MF_FAT	GO:0005506~iron ion binding	3	1.27119	0.913174	ENSG00000145996, ENSG00000168769, ENSG00000147454	164	277	11269	0.744189	1	0.999345	100
GOTERM_BP_FAT	GO:0008015~blood circulation	2	0.847458	0.91321	ENSG00000176358, ENSG00000001626	176	162	11767	0.825407	1	0.999786	100
GOTERM_BP_FAT	GO:0003013~circulatory system process	2	0.847458	0.91321	ENSG00000176358, ENSG00000001626	176	162	11767	0.825407	1	0.999786	100
GOTERM_BP_FAT	GO:0016042~lipid catabolic process	2	0.847458	0.91321	ENSG00000101670, ENSG00000100523	176	162	11767	0.825407	1	0.999786	100
UP_SEQ_FEATURE	zinc finger region:C2H2-type 13	2	0.847458	0.915364	ENSG00000020256, ENSG00000140836	223	180	16383	0.816293	1	1	100
UP_SEQ_FEATURE	repeat:2	2	0.847458	0.915364	ENSG00000197081, ENSG00000101096	223	180	16383	0.816293	1	1	100
SP_PIR_KEYWORDS	protein biosynthesis	2	0.847458	0.916357	ENSG00000132394, ENSG00000177369	223	181	16396	0.812427	1	0.994869	100
SP_PIR_KEYWORDS	transducer	4	1.69492	0.916408	ENSG00000173612, ENSG00000196917, ENSG00000185950, ENSG00000167083	223	407	16396	0.722601	1	0.994662	100
UP_SEQ_FEATURE	repeat:ANK 3	2	0.847458	0.916524	ENSG00000101752, ENSG00000041515	223	181	16383	0.811783	1	1	100
GOTERM_MF_FAT	GO:0070011~peptidase activity, acting on L-amino acid peptides	5	2.11864	0.916577	ENSG00000167751, ENSG00000186094, ENSG00000189056, ENSG00000096088, ENSG00000142515	164	474	11269	0.724825	1	0.999384	100
GOTERM_BP_FAT	GO:0051345~positive regulation of hydrolase activity	2	0.847458	0.917078	ENSG00000136997, ENSG00000120889	176	165	11767	0.810399	1	0.999813	100
GOTERM_CC_FAT	GO:0030529~ribonucleoprotein complex	5	2.11864	0.917951	ENSG00000159217, ENSG00000140830, ENSG00000179409, ENSG00000140829, ENSG00000184209, ENSG00000004846	160	475	10979	0.722303	1	0.994648	100
GOTERM_MF_FAT	GO:0022836~gated channel activity	3	1.27119	0.918221	ENSG00000120903, ENSG00000001626, ENSG00000026559	164	282	11269	0.730994	1	0.999384	100
GOTERM_BP_FAT	GO:0001701~in utero embryonic development	2	0.847458	0.918328	ENSG00000101752, ENSG00000108753	176	166	11767	0.805518	1	0.999818	100
UP_SEQ_FEATURE	repeat:WD 6	2	0.847458	0.918796	ENSG00000072803, ENSG00000120008	223	183	16383	0.802911	1	1	100
UP_SEQ_FEATURE	zinc finger region:C2H2-type 10	3	1.27119	0.920128	ENSG00000177311, ENSG00000101493, ENSG00000020256	223	304	16383	0.724997	1	1	100
GOTERM_BP_FAT	GO:0044057~regulation of system process	3	1.27119	0.920794	ENSG00000176358, ENSG00000068024, ENSG00000196586	176	277	11767	0.724093	1	0.999832	100
INTERPRO	IPR008957:Fibronectin, type III-like fold	2	0.847458	0.921046	ENSG00000100505, ENSG00000047936	208	175	14459	0.794451	1	0.999994	100
GOTERM_BP_FAT	GO:0031401~positive regulation of protein modification process	2	0.847458	0.923147	ENSG00000110092, ENSG00000068024	176	170	11767	0.786564	1	0.999845	100
INTERPRO	IPR003598:Immunoglobulin subtype 2	2	0.847458	0.923318	ENSG00000066468, ENSG00000007129	208	177	14459	0.785474	1	0.999994	100
GOTERM_CC_FAT	GO:0044433~cytoplasmic vesicle part	2	0.847458	0.923733	ENSG00000001626, ENSG00000196586	160	175	10979	0.784214	1	0.995176	100
UP_SEQ_FEATURE	topological domain:Lumenal	4	1.69492	0.925958	ENSG00000115486, ENSG00000197081, ENSG00000167080, ENSG00000184743	223	419	16383	0.70135	1	1	100
INTERPRO	IPR003961:Fibronectin, type III	2	0.847458	0.927668	ENSG00000100505, ENSG00000047936	208	181	14459	0.768115	1	0.999995	100
GOTERM_BP_FAT	GO:0051248~negative regulation of protein metabolic process	2	0.847458	0.927682	ENSG00000159217, ENSG00000198625	176	174	11767	0.768482	1	0.999871	100
GOTERM_BP_FAT	GO:0006163~purine nucleotide metabolic process	2	0.847458	0.927682	ENSG00000166377, ENSG00000054793	176	174	11767	0.768482	1	0.999871	100
GOTERM_BP_FAT	GO:0042060~wound healing	2	0.847458	0.927682	ENSG00000115486, ENSG00000070193	176	174	11767	0.768482	1	0.999871	100
GOTERM_BP_FAT	GO:0022613~ribonucleoprotein complex biogenesis	2	0.847458	0.927682	ENSG00000168883, ENSG00000179409	176	174	11767	0.768482	1	0.999871	100
GOTERM_CC_FAT	GO:0000785~chromatin	2	0.847458	0.930226	ENSG00000101868, ENSG00000136982	160	181	10979	0.758218	1	0.995784	100
GOTERM_BP_FAT	GO:0034470~ncRNA processing	2	0.847458	0.931951	ENSG00000179409, ENSG00000124217	176	178	11767	0.751213	1	0.999893	100
GOTERM_BP_FAT	GO:0015672~monovalent inorganic cation transport	3	1.27119	0.934258	ENSG00000123643, ENSG00000112337, ENSG00000026559	176	292	11767	0.686897	1	0.999902	100
GOTERM_BP_FAT	GO:0007600~sensory perception	4	1.69492	0.935295	ENSG00000136997, ENSG00000112706, ENSG00000196586, ENSG00000108821	176	393	11767	0.680488	1	0.999905	100
SP_PIR_KEYWORDS	DNA damage	2	0.847458	0.935641	ENSG00000182185, ENSG00000110092	223	200	16396	0.735247	1	0.996785	100
GOTERM_CC_FAT	GO:0009898~internal side of plasma membrane	3	1.27119	0.936918	ENSG00000142655, ENSG00000167083, ENSG00000166747	160	303	10979	0.679394	1	0.996395	100
GOTERM_BP_FAT	GO:0051046~regulation of secretion	2	0.847458	0.936937	ENSG00000176358, ENSG00000196586	176	183	11767	0.730688	1	0.999911	100
SP_PIR_KEYWORDS	glycosyltransferase	2	0.847458	0.937393	ENSG00000000419, ENSG00000167080	223	202	16396	0.727967	1	0.996828	100
GOTERM_BP_FAT	GO:0046649~lymphocyte activation	2	0.847458	0.93789	ENSG00000005020, ENSG00000068024	176	184	11767	0.726717	1	0.999913	100
GOTERM_MF_FAT	GO:0046873~metal ion transmembrane transporter activity	3	1.27119	0.938097	ENSG00000147454, ENSG00000120903, ENSG00000026559	164	305	11269	0.67587	1	0.999712	100
GOTERM_BP_FAT	GO:0019953~sexual reproduction	4	1.69492	0.938101	ENSG00000102230, ENSG00000138696, ENSG00000118689, ENSG00000122574	176	397	11767	0.673632	1	0.999912	100
SP_PIR_KEYWORDS	chromatin regulator	2	0.847458	0.938251	ENSG00000068024, ENSG00000183955	223	203	16396	0.724381	1	0.996779	100
GOTERM_CC_FAT	GO:0005576~extracellular region	18	7.62712	0.938362	ENSG00000101670, ENSG00000042832, ENSG00000066468, ENSG00000176358, ENSG00000187498, ENSG00000112706, ENSG00000168743, ENSG00000108821, ENSG00000147655, ENSG00000167642, ENSG00000189056, ENSG00000096088, ENSG00000101126, ENSG00000167083, ENSG00000142515, ENSG00000170866, ENSG00000070193, ENSG00000213071	160	1597	10979	0.773411	1	0.996384	100
SMART	SM00408:IGc2	2	0.847458	0.939072	ENSG00000066468, ENSG00000007129	127	177	8122	0.72263	1	0.999911	100
INTERPRO	IPR018249:EF-HAND 2	2	0.847458	0.94018	ENSG00000115840, ENSG00000115756	208	194	14459	0.716644	1	0.999998	100
UP_SEQ_FEATURE	zinc finger region:C2H2-type 6	4	1.69492	0.940568	ENSG00000177311, ENSG00000198740, ENSG00000101493, ENSG00000020256	223	441	16383	0.666362	1	1	100
GOTERM_BP_FAT	GO:0010647~positive regulation of cell communication	3	1.27119	0.941269	ENSG00000189056, ENSG00000070193, ENSG00000120889	176	301	11767	0.666358	1	0.999925	100
INTERPRO	IPR018247:EF-HAND 1	2	0.847458	0.941904	ENSG00000115840, ENSG00000115756	208	196	14459	0.709331	1	0.999998	100
UP_SEQ_FEATURE	zinc finger region:C2H2-type 2	5	2.11864	0.942101	ENSG00000153814, ENSG00000101493, ENSG00000020256, ENSG00000164651, ENSG00000140836	223	548	16383	0.670314	1	1	100
SMART	SM00060:FN3	2	0.847458	0.942847	ENSG00000100505, ENSG00000047936	127	181	8122	0.70666	1	0.999907	100
GOTERM_BP_FAT	GO:0032940~secretion by cell	2	0.847458	0.943313	ENSG00000108753, ENSG00000196586	176	190	11767	0.703768	1	0.999931	100
INTERPRO	IPR000504:RNA recognition motif, RNP-1	2	0.847458	0.943578	ENSG00000159217, ENSG00000184209, ENSG00000004846	208	198	14459	0.702166	1	0.999998	100
GOTERM_CC_FAT	GO:0031225~anchored to membrane	2	0.847458	0.944154	ENSG00000091844, ENSG00000150672	160	196	10979	0.700191	1	0.996881	100
GOTERM_BP_FAT	GO:0048514~blood vessel morphogenesis	2	0.847458	0.94417	ENSG00000070193, ENSG00000163874	176	191	11767	0.700083	1	0.999933	100
INTERPRO	IPR012677:Nucleotide-binding, alpha-beta plait	2	0.847458	0.944397	ENSG00000159217, ENSG00000184209, ENSG00000004846	208	199	14459	0.698637	1	0.999998	100
GOTERM_BP_FAT	GO:0006631~fatty acid metabolic process	2	0.847458	0.945014	ENSG00000197977, ENSG00000164181	176	192	11767	0.696437	1	0.999935	100
GOTERM_BP_FAT	GO:0007601~visual perception	2	0.847458	0.945845	ENSG00000112706, ENSG00000108821	176	193	11767	0.692829	1	0.999937	100
GOTERM_BP_FAT	GO:0050953~sensory perception of light stimulus	2	0.847458	0.945845	ENSG00000112706, ENSG00000108821	176	193	11767	0.692829	1	0.999937	100
GOTERM_BP_FAT	GO:0007186~G-protein coupled receptor protein signaling pathway	6	2.54237	0.946009	ENSG00000173612, ENSG00000176358, ENSG00000105851, ENSG00000196917, ENSG00000167083, ENSG00000187008	176	596	11767	0.673067	1	0.999936	100
GOTERM_MF_FAT	GO:0004175~endopeptidase activity	3	1.27119	0.947219	ENSG00000167751, ENSG00000096088, ENSG00000142515	164	318	11269	0.64824	1	0.999807	100
GOTERM_BP_FAT	GO:0044092~negative regulation of molecular function	3	1.27119	0.952022	ENSG00000142655, ENSG00000197114, ENSG00000068024	176	317	11767	0.632725	1	0.999955	100
INTERPRO	IPR011992:EF-Hand type	2	0.847458	0.953349	ENSG00000115840, ENSG00000115756	208	211	14459	0.658904	1	0.999999	100
GOTERM_BP_FAT	GO:0048609~reproductive process in a multicellular organism	4	1.69492	0.955831	ENSG00000102230, ENSG00000138696, ENSG00000118689, ENSG00000122574	176	427	11767	0.626304	1	0.999965	100
GOTERM_BP_FAT	GO:0032504~multicellular organism reproduction	4	1.69492	0.955831	ENSG00000102230, ENSG00000138696, ENSG00000118689, ENSG00000122574	176	427	11767	0.626304	1	0.999965	100
SMART	SM00360:RRM	2	0.847458	0.956465	ENSG00000159217, ENSG00000184209, ENSG00000004846	127	198	8122	0.645987	1	0.99995	100
UP_SEQ_FEATURE	zinc finger region:C2H2-type 12	2	0.847458	0.957585	ENSG00000020256, ENSG00000140836	223	230	16383	0.638838	1	1	100
GOTERM_BP_FAT	GO:0034621~cellular macromolecular complex subunit organization	3	1.27119	0.957764	ENSG00000168883, ENSG00000179409, ENSG00000127989	176	327	11767	0.613376	1	0.999969	100
GOTERM_CC_FAT	GO:0031980~mitochondrial lumen	2	0.847458	0.959736	ENSG00000005882, ENSG00000127989	160	218	10979	0.62953	1	0.998286	100
GOTERM_CC_FAT	GO:0005759~mitochondrial matrix	2	0.847458	0.959736	ENSG00000005882, ENSG00000127989	160	218	10979	0.62953	1	0.998286	100
GOTERM_BP_FAT	GO:0032270~positive regulation of cellular protein metabolic process	2	0.847458	0.961867	ENSG00000110092, ENSG00000068024	176	216	11767	0.619055	1	0.999977	100
GOTERM_BP_FAT	GO:0045321~leukocyte activation	2	0.847458	0.962444	ENSG00000005020, ENSG00000068024	176	217	11767	0.616202	1	0.999978	100
GOTERM_BP_FAT	GO:0030036~actin cytoskeleton organization	2	0.847458	0.962444	ENSG00000111859, ENSG00000073712	176	217	11767	0.616202	1	0.999978	100
SP_PIR_KEYWORDS	serine/threonine-protein kinase	3	1.27119	0.963161	ENSG00000138696, ENSG00000127914, ENSG00000164715	223	372	16396	0.592941	1	0.998831	100
UP_SEQ_FEATURE	zinc finger region:C2H2-type 5	4	1.69492	0.963306	ENSG00000177311, ENSG00000198740, ENSG00000101493, ENSG00000020256	223	488	16383	0.602183	1	1	100
GOTERM_BP_FAT	GO:0034660~ncRNA metabolic process	2	0.847458	0.963574	ENSG00000179409, ENSG00000124217	176	219	11767	0.610575	1	0.999979	100
INTERPRO	IPR019781:WD40 repeat, subgroup	2	0.847458	0.963629	ENSG00000072803, ENSG00000120008	208	228	14459	0.609776	1	1	100
GOTERM_BP_FAT	GO:0044093~positive regulation of molecular function	5	2.11864	0.963893	ENSG00000136997, ENSG00000189056, ENSG00000110092, ENSG00000068024, ENSG00000120889	176	543	11767	0.615635	1	0.999979	100
SP_PIR_KEYWORDS	Signal-anchor	3	1.27119	0.965247	ENSG00000203896, ENSG00000145934, ENSG00000167080	223	377	16396	0.585077	1	0.998907	100
GOTERM_BP_FAT	GO:0051276~chromosome organization	4	1.69492	0.966092	ENSG00000136982, ENSG00000068024, ENSG00000167085, ENSG00000183955	176	450	11767	0.594293	1	0.999983	100
GOTERM_MF_FAT	GO:0003702~RNA polymerase II transcription factor activity	2	0.847458	0.966153	ENSG00000125398, ENSG00000140836	164	230	11269	0.597508	1	0.999943	100
GOTERM_BP_FAT	GO:0006511~ubiquitin-dependent protein catabolic process	2	0.847458	0.966763	ENSG00000168883, ENSG00000107669	176	225	11767	0.594293	1	0.999983	100
GOTERM_BP_FAT	GO:0051247~positive regulation of protein metabolic process	2	0.847458	0.967267	ENSG00000110092, ENSG00000068024	176	226	11767	0.591663	1	0.999984	100
GOTERM_MF_FAT	GO:0016791~phosphatase activity	2	0.847458	0.968108	ENSG00000040199, ENSG00000158615	164	234	11269	0.587294	1	0.999948	100
GOTERM_BP_FAT	GO:0006325~chromatin organization	3	1.27119	0.968178	ENSG00000068024, ENSG00000167085, ENSG00000183955	176	349	11767	0.57471	1	0.999985	100
GOTERM_BP_FAT	GO:0048878~chemical homeostasis	4	1.69492	0.969104	ENSG00000101670, ENSG00000136997, ENSG00000185950, ENSG00000118689	176	458	11767	0.583912	1	0.999986	100
GOTERM_MF_FAT	GO:0003723~RNA binding	6	2.54237	0.96962	ENSG00000132394, ENSG00000159217, ENSG00000068784, ENSG00000177369, ENSG00000171861, ENSG00000184209, ENSG00000004846	164	672	11269	0.613513	1	0.999951	100
GOTERM_BP_FAT	GO:0048534~hemopoietic or lymphoid organ development	2	0.847458	0.971035	ENSG00000068024, ENSG00000070193	176	234	11767	0.571436	1	0.999988	100
SP_PIR_KEYWORDS	rna-binding	4	1.69492	0.97226	ENSG00000159217, ENSG00000068784, ENSG00000177369, ENSG00000184209, ENSG00000004846	223	515	16396	0.571065	1	0.99927	100
UP_SEQ_FEATURE	active site:Proton acceptor	5	2.11864	0.973262	ENSG00000066468, ENSG00000138696, ENSG00000047936, ENSG00000163785, ENSG00000164715	223	629	16383	0.583993	1	1	100
SP_PIR_KEYWORDS	oxidoreductase	4	1.69492	0.973694	ENSG00000168769, ENSG00000167693, ENSG00000102967, ENSG00000175029	223	520	16396	0.565574	1	0.999308	100
GOTERM_BP_FAT	GO:0050877~neurological system process	7	2.9661	0.973875	ENSG00000146477, ENSG00000136997, ENSG00000170579, ENSG00000127914, ENSG00000112706, ENSG00000196586, ENSG00000108821	176	762	11767	0.614181	1	0.999991	100
UP_SEQ_FEATURE	zinc finger region:C2H2-type 11	2	0.847458	0.973882	ENSG00000020256, ENSG00000140836	223	265	16383	0.554463	1	1	100
GOTERM_MF_FAT	GO:0005261~cation channel activity	2	0.847458	0.975608	ENSG00000120903, ENSG00000026559	164	252	11269	0.545345	1	0.999972	100
GOTERM_BP_FAT	GO:0043085~positive regulation of catalytic activity	4	1.69492	0.975858	ENSG00000136997, ENSG00000189056, ENSG00000110092, ENSG00000120889	176	479	11767	0.558313	1	0.999993	100
GOTERM_CC_FAT	GO:0005789~endoplasmic reticulum membrane	2	0.847458	0.97646	ENSG00000000419, ENSG00000001626	160	254	10979	0.540305	1	0.999369	100
GOTERM_BP_FAT	GO:0002520~immune system development	2	0.847458	0.976974	ENSG00000068024, ENSG00000070193	176	249	11767	0.537012	1	0.999994	100
GOTERM_BP_FAT	GO:0055114~oxidation reduction	5	2.11864	0.977081	ENSG00000168769, ENSG00000115840, ENSG00000167693, ENSG00000102967, ENSG00000175029	176	585	11767	0.571436	1	0.999994	100
GOTERM_BP_FAT	GO:0050890~cognition	4	1.69492	0.977247	ENSG00000136997, ENSG00000112706, ENSG00000196586, ENSG00000108821	176	484	11767	0.552545	1	0.999994	100
GOTERM_BP_FAT	GO:0006954~inflammatory response	2	0.847458	0.980841	ENSG00000138696, ENSG00000068024	176	261	11767	0.512321	1	0.999996	100
INTERPRO	IPR003599:Immunoglobulin subtype	2	0.847458	0.980931	ENSG00000170866, ENSG00000007129	208	272	14459	0.511135	1	1	100
GOTERM_CC_FAT	GO:0042175~nuclear envelope-endoplasmic reticulum network	2	0.847458	0.981188	ENSG00000000419, ENSG00000001626	160	269	10979	0.510177	1	0.999566	100
GOTERM_BP_FAT	GO:0031399~regulation of protein modification process	2	0.847458	0.982254	ENSG00000110092, ENSG00000068024	176	266	11767	0.502691	1	0.999997	100
GOTERM_BP_FAT	GO:0007283~spermatogenesis	2	0.847458	0.982524	ENSG00000102230, ENSG00000122574	176	267	11767	0.500809	1	0.999997	100
GOTERM_BP_FAT	GO:0048232~male gamete generation	2	0.847458	0.982524	ENSG00000102230, ENSG00000122574	176	267	11767	0.500809	1	0.999997	100
SP_PIR_KEYWORDS	ubl conjugation	4	1.69492	0.983258	ENSG00000091844, ENSG00000101752, ENSG00000110092, ENSG00000068024	223	562	16396	0.523307	1	0.999702	100
GOTERM_BP_FAT	GO:0006281~DNA repair	2	0.847458	0.983564	ENSG00000101868, ENSG00000182185	176	271	11767	0.493417	1	0.999997	100
UP_SEQ_FEATURE	transit peptide:Mitochondrion	3	1.27119	0.983782	ENSG00000005882, ENSG00000102967, ENSG00000127989	223	441	16383	0.499771	1	1	100
GOTERM_BP_FAT	GO:0007610~behavior	3	1.27119	0.984547	ENSG00000189056, ENSG00000196586, ENSG00000070193	176	404	11767	0.49647	1	0.999998	100
GOTERM_MF_FAT	GO:0004674~protein serine/threonine kinase activity	3	1.27119	0.98494	ENSG00000138696, ENSG00000127914, ENSG00000164715	164	417	11269	0.494341	1	0.999992	100
SP_PIR_KEYWORDS	transit peptide	3	1.27119	0.985384	ENSG00000005882, ENSG00000102967, ENSG00000127989	223	450	16396	0.490164	1	0.999759	100
SMART	SM00409:IG	2	0.847458	0.986778	ENSG00000170866, ENSG00000007129	127	272	8122	0.470241	1	0.999998	100
GOTERM_CC_FAT	GO:0005694~chromosome	3	1.27119	0.987566	ENSG00000101868, ENSG00000136982, ENSG00000183955	160	431	10979	0.477625	1	0.999792	100
GOTERM_BP_FAT	GO:0034622~cellular macromolecular complex assembly	2	0.847458	0.987722	ENSG00000168883, ENSG00000179409	176	290	11767	0.461089	1	0.999999	100
GOTERM_BP_FAT	GO:0006412~translation	2	0.847458	0.989308	ENSG00000132394, ENSG00000177369	176	299	11767	0.44721	1	0.999999	100
GOTERM_BP_FAT	GO:0030001~metal ion transport	3	1.27119	0.989659	ENSG00000112337, ENSG00000147454, ENSG00000026559	176	434	11767	0.462152	1	0.999999	100
UP_SEQ_FEATURE	zinc finger region:C2H2-type 9	2	0.847458	0.991045	ENSG00000177311, ENSG00000020256	223	342	16383	0.429628	1	1	100
GOTERM_CC_FAT	GO:0044432~endoplasmic reticulum part	2	0.847458	0.991877	ENSG00000000419, ENSG00000001626	160	325	10979	0.422269	1	0.999901	100
GOTERM_BP_FAT	GO:0040008~regulation of growth	2	0.847458	0.992261	ENSG00000111859, ENSG00000179242	176	320	11767	0.417862	1	1	100
SP_PIR_KEYWORDS	g-protein coupled receptor	2	0.847458	0.992288	ENSG00000173612, ENSG00000196917	223	353	16396	0.41657	1	0.999927	100
GOTERM_BP_FAT	GO:0042592~homeostatic process	5	2.11864	0.992472	ENSG00000101670, ENSG00000136997, ENSG00000185950, ENSG00000167693, ENSG00000118689	176	683	11767	0.489443	1	1	100
GOTERM_BP_FAT	GO:0006952~defense response	3	1.27119	0.993207	ENSG00000138696, ENSG00000068024, ENSG00000170866	176	465	11767	0.431342	1	1	100
INTERPRO	IPR008271:Serine/threonine protein kinase, active site	2	0.847458	0.993592	ENSG00000138696, ENSG00000127914	208	346	14459	0.401817	1	1	100
INTERPRO	IPR017442:Serine/threonine protein kinase-related	2	0.847458	0.99396	ENSG00000138696, ENSG00000127914	208	350	14459	0.397225	1	1	100
GOTERM_BP_FAT	GO:0007243~protein kinase cascade	2	0.847458	0.994737	ENSG00000133056, ENSG00000120889	176	345	11767	0.387582	1	1	100
GOTERM_CC_FAT	GO:0044427~chromosomal part	2	0.847458	0.995347	ENSG00000101868, ENSG00000136982	160	362	10979	0.379109	1	0.999963	100
GOTERM_BP_FAT	GO:0006955~immune response	3	1.27119	0.996489	ENSG00000203896, ENSG00000165406, ENSG00000170866	176	513	11767	0.390982	1	1	100
GOTERM_MF_FAT	GO:0008289~lipid binding	2	0.847458	0.997922	ENSG00000106069, ENSG00000133056	164	416	11269	0.330353	1	1	100
GOTERM_BP_FAT	GO:0019725~cellular homeostasis	2	0.847458	0.998428	ENSG00000136997, ENSG00000167693	176	423	11767	0.316113	1	1	100
BBID	62.G1-phase_progression_by_Myc	1	0.423729	1	ENSG00000136997	6	5	315	10.5	1	1	100
BBID	104.Insulin_signaling	1	0.423729	1	ENSG00000005882	6	14	315	3.75	1	1	100
BBID	83.Growth_factors_Survival_factors_Mitogens	1	0.423729	1	ENSG00000177369	6	10	315	5.25	1	1	100
BBID	105.Signaling_glucose_uptake	1	0.423729	1	ENSG00000005882	6	10	315	5.25	1	1	100
BBID	99.NF-kB_activation	1	0.423729	1	ENSG00000136997	6	17	315	3.08824	1	1	100
BBID	67.Ikaros_and_signaling_inhibitors	1	0.423729	1	ENSG00000101096	6	16	315	3.28125	1	1	100
BBID	106.Glycogen_synthase-synthesis	1	0.423729	1	ENSG00000005882	6	8	315	6.5625	1	1	100
BIOCARTA	h_g1Pathway:Cell Cycle: G1/S Check Point	1	0.423729	1	ENSG00000110092	13	25	1307	4.02154	1	1	100
BIOCARTA	h_arfPathway:Tumor Suppressor Arf Inhibits Ribosomal Biogenesis	1	0.423729	1	ENSG00000068654	13	11	1307	9.13986	1	1	100
BIOCARTA	h_tnfr1Pathway:TNFR1 Signaling Pathway	1	0.423729	1	ENSG00000160049	13	28	1307	3.59066	1	1	100
BIOCARTA	h_SARSpathway:SARS Coronavirus Protease	1	0.423729	1	ENSG00000177369	13	8	1307	12.5673	1	1	100
BIOCARTA	h_iresPathway:Internal Ribosome entry pathway	1	0.423729	1	ENSG00000177369	13	6	1307	16.7564	1	1	100
BIOCARTA	h_akapCentrosomePathway:Protein Kinase A at the Centrosome	1	0.423729	1	ENSG00000127914	13	13	1307	7.73373	1	1	100
BIOCARTA	h_cftrPathway:Cystic fibrosis transmembrane conductance regulator (CFTR) and beta 2 adrenergic receptor (b2AR) pathway	1	0.423729	1	ENSG00000001626	13	7	1307	14.3626	1	1	100
BIOCARTA	h_btg2Pathway:BTG family proteins and cell cycle regulation	1	0.423729	1	ENSG00000110092	13	9	1307	11.1709	1	1	100
BIOCARTA	h_mitochondriaPathway:Role of Mitochondria in Apoptotic Signaling	1	0.423729	1	ENSG00000160049	13	22	1307	4.56993	1	1	100
BIOCARTA	h_setPathway:Granzyme A mediated Apoptosis Pathway	1	0.423729	1	ENSG00000160049	13	9	1307	11.1709	1	1	100
BIOCARTA	h_PDZsPathway:Synaptic Proteins at the Synaptic Junction	1	0.423729	1	ENSG00000150672	13	18	1307	5.58547	1	1	100
BIOCARTA	h_nuclearRsPathway:Nuclear Receptors in Lipid Metabolism and Toxicity	1	0.423729	1	ENSG00000172819	13	36	1307	2.79274	1	1	100
BIOCARTA	h_caspasePathway:Caspase Cascade in Apoptosis	1	0.423729	1	ENSG00000160049	13	21	1307	4.78755	1	1	100
BIOCARTA	h_wntPathway:WNT Signaling Pathway	1	0.423729	1	ENSG00000110092	13	25	1307	4.02154	1	1	100
BIOCARTA	h_p53Pathway:p53 Signaling Pathway	1	0.423729	1	ENSG00000110092	13	17	1307	5.91403	1	1	100
BIOCARTA	h_achPathway:Role of nicotinic acetylcholine receptors in the regulation of apoptosis	1	0.423729	1	ENSG00000118689	13	13	1307	7.73373	1	1	100
BIOCARTA	h_cellcyclePathway:Cyclins and Cell Cycle Regulation	1	0.423729	1	ENSG00000110092	13	21	1307	4.78755	1	1	100
BIOCARTA	h_RacCycDPathway:Influence of Ras and Rho proteins on G1 to S Transition	1	0.423729	1	ENSG00000110092	13	24	1307	4.1891	1	1	100
BIOCARTA	h_HivnefPathway:HIV-I Nef: negative effector of Fas and TNF	1	0.423729	1	ENSG00000160049	13	48	1307	2.09455	1	1	100
BIOCARTA	h_longevityPathway:The IGF-1 Receptor and Longevity	1	0.423729	1	ENSG00000118689	13	10	1307	10.0538	1	1	100
BIOCARTA	h_fasPathway:FAS signaling pathway ( CD95 )	1	0.423729	1	ENSG00000160049	13	29	1307	3.46684	1	1	100
BIOCARTA	h_cdk5Pathway:Phosphorylation of MEK1 by cdk5/p35 down regulates the MAP kinase pathway	1	0.423729	1	ENSG00000064300	13	11	1307	9.13986	1	1	100
BIOCARTA	h_eifPathway:Eukaryotic protein translation	1	0.423729	1	ENSG00000177369	13	8	1307	12.5673	1	1	100
BIOCARTA	h_ngfPathway:Nerve growth factor pathway (NGF)	1	0.423729	1	ENSG00000064300	13	16	1307	6.28365	1	1	100
BIOCARTA	h_DNAfragmentPathway:Apoptotic DNA fragmentation and tissue homeostasis	1	0.423729	1	ENSG00000160049	13	9	1307	11.1709	1	1	100
BIOCARTA	h_arapPathway:ADP-Ribosylation Factor	1	0.423729	1	ENSG00000153317	13	17	1307	5.91403	1	1	100
BIOCARTA	h_gsk3Pathway:Inactivation of Gsk3 by AKT causes accumulation of b-catenin in Alveolar Macrophages	1	0.423729	1	ENSG00000110092	13	27	1307	3.72365	1	1	100
BIOCARTA	h_aktPathway:AKT Signaling Pathway	1	0.423729	1	ENSG00000118689	13	18	1307	5.58547	1	1	100
BIOCARTA	h_ranbp2Pathway:Sumoylation by RanBP2 Regulates Transcriptional Repression	1	0.423729	1	ENSG00000068024	13	11	1307	9.13986	1	1	100
BIOCARTA	h_deathPathway:Induction of apoptosis through DR3 and DR4/5 Death Receptors	1	0.423729	1	ENSG00000160049	13	28	1307	3.59066	1	1	100
BIOCARTA	h_carm-erPathway:CARM1 and Regulation of the Estrogen Receptor	1	0.423729	1	ENSG00000110092	13	24	1307	4.1891	1	1	100
BIOCARTA	h_erkPathway:Erk1/Erk2 Mapk Signaling pathway	1	0.423729	1	ENSG00000064300	13	27	1307	3.72365	1	1	100
COG_ONTOLOGY	Defense mechanisms	1	0.423729	1	ENSG00000184209, ENSG00000004846	23	21	1828	3.78468	1	1	100
COG_ONTOLOGY	Inorganic ion transport and metabolism	1	0.423729	1	ENSG00000181523	23	26	1828	3.05686	1	1	100
COG_ONTOLOGY	Cell envelope biogenesis, outer membrane	1	0.423729	1	ENSG00000145934	23	17	1828	4.67519	1	1	100
COG_ONTOLOGY	Carbohydrate transport and metabolism	1	0.423729	1	ENSG00000160190	23	33	1828	2.40843	1	1	100
COG_ONTOLOGY	Signal transduction mechanisms / Cytoskeleton / Cell division and chromosome partitioning / General function prediction only	1	0.423729	1	ENSG00000115756	23	42	1828	1.89234	1	1	100
COG_ONTOLOGY	Nucleotide transport and metabolism	1	0.423729	1	ENSG00000102967	23	11	1828	7.2253	1	1	100
COG_ONTOLOGY	Transcription / Cell division and chromosome partitioning	1	0.423729	1	ENSG00000153814	23	63	1828	1.26156	1	1	100
COG_ONTOLOGY	Carbohydrate transport and metabolism / Amino acid transport and metabolism / Inorganic ion transport and metabolism / General function prediction only	1	0.423729	1	ENSG00000175003	23	1	1828	79.4783	1	1	100
COG_ONTOLOGY	Chromatin structure and dynamics / Secondary metabolites biosynthesis, transport, and catabolism	1	0.423729	1	ENSG00000068024	23	8	1828	9.93478	1	1	100
COG_ONTOLOGY	Cell division and chromosome partitioning	1	0.423729	1	ENSG00000136848	23	102	1828	0.779199	1	1	100
GOTERM_BP_FAT	GO:0009218~pyrimidine ribonucleotide metabolic process	1	0.423729	1	ENSG00000102967	176	15	11767	4.4572	1	1	100
GOTERM_BP_FAT	GO:0044259~multicellular organismal macromolecule metabolic process	1	0.423729	1	ENSG00000108821	176	29	11767	2.30545	1	1	100
GOTERM_BP_FAT	GO:0045913~positive regulation of carbohydrate metabolic process	1	0.423729	1	ENSG00000185950	176	19	11767	3.51884	1	1	100
GOTERM_BP_FAT	GO:0001544~initiation of primordial ovarian follicle growth	1	0.423729	1	ENSG00000118689	176	1	11767	66.858	1	1	100
GOTERM_BP_FAT	GO:0006270~DNA replication initiation	1	0.423729	1	ENSG00000101868	176	16	11767	4.17862	1	1	100
GOTERM_BP_FAT	GO:0045648~positive regulation of erythrocyte differentiation	1	0.423729	1	ENSG00000118689	176	11	11767	6.078	1	1	100
GOTERM_BP_FAT	GO:0032376~positive regulation of cholesterol transport	1	0.423729	1	ENSG00000101670	176	7	11767	9.55114	1	1	100
GOTERM_BP_FAT	GO:0009617~response to bacterium	1	0.423729	1	ENSG00000042832	176	138	11767	0.484478	1	1	100
GOTERM_BP_FAT	GO:0032371~regulation of sterol transport	1	0.423729	1	ENSG00000101670	176	17	11767	3.93282	1	1	100
GOTERM_BP_FAT	GO:0021675~nerve development	1	0.423729	1	ENSG00000064300	176	22	11767	3.039	1	1	100
GOTERM_BP_FAT	GO:0019720~Mo-molybdopterin cofactor metabolic process	1	0.423729	1	ENSG00000124217	176	6	11767	11.143	1	1	100
GOTERM_BP_FAT	GO:0021761~limbic system development	1	0.423729	1	ENSG00000172201	176	29	11767	2.30545	1	1	100
GOTERM_BP_FAT	GO:0031122~cytoplasmic microtubule organization	1	0.423729	1	ENSG00000138162	176	8	11767	8.35724	1	1	100
GOTERM_BP_FAT	GO:0009880~embryonic pattern specification	1	0.423729	1	ENSG00000070193	176	28	11767	2.38778	1	1	100
GOTERM_BP_FAT	GO:0022029~telencephalon cell migration	1	0.423729	1	ENSG00000189056	176	16	11767	4.17862	1	1	100
GOTERM_BP_FAT	GO:0043489~RNA stabilization	1	0.423729	1	ENSG00000159217	176	15	11767	4.4572	1	1	100
GOTERM_BP_FAT	GO:0042999~regulation of Golgi to plasma membrane CFTR protein transport	1	0.423729	1	ENSG00000047932	176	1	11767	66.858	1	1	100
GOTERM_BP_FAT	GO:0048265~response to pain	1	0.423729	1	ENSG00000189056	176	17	11767	3.93282	1	1	100
GOTERM_BP_FAT	GO:0021915~neural tube development	1	0.423729	1	ENSG00000101752	176	63	11767	1.06124	1	1	100
GOTERM_BP_FAT	GO:0043388~positive regulation of DNA binding	1	0.423729	1	ENSG00000068024	176	67	11767	0.99788	1	1	100
GOTERM_BP_FAT	GO:0055123~digestive system development	1	0.423729	1	ENSG00000137166	176	19	11767	3.51884	1	1	100
GOTERM_BP_FAT	GO:0000075~cell cycle checkpoint	1	0.423729	1	ENSG00000110092	176	88	11767	0.759749	1	1	100
GOTERM_BP_FAT	GO:0001826~inner cell mass cell differentiation	1	0.423729	1	ENSG00000108753	176	2	11767	33.429	1	1	100
GOTERM_BP_FAT	GO:0050930~induction of positive chemotaxis	1	0.423729	1	ENSG00000070193	176	8	11767	8.35724	1	1	100
GOTERM_BP_FAT	GO:0045937~positive regulation of phosphate metabolic process	1	0.423729	1	ENSG00000110092	176	85	11767	0.786564	1	1	100
GOTERM_BP_FAT	GO:0043691~reverse cholesterol transport	1	0.423729	1	ENSG00000101670	176	13	11767	5.14292	1	1	100
GOTERM_BP_FAT	GO:0046326~positive regulation of glucose import	1	0.423729	1	ENSG00000185950	176	22	11767	3.039	1	1	100
GOTERM_BP_FAT	GO:0007029~endoplasmic reticulum organization	1	0.423729	1	ENSG00000184743	176	12	11767	5.5715	1	1	100
GOTERM_BP_FAT	GO:0010830~regulation of myotube differentiation	1	0.423729	1	ENSG00000068024	176	5	11767	13.3716	1	1	100
GOTERM_BP_FAT	GO:0042474~middle ear morphogenesis	1	0.423729	1	ENSG00000136997	176	13	11767	5.14292	1	1	100
GOTERM_BP_FAT	GO:0001837~epithelial to mesenchymal transition	1	0.423729	1	ENSG00000125398	176	18	11767	3.71433	1	1	100
GOTERM_BP_FAT	GO:0002098~tRNA wobble uridine modification	1	0.423729	1	ENSG00000124217	176	4	11767	16.7145	1	1	100
GOTERM_BP_FAT	GO:0014898~cardiac muscle hypertrophy	1	0.423729	1	ENSG00000068024	176	3	11767	22.286	1	1	100
GOTERM_BP_FAT	GO:0050771~negative regulation of axonogenesis	1	0.423729	1	ENSG00000064300	176	22	11767	3.039	1	1	100
GOTERM_BP_FAT	GO:0000077~DNA damage checkpoint	1	0.423729	1	ENSG00000110092	176	46	11767	1.45343	1	1	100
GOTERM_BP_FAT	GO:0060325~face morphogenesis	1	0.423729	1	ENSG00000108821	176	9	11767	7.42866	1	1	100
GOTERM_BP_FAT	GO:0051385~response to mineralocorticoid stimulus	1	0.423729	1	ENSG00000110092	176	17	11767	3.93282	1	1	100
GOTERM_BP_FAT	GO:0010948~negative regulation of cell cycle process	1	0.423729	1	ENSG00000041515	176	25	11767	2.67432	1	1	100
GOTERM_BP_FAT	GO:0033673~negative regulation of kinase activity	1	0.423729	1	ENSG00000197114	176	87	11767	0.768482	1	1	100
GOTERM_BP_FAT	GO:0003012~muscle system process	1	0.423729	1	ENSG00000068024	176	152	11767	0.439855	1	1	100
GOTERM_BP_FAT	GO:0050982~detection of mechanical stimulus	1	0.423729	1	ENSG00000136997	176	15	11767	4.4572	1	1	100
GOTERM_BP_FAT	GO:0048806~genitalia development	1	0.423729	1	ENSG00000108753	176	23	11767	2.90687	1	1	100
GOTERM_BP_FAT	GO:0042278~purine nucleoside metabolic process	1	0.423729	1	ENSG00000168906	176	28	11767	2.38778	1	1	100
GOTERM_BP_FAT	GO:0051797~regulation of hair follicle development	1	0.423729	1	ENSG00000064300	176	5	11767	13.3716	1	1	100
GOTERM_BP_FAT	GO:0019079~viral genome replication	1	0.423729	1	ENSG00000175029	176	14	11767	4.77557	1	1	100
GOTERM_BP_FAT	GO:0051321~meiotic cell cycle	1	0.423729	1	ENSG00000182185	176	97	11767	0.689257	1	1	100
GOTERM_BP_FAT	GO:0032373~positive regulation of sterol transport	1	0.423729	1	ENSG00000101670	176	7	11767	9.55114	1	1	100
GOTERM_BP_FAT	GO:0048599~oocyte development	1	0.423729	1	ENSG00000118689	176	21	11767	3.18371	1	1	100
GOTERM_BP_FAT	GO:0006625~protein targeting to peroxisome	1	0.423729	1	ENSG00000142655	176	14	11767	4.77557	1	1	100
GOTERM_BP_FAT	GO:0016598~protein arginylation	1	0.423729	1	ENSG00000107669	176	1	11767	66.858	1	1	100
GOTERM_BP_FAT	GO:0048639~positive regulation of developmental growth	1	0.423729	1	ENSG00000179242	176	15	11767	4.4572	1	1	100
GOTERM_BP_FAT	GO:0014887~cardiac muscle adaptation	1	0.423729	1	ENSG00000068024	176	3	11767	22.286	1	1	100
GOTERM_BP_FAT	GO:0007090~regulation of S phase of mitotic cell cycle	1	0.423729	1	ENSG00000041515	176	16	11767	4.17862	1	1	100
GOTERM_BP_FAT	GO:0031575~G1/S transition checkpoint	1	0.423729	1	ENSG00000110092	176	16	11767	4.17862	1	1	100
GOTERM_BP_FAT	GO:0019856~pyrimidine base biosynthetic process	1	0.423729	1	ENSG00000102967	176	5	11767	13.3716	1	1	100
GOTERM_BP_FAT	GO:0007156~homophilic cell adhesion	1	0.423729	1	ENSG00000179242	176	104	11767	0.642865	1	1	100
GOTERM_BP_FAT	GO:0051648~vesicle localization	1	0.423729	1	ENSG00000115648	176	37	11767	1.80697	1	1	100
GOTERM_BP_FAT	GO:0006040~amino sugar metabolic process	1	0.423729	1	ENSG00000167080	176	25	11767	2.67432	1	1	100
GOTERM_BP_FAT	GO:0032526~response to retinoic acid	1	0.423729	1	ENSG00000172819	176	30	11767	2.2286	1	1	100
GOTERM_BP_FAT	GO:0007062~sister chromatid cohesion	1	0.423729	1	ENSG00000136982	176	11	11767	6.078	1	1	100
GOTERM_BP_FAT	GO:0031098~stress-activated protein kinase signaling pathway	1	0.423729	1	ENSG00000187871	176	56	11767	1.19389	1	1	100
GOTERM_BP_FAT	GO:0032332~positive regulation of chondrocyte differentiation	1	0.423729	1	ENSG00000005073	176	7	11767	9.55114	1	1	100
GOTERM_BP_FAT	GO:0000819~sister chromatid segregation	1	0.423729	1	ENSG00000136982	176	34	11767	1.96641	1	1	100
GOTERM_BP_FAT	GO:0007249~I-kappaB kinase/NF-kappaB cascade	1	0.423729	1	ENSG00000120889	176	61	11767	1.09603	1	1	100
GOTERM_BP_FAT	GO:0001542~ovulation from ovarian follicle	1	0.423729	1	ENSG00000118689	176	12	11767	5.5715	1	1	100
GOTERM_BP_FAT	GO:0015824~proline transport	1	0.423729	1	ENSG00000123643	176	4	11767	16.7145	1	1	100
GOTERM_BP_FAT	GO:0009749~response to glucose stimulus	1	0.423729	1	ENSG00000108753	176	42	11767	1.59186	1	1	100
GOTERM_BP_FAT	GO:0030005~cellular di-, tri-valent inorganic cation homeostasis	1	0.423729	1	ENSG00000136997	176	194	11767	0.344629	1	1	100
GOTERM_BP_FAT	GO:0051235~maintenance of location	1	0.423729	1	ENSG00000047932	176	60	11767	1.1143	1	1	100
GOTERM_BP_FAT	GO:0048250~mitochondrial iron ion transport	1	0.423729	1	ENSG00000147454	176	1	11767	66.858	1	1	100
GOTERM_BP_FAT	GO:0030330~DNA damage response, signal transduction by p53 class mediator	1	0.423729	1	ENSG00000196586	176	25	11767	2.67432	1	1	100
GOTERM_BP_FAT	GO:0060343~trabecula formation	1	0.423729	1	ENSG00000108821	176	7	11767	9.55114	1	1	100
GOTERM_BP_FAT	GO:0045185~maintenance of protein location	1	0.423729	1	ENSG00000047932	176	46	11767	1.45343	1	1	100
GOTERM_BP_FAT	GO:0034086~maintenance of sister chromatid cohesion	1	0.423729	1	ENSG00000136982	176	3	11767	22.286	1	1	100
GOTERM_BP_FAT	GO:0030953~spindle astral microtubule organization	1	0.423729	1	ENSG00000138162	176	3	11767	22.286	1	1	100
GOTERM_BP_FAT	GO:0030947~regulation of vascular endothelial growth factor receptor signaling pathway	1	0.423729	1	ENSG00000070193	176	9	11767	7.42866	1	1	100
GOTERM_BP_FAT	GO:0060537~muscle tissue development	1	0.423729	1	ENSG00000168899	176	113	11767	0.591663	1	1	100
GOTERM_BP_FAT	GO:0006879~cellular iron ion homeostasis	1	0.423729	1	ENSG00000136997	176	27	11767	2.47622	1	1	100
GOTERM_BP_FAT	GO:0045646~regulation of erythrocyte differentiation	1	0.423729	1	ENSG00000118689	176	18	11767	3.71433	1	1	100
GOTERM_BP_FAT	GO:0007431~salivary gland development	1	0.423729	1	ENSG00000167034	176	12	11767	5.5715	1	1	100
GOTERM_BP_FAT	GO:0045785~positive regulation of cell adhesion	1	0.423729	1	ENSG00000091409	176	53	11767	1.26147	1	1	100
GOTERM_BP_FAT	GO:0045737~positive regulation of cyclin-dependent protein kinase activity	1	0.423729	1	ENSG00000110092	176	8	11767	8.35724	1	1	100
GOTERM_BP_FAT	GO:0009173~pyrimidine ribonucleoside monophosphate metabolic process	1	0.423729	1	ENSG00000102967	176	3	11767	22.286	1	1	100
GOTERM_BP_FAT	GO:0021935~granule cell precursor tangential migration	1	0.423729	1	ENSG00000076356	176	1	11767	66.858	1	1	100
GOTERM_BP_FAT	GO:0034284~response to monosaccharide stimulus	1	0.423729	1	ENSG00000108753	176	43	11767	1.55484	1	1	100
GOTERM_BP_FAT	GO:0010676~positive regulation of cellular carbohydrate metabolic process	1	0.423729	1	ENSG00000185950	176	19	11767	3.51884	1	1	100
GOTERM_BP_FAT	GO:0045056~transcytosis	1	0.423729	1	ENSG00000042832	176	5	11767	13.3716	1	1	100
GOTERM_BP_FAT	GO:0030501~positive regulation of bone mineralization	1	0.423729	1	ENSG00000138696	176	18	11767	3.71433	1	1	100
GOTERM_BP_FAT	GO:0030879~mammary gland development	1	0.423729	1	ENSG00000185950	176	59	11767	1.13319	1	1	100
GOTERM_BP_FAT	GO:0030238~male sex determination	1	0.423729	1	ENSG00000125398	176	11	11767	6.078	1	1	100
GOTERM_BP_FAT	GO:0046324~regulation of glucose import	1	0.423729	1	ENSG00000185950	176	30	11767	2.2286	1	1	100
GOTERM_BP_FAT	GO:0032313~regulation of Rab GTPase activity	1	0.423729	1	ENSG00000011454	176	42	11767	1.59186	1	1	100
GOTERM_BP_FAT	GO:0007492~endoderm development	1	0.423729	1	ENSG00000108753	176	17	11767	3.93282	1	1	100
GOTERM_BP_FAT	GO:0001504~neurotransmitter uptake	1	0.423729	1	ENSG00000146477	176	10	11767	6.6858	1	1	100
GOTERM_BP_FAT	GO:0006302~double-strand break repair	1	0.423729	1	ENSG00000101868	176	61	11767	1.09603	1	1	100
GOTERM_BP_FAT	GO:0010812~negative regulation of cell-substrate adhesion	1	0.423729	1	ENSG00000108821	176	11	11767	6.078	1	1	100
GOTERM_BP_FAT	GO:0010627~regulation of protein kinase cascade	1	0.423729	1	ENSG00000120889	176	223	11767	0.299811	1	1	100
GOTERM_BP_FAT	GO:0048567~ectodermal gut morphogenesis	1	0.423729	1	ENSG00000137166	176	9	11767	7.42866	1	1	100
GOTERM_BP_FAT	GO:0007439~ectodermal gut development	1	0.423729	1	ENSG00000137166	176	9	11767	7.42866	1	1	100
GOTERM_BP_FAT	GO:0016125~sterol metabolic process	1	0.423729	1	ENSG00000001626	176	99	11767	0.675333	1	1	100
GOTERM_BP_FAT	GO:0006493~protein amino acid O-linked glycosylation	1	0.423729	1	ENSG00000000419	176	25	11767	2.67432	1	1	100
GOTERM_BP_FAT	GO:0006656~phosphatidylcholine biosynthetic process	1	0.423729	1	ENSG00000102230	176	11	11767	6.078	1	1	100
GOTERM_BP_FAT	GO:0051384~response to glucocorticoid stimulus	1	0.423729	1	ENSG00000110092	176	70	11767	0.955114	1	1	100
GOTERM_BP_FAT	GO:0006732~coenzyme metabolic process	1	0.423729	1	ENSG00000124217	176	147	11767	0.454816	1	1	100
GOTERM_BP_FAT	GO:0043523~regulation of neuron apoptosis	1	0.423729	1	ENSG00000101126	176	85	11767	0.786564	1	1	100
GOTERM_BP_FAT	GO:0033043~regulation of organelle organization	1	0.423729	1	ENSG00000136997	176	202	11767	0.33098	1	1	100
GOTERM_BP_FAT	GO:0006393~termination of mitochondrial transcription	1	0.423729	1	ENSG00000127989	176	1	11767	66.858	1	1	100
GOTERM_BP_FAT	GO:0070555~response to interleukin-1	1	0.423729	1	ENSG00000068024	176	17	11767	3.93282	1	1	100
GOTERM_BP_FAT	GO:0006596~polyamine biosynthetic process	1	0.423729	1	ENSG00000115758	176	8	11767	8.35724	1	1	100
GOTERM_BP_FAT	GO:0051057~positive regulation of small GTPase mediated signal transduction	1	0.423729	1	ENSG00000189056	176	17	11767	3.93282	1	1	100
GOTERM_BP_FAT	GO:0035269~protein amino acid O-linked mannosylation	1	0.423729	1	ENSG00000000419	176	3	11767	22.286	1	1	100
GOTERM_BP_FAT	GO:0042246~tissue regeneration	1	0.423729	1	ENSG00000070193	176	27	11767	2.47622	1	1	100
GOTERM_BP_FAT	GO:0033189~response to vitamin A	1	0.423729	1	ENSG00000172819	176	39	11767	1.71431	1	1	100
GOTERM_BP_FAT	GO:0030949~positive regulation of vascular endothelial growth factor receptor signaling pathway	1	0.423729	1	ENSG00000070193	176	7	11767	9.55114	1	1	100
GOTERM_BP_FAT	GO:0009855~determination of bilateral symmetry	1	0.423729	1	ENSG00000070193	176	41	11767	1.63068	1	1	100
GOTERM_BP_FAT	GO:0050900~leukocyte migration	1	0.423729	1	ENSG00000091409	176	50	11767	1.33716	1	1	100
GOTERM_BP_FAT	GO:0051327~M phase of meiotic cell cycle	1	0.423729	1	ENSG00000182185	176	95	11767	0.703768	1	1	100
GOTERM_BP_FAT	GO:0006273~lagging strand elongation	1	0.423729	1	ENSG00000101868	176	3	11767	22.286	1	1	100
GOTERM_BP_FAT	GO:0031293~membrane protein intracellular domain proteolysis	1	0.423729	1	ENSG00000064300	176	11	11767	6.078	1	1	100
GOTERM_BP_FAT	GO:0006821~chloride transport	1	0.423729	1	ENSG00000001626	176	59	11767	1.13319	1	1	100
GOTERM_BP_FAT	GO:0048638~regulation of developmental growth	1	0.423729	1	ENSG00000179242	176	44	11767	1.5195	1	1	100
GOTERM_BP_FAT	GO:0044058~regulation of digestive system process	1	0.423729	1	ENSG00000176358	176	8	11767	8.35724	1	1	100
GOTERM_BP_FAT	GO:0032374~regulation of cholesterol transport	1	0.423729	1	ENSG00000101670	176	17	11767	3.93282	1	1	100
GOTERM_BP_FAT	GO:0007585~respiratory gaseous exchange	1	0.423729	1	ENSG00000001626	176	33	11767	2.026	1	1	100
GOTERM_BP_FAT	GO:0006206~pyrimidine base metabolic process	1	0.423729	1	ENSG00000102967	176	10	11767	6.6858	1	1	100
GOTERM_BP_FAT	GO:0008637~apoptotic mitochondrial changes	1	0.423729	1	ENSG00000136997	176	29	11767	2.30545	1	1	100
GOTERM_BP_FAT	GO:0019438~aromatic compound biosynthetic process	1	0.423729	1	ENSG00000124217	176	17	11767	3.93282	1	1	100
GOTERM_BP_FAT	GO:0030177~positive regulation of Wnt receptor signaling pathway	1	0.423729	1	ENSG00000070193	176	7	11767	9.55114	1	1	100
GOTERM_BP_FAT	GO:0043279~response to alkaloid	1	0.423729	1	ENSG00000136997	176	49	11767	1.36445	1	1	100
GOTERM_BP_FAT	GO:0030968~endoplasmic reticulum unfolded protein response	1	0.423729	1	ENSG00000110092	176	20	11767	3.3429	1	1	100
GOTERM_BP_FAT	GO:0045637~regulation of myeloid cell differentiation	1	0.423729	1	ENSG00000118689	176	64	11767	1.04466	1	1	100
GOTERM_BP_FAT	GO:0017148~negative regulation of translation	1	0.423729	1	ENSG00000159217	176	32	11767	2.08931	1	1	100
GOTERM_BP_FAT	GO:0032483~regulation of Rab protein signal transduction	1	0.423729	1	ENSG00000011454	176	42	11767	1.59186	1	1	100
GOTERM_BP_FAT	GO:0045176~apical protein localization	1	0.423729	1	ENSG00000047932	176	9	11767	7.42866	1	1	100
GOTERM_BP_FAT	GO:0018992~germ-line sex determination	1	0.423729	1	ENSG00000125398	176	1	11767	66.858	1	1	100
GOTERM_BP_FAT	GO:0000097~sulfur amino acid biosynthetic process	1	0.423729	1	ENSG00000168906	176	15	11767	4.4572	1	1	100
GOTERM_BP_FAT	GO:0003007~heart morphogenesis	1	0.423729	1	ENSG00000101752	176	66	11767	1.013	1	1	100
GOTERM_BP_FAT	GO:0051789~response to protein stimulus	1	0.423729	1	ENSG00000110092	176	97	11767	0.689257	1	1	100
GOTERM_BP_FAT	GO:0006595~polyamine metabolic process	1	0.423729	1	ENSG00000115758	176	11	11767	6.078	1	1	100
GOTERM_BP_FAT	GO:0032885~regulation of polysaccharide biosynthetic process	1	0.423729	1	ENSG00000185950	176	14	11767	4.77557	1	1	100
GOTERM_BP_FAT	GO:0006777~Mo-molybdopterin cofactor biosynthetic process	1	0.423729	1	ENSG00000124217	176	6	11767	11.143	1	1	100
GOTERM_BP_FAT	GO:0006400~tRNA modification	1	0.423729	1	ENSG00000124217	176	16	11767	4.17862	1	1	100
GOTERM_BP_FAT	GO:0015804~neutral amino acid transport	1	0.423729	1	ENSG00000123643	176	19	11767	3.51884	1	1	100
GOTERM_BP_FAT	GO:0006413~translational initiation	1	0.423729	1	ENSG00000177369	176	44	11767	1.5195	1	1	100
GOTERM_BP_FAT	GO:0019100~male germ-line sex determination	1	0.423729	1	ENSG00000125398	176	1	11767	66.858	1	1	100
GOTERM_BP_FAT	GO:0007175~negative regulation of epidermal growth factor receptor activity	1	0.423729	1	ENSG00000197114	176	4	11767	16.7145	1	1	100
GOTERM_BP_FAT	GO:0060322~head development	1	0.423729	1	ENSG00000108821	176	14	11767	4.77557	1	1	100
GOTERM_BP_FAT	GO:0050926~regulation of positive chemotaxis	1	0.423729	1	ENSG00000070193	176	15	11767	4.4572	1	1	100
GOTERM_BP_FAT	GO:0045639~positive regulation of myeloid cell differentiation	1	0.423729	1	ENSG00000118689	176	30	11767	2.2286	1	1	100
GOTERM_BP_FAT	GO:0045661~regulation of myoblast differentiation	1	0.423729	1	ENSG00000140836	176	11	11767	6.078	1	1	100
GOTERM_BP_FAT	GO:0043002~negative regulation of Golgi to plasma membrane CFTR protein transport	1	0.423729	1	ENSG00000047932	176	1	11767	66.858	1	1	100
GOTERM_BP_FAT	GO:0048066~pigmentation during development	1	0.423729	1	ENSG00000115648	176	24	11767	2.78575	1	1	100
GOTERM_BP_FAT	GO:0033555~multicellular organismal response to stress	1	0.423729	1	ENSG00000189056	176	34	11767	1.96641	1	1	100
GOTERM_BP_FAT	GO:0048712~negative regulation of astrocyte differentiation	1	0.423729	1	ENSG00000172201	176	4	11767	16.7145	1	1	100
GOTERM_BP_FAT	GO:0006364~rRNA processing	1	0.423729	1	ENSG00000179409	176	89	11767	0.751213	1	1	100
GOTERM_BP_FAT	GO:0007368~determination of left/right symmetry	1	0.423729	1	ENSG00000070193	176	40	11767	1.67145	1	1	100
GOTERM_BP_FAT	GO:0001657~ureteric bud development	1	0.423729	1	ENSG00000005073	176	31	11767	2.15671	1	1	100
GOTERM_BP_FAT	GO:0070168~negative regulation of biomineral formation	1	0.423729	1	ENSG00000125398	176	4	11767	16.7145	1	1	100
GOTERM_BP_FAT	GO:0010907~positive regulation of glucose metabolic process	1	0.423729	1	ENSG00000185950	176	19	11767	3.51884	1	1	100
GOTERM_BP_FAT	GO:0006694~steroid biosynthetic process	1	0.423729	1	ENSG00000001626	176	74	11767	0.903486	1	1	100
GOTERM_BP_FAT	GO:0001974~blood vessel remodeling	1	0.423729	1	ENSG00000070193	176	20	11767	3.3429	1	1	100
GOTERM_BP_FAT	GO:0001764~neuron migration	1	0.423729	1	ENSG00000189056	176	59	11767	1.13319	1	1	100
GOTERM_BP_FAT	GO:0022027~interkinetic nuclear migration	1	0.423729	1	ENSG00000138162	176	3	11767	22.286	1	1	100
GOTERM_BP_FAT	GO:0051647~nucleus localization	1	0.423729	1	ENSG00000138162	176	10	11767	6.6858	1	1	100
GOTERM_BP_FAT	GO:0032204~regulation of telomere maintenance	1	0.423729	1	ENSG00000136997	176	12	11767	5.5715	1	1	100
GOTERM_BP_FAT	GO:0008347~glial cell migration	1	0.423729	1	ENSG00000102606	176	7	11767	9.55114	1	1	100
GOTERM_BP_FAT	GO:0022409~positive regulation of cell-cell adhesion	1	0.423729	1	ENSG00000091409	176	9	11767	7.42866	1	1	100
GOTERM_BP_FAT	GO:0006695~cholesterol biosynthetic process	1	0.423729	1	ENSG00000001626	176	26	11767	2.57146	1	1	100
GOTERM_BP_FAT	GO:0045765~regulation of angiogenesis	1	0.423729	1	ENSG00000142515	176	62	11767	1.07835	1	1	100
GOTERM_BP_FAT	GO:0042439~ethanolamine and derivative metabolic process	1	0.423729	1	ENSG00000102230	176	29	11767	2.30545	1	1	100
GOTERM_BP_FAT	GO:0021846~cell proliferation in forebrain	1	0.423729	1	ENSG00000138162	176	6	11767	11.143	1	1	100
GOTERM_BP_FAT	GO:0046878~positive regulation of saliva secretion	1	0.423729	1	ENSG00000176358	176	1	11767	66.858	1	1	100
GOTERM_BP_FAT	GO:0060323~head morphogenesis	1	0.423729	1	ENSG00000108821	176	11	11767	6.078	1	1	100
GOTERM_BP_FAT	GO:0022408~negative regulation of cell-cell adhesion	1	0.423729	1	ENSG00000167080	176	8	11767	8.35724	1	1	100
GOTERM_BP_FAT	GO:0070141~response to UV-A	1	0.423729	1	ENSG00000110092	176	3	11767	22.286	1	1	100
GOTERM_BP_FAT	GO:0032269~negative regulation of cellular protein metabolic process	1	0.423729	1	ENSG00000159217	176	168	11767	0.397964	1	1	100
GOTERM_BP_FAT	GO:0045663~positive regulation of myoblast differentiation	1	0.423729	1	ENSG00000140836	176	5	11767	13.3716	1	1	100
GOTERM_BP_FAT	GO:0031018~endocrine pancreas development	1	0.423729	1	ENSG00000108753	176	16	11767	4.17862	1	1	100
GOTERM_BP_FAT	GO:0018205~peptidyl-lysine modification	1	0.423729	1	ENSG00000068024	176	16	11767	4.17862	1	1	100
GOTERM_BP_FAT	GO:0050808~synapse organization	1	0.423729	1	ENSG00000196586	176	59	11767	1.13319	1	1	100
GOTERM_BP_FAT	GO:0018106~peptidyl-histidine phosphorylation	1	0.423729	1	ENSG00000005882	176	5	11767	13.3716	1	1	100
GOTERM_BP_FAT	GO:0014033~neural crest cell differentiation	1	0.423729	1	ENSG00000125398	176	27	11767	2.47622	1	1	100
GOTERM_BP_FAT	GO:0007044~cell-substrate junction assembly	1	0.423729	1	ENSG00000091409	176	21	11767	3.18371	1	1	100
GOTERM_BP_FAT	GO:0032400~melanosome localization	1	0.423729	1	ENSG00000115648	176	13	11767	5.14292	1	1	100
GOTERM_BP_FAT	GO:0050801~ion homeostasis	1	0.423729	1	ENSG00000136997	176	367	11767	0.182174	1	1	100
GOTERM_BP_FAT	GO:0051651~maintenance of location in cell	1	0.423729	1	ENSG00000047932	176	48	11767	1.39287	1	1	100
GOTERM_BP_FAT	GO:0007530~sex determination	1	0.423729	1	ENSG00000125398	176	17	11767	3.93282	1	1	100
GOTERM_BP_FAT	GO:0043241~protein complex disassembly	1	0.423729	1	ENSG00000127989	176	16	11767	4.17862	1	1	100
GOTERM_BP_FAT	GO:0043122~regulation of I-kappaB kinase/NF-kappaB cascade	1	0.423729	1	ENSG00000120889	176	102	11767	0.65547	1	1	100
GOTERM_BP_FAT	GO:0050906~detection of stimulus involved in sensory perception	1	0.423729	1	ENSG00000136997	176	28	11767	2.38778	1	1	100
GOTERM_BP_FAT	GO:0014854~response to inactivity	1	0.423729	1	ENSG00000068024	176	1	11767	66.858	1	1	100
GOTERM_BP_FAT	GO:0016322~neuron remodeling	1	0.423729	1	ENSG00000006607	176	5	11767	13.3716	1	1	100
GOTERM_BP_FAT	GO:0030048~actin filament-based movement	1	0.423729	1	ENSG00000196586	176	20	11767	3.3429	1	1	100
GOTERM_BP_FAT	GO:0051154~negative regulation of striated muscle cell differentiation	1	0.423729	1	ENSG00000068024	176	6	11767	11.143	1	1	100
GOTERM_BP_FAT	GO:0032103~positive regulation of response to external stimulus	1	0.423729	1	ENSG00000070193	176	57	11767	1.17295	1	1	100
GOTERM_BP_FAT	GO:0030705~cytoskeleton-dependent intracellular transport	1	0.423729	1	ENSG00000196586	176	49	11767	1.36445	1	1	100
GOTERM_BP_FAT	GO:0014032~neural crest cell development	1	0.423729	1	ENSG00000125398	176	27	11767	2.47622	1	1	100
GOTERM_BP_FAT	GO:0060037~pharyngeal system development	1	0.423729	1	ENSG00000167034	176	7	11767	9.55114	1	1	100
GOTERM_BP_FAT	GO:0045778~positive regulation of ossification	1	0.423729	1	ENSG00000138696	176	22	11767	3.039	1	1	100
GOTERM_BP_FAT	GO:0015917~aminophospholipid transport	1	0.423729	1	ENSG00000166377	176	3	11767	22.286	1	1	100
GOTERM_BP_FAT	GO:0045454~cell redox homeostasis	1	0.423729	1	ENSG00000167693	176	61	11767	1.09603	1	1	100
GOTERM_BP_FAT	GO:0006029~proteoglycan metabolic process	1	0.423729	1	ENSG00000181523	176	42	11767	1.59186	1	1	100
GOTERM_BP_FAT	GO:0051017~actin filament bundle formation	1	0.423729	1	ENSG00000111859	176	20	11767	3.3429	1	1	100
GOTERM_BP_FAT	GO:0007265~Ras protein signal transduction	1	0.423729	1	ENSG00000006607	176	102	11767	0.65547	1	1	100
GOTERM_BP_FAT	GO:0032507~maintenance of protein location in cell	1	0.423729	1	ENSG00000047932	176	41	11767	1.63068	1	1	100
GOTERM_BP_FAT	GO:0048165~fused antrum stage, oogenesis	1	0.423729	1	ENSG00000138696	176	2	11767	33.429	1	1	100
GOTERM_BP_FAT	GO:0022605~oogenesis stage	1	0.423729	1	ENSG00000138696	176	2	11767	33.429	1	1	100
GOTERM_BP_FAT	GO:0050677~positive regulation of urothelial cell proliferation	1	0.423729	1	ENSG00000070193	176	2	11767	33.429	1	1	100
GOTERM_BP_FAT	GO:0009266~response to temperature stimulus	1	0.423729	1	ENSG00000064300	176	74	11767	0.903486	1	1	100
GOTERM_BP_FAT	GO:0001817~regulation of cytokine production	1	0.423729	1	ENSG00000159217	176	165	11767	0.4052	1	1	100
GOTERM_BP_FAT	GO:0048255~mRNA stabilization	1	0.423729	1	ENSG00000159217	176	15	11767	4.4572	1	1	100
GOTERM_BP_FAT	GO:0060675~ureteric bud morphogenesis	1	0.423729	1	ENSG00000005073	176	20	11767	3.3429	1	1	100
GOTERM_BP_FAT	GO:0050795~regulation of behavior	1	0.423729	1	ENSG00000070193	176	40	11767	1.67145	1	1	100
GOTERM_BP_FAT	GO:0007017~microtubule-based process	1	0.423729	1	ENSG00000138162	176	238	11767	0.280916	1	1	100
GOTERM_BP_FAT	GO:0048520~positive regulation of behavior	1	0.423729	1	ENSG00000070193	176	29	11767	2.30545	1	1	100
GOTERM_BP_FAT	GO:0031214~biomineral formation	1	0.423729	1	ENSG00000108821	176	32	11767	2.08931	1	1	100
GOTERM_BP_FAT	GO:0048706~embryonic skeletal system development	1	0.423729	1	ENSG00000108821	176	69	11767	0.968956	1	1	100
GOTERM_BP_FAT	GO:0050994~regulation of lipid catabolic process	1	0.423729	1	ENSG00000185950	176	21	11767	3.18371	1	1	100
GOTERM_BP_FAT	GO:0010740~positive regulation of protein kinase cascade	1	0.423729	1	ENSG00000120889	176	151	11767	0.442768	1	1	100
GOTERM_BP_FAT	GO:0007623~circadian rhythm	1	0.423729	1	ENSG00000168906	176	41	11767	1.63068	1	1	100
GOTERM_BP_FAT	GO:0006207~'de novo' pyrimidine base biosynthetic process	1	0.423729	1	ENSG00000102967	176	5	11767	13.3716	1	1	100
GOTERM_BP_FAT	GO:0045686~negative regulation of glial cell differentiation	1	0.423729	1	ENSG00000172201	176	11	11767	6.078	1	1	100
GOTERM_BP_FAT	GO:0015674~di-, tri-valent inorganic cation transport	1	0.423729	1	ENSG00000147454	176	164	11767	0.40767	1	1	100
GOTERM_BP_FAT	GO:0006261~DNA-dependent DNA replication	1	0.423729	1	ENSG00000101868	176	56	11767	1.19389	1	1	100
GOTERM_BP_FAT	GO:0018406~protein amino acid C-linked glycosylation via 2'-alpha-mannosyl-L-tryptophan	1	0.423729	1	ENSG00000000419	176	3	11767	22.286	1	1	100
GOTERM_BP_FAT	GO:0006913~nucleocytoplasmic transport	1	0.423729	1	ENSG00000070193	176	150	11767	0.44572	1	1	100
GOTERM_BP_FAT	GO:0010986~positive regulation of lipoprotein particle clearance	1	0.423729	1	ENSG00000101670	176	1	11767	66.858	1	1	100
GOTERM_BP_FAT	GO:0031424~keratinization	1	0.423729	1	ENSG00000172867	176	13	11767	5.14292	1	1	100
GOTERM_BP_FAT	GO:0042997~negative regulation of Golgi to plasma membrane protein transport	1	0.423729	1	ENSG00000047932	176	1	11767	66.858	1	1	100
GOTERM_BP_FAT	GO:0034369~plasma lipoprotein particle remodeling	1	0.423729	1	ENSG00000101670	176	17	11767	3.93282	1	1	100
GOTERM_BP_FAT	GO:0043500~muscle adaptation	1	0.423729	1	ENSG00000068024	176	12	11767	5.5715	1	1	100
GOTERM_BP_FAT	GO:0050674~urothelial cell proliferation	1	0.423729	1	ENSG00000070193	176	1	11767	66.858	1	1	100
GOTERM_BP_FAT	GO:0043524~negative regulation of neuron apoptosis	1	0.423729	1	ENSG00000101126	176	51	11767	1.31094	1	1	100
GOTERM_BP_FAT	GO:0010039~response to iron ion	1	0.423729	1	ENSG00000110092	176	12	11767	5.5715	1	1	100
GOTERM_BP_FAT	GO:0007589~body fluid secretion	1	0.423729	1	ENSG00000112499	176	22	11767	3.039	1	1	100
GOTERM_BP_FAT	GO:0042551~neuron maturation	1	0.423729	1	ENSG00000006607	176	17	11767	3.93282	1	1	100
GOTERM_BP_FAT	GO:0000731~DNA synthesis during DNA repair	1	0.423729	1	ENSG00000101868	176	9	11767	7.42866	1	1	100
GOTERM_BP_FAT	GO:0001505~regulation of neurotransmitter levels	1	0.423729	1	ENSG00000146477	176	65	11767	1.02858	1	1	100
GOTERM_BP_FAT	GO:0018103~protein amino acid C-linked glycosylation	1	0.423729	1	ENSG00000000419	176	3	11767	22.286	1	1	100
GOTERM_BP_FAT	GO:0015992~proton transport	1	0.423729	1	ENSG00000123643	176	55	11767	1.2156	1	1	100
GOTERM_BP_FAT	GO:0003018~vascular process in circulatory system	1	0.423729	1	ENSG00000001626	176	47	11767	1.42251	1	1	100
GOTERM_BP_FAT	GO:0060041~retina development in camera-type eye	1	0.423729	1	ENSG00000138696	176	31	11767	2.15671	1	1	100
GOTERM_BP_FAT	GO:0032496~response to lipopolysaccharide	1	0.423729	1	ENSG00000042832	176	71	11767	0.941661	1	1	100
GOTERM_BP_FAT	GO:0042488~positive regulation of odontogenesis of dentine-containing tooth	1	0.423729	1	ENSG00000064300	176	2	11767	33.429	1	1	100
GOTERM_BP_FAT	GO:0032964~collagen biosynthetic process	1	0.423729	1	ENSG00000108821	176	5	11767	13.3716	1	1	100
GOTERM_BP_FAT	GO:0016558~protein import into peroxisome matrix	1	0.423729	1	ENSG00000142655	176	10	11767	6.6858	1	1	100
GOTERM_BP_FAT	GO:0032870~cellular response to hormone stimulus	1	0.423729	1	ENSG00000185950	176	125	11767	0.534864	1	1	100
GOTERM_BP_FAT	GO:0050931~pigment cell differentiation	1	0.423729	1	ENSG00000115648	176	14	11767	4.77557	1	1	100
GOTERM_BP_FAT	GO:0016048~detection of temperature stimulus	1	0.423729	1	ENSG00000064300	176	3	11767	22.286	1	1	100
GOTERM_BP_FAT	GO:0032984~macromolecular complex disassembly	1	0.423729	1	ENSG00000127989	176	24	11767	2.78575	1	1	100
GOTERM_BP_FAT	GO:0030031~cell projection assembly	1	0.423729	1	ENSG00000091409	176	83	11767	0.805518	1	1	100
GOTERM_BP_FAT	GO:0032312~regulation of ARF GTPase activity	1	0.423729	1	ENSG00000153317	176	27	11767	2.47622	1	1	100
GOTERM_BP_FAT	GO:0035137~hindlimb morphogenesis	1	0.423729	1	ENSG00000172819	176	23	11767	2.90687	1	1	100
GOTERM_BP_FAT	GO:0051169~nuclear transport	1	0.423729	1	ENSG00000070193	176	152	11767	0.439855	1	1	100
GOTERM_BP_FAT	GO:0010610~regulation of mRNA stability involved in response to stress	1	0.423729	1	ENSG00000159217	176	1	11767	66.858	1	1	100
GOTERM_BP_FAT	GO:0030098~lymphocyte differentiation	1	0.423729	1	ENSG00000068024	176	96	11767	0.696437	1	1	100
GOTERM_BP_FAT	GO:0032886~regulation of microtubule-based process	1	0.423729	1	ENSG00000138162	176	49	11767	1.36445	1	1	100
GOTERM_BP_FAT	GO:0001934~positive regulation of protein amino acid phosphorylation	1	0.423729	1	ENSG00000110092	176	74	11767	0.903486	1	1	100
GOTERM_BP_FAT	GO:0042403~thyroid hormone metabolic process	1	0.423729	1	ENSG00000189056	176	11	11767	6.078	1	1	100
GOTERM_BP_FAT	GO:0010746~regulation of plasma membrane long-chain fatty acid transport	1	0.423729	1	ENSG00000185950	176	4	11767	16.7145	1	1	100
GOTERM_BP_FAT	GO:0030198~extracellular matrix organization	1	0.423729	1	ENSG00000108821	176	97	11767	0.689257	1	1	100
GOTERM_BP_FAT	GO:0046321~positive regulation of fatty acid oxidation	1	0.423729	1	ENSG00000185950	176	7	11767	9.55114	1	1	100
GOTERM_BP_FAT	GO:0000096~sulfur amino acid metabolic process	1	0.423729	1	ENSG00000168906	176	22	11767	3.039	1	1	100
GOTERM_BP_FAT	GO:0035268~protein amino acid mannosylation	1	0.423729	1	ENSG00000000419	176	3	11767	22.286	1	1	100
GOTERM_BP_FAT	GO:0015844~monoamine transport	1	0.423729	1	ENSG00000146477	176	16	11767	4.17862	1	1	100
GOTERM_BP_FAT	GO:0045884~regulation of survival gene product expression	1	0.423729	1	ENSG00000136997	176	18	11767	3.71433	1	1	100
GOTERM_BP_FAT	GO:0014894~response to denervation involved in regulation of muscle adaptation	1	0.423729	1	ENSG00000068024	176	1	11767	66.858	1	1	100
GOTERM_BP_FAT	GO:0006818~hydrogen transport	1	0.423729	1	ENSG00000123643	176	57	11767	1.17295	1	1	100
GOTERM_BP_FAT	GO:0006606~protein import into nucleus	1	0.423729	1	ENSG00000070193	176	82	11767	0.815341	1	1	100
GOTERM_BP_FAT	GO:0009130~pyrimidine nucleoside monophosphate biosynthetic process	1	0.423729	1	ENSG00000102967	176	4	11767	16.7145	1	1	100
GOTERM_BP_FAT	GO:0010564~regulation of cell cycle process	1	0.423729	1	ENSG00000041515	176	108	11767	0.619055	1	1	100
GOTERM_BP_FAT	GO:0043123~positive regulation of I-kappaB kinase/NF-kappaB cascade	1	0.423729	1	ENSG00000120889	176	92	11767	0.726717	1	1	100
GOTERM_BP_FAT	GO:0051546~keratinocyte migration	1	0.423729	1	ENSG00000172867	176	2	11767	33.429	1	1	100
GOTERM_BP_FAT	GO:0032808~lacrimal gland development	1	0.423729	1	ENSG00000070193	176	3	11767	22.286	1	1	100
GOTERM_BP_FAT	GO:0051220~cytoplasmic sequestering of protein	1	0.423729	1	ENSG00000047932	176	14	11767	4.77557	1	1	100
GOTERM_BP_FAT	GO:0001825~blastocyst formation	1	0.423729	1	ENSG00000108753	176	19	11767	3.51884	1	1	100
GOTERM_BP_FAT	GO:0009156~ribonucleoside monophosphate biosynthetic process	1	0.423729	1	ENSG00000102967	176	21	11767	3.18371	1	1	100
GOTERM_BP_FAT	GO:0016032~viral reproduction	1	0.423729	1	ENSG00000175029	176	63	11767	1.06124	1	1	100
GOTERM_BP_FAT	GO:0002097~tRNA wobble base modification	1	0.423729	1	ENSG00000124217	176	4	11767	16.7145	1	1	100
GOTERM_BP_FAT	GO:0007030~Golgi organization	1	0.423729	1	ENSG00000184743	176	21	11767	3.18371	1	1	100
GOTERM_BP_FAT	GO:0034504~protein localization in nucleus	1	0.423729	1	ENSG00000070193	176	90	11767	0.742866	1	1	100
GOTERM_BP_FAT	GO:0051091~positive regulation of transcription factor activity	1	0.423729	1	ENSG00000068024	176	57	11767	1.17295	1	1	100
GOTERM_BP_FAT	GO:0000226~microtubule cytoskeleton organization	1	0.423729	1	ENSG00000138162	176	140	11767	0.477557	1	1	100
GOTERM_BP_FAT	GO:0030318~melanocyte differentiation	1	0.423729	1	ENSG00000115648	176	13	11767	5.14292	1	1	100
GOTERM_BP_FAT	GO:0006929~substrate-bound cell migration	1	0.423729	1	ENSG00000137809	176	11	11767	6.078	1	1	100
GOTERM_BP_FAT	GO:0009174~pyrimidine ribonucleoside monophosphate biosynthetic process	1	0.423729	1	ENSG00000102967	176	3	11767	22.286	1	1	100
GOTERM_BP_FAT	GO:0048146~positive regulation of fibroblast proliferation	1	0.423729	1	ENSG00000064300	176	25	11767	2.67432	1	1	100
GOTERM_BP_FAT	GO:0009108~coenzyme biosynthetic process	1	0.423729	1	ENSG00000124217	176	66	11767	1.013	1	1	100
GOTERM_BP_FAT	GO:0006220~pyrimidine nucleotide metabolic process	1	0.423729	1	ENSG00000102967	176	34	11767	1.96641	1	1	100
GOTERM_BP_FAT	GO:0045930~negative regulation of mitotic cell cycle	1	0.423729	1	ENSG00000041515	176	22	11767	3.039	1	1	100
GOTERM_BP_FAT	GO:0030279~negative regulation of ossification	1	0.423729	1	ENSG00000125398	176	11	11767	6.078	1	1	100
GOTERM_BP_FAT	GO:0055080~cation homeostasis	1	0.423729	1	ENSG00000136997	176	251	11767	0.266366	1	1	100
GOTERM_BP_FAT	GO:0042558~pteridine and derivative metabolic process	1	0.423729	1	ENSG00000124217	176	22	11767	3.039	1	1	100
GOTERM_BP_FAT	GO:0048710~regulation of astrocyte differentiation	1	0.423729	1	ENSG00000172201	176	6	11767	11.143	1	1	100
GOTERM_BP_FAT	GO:0021766~hippocampus development	1	0.423729	1	ENSG00000172201	176	20	11767	3.3429	1	1	100
GOTERM_BP_FAT	GO:0031998~regulation of fatty acid beta-oxidation	1	0.423729	1	ENSG00000185950	176	7	11767	9.55114	1	1	100
GOTERM_BP_FAT	GO:0014877~response to muscle inactivity involved in regulation of muscle adaptation	1	0.423729	1	ENSG00000068024	176	1	11767	66.858	1	1	100
GOTERM_BP_FAT	GO:0001836~release of cytochrome c from mitochondria	1	0.423729	1	ENSG00000136997	176	20	11767	3.3429	1	1	100
GOTERM_BP_FAT	GO:0043086~negative regulation of catalytic activity	1	0.423729	1	ENSG00000197114	176	262	11767	0.255183	1	1	100
GOTERM_BP_FAT	GO:0007126~meiosis	1	0.423729	1	ENSG00000182185	176	95	11767	0.703768	1	1	100
GOTERM_BP_FAT	GO:0055092~sterol homeostasis	1	0.423729	1	ENSG00000101670	176	33	11767	2.026	1	1	100
GOTERM_BP_FAT	GO:0034983~peptidyl-lysine deacetylation	1	0.423729	1	ENSG00000068024	176	4	11767	16.7145	1	1	100
GOTERM_BP_FAT	GO:0050804~regulation of synaptic transmission	1	0.423729	1	ENSG00000196586	176	124	11767	0.539177	1	1	100
GOTERM_BP_FAT	GO:0006399~tRNA metabolic process	1	0.423729	1	ENSG00000124217	176	110	11767	0.6078	1	1	100
GOTERM_BP_FAT	GO:0046128~purine ribonucleoside metabolic process	1	0.423729	1	ENSG00000168906	176	28	11767	2.38778	1	1	100
GOTERM_BP_FAT	GO:0034984~cellular response to DNA damage stimulus	1	0.423729	1	ENSG00000110092	176	8	11767	8.35724	1	1	100
GOTERM_BP_FAT	GO:0050920~regulation of chemotaxis	1	0.423729	1	ENSG00000070193	176	27	11767	2.47622	1	1	100
GOTERM_BP_FAT	GO:0045685~regulation of glial cell differentiation	1	0.423729	1	ENSG00000172201	176	20	11767	3.3429	1	1	100
GOTERM_BP_FAT	GO:0007218~neuropeptide signaling pathway	1	0.423729	1	ENSG00000187008	176	81	11767	0.825407	1	1	100
GOTERM_BP_FAT	GO:0001649~osteoblast differentiation	1	0.423729	1	ENSG00000108821	176	39	11767	1.71431	1	1	100
GOTERM_BP_FAT	GO:0007217~tachykinin receptor signaling pathway	1	0.423729	1	ENSG00000176358	176	8	11767	8.35724	1	1	100
GOTERM_BP_FAT	GO:0032324~molybdopterin cofactor biosynthetic process	1	0.423729	1	ENSG00000124217	176	6	11767	11.143	1	1	100
GOTERM_BP_FAT	GO:0010551~regulation of specific transcription from RNA polymerase II promoter	1	0.423729	1	ENSG00000068024	176	89	11767	0.751213	1	1	100
GOTERM_BP_FAT	GO:0000387~spliceosomal snRNP biogenesis	1	0.423729	1	ENSG00000179409	176	28	11767	2.38778	1	1	100
GOTERM_BP_FAT	GO:0015816~glycine transport	1	0.423729	1	ENSG00000123643	176	4	11767	16.7145	1	1	100
GOTERM_BP_FAT	GO:0010212~response to ionizing radiation	1	0.423729	1	ENSG00000110092	176	56	11767	1.19389	1	1	100
GOTERM_BP_FAT	GO:0006730~one-carbon metabolic process	1	0.423729	1	ENSG00000168906	176	105	11767	0.636742	1	1	100
GOTERM_BP_FAT	GO:0030216~keratinocyte differentiation	1	0.423729	1	ENSG00000172867	176	33	11767	2.026	1	1	100
GOTERM_BP_FAT	GO:0060456~positive regulation of digestive system process	1	0.423729	1	ENSG00000176358	176	2	11767	33.429	1	1	100
GOTERM_BP_FAT	GO:0032000~positive regulation of fatty acid beta-oxidation	1	0.423729	1	ENSG00000185950	176	4	11767	16.7145	1	1	100
GOTERM_BP_FAT	GO:0014888~striated muscle adaptation	1	0.423729	1	ENSG00000068024	176	7	11767	9.55114	1	1	100
GOTERM_BP_FAT	GO:0014896~muscle hypertrophy	1	0.423729	1	ENSG00000068024	176	5	11767	13.3716	1	1	100
GOTERM_BP_FAT	GO:0051223~regulation of protein transport	1	0.423729	1	ENSG00000047932	176	104	11767	0.642865	1	1	100
GOTERM_BP_FAT	GO:0010983~positive regulation of high-density lipoprotein particle clearance	1	0.423729	1	ENSG00000101670	176	1	11767	66.858	1	1	100
GOTERM_BP_FAT	GO:0001558~regulation of cell growth	1	0.423729	1	ENSG00000179242	176	183	11767	0.365344	1	1	100
GOTERM_BP_FAT	GO:0000245~spliceosome assembly	1	0.423729	1	ENSG00000168883	176	32	11767	2.08931	1	1	100
GOTERM_BP_FAT	GO:0001958~endochondral ossification	1	0.423729	1	ENSG00000108821	176	11	11767	6.078	1	1	100
GOTERM_BP_FAT	GO:0000060~protein import into nucleus, translocation	1	0.423729	1	ENSG00000070193	176	31	11767	2.15671	1	1	100
GOTERM_BP_FAT	GO:0016049~cell growth	1	0.423729	1	ENSG00000066468	176	57	11767	1.17295	1	1	100
GOTERM_BP_FAT	GO:0016331~morphogenesis of embryonic epithelium	1	0.423729	1	ENSG00000101752	176	53	11767	1.26147	1	1	100
GOTERM_BP_FAT	GO:0009220~pyrimidine ribonucleotide biosynthetic process	1	0.423729	1	ENSG00000102967	176	14	11767	4.77557	1	1	100
GOTERM_BP_FAT	GO:0016485~protein processing	1	0.423729	1	ENSG00000136997	176	94	11767	0.711255	1	1	100
GOTERM_BP_FAT	GO:0006983~ER overload response	1	0.423729	1	ENSG00000158615	176	10	11767	6.6858	1	1	100
GOTERM_BP_FAT	GO:0051875~pigment granule localization	1	0.423729	1	ENSG00000115648	176	14	11767	4.77557	1	1	100
GOTERM_BP_FAT	GO:0046777~protein amino acid autophosphorylation	1	0.423729	1	ENSG00000164715	176	84	11767	0.795928	1	1	100
GOTERM_BP_FAT	GO:0007015~actin filament organization	1	0.423729	1	ENSG00000111859	176	71	11767	0.941661	1	1	100
GOTERM_BP_FAT	GO:0014047~glutamate secretion	1	0.423729	1	ENSG00000196586	176	6	11767	11.143	1	1	100
GOTERM_BP_FAT	GO:0010243~response to organic nitrogen	1	0.423729	1	ENSG00000110092	176	58	11767	1.15272	1	1	100
GOTERM_BP_FAT	GO:0031644~regulation of neurological system process	1	0.423729	1	ENSG00000196586	176	137	11767	0.488014	1	1	100
GOTERM_BP_FAT	GO:0014013~regulation of gliogenesis	1	0.423729	1	ENSG00000172201	176	20	11767	3.3429	1	1	100
GOTERM_BP_FAT	GO:0018214~protein amino acid carboxylation	1	0.423729	1	ENSG00000115486	176	1	11767	66.858	1	1	100
GOTERM_BP_FAT	GO:0009896~positive regulation of catabolic process	1	0.423729	1	ENSG00000185950	176	43	11767	1.55484	1	1	100
GOTERM_BP_FAT	GO:0019221~cytokine-mediated signaling pathway	1	0.423729	1	ENSG00000170421	176	62	11767	1.07835	1	1	100
GOTERM_BP_FAT	GO:0042733~embryonic digit morphogenesis	1	0.423729	1	ENSG00000005073	176	24	11767	2.78575	1	1	100
GOTERM_BP_FAT	GO:0030003~cellular cation homeostasis	1	0.423729	1	ENSG00000136997	176	220	11767	0.3039	1	1	100
GOTERM_BP_FAT	GO:0010810~regulation of cell-substrate adhesion	1	0.423729	1	ENSG00000108821	176	43	11767	1.55484	1	1	100
GOTERM_BP_FAT	GO:0070227~lymphocyte apoptosis	1	0.423729	1	ENSG00000136997	176	10	11767	6.6858	1	1	100
GOTERM_BP_FAT	GO:0046847~filopodium assembly	1	0.423729	1	ENSG00000091409	176	15	11767	4.4572	1	1	100
GOTERM_BP_FAT	GO:0033261~regulation of S phase	1	0.423729	1	ENSG00000041515	176	19	11767	3.51884	1	1	100
GOTERM_BP_FAT	GO:0051348~negative regulation of transferase activity	1	0.423729	1	ENSG00000197114	176	93	11767	0.718903	1	1	100
GOTERM_BP_FAT	GO:0030178~negative regulation of Wnt receptor signaling pathway	1	0.423729	1	ENSG00000110092	176	28	11767	2.38778	1	1	100
GOTERM_BP_FAT	GO:0016525~negative regulation of angiogenesis	1	0.423729	1	ENSG00000142515	176	23	11767	2.90687	1	1	100
GOTERM_BP_FAT	GO:0046049~UMP metabolic process	1	0.423729	1	ENSG00000102967	176	3	11767	22.286	1	1	100
GOTERM_BP_FAT	GO:0043502~regulation of muscle adaptation	1	0.423729	1	ENSG00000068024	176	9	11767	7.42866	1	1	100
GOTERM_BP_FAT	GO:0001841~neural tube formation	1	0.423729	1	ENSG00000101752	176	36	11767	1.85717	1	1	100
GOTERM_BP_FAT	GO:0034097~response to cytokine stimulus	1	0.423729	1	ENSG00000068024	176	76	11767	0.87971	1	1	100
GOTERM_BP_FAT	GO:0033233~regulation of protein sumoylation	1	0.423729	1	ENSG00000068024	176	4	11767	16.7145	1	1	100
GOTERM_BP_FAT	GO:0032386~regulation of intracellular transport	1	0.423729	1	ENSG00000047932	176	69	11767	0.968956	1	1	100
GOTERM_BP_FAT	GO:0019217~regulation of fatty acid metabolic process	1	0.423729	1	ENSG00000185950	176	43	11767	1.55484	1	1	100
GOTERM_BP_FAT	GO:0009112~nucleobase metabolic process	1	0.423729	1	ENSG00000102967	176	21	11767	3.18371	1	1	100
GOTERM_BP_FAT	GO:0006469~negative regulation of protein kinase activity	1	0.423729	1	ENSG00000197114	176	84	11767	0.795928	1	1	100
GOTERM_BP_FAT	GO:0009129~pyrimidine nucleoside monophosphate metabolic process	1	0.423729	1	ENSG00000102967	176	4	11767	16.7145	1	1	100
GOTERM_BP_FAT	GO:0046470~phosphatidylcholine metabolic process	1	0.423729	1	ENSG00000102230	176	17	11767	3.93282	1	1	100
GOTERM_BP_FAT	GO:0042482~positive regulation of odontogenesis	1	0.423729	1	ENSG00000064300	176	2	11767	33.429	1	1	100
GOTERM_BP_FAT	GO:0002902~regulation of B cell apoptosis	1	0.423729	1	ENSG00000136997	176	6	11767	11.143	1	1	100
GOTERM_BP_FAT	GO:0007093~mitotic cell cycle checkpoint	1	0.423729	1	ENSG00000110092	176	42	11767	1.59186	1	1	100
GOTERM_BP_FAT	GO:0034623~cellular macromolecular complex disassembly	1	0.423729	1	ENSG00000127989	176	24	11767	2.78575	1	1	100
GOTERM_BP_FAT	GO:0021549~cerebellum development	1	0.423729	1	ENSG00000041515	176	29	11767	2.30545	1	1	100
GOTERM_BP_FAT	GO:0048635~negative regulation of muscle development	1	0.423729	1	ENSG00000064300	176	9	11767	7.42866	1	1	100
GOTERM_BP_FAT	GO:0014874~response to stimulus involved in regulation of muscle adaptation	1	0.423729	1	ENSG00000068024	176	3	11767	22.286	1	1	100
GOTERM_BP_FAT	GO:0051188~cofactor biosynthetic process	1	0.423729	1	ENSG00000124217	176	93	11767	0.718903	1	1	100
GOTERM_BP_FAT	GO:0051799~negative regulation of hair follicle development	1	0.423729	1	ENSG00000064300	176	2	11767	33.429	1	1	100
GOTERM_BP_FAT	GO:0045793~positive regulation of cell size	1	0.423729	1	ENSG00000179242	176	44	11767	1.5195	1	1	100
GOTERM_BP_FAT	GO:0001656~metanephros development	1	0.423729	1	ENSG00000005073	176	39	11767	1.71431	1	1	100
GOTERM_BP_FAT	GO:0001550~ovarian cumulus expansion	1	0.423729	1	ENSG00000138696	176	2	11767	33.429	1	1	100
GOTERM_BP_FAT	GO:0010984~regulation of lipoprotein particle clearance	1	0.423729	1	ENSG00000101670	176	5	11767	13.3716	1	1	100
GOTERM_BP_FAT	GO:0033627~cell adhesion mediated by integrin	1	0.423729	1	ENSG00000091409	176	7	11767	9.55114	1	1	100
GOTERM_BP_FAT	GO:0008217~regulation of blood pressure	1	0.423729	1	ENSG00000176358	176	85	11767	0.786564	1	1	100
GOTERM_BP_FAT	GO:0006110~regulation of glycolysis	1	0.423729	1	ENSG00000068024	176	12	11767	5.5715	1	1	100
GOTERM_BP_FAT	GO:0051129~negative regulation of cellular component organization	1	0.423729	1	ENSG00000064300	176	132	11767	0.5065	1	1	100
GOTERM_BP_FAT	GO:0007178~transmembrane receptor protein serine/threonine kinase signaling pathway	1	0.423729	1	ENSG00000138696	176	95	11767	0.703768	1	1	100
GOTERM_BP_FAT	GO:0021535~cell migration in hindbrain	1	0.423729	1	ENSG00000076356	176	5	11767	13.3716	1	1	100
GOTERM_BP_FAT	GO:0006451~translational readthrough	1	0.423729	1	ENSG00000132394	176	5	11767	13.3716	1	1	100
GOTERM_BP_FAT	GO:0048592~eye morphogenesis	1	0.423729	1	ENSG00000172819	176	61	11767	1.09603	1	1	100
GOTERM_BP_FAT	GO:0034620~cellular response to unfolded protein	1	0.423729	1	ENSG00000110092	176	20	11767	3.3429	1	1	100
GOTERM_BP_FAT	GO:0040036~regulation of fibroblast growth factor receptor signaling pathway	1	0.423729	1	ENSG00000064300	176	6	11767	11.143	1	1	100
GOTERM_BP_FAT	GO:0046131~pyrimidine ribonucleoside metabolic process	1	0.423729	1	ENSG00000102967	176	16	11767	4.17862	1	1	100
GOTERM_BP_FAT	GO:0016126~sterol biosynthetic process	1	0.423729	1	ENSG00000001626	176	35	11767	1.91023	1	1	100
GOTERM_BP_FAT	GO:0043491~protein kinase B signaling cascade	1	0.423729	1	ENSG00000133056	176	8	11767	8.35724	1	1	100
GOTERM_BP_FAT	GO:0045725~positive regulation of glycogen biosynthetic process	1	0.423729	1	ENSG00000185950	176	10	11767	6.6858	1	1	100
GOTERM_BP_FAT	GO:0032012~regulation of ARF protein signal transduction	1	0.423729	1	ENSG00000153317	176	43	11767	1.55484	1	1	100
GOTERM_BP_FAT	GO:0042327~positive regulation of phosphorylation	1	0.423729	1	ENSG00000110092	176	82	11767	0.815341	1	1	100
GOTERM_BP_FAT	GO:0060324~face development	1	0.423729	1	ENSG00000108821	176	11	11767	6.078	1	1	100
GOTERM_BP_FAT	GO:0015980~energy derivation by oxidation of organic compounds	1	0.423729	1	ENSG00000115840	176	125	11767	0.534864	1	1	100
GOTERM_BP_FAT	GO:0022415~viral reproductive process	1	0.423729	1	ENSG00000175029	176	58	11767	1.15272	1	1	100
GOTERM_BP_FAT	GO:0008033~tRNA processing	1	0.423729	1	ENSG00000124217	176	70	11767	0.955114	1	1	100
GOTERM_BP_FAT	GO:0021885~forebrain cell migration	1	0.423729	1	ENSG00000189056	176	16	11767	4.17862	1	1	100
GOTERM_BP_FAT	GO:0030728~ovulation	1	0.423729	1	ENSG00000118689	176	13	11767	5.14292	1	1	100
GOTERM_BP_FAT	GO:0007009~plasma membrane organization	1	0.423729	1	ENSG00000163746	176	14	11767	4.77557	1	1	100
GOTERM_BP_FAT	GO:0060346~bone trabecula formation	1	0.423729	1	ENSG00000108821	176	2	11767	33.429	1	1	100
GOTERM_BP_FAT	GO:0050679~positive regulation of epithelial cell proliferation	1	0.423729	1	ENSG00000070193	176	36	11767	1.85717	1	1	100
GOTERM_BP_FAT	GO:0045927~positive regulation of growth	1	0.423729	1	ENSG00000179242	176	72	11767	0.928583	1	1	100
GOTERM_BP_FAT	GO:0000726~non-recombinational repair	1	0.423729	1	ENSG00000101868	176	13	11767	5.14292	1	1	100
GOTERM_BP_FAT	GO:0032891~negative regulation of organic acid transport	1	0.423729	1	ENSG00000185950	176	7	11767	9.55114	1	1	100
GOTERM_BP_FAT	GO:0035150~regulation of tube size	1	0.423729	1	ENSG00000001626	176	43	11767	1.55484	1	1	100
GOTERM_BP_FAT	GO:0007440~foregut morphogenesis	1	0.423729	1	ENSG00000137166	176	4	11767	16.7145	1	1	100
GOTERM_BP_FAT	GO:0006041~glucosamine metabolic process	1	0.423729	1	ENSG00000167080	176	20	11767	3.3429	1	1	100
GOTERM_BP_FAT	GO:0006271~DNA strand elongation during DNA replication	1	0.423729	1	ENSG00000101868	176	5	11767	13.3716	1	1	100
GOTERM_BP_FAT	GO:0045773~positive regulation of axon extension	1	0.423729	1	ENSG00000179242	176	9	11767	7.42866	1	1	100
GOTERM_BP_FAT	GO:0007602~phototransduction	1	0.423729	1	ENSG00000167083	176	28	11767	2.38778	1	1	100
GOTERM_BP_FAT	GO:0043624~cellular protein complex disassembly	1	0.423729	1	ENSG00000127989	176	16	11767	4.17862	1	1	100
GOTERM_BP_FAT	GO:0007051~spindle organization	1	0.423729	1	ENSG00000138162	176	44	11767	1.5195	1	1	100
GOTERM_BP_FAT	GO:0006873~cellular ion homeostasis	1	0.423729	1	ENSG00000136997	176	333	11767	0.200775	1	1	100
GOTERM_BP_FAT	GO:0042177~negative regulation of protein catabolic process	1	0.423729	1	ENSG00000198625	176	16	11767	4.17862	1	1	100
GOTERM_BP_FAT	GO:0002904~positive regulation of B cell apoptosis	1	0.423729	1	ENSG00000136997	176	3	11767	22.286	1	1	100
GOTERM_BP_FAT	GO:0015808~L-alanine transport	1	0.423729	1	ENSG00000123643	176	4	11767	16.7145	1	1	100
GOTERM_BP_FAT	GO:0051149~positive regulation of muscle cell differentiation	1	0.423729	1	ENSG00000140836	176	10	11767	6.6858	1	1	100
GOTERM_BP_FAT	GO:0050872~white fat cell differentiation	1	0.423729	1	ENSG00000175029	176	7	11767	9.55114	1	1	100
GOTERM_BP_FAT	GO:0032026~response to magnesium ion	1	0.423729	1	ENSG00000110092	176	8	11767	8.35724	1	1	100
GOTERM_BP_FAT	GO:0007599~hemostasis	1	0.423729	1	ENSG00000115486	176	101	11767	0.66196	1	1	100
GOTERM_BP_FAT	GO:0070633~transepithelial transport	1	0.423729	1	ENSG00000001626	176	13	11767	5.14292	1	1	100
GOTERM_BP_FAT	GO:0006390~transcription from mitochondrial promoter	1	0.423729	1	ENSG00000127989	176	5	11767	13.3716	1	1	100
GOTERM_BP_FAT	GO:0008202~steroid metabolic process	1	0.423729	1	ENSG00000001626	176	187	11767	0.357529	1	1	100
GOTERM_BP_FAT	GO:0010565~regulation of cellular ketone metabolic process	1	0.423729	1	ENSG00000185950	176	51	11767	1.31094	1	1	100
GOTERM_BP_FAT	GO:0051668~localization within membrane	1	0.423729	1	ENSG00000068615	176	12	11767	5.5715	1	1	100
GOTERM_BP_FAT	GO:0045683~negative regulation of epidermis development	1	0.423729	1	ENSG00000064300	176	5	11767	13.3716	1	1	100
GOTERM_BP_FAT	GO:0030183~B cell differentiation	1	0.423729	1	ENSG00000068024	176	44	11767	1.5195	1	1	100
GOTERM_BP_FAT	GO:0033365~protein localization in organelle	1	0.423729	1	ENSG00000070193	176	139	11767	0.480992	1	1	100
GOTERM_BP_FAT	GO:0032328~alanine transport	1	0.423729	1	ENSG00000123643	176	5	11767	13.3716	1	1	100
GOTERM_BP_FAT	GO:0009583~detection of light stimulus	1	0.423729	1	ENSG00000167083	176	33	11767	2.026	1	1	100
GOTERM_BP_FAT	GO:0050927~positive regulation of positive chemotaxis	1	0.423729	1	ENSG00000070193	176	15	11767	4.4572	1	1	100
GOTERM_BP_FAT	GO:0042490~mechanoreceptor differentiation	1	0.423729	1	ENSG00000196586	176	24	11767	2.78575	1	1	100
GOTERM_BP_FAT	GO:0017121~phospholipid scrambling	1	0.423729	1	ENSG00000163746	176	3	11767	22.286	1	1	100
GOTERM_BP_FAT	GO:0034368~protein-lipid complex remodeling	1	0.423729	1	ENSG00000101670	176	17	11767	3.93282	1	1	100
GOTERM_BP_FAT	GO:0045749~negative regulation of S phase of mitotic cell cycle	1	0.423729	1	ENSG00000041515	176	9	11767	7.42866	1	1	100
GOTERM_BP_FAT	GO:0001947~heart looping	1	0.423729	1	ENSG00000101752	176	19	11767	3.51884	1	1	100
GOTERM_BP_FAT	GO:0060538~skeletal muscle organ development	1	0.423729	1	ENSG00000168899	176	58	11767	1.15272	1	1	100
GOTERM_BP_FAT	GO:0043393~regulation of protein binding	1	0.423729	1	ENSG00000068024	176	28	11767	2.38778	1	1	100
GOTERM_BP_FAT	GO:0007059~chromosome segregation	1	0.423729	1	ENSG00000136982	176	78	11767	0.857153	1	1	100
GOTERM_BP_FAT	GO:0021795~cerebral cortex cell migration	1	0.423729	1	ENSG00000189056	176	14	11767	4.77557	1	1	100
GOTERM_BP_FAT	GO:0006814~sodium ion transport	1	0.423729	1	ENSG00000112337	176	123	11767	0.543561	1	1	100
GOTERM_BP_FAT	GO:0006221~pyrimidine nucleotide biosynthetic process	1	0.423729	1	ENSG00000102967	176	21	11767	3.18371	1	1	100
GOTERM_BP_FAT	GO:0048260~positive regulation of receptor-mediated endocytosis	1	0.423729	1	ENSG00000070193	176	9	11767	7.42866	1	1	100
GOTERM_BP_FAT	GO:0007519~skeletal muscle tissue development	1	0.423729	1	ENSG00000168899	176	58	11767	1.15272	1	1	100
GOTERM_BP_FAT	GO:0042692~muscle cell differentiation	1	0.423729	1	ENSG00000070193	176	113	11767	0.591663	1	1	100
GOTERM_BP_FAT	GO:0034330~cell junction organization	1	0.423729	1	ENSG00000091409	176	54	11767	1.23811	1	1	100
GOTERM_BP_FAT	GO:0030856~regulation of epithelial cell differentiation	1	0.423729	1	ENSG00000110092	176	25	11767	2.67432	1	1	100
GOTERM_BP_FAT	GO:0006303~double-strand break repair via nonhomologous end joining	1	0.423729	1	ENSG00000101868	176	9	11767	7.42866	1	1	100
GOTERM_BP_FAT	GO:0009395~phospholipid catabolic process	1	0.423729	1	ENSG00000101670	176	21	11767	3.18371	1	1	100
GOTERM_BP_FAT	GO:0022904~respiratory electron transport chain	1	0.423729	1	ENSG00000115840	176	53	11767	1.26147	1	1	100
GOTERM_BP_FAT	GO:0010748~negative regulation of plasma membrane long-chain fatty acid transport	1	0.423729	1	ENSG00000185950	176	4	11767	16.7145	1	1	100
GOTERM_BP_FAT	GO:0048384~retinoic acid receptor signaling pathway	1	0.423729	1	ENSG00000172819	176	11	11767	6.078	1	1	100
GOTERM_BP_FAT	GO:0033157~regulation of intracellular protein transport	1	0.423729	1	ENSG00000047932	176	51	11767	1.31094	1	1	100
GOTERM_BP_FAT	GO:0048771~tissue remodeling	1	0.423729	1	ENSG00000070193	176	51	11767	1.31094	1	1	100
GOTERM_BP_FAT	GO:0045923~positive regulation of fatty acid metabolic process	1	0.423729	1	ENSG00000185950	176	17	11767	3.93282	1	1	100
GOTERM_BP_FAT	GO:0043470~regulation of carbohydrate catabolic process	1	0.423729	1	ENSG00000068024	176	16	11767	4.17862	1	1	100
GOTERM_BP_FAT	GO:0050873~brown fat cell differentiation	1	0.423729	1	ENSG00000091409	176	21	11767	3.18371	1	1	100
GOTERM_BP_FAT	GO:0017187~peptidyl-glutamic acid carboxylation	1	0.423729	1	ENSG00000115486	176	1	11767	66.858	1	1	100
GOTERM_BP_FAT	GO:0019722~calcium-mediated signaling	1	0.423729	1	ENSG00000173612	176	32	11767	2.08931	1	1	100
GOTERM_BP_FAT	GO:0044272~sulfur compound biosynthetic process	1	0.423729	1	ENSG00000168906	176	48	11767	1.39287	1	1	100
GOTERM_BP_FAT	GO:0006091~generation of precursor metabolites and energy	1	0.423729	1	ENSG00000115840	176	278	11767	0.240496	1	1	100
GOTERM_BP_FAT	GO:0006414~translational elongation	1	0.423729	1	ENSG00000132394	176	95	11767	0.703768	1	1	100
GOTERM_BP_FAT	GO:0042058~regulation of epidermal growth factor receptor signaling pathway	1	0.423729	1	ENSG00000197114	176	22	11767	3.039	1	1	100
GOTERM_BP_FAT	GO:0030509~BMP signaling pathway	1	0.423729	1	ENSG00000138696	176	40	11767	1.67145	1	1	100
GOTERM_BP_FAT	GO:0043589~skin morphogenesis	1	0.423729	1	ENSG00000108821	176	4	11767	16.7145	1	1	100
GOTERM_BP_FAT	GO:0009225~nucleotide-sugar metabolic process	1	0.423729	1	ENSG00000167080	176	13	11767	5.14292	1	1	100
GOTERM_BP_FAT	GO:0051320~S phase	1	0.423729	1	ENSG00000101868	176	5	11767	13.3716	1	1	100
GOTERM_BP_FAT	GO:0051052~regulation of DNA metabolic process	1	0.423729	1	ENSG00000136997	176	108	11767	0.619055	1	1	100
GOTERM_BP_FAT	GO:0007176~regulation of epidermal growth factor receptor activity	1	0.423729	1	ENSG00000197114	176	15	11767	4.4572	1	1	100
GOTERM_BP_FAT	GO:0010165~response to X-ray	1	0.423729	1	ENSG00000110092	176	14	11767	4.77557	1	1	100
GOTERM_BP_FAT	GO:0000070~mitotic sister chromatid segregation	1	0.423729	1	ENSG00000136982	176	33	11767	2.026	1	1	100
GOTERM_BP_FAT	GO:0048546~digestive tract morphogenesis	1	0.423729	1	ENSG00000137166	176	19	11767	3.51884	1	1	100
GOTERM_BP_FAT	GO:0042401~biogenic amine biosynthetic process	1	0.423729	1	ENSG00000115758	176	23	11767	2.90687	1	1	100
GOTERM_BP_FAT	GO:0051412~response to corticosterone stimulus	1	0.423729	1	ENSG00000110092	176	14	11767	4.77557	1	1	100
GOTERM_BP_FAT	GO:0030321~transepithelial chloride transport	1	0.423729	1	ENSG00000001626	176	9	11767	7.42866	1	1	100
GOTERM_BP_FAT	GO:0048617~embryonic foregut morphogenesis	1	0.423729	1	ENSG00000137166	176	3	11767	22.286	1	1	100
GOTERM_BP_FAT	GO:0010677~negative regulation of cellular carbohydrate metabolic process	1	0.423729	1	ENSG00000068024	176	9	11767	7.42866	1	1	100
GOTERM_BP_FAT	GO:0006310~DNA recombination	1	0.423729	1	ENSG00000182185	176	100	11767	0.66858	1	1	100
GOTERM_BP_FAT	GO:0051615~histamine uptake	1	0.423729	1	ENSG00000146477	176	1	11767	66.858	1	1	100
GOTERM_BP_FAT	GO:0048536~spleen development	1	0.423729	1	ENSG00000070193	176	18	11767	3.71433	1	1	100
GOTERM_BP_FAT	GO:0042996~regulation of Golgi to plasma membrane protein transport	1	0.423729	1	ENSG00000047932	176	1	11767	66.858	1	1	100
GOTERM_BP_FAT	GO:0032890~regulation of organic acid transport	1	0.423729	1	ENSG00000185950	176	12	11767	5.5715	1	1	100
GOTERM_BP_FAT	GO:0030307~positive regulation of cell growth	1	0.423729	1	ENSG00000179242	176	38	11767	1.75942	1	1	100
GOTERM_BP_FAT	GO:0070230~positive regulation of lymphocyte apoptosis	1	0.423729	1	ENSG00000136997	176	4	11767	16.7145	1	1	100
GOTERM_BP_FAT	GO:0005979~regulation of glycogen biosynthetic process	1	0.423729	1	ENSG00000185950	176	14	11767	4.77557	1	1	100
GOTERM_BP_FAT	GO:0032963~collagen metabolic process	1	0.423729	1	ENSG00000108821	176	27	11767	2.47622	1	1	100
GOTERM_BP_FAT	GO:0030522~intracellular receptor-mediated signaling pathway	1	0.423729	1	ENSG00000172819	176	73	11767	0.915862	1	1	100
GOTERM_BP_FAT	GO:0006338~chromatin remodeling	1	0.423729	1	ENSG00000068024	176	53	11767	1.26147	1	1	100
GOTERM_BP_FAT	GO:0008634~negative regulation of survival gene product expression	1	0.423729	1	ENSG00000136997	176	7	11767	9.55114	1	1	100
GOTERM_BP_FAT	GO:0021895~cerebral cortex neuron differentiation	1	0.423729	1	ENSG00000172201	176	11	11767	6.078	1	1	100
GOTERM_BP_FAT	GO:0018202~peptidyl-histidine modification	1	0.423729	1	ENSG00000005882	176	7	11767	9.55114	1	1	100
GOTERM_BP_FAT	GO:0035116~embryonic hindlimb morphogenesis	1	0.423729	1	ENSG00000172819	176	17	11767	3.93282	1	1	100
GOTERM_BP_FAT	GO:0055082~cellular chemical homeostasis	1	0.423729	1	ENSG00000136997	176	339	11767	0.197221	1	1	100
GOTERM_BP_FAT	GO:0042254~ribosome biogenesis	1	0.423729	1	ENSG00000179409	176	116	11767	0.576362	1	1	100
GOTERM_BP_FAT	GO:0032980~keratinocyte activation	1	0.423729	1	ENSG00000172867	176	1	11767	66.858	1	1	100
GOTERM_BP_FAT	GO:0006935~chemotaxis	1	0.423729	1	ENSG00000070193	176	124	11767	0.539177	1	1	100
GOTERM_BP_FAT	GO:0010171~body morphogenesis	1	0.423729	1	ENSG00000108821	176	14	11767	4.77557	1	1	100
GOTERM_BP_FAT	GO:0045912~negative regulation of carbohydrate metabolic process	1	0.423729	1	ENSG00000068024	176	9	11767	7.42866	1	1	100
GOTERM_BP_FAT	GO:0046877~regulation of saliva secretion	1	0.423729	1	ENSG00000176358	176	1	11767	66.858	1	1	100
GOTERM_BP_FAT	GO:0040037~negative regulation of fibroblast growth factor receptor signaling pathway	1	0.423729	1	ENSG00000064300	176	3	11767	22.286	1	1	100
GOTERM_BP_FAT	GO:0007157~heterophilic cell adhesion	1	0.423729	1	ENSG00000179242	176	17	11767	3.93282	1	1	100
GOTERM_BP_FAT	GO:0006986~response to unfolded protein	1	0.423729	1	ENSG00000110092	176	65	11767	1.02858	1	1	100
GOTERM_BP_FAT	GO:0051047~positive regulation of secretion	1	0.423729	1	ENSG00000176358	176	96	11767	0.696437	1	1	100
GOTERM_BP_FAT	GO:0022037~metencephalon development	1	0.423729	1	ENSG00000041515	176	33	11767	2.026	1	1	100
GOTERM_BP_FAT	GO:0014897~striated muscle hypertrophy	1	0.423729	1	ENSG00000068024	176	3	11767	22.286	1	1	100
GOTERM_BP_FAT	GO:0031668~cellular response to extracellular stimulus	1	0.423729	1	ENSG00000091409	176	62	11767	1.07835	1	1	100
GOTERM_BP_FAT	GO:0032331~negative regulation of chondrocyte differentiation	1	0.423729	1	ENSG00000125398	176	4	11767	16.7145	1	1	100
GOTERM_BP_FAT	GO:0007369~gastrulation	1	0.423729	1	ENSG00000101246	176	66	11767	1.013	1	1	100
GOTERM_BP_FAT	GO:0019216~regulation of lipid metabolic process	1	0.423729	1	ENSG00000185950	176	102	11767	0.65547	1	1	100
GOTERM_BP_FAT	GO:0050996~positive regulation of lipid catabolic process	1	0.423729	1	ENSG00000185950	176	9	11767	7.42866	1	1	100
GOTERM_BP_FAT	GO:0042487~regulation of odontogenesis of dentine-containing tooth	1	0.423729	1	ENSG00000064300	176	5	11767	13.3716	1	1	100
GOTERM_BP_FAT	GO:0043010~camera-type eye development	1	0.423729	1	ENSG00000138696	176	92	11767	0.726717	1	1	100
GOTERM_BP_FAT	GO:0045471~response to ethanol	1	0.423729	1	ENSG00000110092	176	58	11767	1.15272	1	1	100
GOTERM_BP_FAT	GO:0006047~UDP-N-acetylglucosamine metabolic process	1	0.423729	1	ENSG00000167080	176	6	11767	11.143	1	1	100
GOTERM_BP_FAT	GO:0019058~viral infectious cycle	1	0.423729	1	ENSG00000175029	176	39	11767	1.71431	1	1	100
GOTERM_BP_FAT	GO:0045023~G0 to G1 transition	1	0.423729	1	ENSG00000198625	176	1	11767	66.858	1	1	100
GOTERM_BP_FAT	GO:0001503~ossification	1	0.423729	1	ENSG00000108821	176	103	11767	0.649106	1	1	100
GOTERM_BP_FAT	GO:0015697~quaternary ammonium group transport	1	0.423729	1	ENSG00000146477	176	11	11767	6.078	1	1	100
GOTERM_BP_FAT	GO:0051189~prosthetic group metabolic process	1	0.423729	1	ENSG00000124217	176	6	11767	11.143	1	1	100
GOTERM_BP_FAT	GO:0048259~regulation of receptor-mediated endocytosis	1	0.423729	1	ENSG00000070193	176	15	11767	4.4572	1	1	100
GOTERM_BP_FAT	GO:0002237~response to molecule of bacterial origin	1	0.423729	1	ENSG00000042832	176	79	11767	0.846303	1	1	100
GOTERM_BP_FAT	GO:0006790~sulfur metabolic process	1	0.423729	1	ENSG00000168906	176	108	11767	0.619055	1	1	100
GOTERM_BP_FAT	GO:0034227~tRNA thio-modification	1	0.423729	1	ENSG00000124217	176	4	11767	16.7145	1	1	100
GOTERM_BP_FAT	GO:0015810~aspartate transport	1	0.423729	1	ENSG00000115840	176	7	11767	9.55114	1	1	100
GOTERM_BP_FAT	GO:0050910~detection of mechanical stimulus involved in sensory perception of sound	1	0.423729	1	ENSG00000136997	176	9	11767	7.42866	1	1	100
GOTERM_BP_FAT	GO:0009799~determination of symmetry	1	0.423729	1	ENSG00000070193	176	41	11767	1.63068	1	1	100
GOTERM_BP_FAT	GO:0033235~positive regulation of protein sumoylation	1	0.423729	1	ENSG00000068024	176	4	11767	16.7145	1	1	100
GOTERM_BP_FAT	GO:0022900~electron transport chain	1	0.423729	1	ENSG00000115840	176	97	11767	0.689257	1	1	100
GOTERM_BP_FAT	GO:0032881~regulation of polysaccharide metabolic process	1	0.423729	1	ENSG00000185950	176	15	11767	4.4572	1	1	100
GOTERM_BP_FAT	GO:0048167~regulation of synaptic plasticity	1	0.423729	1	ENSG00000196586	176	60	11767	1.1143	1	1	100
GOTERM_BP_FAT	GO:0033619~membrane protein proteolysis	1	0.423729	1	ENSG00000064300	176	20	11767	3.3429	1	1	100
GOTERM_BP_FAT	GO:0034088~maintenance of mitotic sister chromatid cohesion	1	0.423729	1	ENSG00000136982	176	3	11767	22.286	1	1	100
GOTERM_BP_FAT	GO:0000084~S phase of mitotic cell cycle	1	0.423729	1	ENSG00000101868	176	5	11767	13.3716	1	1	100
GOTERM_BP_FAT	GO:0044242~cellular lipid catabolic process	1	0.423729	1	ENSG00000101670	176	75	11767	0.891439	1	1	100
GOTERM_BP_FAT	GO:0032880~regulation of protein localization	1	0.423729	1	ENSG00000047932	176	127	11767	0.526441	1	1	100
GOTERM_BP_FAT	GO:0009411~response to UV	1	0.423729	1	ENSG00000110092	176	54	11767	1.23811	1	1	100
GOTERM_BP_FAT	GO:0006836~neurotransmitter transport	1	0.423729	1	ENSG00000146477	176	79	11767	0.846303	1	1	100
GOTERM_BP_FAT	GO:0015800~acidic amino acid transport	1	0.423729	1	ENSG00000115840	176	15	11767	4.4572	1	1	100
GOTERM_BP_FAT	GO:0050921~positive regulation of chemotaxis	1	0.423729	1	ENSG00000070193	176	25	11767	2.67432	1	1	100
GOTERM_BP_FAT	GO:0030097~hemopoiesis	1	0.423729	1	ENSG00000068024	176	213	11767	0.313887	1	1	100
GOTERM_BP_FAT	GO:0070228~regulation of lymphocyte apoptosis	1	0.423729	1	ENSG00000136997	176	10	11767	6.6858	1	1	100
GOTERM_BP_FAT	GO:0033500~carbohydrate homeostasis	1	0.423729	1	ENSG00000118689	176	44	11767	1.5195	1	1	100
GOTERM_BP_FAT	GO:0032370~positive regulation of lipid transport	1	0.423729	1	ENSG00000101670	176	10	11767	6.6858	1	1	100
GOTERM_BP_FAT	GO:0010001~glial cell differentiation	1	0.423729	1	ENSG00000189056	176	51	11767	1.31094	1	1	100
GOTERM_BP_FAT	GO:0031345~negative regulation of cell projection organization	1	0.423729	1	ENSG00000064300	176	25	11767	2.67432	1	1	100
GOTERM_BP_FAT	GO:0048547~gut morphogenesis	1	0.423729	1	ENSG00000137166	176	16	11767	4.17862	1	1	100
GOTERM_BP_FAT	GO:0009914~hormone transport	1	0.423729	1	ENSG00000108753	176	44	11767	1.5195	1	1	100
GOTERM_BP_FAT	GO:0030035~microspike assembly	1	0.423729	1	ENSG00000091409	176	16	11767	4.17862	1	1	100
GOTERM_BP_FAT	GO:0042481~regulation of odontogenesis	1	0.423729	1	ENSG00000064300	176	8	11767	8.35724	1	1	100
GOTERM_BP_FAT	GO:0002790~peptide secretion	1	0.423729	1	ENSG00000108753	176	37	11767	1.80697	1	1	100
GOTERM_BP_FAT	GO:0035148~tube lumen formation	1	0.423729	1	ENSG00000101752	176	39	11767	1.71431	1	1	100
GOTERM_BP_FAT	GO:0007031~peroxisome organization	1	0.423729	1	ENSG00000142655	176	23	11767	2.90687	1	1	100
GOTERM_BP_FAT	GO:0007127~meiosis I	1	0.423729	1	ENSG00000182185	176	42	11767	1.59186	1	1	100
GOTERM_BP_FAT	GO:0006891~intra-Golgi vesicle-mediated transport	1	0.423729	1	ENSG00000164597	176	17	11767	3.93282	1	1	100
GOTERM_BP_FAT	GO:0021511~spinal cord patterning	1	0.423729	1	ENSG00000189056	176	12	11767	5.5715	1	1	100
GOTERM_BP_FAT	GO:0010982~regulation of high-density lipoprotein particle clearance	1	0.423729	1	ENSG00000101670	176	2	11767	33.429	1	1	100
GOTERM_BP_FAT	GO:0001957~intramembranous ossification	1	0.423729	1	ENSG00000108821	176	5	11767	13.3716	1	1	100
GOTERM_BP_FAT	GO:0019276~UDP-N-acetylgalactosamine metabolic process	1	0.423729	1	ENSG00000167080	176	3	11767	22.286	1	1	100
GOTERM_BP_FAT	GO:0010832~negative regulation of myotube differentiation	1	0.423729	1	ENSG00000068024	176	5	11767	13.3716	1	1	100
GOTERM_BP_FAT	GO:0031647~regulation of protein stability	1	0.423729	1	ENSG00000198625	176	38	11767	1.75942	1	1	100
GOTERM_BP_FAT	GO:0008203~cholesterol metabolic process	1	0.423729	1	ENSG00000001626	176	90	11767	0.742866	1	1	100
GOTERM_BP_FAT	GO:0033197~response to vitamin E	1	0.423729	1	ENSG00000110092	176	2	11767	33.429	1	1	100
GOTERM_BP_FAT	GO:0042475~odontogenesis of dentine-containing tooth	1	0.423729	1	ENSG00000091409	176	36	11767	1.85717	1	1	100
GOTERM_BP_FAT	GO:0009123~nucleoside monophosphate metabolic process	1	0.423729	1	ENSG00000102967	176	61	11767	1.09603	1	1	100
GOTERM_BP_FAT	GO:0048584~positive regulation of response to stimulus	1	0.423729	1	ENSG00000070193	176	206	11767	0.324553	1	1	100
GOTERM_BP_FAT	GO:0006367~transcription initiation from RNA polymerase II promoter	1	0.423729	1	ENSG00000112242	176	67	11767	0.99788	1	1	100
GOTERM_BP_FAT	GO:0007281~germ cell development	1	0.423729	1	ENSG00000118689	176	92	11767	0.726717	1	1	100
GOTERM_BP_FAT	GO:0050880~regulation of blood vessel size	1	0.423729	1	ENSG00000001626	176	43	11767	1.55484	1	1	100
[truncated: 1,907 more rows]
