# Supplementary figures and images for: An AR-ERG transcriptional signature defined by long-range chromatin interactomes in prostate cancer cells
Source: PubMed Central journal article supplement — Genome Res. 2019 Feb;29(2):223–35. doi: 10.1101/gr.230243.117 (PMC6360806; doi:10.1101/gr.230243.117), 2019-02

a

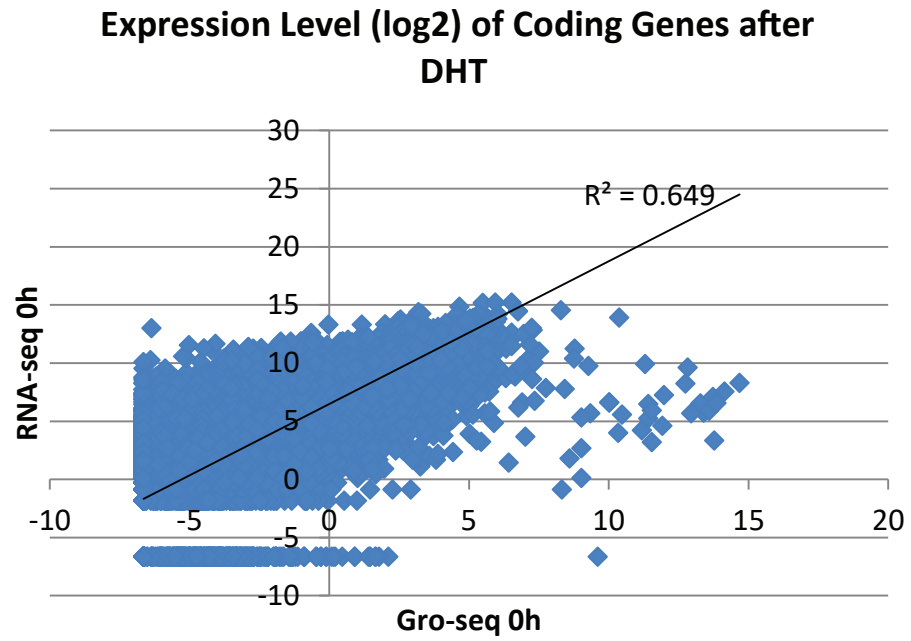

b

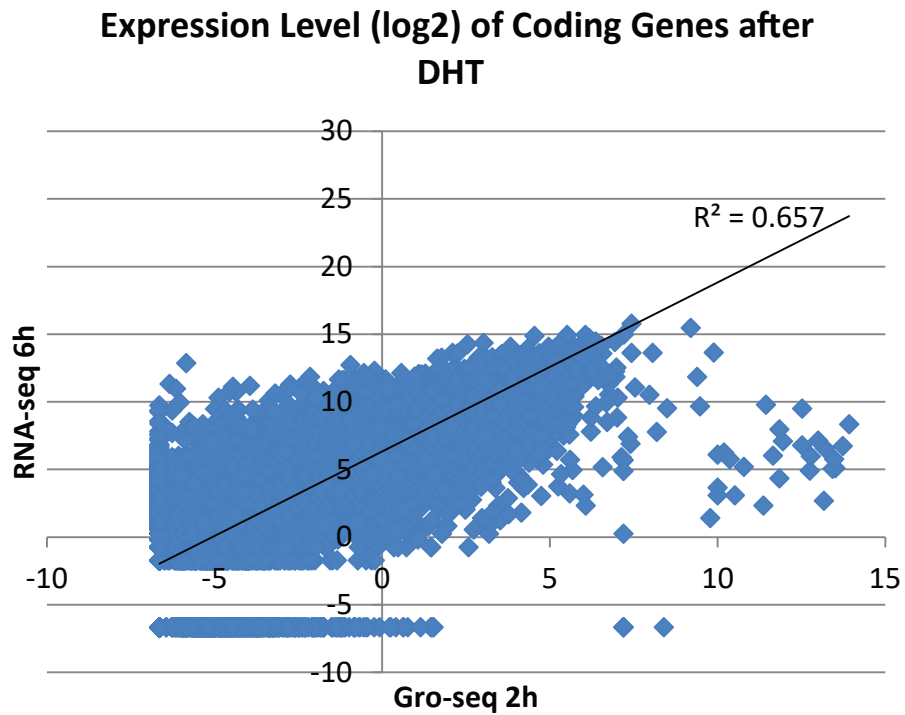

Figure.S9: Correlation between Gro-Seq and RNA-seq. (a)- Gro-seq 0h vs RNA-seq 0h. (b) Gro-seq 2h vs RNA-seq 6h

Supplement: supp_gr.230243.117_Supplemental_Fig_S9.pdf [file supp_gr.230243.117_Supplemental_Fig_S9.pdf]
